# Supplementary material for: Diastereo- and enantioselective rhodium(iii)-catalyzed reductive cyclization of cyclohexadienone-containing 1,6-dienes
Source: Royal Society of Chemistry journal article supplement (doi:10.1039/d1cc03645a), 2021-01-01

## Supporting Information

### Diastereo- and Enantioselective Rhodium(III)-Catalyzed Reductive Cyclization of Cyclohexadienone-Containing 1,6-Dienes

Yun-Xuan Tan, Pei-Ying Peng, Ya-Jie Wang, Xi-Liang Liu, Wenbo Ye,\* Dingding Gao,\*  
Guo-Qiang Lin, and Ping Tian\*

#### Contents

|                                                                        |    |
|------------------------------------------------------------------------|----|
| 1. General information .....                                           | 2  |
| 2. Substrate preparation.....                                          | 2  |
| 3. Substrate scope of cyclohexadienone-tethered alkenes .....          | 5  |
| 4. Kinetic resolution of <i>rac</i> - <b>1z</b> .....                  | 26 |
| 5. Deuterium-labelling experiment .....                                | 28 |
| 6. Subgram-scale experiment.....                                       | 29 |
| 7. Transformations of cyclization product .....                        | 29 |
| 8. One-pot process to polycyclic products .....                        | 33 |
| 9. Proposed reaction mechanism.....                                    | 35 |
| 10. <sup>1</sup> H NMR, <sup>13</sup> C NMR, HMQC, and NOE Copies..... | 37 |

## 1. General information

All solvents were dried before use following the standard procedures. Unless otherwise indicated, all starting materials were obtained from commercial suppliers and were used without further purification. The  $^1\text{H}$  and  $^{13}\text{C}$  NMR spectra were recorded on Bruker AV-400 MHz, Bruker AV-500 MHz and Bruker AV-600 MHz in the indicated solvents. Chemical shifts are reported in  $\delta$  (ppm) referenced to an internal TMS standard for  $^1\text{H}$  NMR and  $\text{CDCl}_3$  ( $\delta = 77.0$  ppm) for  $^{13}\text{C}$  NMR. Coupling constants ( $J$ ) are quoted in Hz. Optical rotations were measured on Anton Paar MCP 5500. ESI mass spectra were recorded on Agilent 1200/G6100A. EI mass spectra were recorded on Waters Micromass DCT Premier.

## 2. Substrate preparation

**Note:** Substrates **1a–1u**, **1z**, **1ab**, and **1ac** were synthesized according to our previous reports.<sup>[1]</sup>

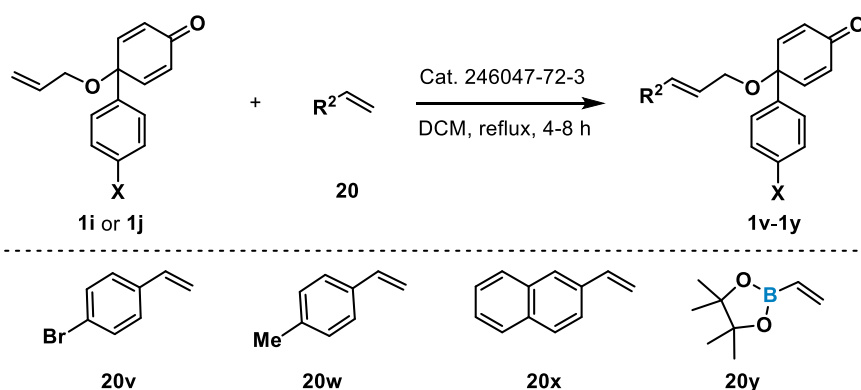

**General procedure for preparation of substrates 1v–1y:** A dried bottle was charged with **1i** or **1j** (2.0 mmol, 1.0 equiv) and Cat. 246047-72-3 (84.9 mg, 5 mol%), backfilled with argon. Then substrate **20** (10 mmol, 5.0 equiv) and DCM (10 mL) were added. After the mixture was stirred at 50 °C for 4 to 8 h, the reaction mixture was cooled to room temperature. The reaction mixture was concentrated in vacuo and the residue was purified by flash silica gel chromatography to afford the desired product **1v–1y**.

[1] For the preparation of substrates **1a–1k**, **1m–1t**, and **1ab**, see: (a) Y.-X. Tan, F. Zhang, P.-P. Xie, S.-Q. Zhang, Y.-F. Wang, Q.-H. Li, P. Tian, X. Hong and G.-Q. Lin, *J. Am. Chem. Soc.*, 2019, **141**, 12770. For the preparation of substrates **1l** and **1u**, see: (b) C.-Y. He, Q.-H. Li, X. Wang, F. Wang, P. Tian, and Lin, G.-Q. *Adv. Synth. Catal.*, 2020, **362**, 765. For the preparation of substrate **1z**, see: (c) J.-L. Zhang, D. Gao, Y.-X. Tan, C.-Y. He, P.-Y. Peng, G.-Q. Lin, Q.-H. Li and P. Tian, *Org. Lett.*, 2020, **22**, 3661. For the preparation of substrate **1ac**, see: (d) B. F. Sels, D. E. De Vos, and P. A. Jacobs, *Angew. Chem., Int. Ed.*, 2005, **44**, 310.

**(E)-4'-Bromo-1-((3-(4-bromophenyl)allyl)oxy)-[1,1'-biphenyl]-4(1H)-one (1v)**

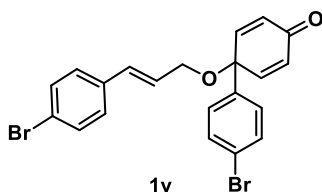

$R_f = 0.3$  (PE/EA = 10/1), yellow solid (200 mg, 22% yield), m.p. = 128 – 129 °C.

$^1\text{H NMR}$  (400 MHz,  $\text{CDCl}_3$ )  $\delta$  (ppm) 7.50 (d,  $J = 8.7$  Hz, 2H), 7.45 (d,  $J = 8.5$  Hz, 2H), 7.38 (d,  $J = 8.7$  Hz, 2H), 7.26 (d,  $J = 8.5$  Hz, 2H), 6.82 (d,  $J = 10.2$  Hz, 2H), 6.59 (d,  $J = 15.9$  Hz, 1H), 6.42 (d,  $J = 10.2$  Hz, 2H), 6.31 (dt,  $J = 15.9, 5.7$  Hz, 1H), 4.23 (dd,  $J = 5.8, 1.5$  Hz, 2H).

$^{13}\text{C NMR}$  (125 MHz,  $\text{CDCl}_3$ )  $\delta$  (ppm) 185.3, 149.9, 137.3, 135.5, 132.0, 131.8, 131.4, 130.1, 128.1, 127.6, 126.5, 122.7, 121.8, 76.2, 65.9.

**FT-MS:**  $[\text{M}+\text{H}]^{\oplus}$  459.0; **HRMS (DART):**  $[\text{M}+\text{H}]^{\oplus}$  calcd for  $\text{C}_{21}\text{H}_{17}^{79}\text{Br}_2\text{O}_2^{\oplus}$  458.9590, found 458.9584.

**(E)-4'-Bromo-1-((3-(p-tolyl)allyl)oxy)-[1,1'-biphenyl]-4(1H)-one (1w)**

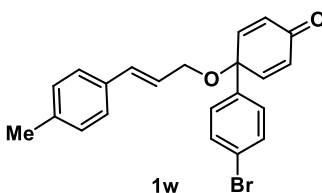

$R_f = 0.3$  (PE/EA = 10/1), yellow solid (140 mg, 18% yield), m.p. = 105 – 106 °C.

$^1\text{H NMR}$  (400 MHz,  $\text{CDCl}_3$ )  $\delta$  (ppm) 7.49 (d,  $J = 8.7$  Hz, 2H), 7.38 (d,  $J = 8.6$  Hz, 2H), 7.29 (d,  $J = 8.1$  Hz, 2H), 7.14 (d,  $J = 8.0$  Hz, 2H), 6.83 (d,  $J = 10.1$  Hz, 2H), 6.61 (d,  $J = 15.9$  Hz, 1H), 6.41 (d,  $J = 10.1$  Hz, 2H), 6.27 (dt,  $J = 15.9, 6.0$  Hz, 1H), 4.23 (dd,  $J = 6.0, 1.1$  Hz, 2H), 2.34 (s, 3H).

$^{13}\text{C NMR}$  (125 MHz,  $\text{CDCl}_3$ )  $\delta$  (ppm) 185.5, 150.8, 137.9, 137.4, 133.7, 132.8, 132.0, 130.0, 129.4, 127.7, 126.5, 124.6, 122.6, 76.2, 66.3, 21.3.

**FT-MS:**  $[\text{M}+\text{H}]^{\oplus}$  395.1; **HRMS (DART):**  $[\text{M}+\text{H}]^{\oplus}$  calcd for  $\text{C}_{22}\text{H}_{20}^{79}\text{BrO}_2^{\oplus}$  395.0641, found 395.0635.

**(E)-1-((3-(Naphthalen-2-yl)allyl)oxy)-[1,1'-biphenyl]-4(1H)-one (1x)**

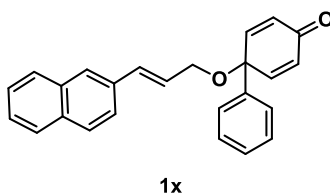

$R_f = 0.3$  (PE/EA = 15/1), yellow oil (152 mg, 22% yield).

**<sup>1</sup>H NMR** (400 MHz, CDCl<sub>3</sub>) δ (ppm) 7.84 – 7.74 (m, 4H), 7.62 (d, *J* = 8.4 Hz, 1H), 7.54 (d, *J* = 7.4 Hz, 2H), 7.47 (d, *J* = 5.0 Hz, 2H), 7.38 (dd, *J* = 15.7, 8.0 Hz, 3H), 6.92 (d, *J* = 9.9 Hz, 2H), 6.83 (d, *J* = 16.1 Hz, 1H), 6.52 – 6.41 (m, 3H), 4.32 (d, *J* = 5.3 Hz, 2H).

**<sup>13</sup>C NMR** (125 MHz, CDCl<sub>3</sub>) δ (ppm) 185.7, 150.7, 138.2, 134.1, 133.6, 133.2, 132.5, 129.8, 128.9, 128.5, 128.4, 128.1, 127.8, 126.7, 126.4, 126.4, 126.1, 125.9, 123.6, 76.6, 66.1.

**FT-MS:** [M+H]<sup>⊕</sup> 353.2; **HRMS (DART):** [M+H]<sup>⊕</sup> calcd for C<sub>25</sub>H<sub>21</sub>O<sub>2</sub><sup>⊕</sup> 353.1536, found 353.1529.

**(*E*)-4'-Bromo-1-((3-(4,4,5,5-tetramethyl-1,3,2-dioxaborolan-2-yl)allyl)oxy)-[1,1'-biphenyl]-4(1*H*)-one (1y)**

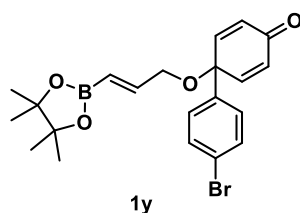

R<sub>f</sub> = 0.5 (PE/EA = 5/1), yellow oil (150 mg, 17% yield).

**<sup>1</sup>H NMR** (400 MHz, CDCl<sub>3</sub>) δ (ppm) 7.45 (d, *J* = 8.5 Hz, 2H), 7.35 (d, *J* = 8.5 Hz, 2H), 6.74 (d, *J* = 10.0 Hz, 2H), 6.66 (dt, *J* = 18.2, 4.0 Hz, 1H), 6.36 (d, *J* = 10.0 Hz, 2H), 5.83 (d, *J* = 18.1 Hz, 1H), 4.13 (d, *J* = 2.1 Hz, 2H), 1.27 (s, 12H).

**<sup>13</sup>C NMR** (150 MHz, CDCl<sub>3</sub>) δ (ppm) 185.3, 149.9, 148.5, 137.2, 132.0, 130.1, 127.7, 122.6, 83.5, 76.1, 66.5, 24.9.

**FT-MS:** [M+H]<sup>⊕</sup> 430.1; **HRMS (DART):** [M+H]<sup>⊕</sup> calcd for C<sub>21</sub>H<sub>25</sub><sup>79</sup>Br<sup>10</sup>BO<sub>4</sub><sup>⊕</sup> 430.1060, found 430.1053.

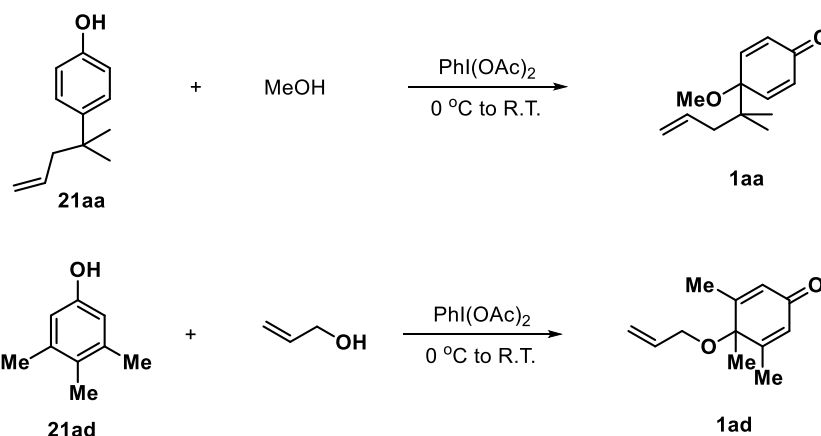

**General procedure for preparation of substrates 1aa and 1ad:** A well-stirred solution of substituted phenol **21aa**<sup>[2]</sup> or **21ad** (1.0 eq) in alcohol (5.0 eq) was cooled to 0 °C and treated with phenyliodine (III) diacetate (PIDA, 1.5 eq) in several portions. The resulting mixture was warmed

[2] For the preparation of substrate **21aa**, see: J. A. Cella, *J. Org. Chem.*, 2002, **47**, 2125.



to room temperature and stirred overnight. Then it was diluted with water and extracted with dichloroethane. The combined organic phases were washed with brine, dried over anhydrous Na<sub>2</sub>SO<sub>4</sub> and concentrated under reduced pressure. The residue was purified by flash column chromatography using petroleum ether/ethyl acetate eluent to afford the desired product **1aa** or **1ad**.

#### 4-Methoxy-4-(2-methylpent-4-en-2-yl)cyclohexa-2,5-dien-1-one (**1aa**)

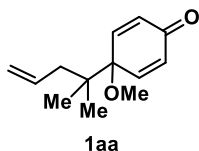

R<sub>f</sub> = 0.5 (PE/EA = 9/1), colorless oil (300 mg, 29% yield).

<sup>1</sup>H NMR (400 MHz, CDCl<sub>3</sub>) δ (ppm) 6.90 (d, *J* = 10.5 Hz, 2H), 6.42 (d, *J* = 10.5 Hz, 2H), 5.78 (ddt, *J* = 17.5, 10.1, 7.4 Hz, 1H), 5.07 – 4.97 (m, 2H), 3.20 (s, 3H), 2.15 (d, *J* = 7.4 Hz, 2H), 0.97 (s, 6H).

<sup>13</sup>C NMR (100 MHz, CDCl<sub>3</sub>) δ (ppm) 185.2, 150.4, 134.8, 132.5, 117.8, 80.1, 53.1, 42.4, 41.9, 22.1.

ESI-MS: [M+H]<sup>+</sup> 207.1; HRMS (ESI): [M+H]<sup>+</sup> calcd for C<sub>13</sub>H<sub>19</sub>O<sub>2</sub><sup>+</sup> 207.1380, found 207.1379.

#### 4-(Allyloxy)-3,4,5-trimethylcyclohexa-2,5-dien-1-one (**1ad**)

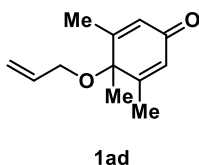

R<sub>f</sub> = 0.5 (PE/EA = 9/1), colorless oil (38% yield).

<sup>1</sup>H NMR (400 MHz, CDCl<sub>3</sub>) δ (ppm) 6.17 (s, 2H), 5.87 (ddt, *J* = 17.1, 10.6, 5.4 Hz, 1H), 5.29 (dd, *J* = 17.2, 1.6 Hz, 1H), 5.17 (dd, *J* = 10.4, 1.4 Hz, 1H), 3.53 (dt, *J* = 5.4, 1.4 Hz, 2H), 2.02 (s, 6H), 1.44 (s, 3H).

<sup>13</sup>C NMR (100 MHz, CDCl<sub>3</sub>) δ (ppm) 185.3, 161.0, 134.0, 129.1, 117.1, 76.7, 65.9, 25.1, 18.0.

ESI-MS: [M+H]<sup>+</sup> 193.2; HRMS (DART): [M+H]<sup>+</sup> calcd for C<sub>12</sub>H<sub>17</sub>O<sub>2</sub><sup>+</sup> 193.1223, found 193.1221.

### 3. Substrate scope of cyclohexadienone-tethered alkenes

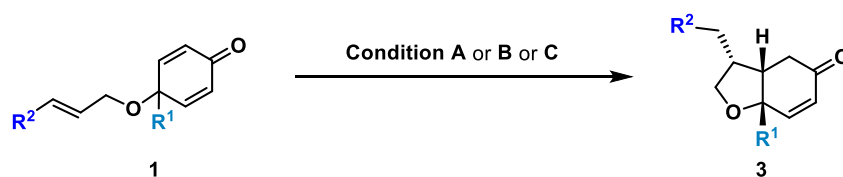

**Condition A:** A dried Schlenk flask was charged with **C3** (5.66 mg, 5 mol%), *t*-BuONa (2.0 mg, 10 mol%), and substrate **1** (if **1** is a solid, 0.2 mmol, 1.0 equiv), backfilled with argon. Then anhydrous DCE (2 mL), Et<sub>3</sub>SiH (0.3 mmol, 1.5 equiv) and substrate **1** (if **1** is a liquid, 0.2 mmol, 1.0 equiv) were added. After the mixture was stirred at 40 °C for 10 h, the reaction mixture was cooled to room temperature. Then NH<sub>4</sub>F (0.5M in MeOH) was added to quench the reaction and stirred for 10 min. Finally, the reaction mixture was filtered, washed with EtOAc (10 mL × 3) and concentrated in vacuo. The residue was purified by flash silica gel chromatography to afford the desired product **3**.

**Condition B:** A dried Schlenk flask was charged with **C3** (5.66 mg, 5 mol%) and substrate **1** (if **1** is a solid, 0.2 mmol, 1.0 equiv), backfilled with argon. Then anhydrous DCE (2 mL), HBpin (0.5 mmol, 2.5 equiv) and substrate **1** (if **1** is a liquid, 0.2 mmol, 1.0 equiv) were added. After the mixture was stirred at room temperature for 10 h. Then, the reaction mixture was filtered, washed with EtOAc (10 mL × 3) and concentrated in vacuo. The residue was purified by flash silica gel chromatography to afford the desired product **3**.

**Condition C:** A dried Schlenk flask was charged with **C3** (2.8 mg, 5 mol%), *t*-BuONa (1.0 mg, 10 mol%), and substrate **1** (if **1** is a solid, 0.1 mmol, 1.0 equiv), backfilled with argon. Then anhydrous DCE (1 mL), Et<sub>3</sub>SiH (0.15 mmol, 1.5 equiv) and substrate **1** (if **1** is a liquid, 0.1 mmol, 1.0 equiv) were added. After the mixture was stirred at 50 °C for 2 h, the reaction mixture was cooled to room temperature. Then NH<sub>4</sub>F (0.5M in MeOH) was added to quench the reaction and stirred for 10 min. Finally, the reaction mixture was filtered, washed with EtOAc (10 mL × 3) and concentrated in vacuo. The residue was purified by flash silica gel chromatography to afford the desired product **3**.

**(3*R*,3*aS*,7*aS*)-3,7*a*-Dimethyl-2,3,3*a*,7*a*-tetrahydrobenzofuran-5(4*H*)-one (3*a*)**

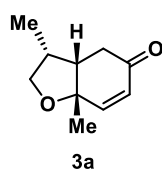

**Condition A**,  $R_f = 0.25$  (PE/EA = 10/1), light yellow oil (32 mg, 96% yield).

<sup>1</sup>H NMR (400 MHz, CDCl<sub>3</sub>)  $\delta$  (ppm) 6.62 (d,  $J = 10.3$  Hz, 1H), 5.98 (d,  $J = 10.3$  Hz, 1H), 4.08 (dd,  $J = 8.7, 7.5$  Hz, 1H), 3.37 (dd,  $J = 8.7, 7.4$  Hz, 1H), 2.65 – 2.48 (m, 4H), 1.46 (s, 3H), 0.90 (d,  $J = 7.1$  Hz, 3H).

<sup>13</sup>C NMR (100 MHz, CDCl<sub>3</sub>)  $\delta$  (ppm) 198.5, 152.6, 129.0, 78.9, 73.6, 45.6, 36.7, 35.7, 25.8, 13.8.

**EI-MS:**  $[M]^+$  166; **HRMS (EI):**  $[M]^+$  calcd for C<sub>11</sub>H<sub>14</sub>O<sub>2</sub><sup>+</sup> 166.0994, found 166.0997.

**Specific Rotation:**  $[\alpha]_D^{25.0}$  78.5 ( $c$  1.9, CHCl<sub>3</sub>) for 94% *ee*.

**Chiral HPLC analysis:** Phenomenex Lux 5u Cellulose-2 (PC-2) (250 mm); detected at 214 nm; *n*-hexane/*i*-propanol = 95/5; flow rate = 0.7 mL/min; Retention time: 16.0 min (major), 14.1 min (minor).

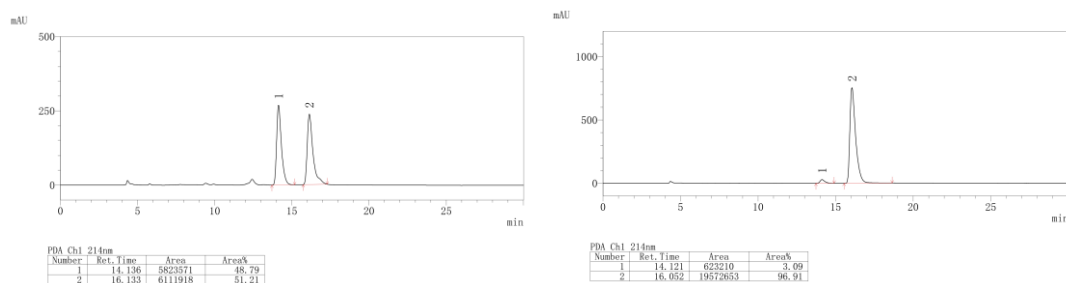

**(3*R*,3*aS*,7*aS*)-7*a*-Ethyl-3-methyl-2,3,3*a*,7*a*-tetrahydrobenzofuran-5(4*H*)-one (3b)**

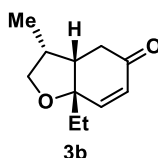

**Condition A**,  $R_f = 0.3$  (PE/EA = 15/1), colorless oil (33.72 mg, 94% yield).

$^1\text{H NMR}$  (400 MHz,  $\text{CDCl}_3$ )  $\delta$  (ppm) 6.62 (dd,  $J = 10.4, 0.7$  Hz, 1H), 6.04 (d,  $J = 10.4$  Hz, 1H), 4.01 (dd,  $J = 8.6, 6.9$  Hz, 1H), 3.38 (dd,  $J = 8.7, 6.4$  Hz, 1H), 2.62 – 2.47 (m, 4H), 1.85 – 1.68 (m, 2H), 0.99 (t,  $J = 7.6$  Hz, 3H), 0.90 (d,  $J = 6.8$  Hz, 3H).

$^{13}\text{C NMR}$  (100 MHz,  $\text{CDCl}_3$ )  $\delta$  (ppm) 198.8, 151.8, 129.7, 81.4, 73.3, 43.0, 37.2, 36.1, 32.3, 13.8, 8.4.

**EI-MS:**  $[\text{M}]^{\oplus} 180$ ; **HRMS (EI):**  $[\text{M}]^{\oplus}$  calcd for  $\text{C}_{11}\text{H}_{16}\text{O}_2^{\oplus}$  180.1150, found 180.1147.

**Specific Rotation:**  $[\alpha]_{\text{D}}^{25.0} 91.3$  ( $c$  1.57,  $\text{CHCl}_3$ ) for 93% *ee*.

**Chiral HPLC analysis:** Phenomenex Lux 5u Cellulose-2 (PC-2) (250 mm); detected at 214 nm; *n*-hexane/*i*-propanol = 95/5; flow rate = 0.7 mL/min; Retention time: 14.8 min (major), 13.1 min (minor).

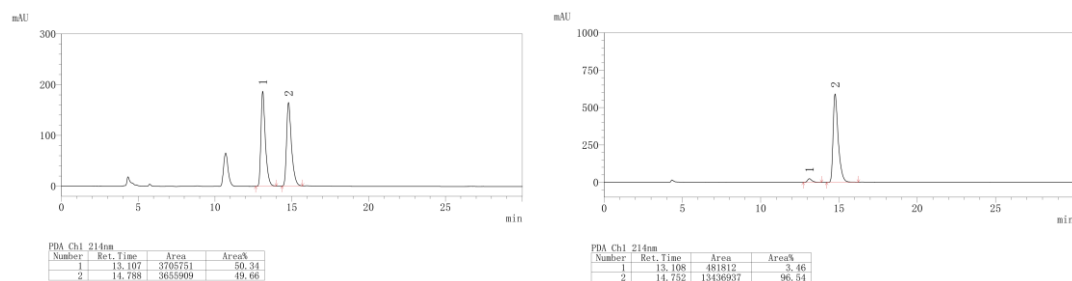

**(3*R*,3*aS*,7*aS*)-7*a*-Isopropyl-3-methyl-2,3,3*a*,7*a*-tetrahydrobenzofuran-5(4*H*)-one (3c)**

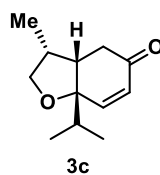

**Condition A**,  $R_f = 0.3$  (PE/EA = 15/1), colorless oil (33.2 mg, 86% yield).

$^1\text{H NMR}$  (400 MHz,  $\text{CDCl}_3$ )  $\delta$  (ppm) 6.61 (d,  $J = 10.4$  Hz, 1H), 6.11 (d,  $J = 10.4$  Hz, 1H), 3.93 (dd,  $J = 8.5, 6.8$  Hz, 1H), 3.35 (dd,  $J = 8.5, 6.5$  Hz, 1H), 2.70 – 2.42 (m, 4H), 2.04 – 1.93 (m, 1H), 1.06 – 0.94 (m, 6H), 0.89 (d,  $J = 7.2$  Hz, 3H).

$^{13}\text{C NMR}$  (100 MHz,  $\text{CDCl}_3$ )  $\delta$  (ppm) 199.0, 150.5, 130.3, 83.4, 72.8, 40.9, 38.2, 37.1, 36.8, 17.7, 17.0, 13.8.

**EI-MS**:  $[\text{M}]^{\oplus}$  194; **HRMS (EI)**:  $[\text{M}]^{\oplus}$  calcd for  $\text{C}_{12}\text{H}_{18}\text{O}_2^{\oplus}$  194.1307, found 194.1314.

**Specific Rotation**:  $[\alpha]_{\text{D}}^{25.0}$  89.2 ( $c$  1.35,  $\text{CHCl}_3$ ) for 91% *ee*.

**Chiral HPLC analysis**: Phenomenex Lux 5u Cellulose-2 (PC-2) (250 mm); detected at 214 nm; *n*-hexane/*i*-propanol = 95/5; flow rate = 0.7 mL/min; Retention time: 12.9 min (major), 11.6 min (minor).

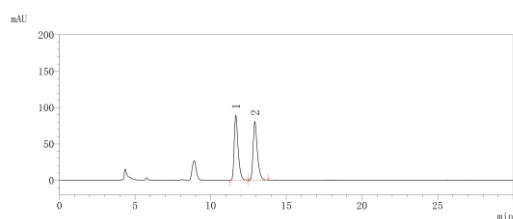

| Number | Ret. Time | Area    | Area% |
|--------|-----------|---------|-------|
| 1      | 11.490    | 1577575 | 50.42 |
| 2      | 12.918    | 1551385 | 49.58 |

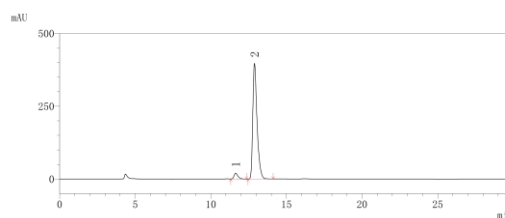

| Number | Ret. Time | Area    | Area% |
|--------|-----------|---------|-------|
| 1      | 11.492    | 328610  | 4.11  |
| 2      | 12.887    | 7766386 | 95.89 |

**(3R,3aS,7aS)-7a-(Tert-butyl)-3-methyl-2,3,3a,7a-tetrahydrobenzofuran-5(4H)-one (3d)**

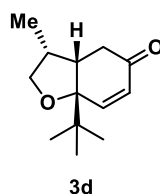

**Condition A**,  $R_f = 0.5$  (PE/EA = 10/1), colorless oil (36 mg, 87% yield).

$^1\text{H NMR}$  (400 MHz,  $\text{CDCl}_3$ )  $\delta$  (ppm) 6.75 (dd,  $J = 10.6, 1.4$  Hz, 1H), 6.11 (dd,  $J = 10.6, 0.4$  Hz, 1H), 3.89 (dd,  $J = 8.6, 6.5$  Hz, 1H), 3.33 (dd,  $J = 8.6, 5.7$  Hz, 1H), 2.92 – 2.83 (m, 1H), 2.63 – 2.50 (m, 2H), 2.49 – 2.36 (m, 1H), 1.04 (s, 9H), 0.88 (d,  $J = 7.3$  Hz, 3H).

$^{13}\text{C NMR}$  (100 MHz,  $\text{CDCl}_3$ )  $\delta$  (ppm) 198.7, 150.7, 130.0, 84.8, 73.1, 39.2, 38.6, 38.6, 37.3, 25.4, 14.2.

**EI-MS**:  $[\text{M}]^{\oplus}$  208; **HRMS (EI)**:  $[\text{M}]^{\oplus}$  calcd for  $\text{C}_{13}\text{H}_{20}\text{O}_2^{\oplus}$  208.1463, found 208.1457.

**Specific Rotation**:  $[\alpha]_{\text{D}}^{25.0}$  103.2 ( $c$  1.55,  $\text{CHCl}_3$ ) for 89% *ee*.

**Chiral HPLC analysis:** Phenomenex Lux 5u Cellulose-2 (PC-2) (250 mm); detected at 214 nm; *n*-hexane/*i*-propanol = 95/5; flow rate = 0.7 mL/min; Retention time: 11.4 min (major), 10.6 min (minor).

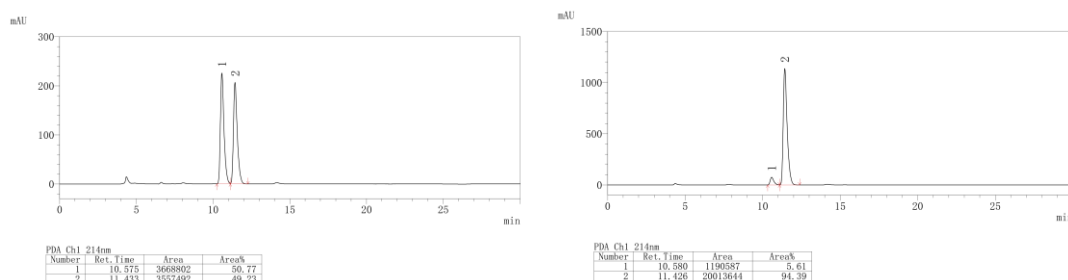

**(3*R*,3*aS*,7*aS*)-7*a*-Cyclohexyl-3-methyl-2,3,3*a*,7*a*-tetrahydrobenzofuran-5(4*H*)-one (3e)**

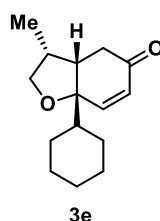

**Condition A**,  $R_f = 0.35$  (PE/EA = 15/1), colorless oil (42.8 mg, 91% yield).

**<sup>1</sup>H NMR** (400 MHz, CDCl<sub>3</sub>)  $\delta$  (ppm) 6.59 (dd,  $J = 10.4, 1.1$  Hz, 1H), 6.08 (d,  $J = 10.4$  Hz, 1H), 3.91 (dd,  $J = 8.6, 6.6$  Hz, 1H), 3.35 (dd,  $J = 8.6, 6.2$  Hz, 1H), 2.73 – 2.66 (m, 1H), 2.60 – 2.41 (m, 3H), 1.91 – 1.75 (m, 4H), 1.69 – 1.58 (m, 2H), 1.33 – 1.21 (m, 2H), 1.18 – 1.00 (m, 3H), 0.88 (d,  $J = 7.2$  Hz, 3H).

**<sup>13</sup>C NMR** (100 MHz, CDCl<sub>3</sub>)  $\delta$  (ppm) 199.0, 151.1, 129.9, 83.0, 72.8, 47.3, 41.1, 38.2, 37.1, 27.9, 27.1, 26.6, 26.5, 26.4, 13.8.

**EI-MS:**  $[M]^+$  234; **HRMS (EI):**  $[M]^+$  calcd for C<sub>15</sub>H<sub>22</sub>O<sub>2</sub><sup>+</sup> 234.1620, found 234.1629.

**Specific Rotation:**  $[\alpha]_D^{25.0}$  40.3 (*c* 1.9, CHCl<sub>3</sub>) for 93% *ee*.

**Chiral HPLC analysis:** Phenomenex Lux 5u Cellulose-2 (PC-2) Column (250 mm); detected at 214 nm; *n*-hexane/*i*-propanol = 95/5; flow rate = 0.7 mL/min; Retention time: 14.1 min (major), 12.1 min (minor).

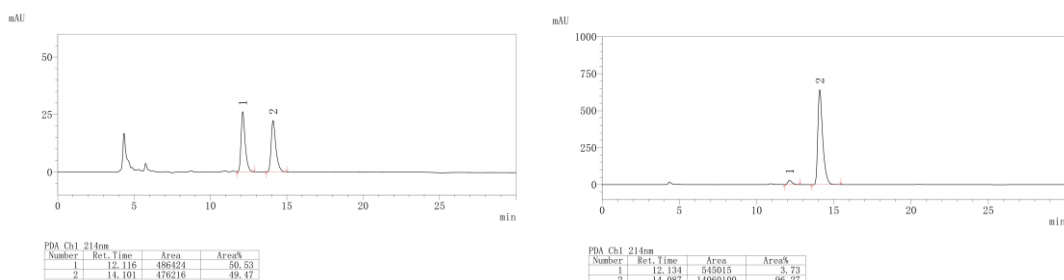

**(3*R*,3*aS*,7*aS*)-7*a*-Benzyl-3-methyl-2,3,3*a*,7*a*-tetrahydrobenzofuran-5(4*H*)-one (3f)**

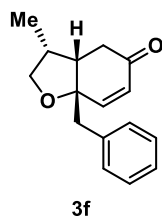

**Condition A**,  $R_f = 0.35$  (PE/EA = 12/1), colorless oil (46 mg, 95% yield).

$^1\text{H NMR}$  (400 MHz,  $\text{CDCl}_3$ )  $\delta$  (ppm) 7.31 – 7.20 (m, 5H), 6.58 (dd,  $J = 10.4, 1.3$  Hz, 1H), 5.99 (dd,  $J = 10.4, 0.6$  Hz, 1H), 3.96 (dd,  $J = 8.7, 7.0$  Hz, 1H), 3.37 (dd,  $J = 8.7, 6.1$  Hz, 1H), 3.01 (s, 2H), 2.67 – 2.58 (m, 1H), 2.51 – 2.39 (m, 2H), 2.16 (dd,  $J = 17.5, 7.1$  Hz, 1H), 0.86 (d,  $J = 7.2$  Hz, 3H).

$^{13}\text{C NMR}$  (100 MHz,  $\text{CDCl}_3$ )  $\delta$  (ppm) 198.5, 151.6, 135.8, 130.4, 129.6, 128.3, 127.0, 81.1, 73.3, 45.6, 43.3, 37.2, 35.9, 14.2.

**EI-MS**:  $[M]^+$  242; **HRMS (EI)**:  $[M]^+$  calcd for  $\text{C}_{16}\text{H}_{18}\text{O}_2^+$  242.1307, found 242.1302.

**Specific Rotation**:  $[\alpha]_D^{25.0}$  35.2 ( $c$  2.05,  $\text{CHCl}_3$ ) for 94% *ee*.

**Chiral HPLC analysis**: Phenomenex Lux 5u Cellulose-2 (PC-2) (250 mm); detected at 214 nm; *n*-hexane/*i*-propanol = 95/5; flow rate = 0.7 mL/min; Retention time: 17.2 min (major), 15.4 min (minor).

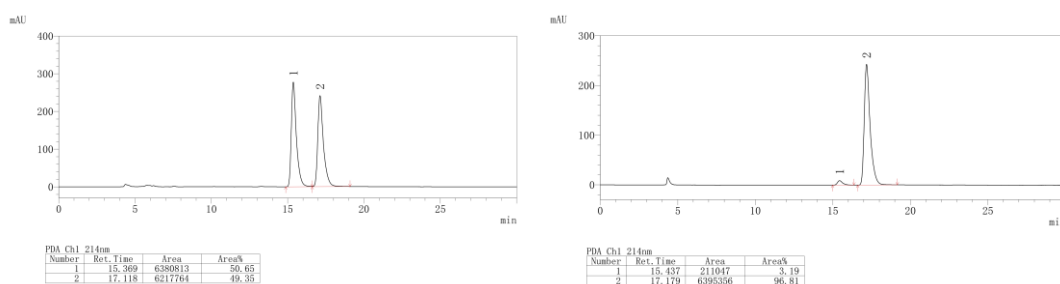

### (3R,3aS,7aS)-3-Methyl-7a-vinyl-2,3,3a,7a-tetrahydrobenzofuran-5(4H)-one (3g)

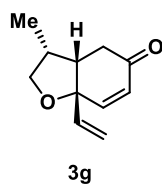

**Condition A**,  $R_f = 0.3$  (PE/EA = 15/1), colorless oil (32.5 mg, 91% yield).

$^1\text{H NMR}$  (400 MHz,  $\text{CDCl}_3$ )  $\delta$  (ppm) 6.56 (d,  $J = 10.3$  Hz, 1H), 6.09 (d,  $J = 10.2$  Hz, 1H), 5.93 (dd,  $J = 17.4, 10.6$  Hz, 1H), 5.31 (dd,  $J = 17.4, 0.8$  Hz, 1H), 5.24 (dd,  $J = 10.6, 0.7$  Hz, 1H), 4.13 (dd,  $J = 8.5, 7.3$  Hz, 1H), 3.51 (dd,  $J = 8.6, 6.7$  Hz, 1H), 2.66 – 2.47 (m, 4H), 0.93 (d,  $J = 6.8$  Hz, 3H).

$^{13}\text{C NMR}$  (100 MHz,  $\text{CDCl}_3$ )  $\delta$  (ppm) 198.6, 149.2, 139.7, 130.1, 115.4, 81.4, 74.0, 45.3, 36.2, 35.0, 13.6.

**EI-MS**:  $[M]^+$  178; **HRMS (EI)**:  $[M]^+$  calcd for  $\text{C}_{11}\text{H}_{14}\text{O}_2^+$  178.0994, found 178.0997.

**Specific Rotation:**  $[\alpha]_D^{25.0}$  1.6 (*c* 1.07, CHCl<sub>3</sub>) for 94% *ee*.

**Chiral HPLC analysis:** Phenomenex Lux 5u Cellulose-2 (PC-2) (250 mm); detected at 214 nm; *n*-hexane/*i*-propanol = 95/5; flow rate = 0.7 mL/min; Retention time: 14.3 min (major), 12.7 min (minor).

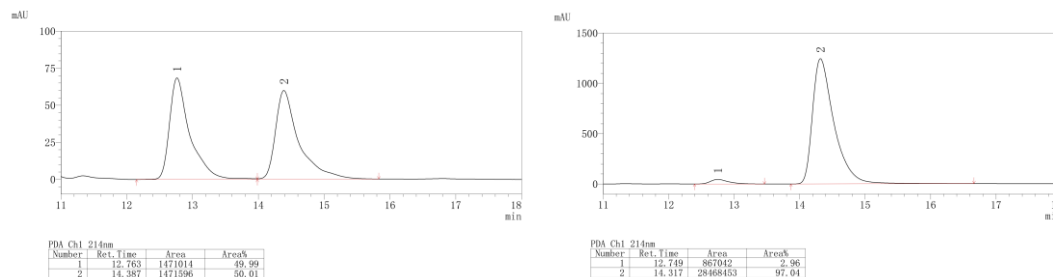

**(3*R*,3*aS*,7*aS*)-7*a*-(But-3-en-1-yl)-3-methyl-2,3,3*a*,7*a*-tetrahydrobenzofuran-5(4*H*)-one (3h)**

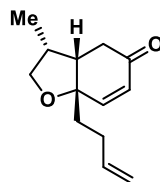

**3h**

**Condition A**, *R<sub>f</sub>* = 0.3 (PE/EA = 10/1), light yellow oil (39 mg, 95% yield).

**<sup>1</sup>H NMR** (400 MHz, CDCl<sub>3</sub>) δ (ppm) 6.65 (d, *J* = 10.4 Hz, 1H), 6.04 (d, *J* = 10.4 Hz, 1H), 5.83 (ddt, *J* = 16.7, 10.2, 6.5 Hz, 1H), 5.12 – 4.91 (m, 2H), 4.03 (dd, *J* = 8.4, 7.1 Hz, 1H), 3.38 (dd, *J* = 8.5, 6.6 Hz, 1H), 2.65 – 2.48 (m, 4H), 2.25 – 2.14 (m, 2H), 1.91 – 1.74 (m, 2H), 0.90 (d, *J* = 6.8 Hz, 3H).

**<sup>13</sup>C NMR** (100 MHz, CDCl<sub>3</sub>) δ (ppm) 198.6, 151.6, 137.9, 129.6, 115.0, 80.8, 73.3, 43.6, 38.6, 37.1, 35.9, 28.3, 13.9.

**EI-MS:** [M]<sup>+</sup> 206; **HRMS (EI):** [M]<sup>+</sup> calcd for C<sub>13</sub>H<sub>18</sub>O<sub>2</sub><sup>+</sup> 206.1307, found 206.1299.

**Specific Rotation:**  $[\alpha]_D^{25.0}$  40.3 (*c* 1.88, CHCl<sub>3</sub>) for 93% *ee*.

**Chiral HPLC analysis:** Chiralpak AS-H Column (250 mm); detected at 214 nm; *n*-hexane/*i*-propanol = 95/5; flow rate = 0.7 mL/min; Retention time: 10.0 min (major), 15.7 min (minor).

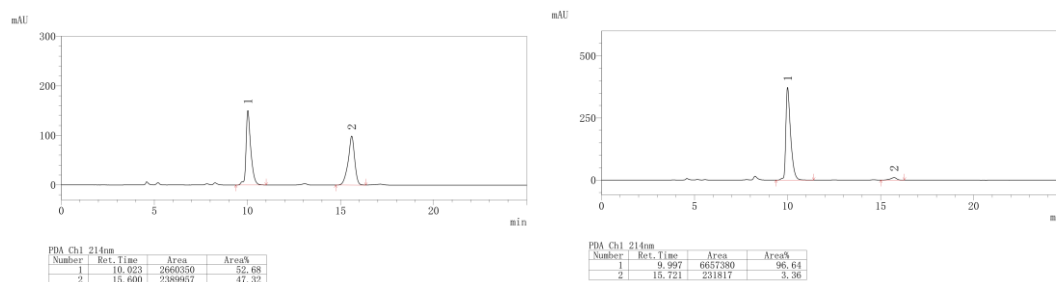

**(3*R*,3*aS*,7*aS*)-3-Methyl-7*a*-phenyl-2,3,3*a*,7*a*-tetrahydrobenzofuran-5(4*H*)-one**

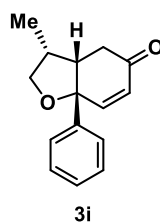

**Condition A**,  $R_f = 0.4$  (PE/EA = 20/1), colorless oil (42.5 mg, 93% yield).

**$^1\text{H NMR}$**  (400 MHz,  $\text{CDCl}_3$ )  $\delta$  (ppm) 7.42 – 7.34 (m, 4H), 7.32 – 7.27 (m, 1H), 6.63 (d,  $J = 10.2$  Hz, 1H), 6.16 (d,  $J = 10.2$  Hz, 1H), 4.29 (dd,  $J = 8.4, 7.7$  Hz, 1H), 3.75 – 3.69 (m, 1H), 2.78 (dd,  $J = 14.3, 7.0$  Hz, 1H), 2.61 – 2.52 (m, 3H), 0.95 (d,  $J = 7.1$  Hz, 3H).

**$^{13}\text{C NMR}$**  (100 MHz,  $\text{CDCl}_3$ )  $\delta$  (ppm) 199.0, 149.4, 143.8, 129.2, 128.7, 127.7, 125.0, 82.8, 74.2, 48.3, 36.4, 35.4, 12.9.

**EI-MS**:  $[\text{M}]^{\oplus} 228$ ; **HRMS (EI)**:  $[\text{M}]^{\oplus}$  calcd for  $\text{C}_{15}\text{H}_{16}\text{O}_2^{\oplus}$  228.1150, found 228.1151.

**Specific Rotation**:  $[\alpha]_{\text{D}}^{25.0} -108.9$  ( $c$  1.87,  $\text{CHCl}_3$ ) for 94% *ee*.

**Chiral HPLC analysis**: Phenomenex Lux 5u Cellulose-2 (PC-2) (250 mm); detected at 214 nm; *n*-hexane/*i*-propanol = 95/5; flow rate = 0.7 mL/min; Retention time: 17.1 min (major), 15.3 min (minor).

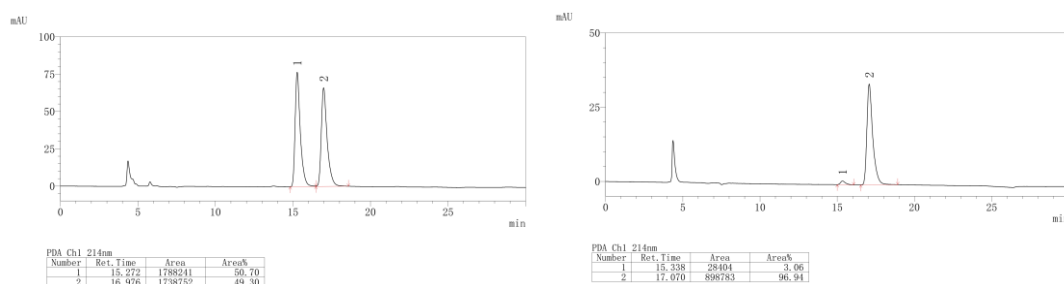

**(3*R*,3*aS*,7*aS*)-7*a*-(4-Bromophenyl)-3-methyl-2,3,3*a*,7*a*-tetrahydrobenzofuran-5(4*H*)-one (3j)**

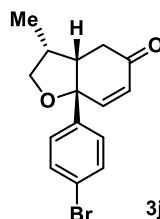

**Condition A**,  $R_f = 0.35$  (PE/EA = 15/1), colorless oil (56 mg, 92% yield).

**$^1\text{H NMR}$**  (400 MHz,  $\text{CDCl}_3$ )  $\delta$  (ppm) 7.50 (d,  $J = 8.0$  Hz, 2H), 7.28 (d,  $J = 8.0$  Hz, 2H), 6.58 (d,  $J = 10.2$  Hz, 1H), 6.17 (d,  $J = 10.2$  Hz, 1H), 4.27 (t,  $J = 8.1$  Hz, 1H), 3.74 – 3.68 (m, 1H), 2.73 (dd,  $J = 14.2, 7.0$  Hz, 1H), 2.62 – 2.49 (m, 3H), 0.95 (d,  $J = 7.1$  Hz, 3H).

**$^{13}\text{C NMR}$**  (100 MHz,  $\text{CDCl}_3$ )  $\delta$  (ppm) 198.6, 148.7, 142.9, 131.8, 129.4, 126.9, 121.8, 82.5, 74.2, 48.3, 36.4, 35.3, 12.8.



**EI-MS:**  $[M]^{\oplus}$  306; **HRMS (EI):**  $[M]^{\oplus}$  calcd for  $C_{15}H_{15}O_2^{79}Br^{\oplus}$  306.0255, found 306.0261.

**Specific Rotation:**  $[\alpha]_D^{25.0}$  -110.4 (*c* 2.7,  $CHCl_3$ ) for 94% *ee*.

**Chiral HPLC analysis:** Phenomenex Lux 5u Cellulose-2 (PC-2) (250 mm); detected at 214 nm; *n*-hexane/*i*-propanol = 95/5; flow rate = 0.7 mL/min; Retention time: 21.3 min (major), 18.9 min (minor).

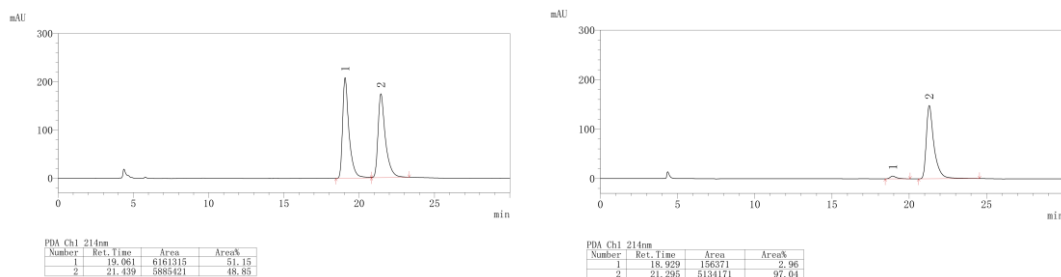

### 4-((3*R*,3*aS*,7*aS*)-3-Methyl-5-oxo-3,3*a*,4,5-tetrahydrobenzofuran-7*a*(2*H*)-yl)benzonitrile (**3k**)

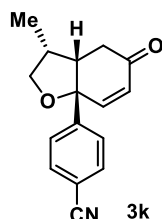

**Condition A,**  $R_f$  = 0.3 (PE/EA = 5/1), colorless oil (48 mg, 95% yield).

**$^1H$  NMR** (400 MHz,  $CDCl_3$ )  $\delta$  (ppm) 7.69 (d,  $J$  = 8.0 Hz, 2H), 7.55 (d,  $J$  = 8.0 Hz, 2H), 6.57 (d,  $J$  = 10.2 Hz, 1H), 6.21 (d,  $J$  = 10.2 Hz, 1H), 4.30 (t,  $J$  = 8.1 Hz, 1H), 3.79 – 3.73 (m, 1H), 2.79 – 2.72 (m, 1H), 2.64 – 2.52 (m, 3H), 0.97 (d,  $J$  = 7.1 Hz, 3H).

**$^{13}C$  NMR** (100 MHz,  $CDCl_3$ )  $\delta$  (ppm) 198.0, 149.2, 147.7, 132.5, 129.8, 125.9, 118.5, 111.7, 82.5, 74.3, 48.2, 36.5, 35.1, 12.7.

**EI-MS:**  $[M]^{\oplus}$  253; **HRMS (EI):**  $[M]^{\oplus}$  calcd for  $C_{16}H_{15}NO_2^{\oplus}$  253.1103, found 253.1098.

**Specific Rotation:**  $[\alpha]_D^{25.0}$  -129.1 (*c* 2.4,  $CHCl_3$ ) for 94% *ee*.

**Chiral HPLC analysis:** Phenomenex Lux 5u Cellulose-2 (PC-2) Column (250 mm); detected at 214 nm; *n*-hexane/*i*-propanol = 80/20; flow rate = 1.0 mL/min; Retention time: 26.1 min (major), 21.0 min (minor).

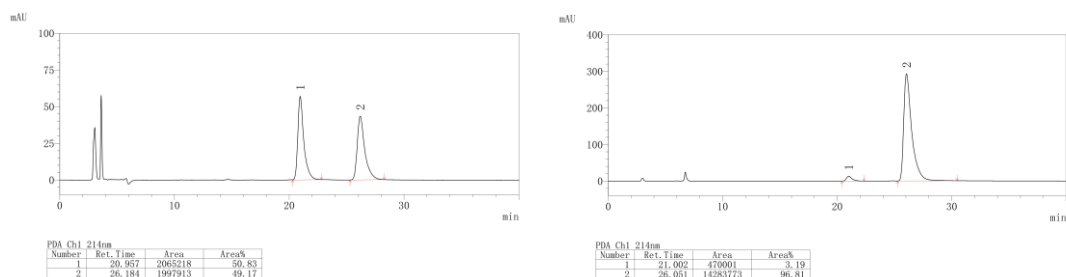

**(3R,3aS,7aS)-3-Methyl-7a-(4-oxocyclohexyl)-2,3,3a,7a-tetrahydrobenzofuran-5(4H)-one (3l)**

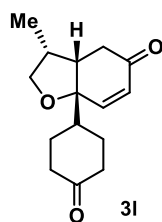

**Condition B**,  $R_f = 0.3$  (PE/EA = 5/2), light yellow oil (32.1mg, 65% yield).

$^1\text{H NMR}$  (400 MHz,  $\text{CDCl}_3$ )  $\delta$  (ppm) 6.61 (dd,  $J = 10.4, 1.1$  Hz, 1H), 6.12 (d,  $J = 10.3$  Hz, 1H), 3.96 (dd,  $J = 8.7, 6.7$  Hz, 1H), 3.39 (dd,  $J = 8.7, 6.4$  Hz, 1H), 2.76 – 2.68 (m, 1H), 2.64 – 2.30 (m, 7H), 2.27 – 2.18 (m, 2H), 2.16 – 2.07 (m, 1H), 1.67 – 1.50 (m, 2H), 0.91 (d,  $J = 7.2$  Hz, 3H).

$^{13}\text{C NMR}$  (100 MHz,  $\text{CDCl}_3$ )  $\delta$  (ppm) 210.7, 198.1, 149.6, 130.6, 82.3, 73.0, 45.4, 41.3, 40.9, 40.6, 38.1, 36.8, 27.5, 26.8, 13.7.

**EI-MS**:  $[\text{M}]^{\oplus} 248$ ; **HRMS (EI)**:  $[\text{M}]^{\oplus}$  calcd for  $\text{C}_{15}\text{H}_{20}\text{O}_3^{\oplus}$  248.1412, found 248.1416.

**Specific Rotation**:  $[\alpha]_D^{25.0} 27.7$  ( $c$  1.36,  $\text{CHCl}_3$ ) for 91% *ee*.

**Chiral HPLC analysis**: Chiralpak OD-H Column (250 mm); detected at 214 nm; *n*-hexane/*i*-propanol = 85/15; flow rate = 0.7 mL/min; Retention time: 35.0 min (major), 24.8 min (minor).

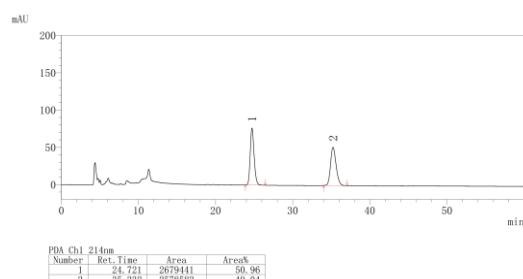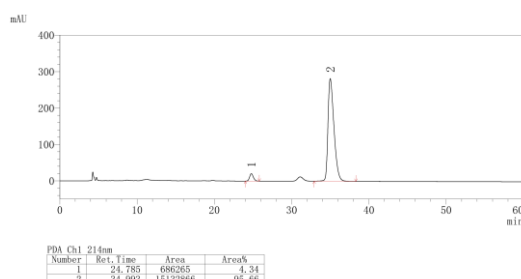

**Methyl 2-((3R,3aS,7aS)-3-methyl-5-oxo-3,3a,4,5-tetrahydrobenzofuran-7a(2H)-yl) acetate (3m)**

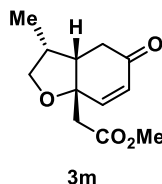

**Condition A**,  $R_f = 0.3$  (PE/EA = 4/1), colorless oil (30.5 mg, 68% yield).

$^1\text{H NMR}$  (400 MHz,  $\text{CDCl}_3$ )  $\delta$  (ppm) 6.75 (dd,  $J = 10.4, 1.0$  Hz, 1H), 6.05 (d,  $J = 10.4$  Hz, 1H), 4.05 (dd,  $J = 8.7, 7.2$  Hz, 1H), 3.69 (s, 3H), 3.43 (dd,  $J = 8.7, 6.9$  Hz, 1H), 2.92 – 2.85 (m, 1H), 2.76 (s, 2H), 2.65 – 2.52 (m, 3H), 0.92 (d,  $J = 7.2$  Hz, 3H).

$^{13}\text{C NMR}$  (100 MHz,  $\text{CDCl}_3$ )  $\delta$  (ppm) 198.2, 170.0, 149.4, 129.8, 78.9, 73.5, 52.0, 44.1, 43.8, 37.0, 35.6, 13.7.

**EI-MS:**  $[M]^{\oplus}$  224; **HRMS (EI):**  $[M]^{\oplus}$  calcd for  $C_{12}H_{16}O_4^{\oplus}$  224.1049, found 224.1041.

**Specific Rotation:**  $[\alpha]_D^{25.0}$  51.6 ( $c$  1.35,  $CHCl_3$ ) for 93% *ee*.

**Chiral HPLC analysis:** Phenomenex Lux 5u Cellulose-2 (PC-2) Column (250 mm); detected at 214 nm; *n*-hexane/*i*-propanol = 90/10; flow rate = 0.7 mL/min; Retention time: 27.1 min (major), 23.7 min (minor).

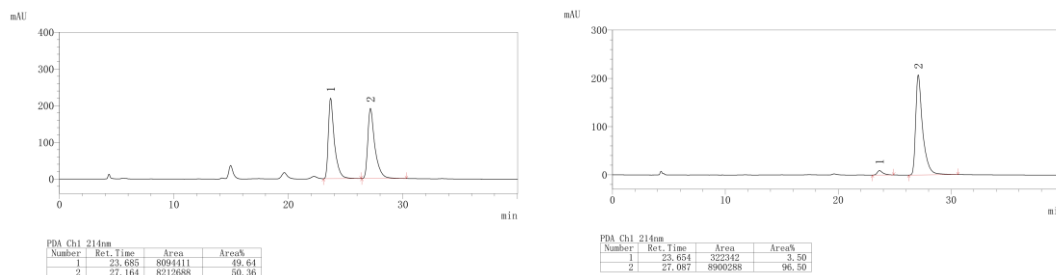

**Methyl 3-((3R,3aS,7aS)-3-methyl-5-oxo-3,3a,4,5-tetrahydrobenzofuran-7a(2H)-yl) propanoate (3n)**

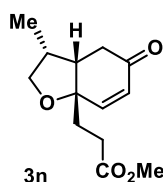

**Condition A,**  $R_f$  = 0.3 (PE/EA = 7/2), yellow oil (46.5 mg, 98% yield).

**$^1H$  NMR** (400 MHz,  $CDCl_3$ )  $\delta$  (ppm) 6.61 (d,  $J$  = 10.4 Hz, 1H), 6.03 (d,  $J$  = 10.4 Hz, 1H), 4.01 (dd,  $J$  = 8.6, 7.0 Hz, 1H), 3.69 (s, 3H), 3.38 (dd,  $J$  = 8.7, 6.1 Hz, 1H), 2.62 – 2.43 (m, 6H), 2.15 – 2.01 (m, 2H), 0.90 (d,  $J$  = 6.6 Hz, 3H).

**$^{13}C$  NMR** (100 MHz,  $CDCl_3$ )  $\delta$  (ppm) 198.1, 173.5, 150.6, 129.78, 80.0, 73.5, 51.8, 43.5, 36.9, 35.7, 33.8, 28.7, 13.8.

**EI-MS:**  $[M]^{\oplus}$  238; **HRMS (EI):**  $[M]^{\oplus}$  calcd for  $C_{13}H_{18}O_4^{\oplus}$  238.1205, found 238.1202.

**Specific Rotation:**  $[\alpha]_D^{24.9}$  50.2 ( $c$  2.02,  $CHCl_3$ ) for 93% *ee*.

**Chiral HPLC analysis:** Phenomenex Lux 5u Cellulose-2 (PC-2) (250 mm); detected at 214 nm; *n*-hexane/*i*-propanol = 80/20; flow rate = 0.7 mL/min; Retention time: 24.2 min (major), 19.2 min (minor).

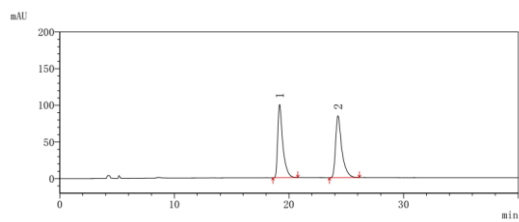

| Number | Ret. Time | Area    | Area% |
|--------|-----------|---------|-------|
| 1      | 19.177    | 3076948 | 49.17 |
| 2      | 24.273    | 3180792 | 50.83 |

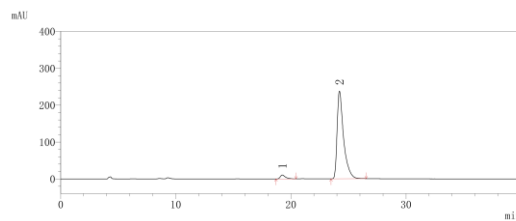

| Number | Ret. Time | Area    | Area% |
|--------|-----------|---------|-------|
| 1      | 19.250    | 325041  | 3.44  |
| 2      | 24.217    | 9242569 | 96.56 |

### 2-((3*R*,3*aS*,7*aS*)-3-Methyl-5-oxo-3,3*a*,4,5-tetrahydrobenzofuran-7*a*(2*H*)-yl)ethyl acetate (**3o**)

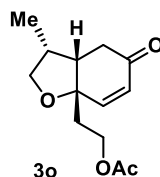

**Condition A**,  $R_f = 0.35$  (PE/EA = 4/1), yellow oil (40.2 mg, 84% yield).

$^1\text{H NMR}$  (400 MHz,  $\text{CDCl}_3$ )  $\delta$  (ppm) 6.64 (dd,  $J = 10.4, 1.1$  Hz, 1H), 6.04 (d,  $J = 10.4$  Hz, 1H), 4.32 – 4.17 (m, 2H), 4.04 (dd,  $J = 8.7, 7.2$  Hz, 1H), 3.37 (dd,  $J = 8.8, 6.9$  Hz, 1H), 2.69 – 2.51 (m, 4H), 2.17 – 2.01 (m, 5H), 0.91 (d,  $J = 7.1$  Hz, 3H).

$^{13}\text{C NMR}$  (100 MHz,  $\text{CDCl}_3$ )  $\delta$  (ppm) 198.2, 170.9, 150.9, 129.8, 79.8, 73.4, 60.3, 44.0, 37.9, 36.9, 35.6, 21.0, 13.9.

**EI-MS**:  $[\text{M}]^+$  238; **HRMS (EI)**:  $[\text{M}]^+$  calcd for  $\text{C}_{13}\text{H}_{18}\text{O}_4^+$  238.1205, found 238.1205.

**Specific Rotation**:  $[\alpha]_D^{25.0}$  64.3 ( $c$  1.67,  $\text{CHCl}_3$ ) for 94% *ee*.

**Chiral HPLC analysis**: Chiralpak OD-H Column (250 mm); detected at 214 nm; *n*-hexane/*i*-propanol = 95/5; flow rate = 0.7 mL/min; Retention time: 20.1 min (major), 22.3 min (minor).

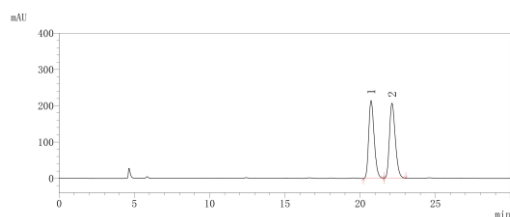

| Number | Ret. Time | Area    | Area% |
|--------|-----------|---------|-------|
| 1      | 20.728    | 5368887 | 49.23 |
| 2      | 22.116    | 5554835 | 50.77 |

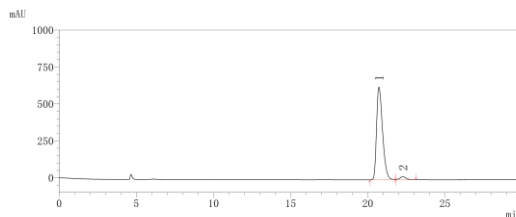

| Number | Ret. Time | Area     | Area% |
|--------|-----------|----------|-------|
| 1      | 20.728    | 16857004 | 97.02 |
| 2      | 22.275    | 517839   | 2.98  |

### (3*R*,3*aS*,7*aS*)-7*a*-(2-((*Tert*-butyldimethylsilyloxy)ethyl)-3-methyl-2,3,3*a*,7*a*-tetrahydrobenzofuran-5(4*H*)-one (**3p**)

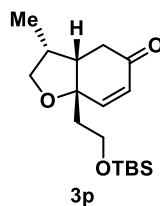

**Condition A**,  $R_f = 0.3$  (PE/EA = 8/1), colorless oil (55.2 mg, 89% yield).

**$^1\text{H}$  NMR** (400 MHz,  $\text{CDCl}_3$ )  $\delta$  (ppm) 6.64 (dd,  $J = 10.4, 1.0$  Hz, 1H), 6.02 (d,  $J = 10.4$  Hz, 1H), 4.03 (dd,  $J = 8.6, 7.4$  Hz, 1H), 3.85 – 3.73 (m, 2H), 3.37 (dd,  $J = 8.6, 7.1$  Hz, 1H), 2.81 – 2.72 (m, 1H), 2.69 – 2.50 (m, 3H), 2.07 – 1.89 (m, 2H), 0.94 – 0.86 (m, 12H), 0.05 (s, 6H).

**$^{13}\text{C}$  NMR** (100 MHz,  $\text{CDCl}_3$ )  $\delta$  (ppm) 198.9, 151.9, 129.4, 80.5, 73.3, 58.8, 43.9, 42.2, 37.0, 35.8, 25.9, 18.2, 14.0, -5.4.

**EI-MS**:  $[\text{M}]^{\oplus}$  310; **HRMS (EI)**:  $[\text{M}]^{\oplus}$  calcd for  $\text{C}_{17}\text{H}_{30}\text{O}_3\text{Si}^{\oplus}$  310.1964, found 310.1964.

**Specific Rotation**:  $[\alpha]_{\text{D}}^{25.0}$  41.3 ( $c$  2.38,  $\text{CHCl}_3$ ) for 94% *ee*.

**Chiral HPLC analysis**: Chiralpak OD-H Column (250 mm); detected at 214 nm; *n*-hexane/*i*-propanol = 98/2; flow rate = 0.4 mL/min; Retention time: 14.5 min (major), 13.4 min (minor).

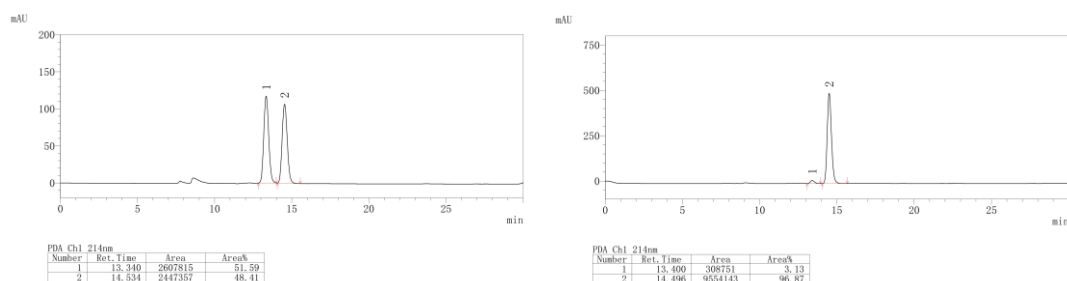

**Tert-butyl (2-((3*R*,3*aS*,7*aS*)-3-methyl-5-oxo-3,3*a*,4,5-tetrahydrobenzofuran-7*a*(2*H*)-yl)ethyl) carbamate (3q)**

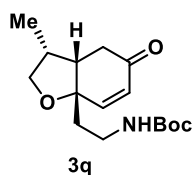

**Condition A**,  $R_f = 0.3$  (PE/EA = 3/1), yellow oil (20 mg, 68% yield, 0.1 mmol scale).

**$^1\text{H}$  NMR** (400 MHz,  $\text{CDCl}_3$ )  $\delta$  (ppm) 6.66 (d,  $J = 10.3$  Hz, 1H), 6.03 (d,  $J = 10.4$  Hz, 1H), 5.06 (s, 1H), 4.09 – 4.01 (m, 1H), 3.41 – 3.21 (m, 3H), 2.69 – 2.45 (m, 4H), 2.04 – 1.85 (m, 2H), 1.45 (s, 9H), 0.90 (d,  $J = 7.0$  Hz, 3H).

**$^{13}\text{C}$  NMR** (100 MHz,  $\text{CDCl}_3$ )  $\delta$  (ppm) 198.1, 155.9, 150.9, 129.9, 80.6, 79.4, 73.6, 44.1, 38.5, 36.6, 36.4, 35.7, 28.5, 14.1.

**EI-MS**:  $[\text{M}]^{\oplus}$  295; **HRMS (EI)**:  $[\text{M}]^{\oplus}$  calcd for  $\text{C}_{16}\text{H}_{25}\text{NO}_4^{\oplus}$  295.1784, found 295.1788.

**Specific Rotation**:  $[\alpha]_{\text{D}}^{25.0}$  33.0 ( $c$  1.0,  $\text{CHCl}_3$ ) for 94% *ee*.

**Chiral HPLC analysis:** Phenomenex Lux 5u Cellulose-2 (PC-2) (250 mm); detected at 214 nm; *n*-hexane/*i*-propanol = 80/20; flow rate = 1.0 mL/min; Retention time: 16.4 min (major), 13.9 min (minor).

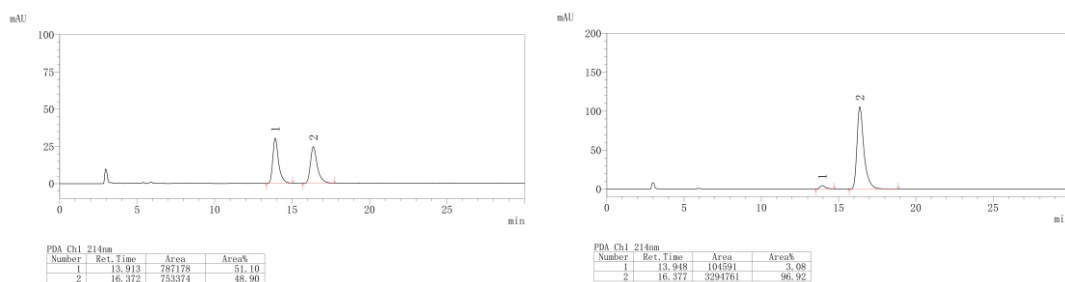

**(3*R*,3*aS*,7*aS*)-7*a*-(3-Chloropropyl)-3-methyl-2,3,3*a*,7*a*-tetrahydrobenzofuran-5(4*H*)-one (3r)**

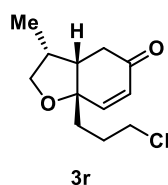

**Condition A**,  $R_f = 0.4$  (PE/EA = 5/1), colorless oil (41 mg, 90% yield).

**$^1\text{H}$  NMR** (400 MHz,  $\text{CDCl}_3$ )  $\delta$  (ppm) 6.62 (dd,  $J = 10.4, 0.8$  Hz, 1H), 6.04 (d,  $J = 10.4$  Hz, 1H), 4.03 (dd,  $J = 8.7, 7.0$  Hz, 1H), 3.58 (t,  $J = 6.1$  Hz, 2H), 3.38 (dd,  $J = 8.7, 6.4$  Hz, 1H), 2.63 – 2.48 (m, 4H), 1.97 – 1.79 (m, 4H), 0.90 (d,  $J = 6.8$  Hz, 3H).

**$^{13}\text{C}$  NMR** (100 MHz,  $\text{CDCl}_3$ )  $\delta$  (ppm) 198.3, 151.2, 129.8, 80.5, 73.5, 45.1, 43.8, 37.0, 36.7, 35.9, 27.3, 13.9.

**EI-MS:**  $[\text{M}]^{\oplus} 228$ ; **HRMS (EI):**  $[\text{M}]^{\oplus}$  calcd for  $\text{C}_{12}\text{H}_{17}^{35}\text{ClO}_2^{\oplus}$  228.0917, found 228.0923.

**Specific Rotation:**  $[\alpha]_D^{25.0} 53.2$  ( $c$  1.77,  $\text{CHCl}_3$ ) for 94% *ee*.

**Chiral HPLC analysis:** Phenomenex Lux 5u Cellulose-2 (PC-2) (250 mm); detected at 214 nm; *n*-hexane/*i*-propanol = 95/5; flow rate = 0.7 mL/min; Retention time: 28.4 min (major), 23.6 min (minor).

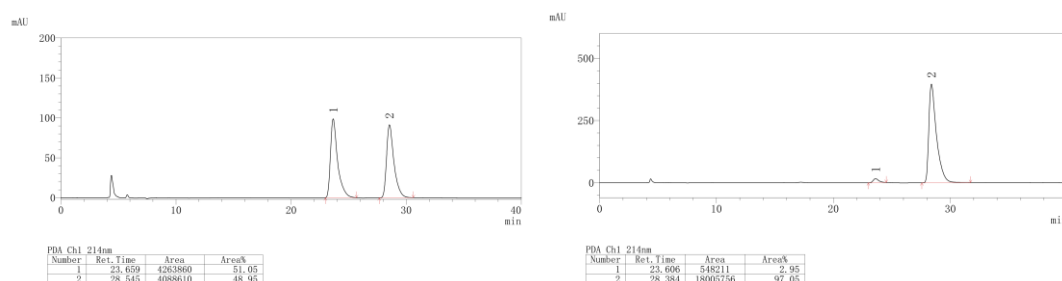

**(3R,3aS,7aS)-7a-(3-Bromopropyl)-3-methyl-2,3,3a,7a-tetrahydrobenzofuran-5(4H)-one (3s)**

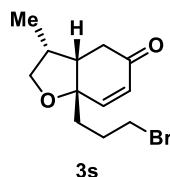

**Condition A**,  $R_f = 0.35$  (PE/EA = 5/1), colorless oil (46.3 mg, 85% yield).

**$^1\text{H}$  NMR** (400 MHz,  $\text{CDCl}_3$ )  $\delta$  (ppm) 6.62 (dd,  $J = 10.4, 0.5$  Hz, 1H), 6.04 (d,  $J = 10.4$  Hz, 1H), 4.03 (dd,  $J = 8.7, 7.0$  Hz, 1H), 3.45 (t,  $J = 6.5$  Hz, 2H), 3.38 (dd,  $J = 8.7, 6.3$  Hz, 1H), 2.63 – 2.47 (m, 4H), 2.07 – 1.78 (m, 4H), 0.90 (d,  $J = 6.8$  Hz, 3H).

**$^{13}\text{C}$  NMR** (100 MHz,  $\text{CDCl}_3$ )  $\delta$  (ppm) 198.2, 151.2, 129.8, 80.5, 73.5, 43.7, 37.9, 37.0, 35.9, 33.7, 27.4, 13.9.

**EI-MS**:  $[\text{M}]^{\oplus}$  272; **HRMS (EI)**:  $[\text{M}]^{\oplus}$  calcd for  $\text{C}_{12}\text{H}_{17}^{79}\text{BrO}_2^{\oplus}$  272.0412, found 272.0409.

**Specific Rotation**:  $[\alpha]_D^{25.0}$  35.0 ( $c$  1.77,  $\text{CHCl}_3$ ) for 94% *ee*.

**Chiral HPLC analysis**: Phenomenex Lux 5u Cellulose-2 (PC-2) (250 mm); detected at 214 nm; *n*-hexane/*i*-propanol = 95/5; flow rate = 0.7 mL/min; Retention time: 29.1 min (major), 24.1 min (minor).

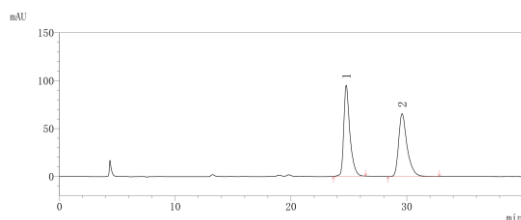

| Number | Ret. Time | Area    | Area% |
|--------|-----------|---------|-------|
| 1      | 24.170    | 3403348 | 51.00 |
| 2      | 29.596    | 3356002 | 49.00 |

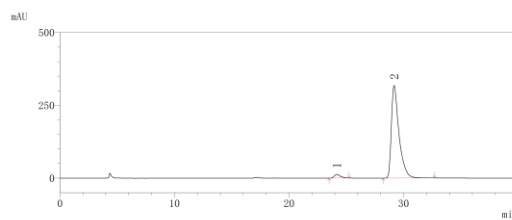

| Number | Ret. Time | Area     | Area% |
|--------|-----------|----------|-------|
| 1      | 24.170    | 475641   | 3.13  |
| 2      | 29.172    | 14717080 | 96.87 |

**(3R,3aS,7aS)-3-Methyl-7a-(3-(((8R,9S,13S,14S)-13-methyl-17-oxo-7,8,9,11,12,13,14,15,16,17-decahydro-6H-cyclopenta[a]phenanthren-3-yl)oxy)propyl)-2,3,3a,7a-tetrahydrobenzofuran-5(4H)-one (3t)**

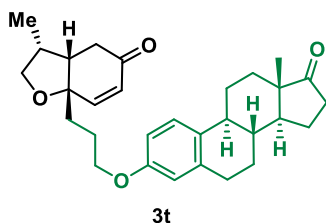

**Condition A**, **C2** was used instead of **C3**,  $R_f = 0.3$  (PE/EA = 5/2), white solid (43.3 mg, 94% yield, 0.1 mmol scale). m.p. = 172°C–173°C.

**<sup>1</sup>H NMR** (400 MHz, CDCl<sub>3</sub>) δ (ppm) 7.19 (d, *J* = 8.6 Hz, 1H), 6.72 – 6.61 (m, 3H), 6.04 (d, *J* = 10.4 Hz, 1H), 4.04 (dd, *J* = 8.6, 7.1 Hz, 1H), 3.96 (t, *J* = 5.3 Hz, 2H), 3.38 (dd, *J* = 8.6, 6.6 Hz, 1H), 2.93 – 2.83 (m, 2H), 2.64 – 2.45 (m, 5H), 2.43 – 2.35 (m, 1H), 2.28 – 2.21 (m, 1H), 2.19 – 1.82 (m, 8H), 1.65 – 1.40 (m, 6H), 0.93 – 0.88 (m, 6H).

**<sup>13</sup>C NMR** (100 MHz, CDCl<sub>3</sub>) δ (ppm) 221.0, 198.5, 156.9, 151.6, 137.8, 132.1, 129.7, 126.4, 114.5, 112.0, 80.8, 73.4, 67.7, 50.4, 48.0, 44.0, 43.5, 38.4, 37.0, 35.9, 35.9, 31.6, 29.7, 26.6, 25.9, 24.1, 21.6, 13.9, 13.9.

**ESI-MS:** [M+H]<sup>+</sup> 463.3; **HRMS (ESI):** [M+H]<sup>+</sup> calcd for C<sub>30</sub>H<sub>39</sub>O<sub>4</sub><sup>+</sup> 463.2843, found 463.2846.

**Specific Rotation:** [α]<sub>D</sub><sup>25.0</sup> 100.0 (*c* 1.45, CHCl<sub>3</sub>) for 95:5 dr.

**Chiral HPLC analysis:** Phenomenex Lux 5u Cellulose-2 (PC-2) Column (250 mm); detected at 214 nm; *n*-hexane/*i*-propanol = 80/20; flow rate = 1.5 mL/min; Retention time: 35.8min (major), 29.4 min (minor).

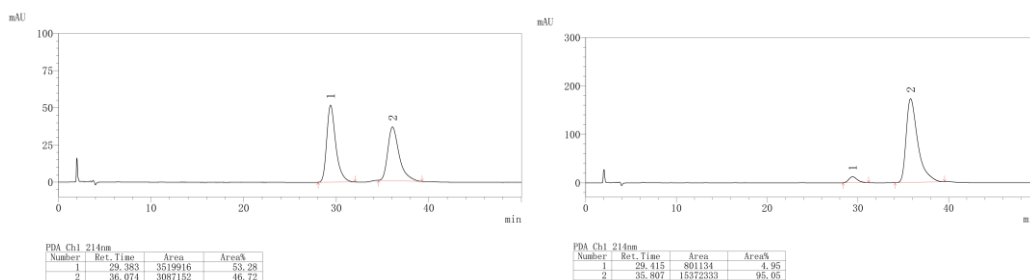

**(3*S*,3*aR*,7*aR*)-3-Methyl-7*a*-(3-(((8*R*,9*S*,13*S*,14*S*)-13-methyl-17-oxo-7,8,9,11,12,13,14,15,16,17-decahydro-6*H*-cyclopenta[*a*]phenanthren-3-yl)oxy)propyl)-2,3,3*a*,7*a*-tetrahydrobenzofuran-5(4*H*)-one (3*t*')**

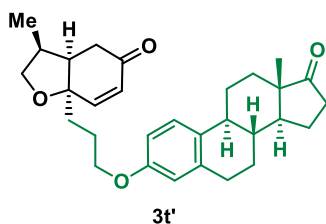

**Condition A**, *ent*-**C2** was used instead of **C3**, *R<sub>f</sub>* = 0.3 (PE/EA = 5/2), white solid (44 mg, 95% yield, 0.1 mmol scale). m.p. = 176°C–177°C.

**<sup>1</sup>H NMR** (400 MHz, CDCl<sub>3</sub>) δ (ppm) 7.19 (d, *J* = 8.6 Hz, 1H), 6.73 – 6.61 (m, 3H), 6.04 (d, *J* = 10.4 Hz, 1H), 4.04 (dd, *J* = 8.6, 7.1 Hz, 1H), 3.96 (t, *J* = 5.6 Hz, 2H), 3.38 (dd, *J* = 8.7, 6.6 Hz, 1H), 2.93 – 2.82 (m, 2H), 2.66 – 2.46 (m, 5H), 2.42 – 2.35 (m, 1H), 2.28 – 2.20 (m, 1H), 2.18 – 1.82 (m, 8H), 1.68 – 1.38 (m, 6H), 0.93 – 0.88 (m, 6H).

**<sup>13</sup>C NMR** (100 MHz, CDCl<sub>3</sub>) δ (ppm) 221.0, 198.5, 156.9, 151.6, 137.8, 132.1, 129.7, 126.4, 114.5, 112.1, 80.8, 73.4, 67.7, 50.4, 48.0, 44.0, 43.6, 38.4, 37.0, 36.0, 35.9, 31.6, 29.7, 26.6, 25.9, 24.1, 21.6, 13.9, 13.9.



**ESI-MS:**  $[M+H]^+$  463.3; **HRMS (ESI):**  $[M+H]^+$  calcd for  $C_{30}H_{39}O_4^+$  463.2843, found 463.2846.

**Specific Rotation:**  $[\alpha]_D^{25.0}$  75.0 ( $c$  1.83,  $CHCl_3$ ) for 6:94 dr.

**Chiral HPLC analysis:** Phenomenex Lux 5u Cellulose-2 (PC-2) Column (250 mm); detected at 214 nm;  $n$ -hexane/ $i$ -propanol = 80/20; flow rate = 1.5 mL/min; Retention time: 29.2min (major), 36.1 min (minor).

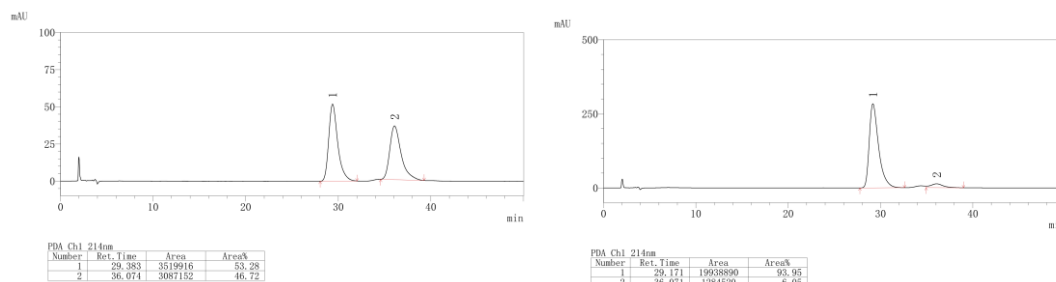

**(3*R*,3*aS*,7*aS*)-7*a*-(3-(((*R*)-2,8-Dimethyl-2-((4*R*,8*R*)-4,8,12-trimethyltridecyl)chroman-6-yl)oxy)propyl)-3-methyl-2,3,3*a*,7*a*-tetrahydrobenzofuran-5(4*H*)-one (3u)**

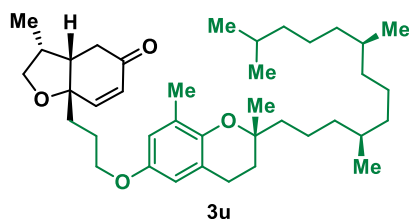

**Condition A, C2** was used instead of **C3**,  $R_f$  = 0.4 (PE/EA = 10/1), light yellow oil (35.8 mg, 60% yield, 0.1 mmol scale).

**$^1H$  NMR** (400 MHz,  $CDCl_3$ )  $\delta$  (ppm) 6.65 (d,  $J$  = 10.4 Hz, 1H), 6.55 (d,  $J$  = 2.6 Hz, 1H), 6.42 (d,  $J$  = 2.7 Hz, 1H), 6.04 (d,  $J$  = 10.4 Hz, 1H), 4.03 (dd,  $J$  = 8.6, 7.1 Hz, 1H), 3.90 (t,  $J$  = 5.5 Hz, 2H), 3.38 (dd,  $J$  = 8.6, 6.7 Hz, 1H), 2.77 – 2.66 (m, 2H), 2.66 – 2.50 (m, 4H), 2.13 (s, 3H), 1.97 – 1.69 (m, 6H), 1.58 – 1.46 (m, 3H), 1.43 – 1.20 (m, 15H), 1.17 – 1.02 (m, 6H), 0.92 – 0.81 (m, 15H).

**$^{13}C$  NMR** (100 MHz,  $CDCl_3$ )  $\delta$  (ppm) 198.6, 151.7, 151.4, 146.3, 129.7, 127.3, 121.0, 115.5, 111.9, 80.9, 75.6, 73.4, 68.3, 43.6, 40.0, 39.4, 37.5, 37.5, 37.3, 37.1, 36.0, 32.9, 32.8, 31.4, 28.1, 24.9, 24.5, 24.3, 24.2, 22.8, 22.7, 22.7, 21.1, 19.8, 19.7, 16.3, 13.9.

**ESI-MS:**  $[M+H]^+$  595.5; **HRMS (ESI):**  $[M+H]^+$  calcd for  $C_{39}H_{63}O_4^+$  595.4721, found 595.4729.

**Specific Rotation:**  $[\alpha]_D^{24.9}$  11.9 ( $c$  1.43,  $CHCl_3$ ) for 95:5 dr.

**Chiral HPLC analysis:** Phenomenex Lux 5u Cellulose-2 (PC-2) Column (250 mm); detected at 214 nm;  $n$ -hexane/ $i$ -propanol = 98/2; flow rate = 0.5 mL/min; Retention time: 32.5 min (major), 27.7 min (minor).

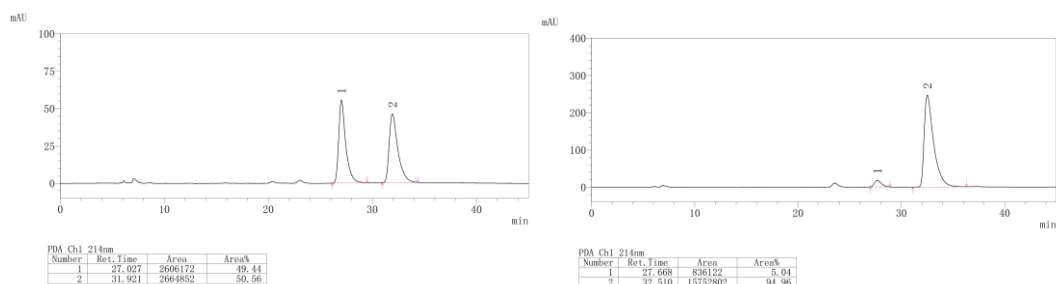

**(3*S*,3*a**R*,7*a**R*)-7*a*-(3-(((*R*)-2,8-dimethyl-2-(((4*R*,8*R*)-4,8,12-trimethyltridecyl)chroman-6-yl)oxy)propyl)-3-methyl-2,3,3*a*,7*a*-tetrahydrobenzofuran-5(4*H*)-one (3*u*'**

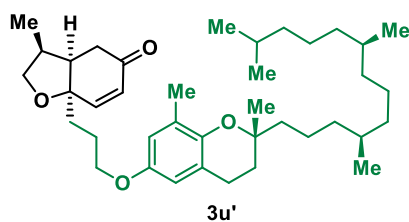

**Condition A**, *ent*-**C2** was used instead of **C3**,  $R_f = 0.4$  (PE/EA = 10/1), light yellow oil (35 mg, 59% yield, 0.1 mmol scale).

<sup>1</sup>H NMR (400 MHz, CDCl<sub>3</sub>)  $\delta$  (ppm) 6.65 (d,  $J = 10.4$  Hz, 1H), 6.55 (d,  $J = 2.6$  Hz, 1H), 6.42 (d,  $J = 2.7$  Hz, 1H), 6.04 (d,  $J = 10.4$  Hz, 1H), 4.03 (dd,  $J = 8.6, 7.1$  Hz, 1H), 3.90 (t,  $J = 5.6$  Hz, 2H), 3.38 (dd,  $J = 8.6, 6.7$  Hz, 1H), 2.74 – 2.67 (m, 2H), 2.66 – 2.50 (m, 4H), 2.13 (s, 3H), 1.98 – 1.69 (m, 6H), 1.58 – 1.47 (m, 3H), 1.43 – 1.20 (m, 15H), 1.16 – 1.02 (m, 6H), 0.92 – 0.82 (m, 15H).

<sup>13</sup>C NMR (100 MHz, CDCl<sub>3</sub>)  $\delta$  (ppm) 198.6, 151.7, 151.4, 146.3, 129.7, 127.3, 121.0, 115.5, 111.9, 80.9, 75.6, 73.4, 68.3, 43.6, 40.0, 39.4, 37.5, 37.5, 37.3, 37.1, 36.0, 32.9, 32.8, 31.4, 28.1, 24.9, 24.5, 24.3, 24.2, 22.8, 22.7, 22.7, 21.1, 19.8, 19.7, 16.3, 13.9.

**ESI-MS:** [M+H]<sup>+</sup> 595.5; **HRMS (ESI):** [M+H]<sup>+</sup> calcd for C<sub>39</sub>H<sub>63</sub>O<sub>4</sub><sup>+</sup> 595.4721, found 595.4729.

**Specific Rotation:**  $[\alpha]_D^{25.0} -2.9$  ( $c$  1.45, CHCl<sub>3</sub>) for 5: 95 dr.

**Chiral HPLC analysis:** Phenomenex Lux 5u Cellulose-2 (PC-2) Column (250 mm); detected at 214 nm; *n*-hexane/*i*-propanol = 98/2; flow rate = 0.5 mL/min; Retention time: 26.8 min (major), 31.9 min (minor).

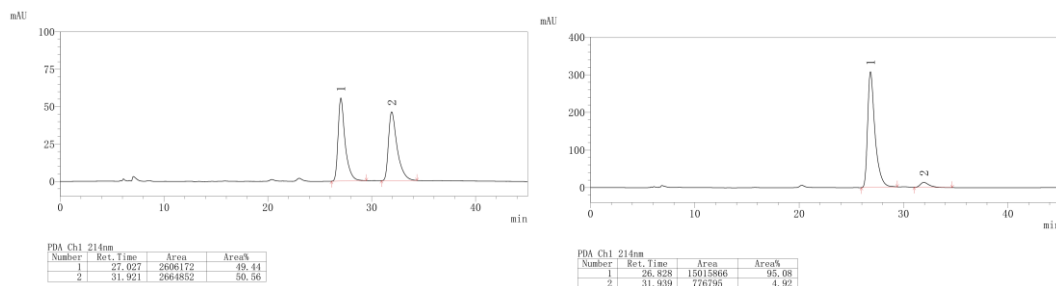

**(3R,3aS,7aS)-3-(4-Bromobenzyl)-7a-(4-bromophenyl)-2,3,3a,7a-tetrahydrobenzofuran-5(4H)-one (3v)**

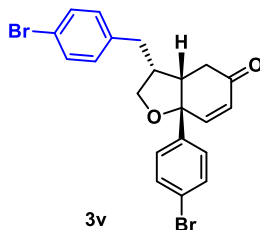

**Condition C**,  $R_f = 0.4$  (PE/EA = 5/1), colorless oil (35.2 mg, 77% yield).

$^1\text{H NMR}$  (400 MHz,  $\text{CDCl}_3$ )  $\delta$  (ppm) 7.50 (d,  $J = 8.0$  Hz, 2H), 7.39 (d,  $J = 8.0$  Hz, 2H), 7.25 (d,  $J = 8.0$  Hz, 2H), 6.97 (d,  $J = 8.0$  Hz, 2H), 6.58 (d,  $J = 10.1$  Hz, 1H), 6.18 (d,  $J = 10.1$  Hz, 1H), 4.11 (dd,  $J = 8.7, 7.5$  Hz, 1H), 3.89 – 3.83 (m, 1H), 2.82 (dd,  $J = 14.4, 7.0$  Hz, 1H), 2.75 – 2.46 (m, 5H).

$^{13}\text{C NMR}$  (100 MHz,  $\text{CDCl}_3$ )  $\delta$  (ppm) 198.2, 148.3, 142.8, 138.5, 131.9, 131.9, 130.2, 129.2, 126.9, 122.0, 120.4, 82.7, 72.3, 47.5, 43.3, 35.5, 33.4.

**FT-MS**:  $[\text{M}+\text{H}]^{\oplus}$  461.0; **HRMS (DART)**:  $[\text{M}+\text{H}]^{\oplus}$  calcd for  $\text{C}_{21}\text{H}_{19}^{79}\text{Br}_2\text{O}_2^{\oplus}$  460.9746, found 460.9736.

**Specific Rotation**:  $[\alpha]_{\text{D}}^{25.0} -107.3$  ( $c$  0.88,  $\text{CHCl}_3$ ) for >99% *ee*.

**Chiral HPLC analysis**: Chiralpak IA Column (250 mm); detected at 214 nm; *n*-hexane/*i*-propanol = 85/15; flow rate = 0.7 mL/min; Retention time: 17.4 min (major), 11.6 min (minor).

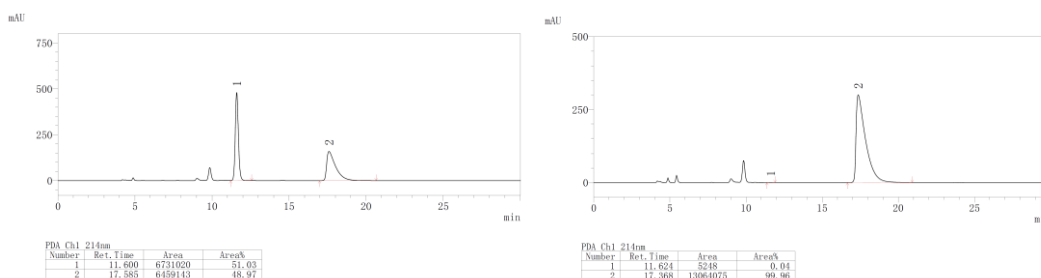

**(3R,3aS,7aS)-7a-(4-Bromophenyl)-3-(4-methylbenzyl)-2,3,3a,7a-tetrahydrobenzofuran-5(4H)-one (3w)**

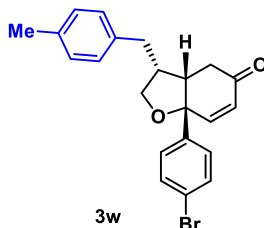

**Condition C**,  $R_f = 0.3$  (PE/EA = 9/1), colorless oil (19.5 mg, 49% yield).

$^1\text{H NMR}$  (400 MHz,  $\text{CDCl}_3$ )  $\delta$  (ppm) 7.49 (d,  $J = 8.0$  Hz, 2H), 7.24 (d,  $J = 8.0$  Hz, 2H), 7.07 (d,  $J = 8.0$  Hz, 2H), 6.98 (d,  $J = 8.0$  Hz, 2H), 6.57 (d,  $J = 10.1$  Hz, 1H), 6.16 (d,  $J = 10.1$  Hz, 1H), 4.17 – 4.09 (m, 1H), 3.93 – 3.86 (m, 1H), 2.81 (dd,  $J = 14.7, 6.8$  Hz, 1H), 2.75 – 2.47 (m, 5H), 2.30 (s, 3H).

$^{13}\text{C}$  NMR (100 MHz,  $\text{CDCl}_3$ )  $\delta$  (ppm) 198.5, 148.3, 143.1, 136.4, 136.1, 131.8, 129.4, 129.1, 128.3, 126.9, 121.9, 82.7, 72.6, 47.5, 43.4, 35.5, 33.5, 21.1.

**FT-MS:**  $[\text{M}+\text{H}]^{\oplus}$  397.1; **HRMS (DART):**  $[\text{M}+\text{H}]^{\oplus}$  calcd for  $\text{C}_{22}\text{H}_{22}^{79}\text{BrO}_2^{\oplus}$  397.0798, found 397.0790.

**Specific Rotation:**  $[\alpha]_{\text{D}}^{25.0}$  -117.8 ( $c$  0.74,  $\text{CHCl}_3$ ) for >99% *ee*.

**Chiral HPLC analysis:** Phenomenex Lux 5u Cellulose-2 (PC-2) (250 mm); detected at 214 nm; *n*-hexane/*i*-propanol = 80/20; flow rate = 1.0 mL/min; Retention time: 8.8 min (major), 8.1 min (minor).

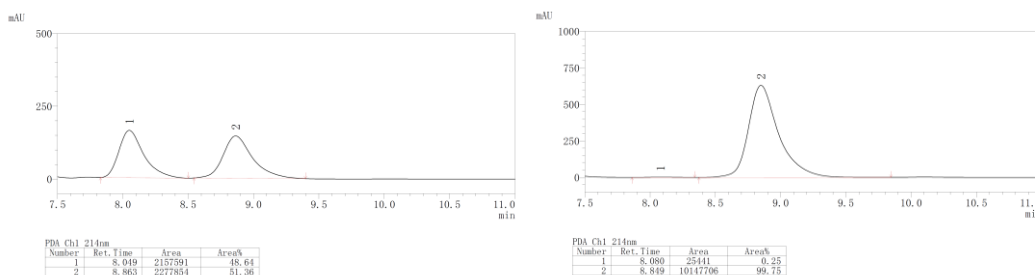

**(3*R*,3*aS*,7*aS*)-3-(Naphthalen-2-ylmethyl)-7*a*-phenyl-2,3,3*a*,7*a*-tetrahydrobenzofuran-5(4*H*)-one (3*x*)**

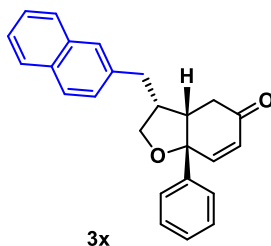

**Condition C,**  $R_f$  = 0.5 (PE/EA = 5/1), colorless oil (21.7 mg, 61% yield).

$^1\text{H}$  NMR (400 MHz,  $\text{CDCl}_3$ )  $\delta$  (ppm) 7.81 – 7.73 (m, 3H), 7.55 (s, 1H), 7.48 – 7.42 (m, 2H), 7.41 – 7.34 (m, 4H), 7.34 – 7.29 (m, 1H), 7.22 (dd,  $J$  = 8.4, 1.6 Hz, 1H), 6.65 (d,  $J$  = 10.1 Hz, 1H), 6.20 (d,  $J$  = 10.2 Hz, 1H), 4.14 (dd,  $J$  = 8.5, 7.1 Hz, 1H), 4.00 – 3.92 (m, 1H), 2.95 – 2.83 (m, 3H), 2.78 – 2.65 (m, 3H).

$^{13}\text{C}$  NMR (100 MHz,  $\text{CDCl}_3$ )  $\delta$  (ppm) 198.7, 149.1, 143.8, 137.2, 133.6, 132.2, 128.9, 128.8, 128.4, 127.8, 127.7, 127.5, 126.9, 126.8, 126.2, 125.6, 125.0, 83.0, 72.4, 47.6, 43.5, 35.7, 34.3.

**FT-MS:**  $[\text{M}+\text{H}]^{\oplus}$  355.2; **HRMS (DART):**  $[\text{M}+\text{H}]^{\oplus}$  calcd for  $\text{C}_{25}\text{H}_{23}\text{O}_2^{\oplus}$  355.1693, found 355.1685.

**Specific Rotation:**  $[\alpha]_{\text{D}}^{25.0}$  -90.2 ( $c$  0.9,  $\text{CHCl}_3$ ) for >99% *ee*.

**Chiral HPLC analysis:** Phenomenex Lux 5u Cellulose-2 (PC-2) (250 mm); detected at 214 nm; *n*-hexane/*i*-propanol = 80/20; flow rate = 1.0 mL/min; Retention time: 12.0 min (major), 9.7 min (minor).

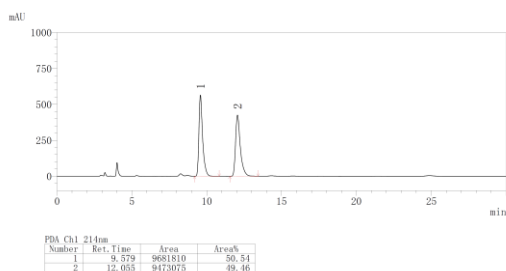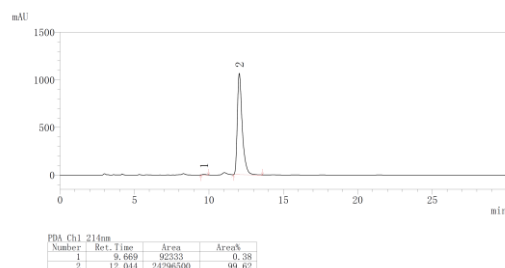

**(3*R*,3*aS*,7*aS*)-7*a*-(4-Bromophenyl)-3-((4,4,5,5-tetramethyl-1,3,2-dioxaborolan-2-yl)methyl)-2,3,3*a*,7*a*-tetrahydrobenzofuran-5(4*H*)-one (3*y*)**

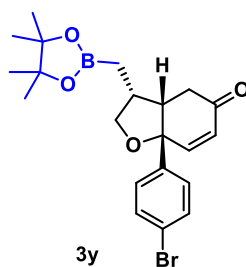

**Condition C**,  $R_f = 0.5$  (PE/EA = 5/1), colorless oil (21.8 mg, 50% yield).

**$^1\text{H}$  NMR** (400 MHz,  $\text{CDCl}_3$ )  $\delta$  (ppm) 7.50 (d,  $J = 8.5$  Hz, 2H), 7.28 (s, 2H), 6.54 (d,  $J = 10.1$  Hz, 1H), 6.13 (d,  $J = 10.1$  Hz, 1H), 4.32 – 4.27 (m, 1H), 3.72 – 3.67 (m, 1H), 2.76 (dd,  $J = 14.5, 7.2$  Hz, 1H), 2.61 (dd,  $J = 15.8, 7.8$  Hz, 1H), 2.52 (d,  $J = 7.2$  Hz, 2H), 1.21 (s, 12H), 0.78 (qd,  $J = 15.8, 8.1$  Hz, 2H).

**$^{13}\text{C}$  NMR** (100 MHz,  $\text{CDCl}_3$ )  $\delta$  (ppm) 198.8, 148.4, 143.3, 131.7, 129.3, 127.0, 121.7, 83.5, 82.5, 74.3, 48.3, 37.6, 35.4, 24.9, 24.8.

**FT-MS**:  $[\text{M}+\text{H}]^{\oplus}$  432.1; **HRMS (DART)**:  $[\text{M}+\text{H}]^{\oplus}$  calcd for  $\text{C}_{21}\text{H}_{27}^{79}\text{Br}^{10}\text{BO}_4^{\oplus}$  432.1217, found 432.1210.

**Specific Rotation**:  $[\alpha]_{\text{D}}^{25.0} -93$  ( $c$  0.25,  $\text{CHCl}_3$ ) for >99% *ee*.

**Chiral HPLC analysis**: Phenomenex Lux 5u Cellulose-2 (PC-2) (250 mm); detected at 214 nm; *n*-hexane/*i*-propanol = 95/5; flow rate = 0.7 mL/min; Retention time: 20.6 min (major), 13.9 min (minor).

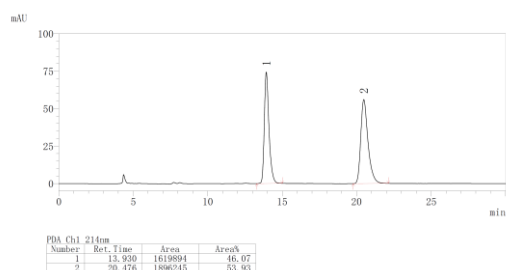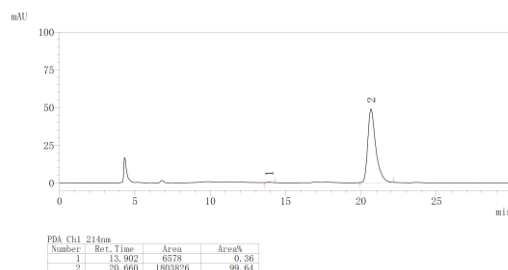

## Unsuccessful substrates:

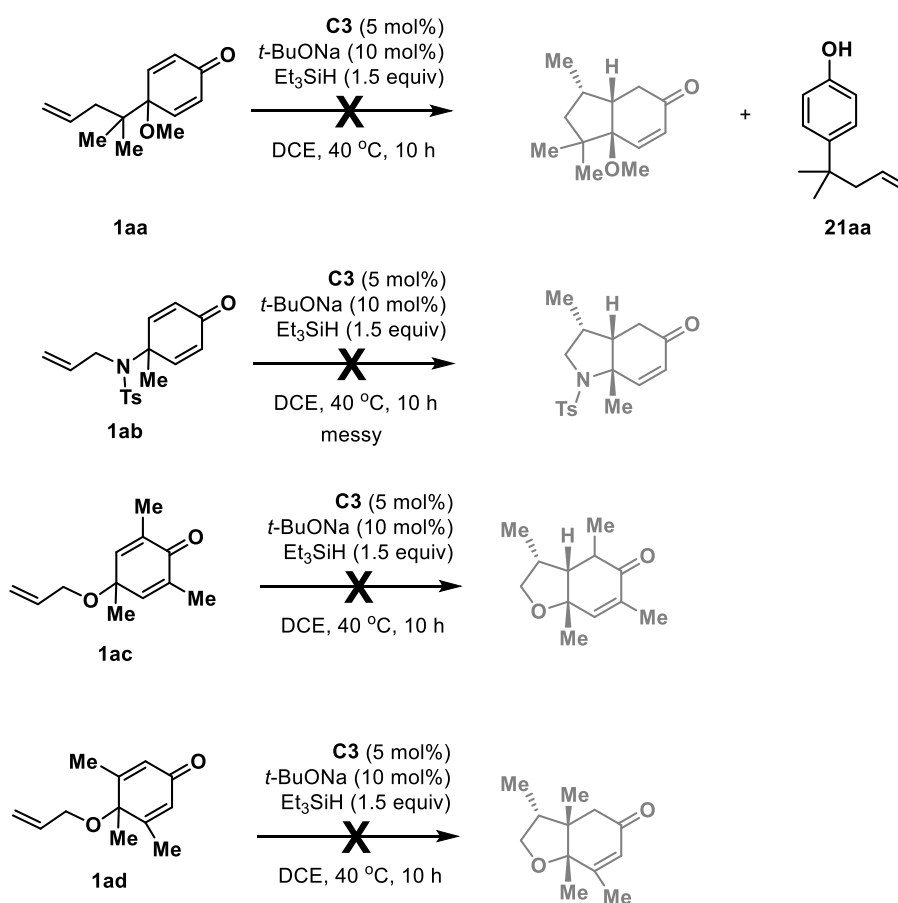

## 4. Kinetic resolution of *rac*-1z

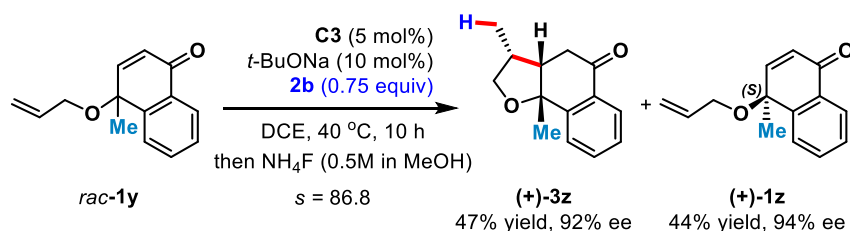

A dried Schlenk flask was charged with **C3** (5.66 mg, 5 mol%) and *t*-BuONa (2.0 mg, 10 mol%), backfilled with argon. Then anhydrous DCE (1 mL), Et<sub>3</sub>SiH (0.15 mmol, 0.75 equiv) and *rac*-**1z** (0.2 mmol, 1.0 equiv) were added. After the mixture was stirred at 40 °C for 10 h, the reaction mixture was cooled to room temperature. Then NH<sub>4</sub>F (0.5M in MeOH) was added to quench the reaction and stirred for 10 min. Finally, the reaction mixture was filtered, washed with EtOAc (10 mL × 3) and concentrated in vacuo. The residue was purified by flash silica gel chromatography to afford product **(+)-3z** and **(+)-1z**.

**(3R,3aS,9bR)-3,9b-Dimethyl-2,3,3a,9b-tetrahydronaphtho[1,2-b]furan-5(4H)-one ((+)-3z)**

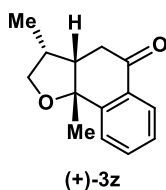

$R_f = 0.3$  (PE/EA = 4/1), colorless oil (20.3 mg, 47% yield).

$^1\text{H NMR}$  (400 MHz,  $\text{CDCl}_3$ )  $\delta$  (ppm) 7.95 (dd,  $J = 7.9, 0.9$  Hz, 1H), 7.70 – 7.57 (m, 2H), 7.41 – 7.34 (m, 1H), 4.16 – 4.09 (m, 1H), 3.12 (dd,  $J = 8.8, 6.7$  Hz, 1H), 2.91 – 2.77 (m, 2H), 2.72 – 2.58 (m, 2H), 1.64 (s, 3H), 0.74 (d,  $J = 6.9$  Hz, 3H).

$^{13}\text{C NMR}$  (100 MHz,  $\text{CDCl}_3$ )  $\delta$  (ppm) 197.3, 147.4, 134.6, 131.5, 127.7, 127.0, 125.8, 80.4, 73.5, 46.5, 36.4, 36.2, 29.2, 14.7.

**EI-MS:**  $[\text{M}]^{\oplus} 216$ ; **HRMS (EI):**  $[\text{M}]^{\oplus}$  calcd for  $\text{C}_{14}\text{H}_{16}\text{O}_2^{\oplus}$  216.1150, found 216.1158.

**Specific Rotation:**  $[\alpha]_D^{25.0}$  22.5 ( $c$  0.86,  $\text{CHCl}_3$ ) for 92% *ee*.

**Chiral HPLC analysis:** Phenomenex Lux 5u Cellulose-2 (PC-2) (250 mm); detected at 214 nm; *n*-hexane/*i*-propanol = 98/2; flow rate = 0.7 mL/min; Retention time: 18.4 min (major), 14.7 min (minor).

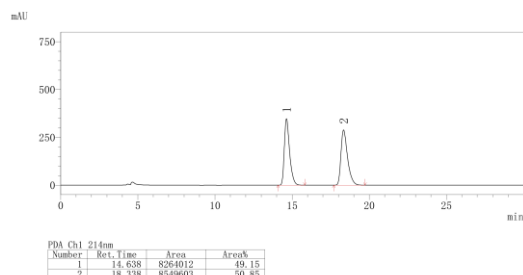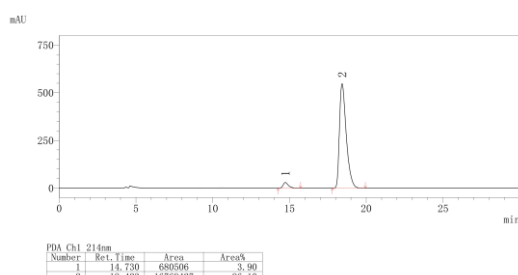

**(S)-4-(Allyloxy)-4-methylnaphthalen-1(4H)-one ((+)-1z)**

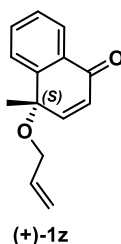

$R_f = 0.6$  (PE/EA = 4/1), colorless oil (19 mg, 44% yield).

$^1\text{H NMR}$  (400 MHz,  $\text{CDCl}_3$ )  $\delta$  (ppm) 8.14 (dd,  $J = 7.9, 0.8$  Hz, 1H), 7.72 – 7.60 (m, 2H), 7.50 – 7.41 (m, 1H), 6.98 (d,  $J = 10.3$  Hz, 1H), 6.49 (d,  $J = 10.3$  Hz, 1H), 5.84 (ddd,  $J = 22.7, 10.7, 5.5$  Hz, 1H), 5.27 – 5.19 (m, 1H), 5.13 (dd,  $J = 10.4, 1.4$  Hz, 1H), 3.72 (ddt,  $J = 12.1, 5.6, 1.3$  Hz, 1H), 3.53 (ddt,  $J = 12.2, 5.4, 1.4$  Hz, 1H), 1.64 (s, 3H).

$^{13}\text{C}$  NMR (100 MHz,  $\text{CDCl}_3$ )  $\delta$  (ppm) 184.3, 152.7, 145.2, 134.6, 133.3, 131.3, 130.1, 128.2, 126.8, 126.3, 116.9, 73.8, 66.4, 30.6.

ESI-MS:  $[\text{M}+\text{H}]^{\oplus}$  215.1; HRMS (ESI):  $[\text{M}+\text{H}]^{\oplus}$  calcd for  $\text{C}_{14}\text{H}_{15}\text{O}_2^{\oplus}$  215.1067, found 215.1067.

Specific Rotation:  $[\alpha]_{\text{D}}^{25.0}$  76.6 ( $c$  0.89,  $\text{CHCl}_3$ ) for 94% *ee*.

Chiral HPLC analysis: Chiralpak OD-H Column (250 mm); detected at 214 nm; *n*-hexane/*i*-propanol = 95/5; flow rate = 0.7 mL/min; Retention time: 11.5 min (major), 6.2 min (minor).

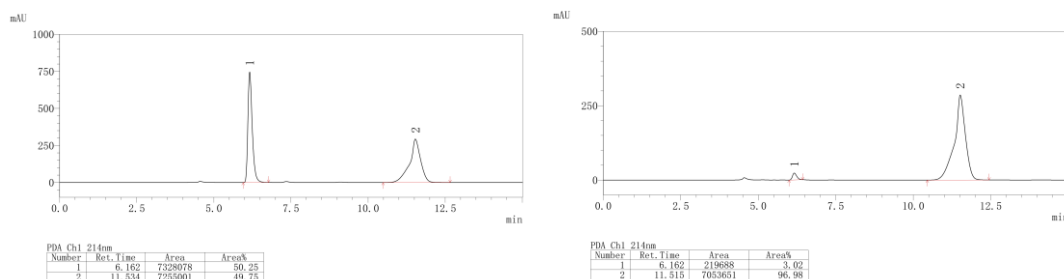

## 5. Deuterium-labelling experiment

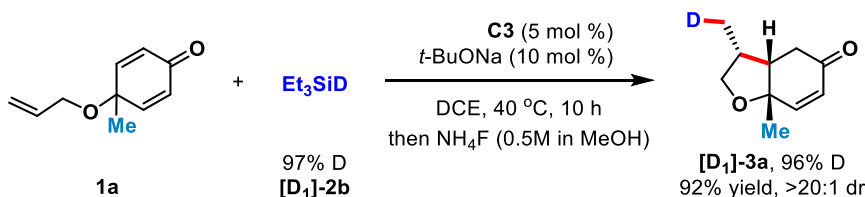

**(3*R*,3*aS*,7*aS*)-7*a*-Methyl-3-(methyl-*d*)-2,3,3*a*,7*a*-tetrahydrobenzofuran-5(4*H*)-one ([D<sub>1</sub>]-3a)** A dried Schlenk flask was charged with **C3** (5.66 mg, 5 mol%) and *t*-BuONa (2.0 mg, 10 mol%), backfilled with argon. Then anhydrous DCE (2 mL),  $\text{Et}_3\text{SiD}$  (0.276 mmol, 1.5 equiv) and **1a** (0.184 mmol, 1.0 equiv) were added. After the mixture was stirred at 40 °C for 10 h, the reaction mixture was cooled to room temperature. Then  $\text{NH}_4\text{F}$  (0.5M in MeOH) was added to quench the reaction and stirred for 10 min. Finally, the reaction mixture was filtered, washed with EtOAc (10 mL  $\times$  3) and concentrated in vacuo. The residue was purified by flash silica gel chromatography (PE/EA = 5/1) to afford product **[D<sub>1</sub>]-3a**.

light yellow oil (28.2 mg, 92% yield, 96% D).

$^1\text{H}$  NMR (400 MHz,  $\text{CDCl}_3$ )  $\delta$  (ppm) 6.62 (d,  $J$  = 10.3 Hz, 1H), 5.98 (d,  $J$  = 10.3 Hz, 1H), 4.08 (dd,  $J$  = 8.6, 7.6 Hz, 1H), 3.37 (dd,  $J$  = 8.6, 7.4 Hz, 1H), 2.66 – 2.48 (m, 4H), 1.46 (s, 3H), 0.89 (dt,  $J$  = 5.3, 1.6 Hz, 2H).

$^{13}\text{C}$  NMR (100 MHz,  $\text{CDCl}_3$ )  $\delta$  (ppm) 198.5, 152.6, 129.0, 78.9, 73.5, 45.6, 36.6, 35.7, 25.8, 13.50 (t,  $J$  = 19.0 Hz).

EI-MS:  $[\text{M}]^{\oplus}$  167; HRMS (EI):  $[\text{M}]^{\oplus}$  calcd for  $\text{C}_{10}\text{H}_{13}\text{DO}_2^{\oplus}$  167.1057, found 167.1063.



## 6. Subgram-scale experiment

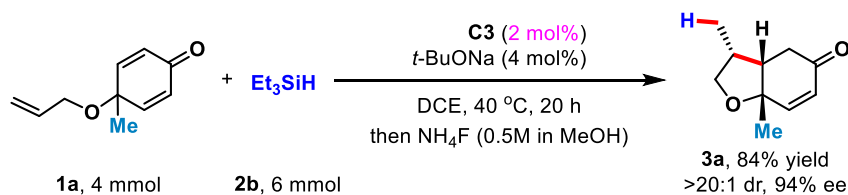

A dried Schlenk flask was charged with **C3** (45.3 mg, 2 mol%) and *t*-BuONa (15.4 mg, 4 mol%), backfilled with argon. Then anhydrous DCE (10 mL), Et<sub>3</sub>SiH (6.0 mmol, 1.5 equiv) and **1a** (4.0 mmol, 1.0 equiv) were added. After the mixture was stirred at 40 °C for 20 h, the reaction mixture was cooled to room temperature. Then NH<sub>4</sub>F (0.5M in MeOH) was added to quench the reaction and stirred for 10 min. Finally, the reaction mixture was filtered, washed with EtOAc (100 mL × 3) and concentrated in vacuo. The residue was purified by flash silica gel chromatography (PE/EA = 5/1) to afford product **3a** (556 mg, 84% yield).

## 7. Transformations of cyclization product

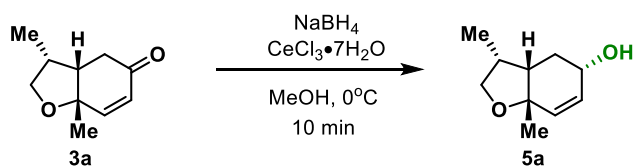

**(3*R*,3*aS*,5*S*,7*aS*)-3,7*a*-Dimethyl-2,3,3*a*,4,5,7*a*-hexahydrobenzofuran-5-ol (5a)** A dried Schlenk flask was charged with **3a** (33.2 mg, 0.2 mmol, 1.0 equiv), CeCl<sub>3</sub>·7H<sub>2</sub>O (89 mg, 1.2 equiv) and MeOH (2.0 mL). It was cooled to 0 °C and NaBH<sub>4</sub> (9.12 mg, 1.2 equiv) was added carefully. The reaction mixture was stirred at 0 °C for 10 mins. Then it was concentrated under reduced pressure. The residue was purified by flash column chromatography using petroleum ether/ethyl acetate eluent (PE/EA = 2:1) to afford the desired product **5a** as colorless oil (24.5 mg, 73% yield, >20:1 dr).

**<sup>1</sup>H NMR** (400 MHz, CDCl<sub>3</sub>) δ (ppm) 5.79 (d, *J* = 10.0 Hz, 1H), 5.68 (dd, *J* = 10.0, 2.0 Hz, 1H), 4.21 – 4.12 (m, 1H), 3.97 (t, *J* = 8.0 Hz, 1H), 3.48 (dd, *J* = 10.7, 8.2 Hz, 1H), 2.83 – 2.69 (m, 1H), 2.15 (s, 1H), 1.98 (ddd, *J* = 13.5, 6.7, 4.8 Hz, 1H), 1.92 – 1.83 (m, 1H), 1.26 – 1.16 (m, 4H), 0.98 (d, *J* = 6.9 Hz, 3H).

**<sup>13</sup>C NMR** (100 MHz, CDCl<sub>3</sub>) δ (ppm) 133.3, 132.1, 79.6, 72.4, 67.6, 44.4, 35.7, 30.8, 28.4, 11.2.

**EI-MS:** [M]<sup>+</sup> 168; **HRMS (EI):** [M]<sup>+</sup> calcd for C<sub>10</sub>H<sub>16</sub>O<sub>2</sub><sup>+</sup> 168.1150, found 168.1145.

**Specific Rotation:** [α]<sub>D</sub><sup>25.0</sup> 16.2 (*c* 1.2, CHCl<sub>3</sub>) for 94% *ee*.

**Chiral HPLC analysis:** Phenomenex Lux 5u Cellulose-2 (PC-2) (250 mm); detected at 214 nm; *n*-hexane/*i*-propanol = 90/10; flow rate = 0.7 mL/min; Retention time: 16.0 min (major), 14.1 min (minor).

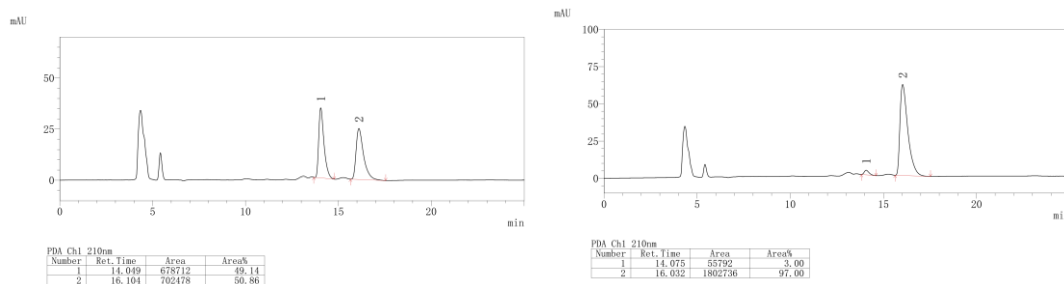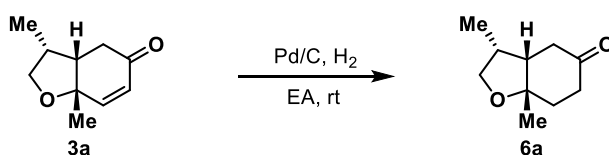

**(3*R*,3*aS*,7*aS*)-3,7*a*-Dimethylhexahydrobenzofuran-5(4*H*)-one (6*a*)** A dried Schlenk flask was charged with **3a** (33.2 mg, 0.2 mmol, 1.0 equiv), Pd/C (31.8 mg, 15 mol%) and EA (2.0 mL), backfilled with hydrogen. The reaction mixture was stirred at room temperature overnight. The reaction mixture was filtered, washed with EtOAc (10 mL × 3) and concentrated in vacuo. The residue was purified by flash column chromatography using petroleum ether/ethyl acetate eluent (PE/EA = 4:1) to afford the desired product **6a** as colorless oil (28.3 mg, 84% yield).

<sup>1</sup>H NMR (400 MHz, CDCl<sub>3</sub>) δ (ppm) 4.04 – 3.97 (m, 1H), 3.43 (t, *J* = 9.2 Hz, 1H), 2.73 – 2.61 (m, 1H), 2.53 – 2.42 (m, 1H), 2.38 – 2.07 (m, 5H), 1.99 (dt, *J* = 18.7, 6.7 Hz, 1H), 1.31 (s, 3H), 0.95 (d, *J* = 7.0 Hz, 3H).

<sup>13</sup>C NMR (100 MHz, CDCl<sub>3</sub>) δ (ppm) 213.3, 82.0, 72.7, 46.3, 38.1, 36.7, 35.8, 34.2, 27.5, 11.9.

**EI-MS:** [M]<sup>+</sup> 168; **HRMS (EI):** [M]<sup>+</sup> calcd for C<sub>10</sub>H<sub>16</sub>O<sub>2</sub><sup>+</sup> 168.1150, found 168.1149.

**Specific Rotation:** [α]<sub>D</sub><sup>25.0</sup> -21.7 (*c* 0.81, CHCl<sub>3</sub>) for 96% *ee*.

**Chiral GC analysis:** The enantiomeric ratio was determined by GC using Cyclosil-B (30m×0.25mm×0.25um) column (150 °C – 260 °C). He carrier gas at 1.0 mL/min. Retention time: 14.2 min (major), 13.9 min (minor).

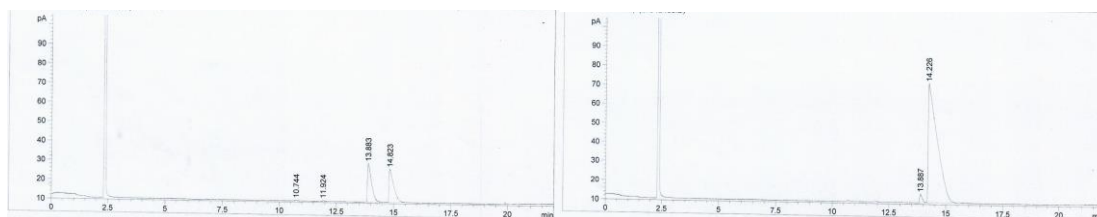

| Peak #   | RetTime [min] | Type | Width [min] | Area [pA*s] | Height [pA] | Area %   |
|----------|---------------|------|-------------|-------------|-------------|----------|
| 1        | 10.744        | PBA  | 0.0995      | 3.56317     | 4.44534e-1  | 0.72320  |
| 2        | 11.924        | BBA  | 0.1016      | 3.36487     | 4.10573e-1  | 0.68295  |
| 3        | 13.883        | PBA  | 0.1658      | 243.06203   | 19.99786    | 49.33301 |
| 4        | 14.823        | BB   | 0.1867      | 242.70645   | 16.98354    | 49.26084 |
| Totals : |               |      |             | 492.69651   | 37.83651    |          |

| Peak #   | RetTime [min] | Type | Width [min] | Area [pA*s] | Height [pA] | Area %   |
|----------|---------------|------|-------------|-------------|-------------|----------|
| 1        | 13.887        | PB   | 0.1172      | 34.80628    | 4.35784     | 2.02732  |
| 2        | 14.226        | BBA  | 0.3319      | 1682.05396  | 62.12404    | 97.97268 |
| Totals : |               |      |             | 1716.86024  | 66.48188    |          |

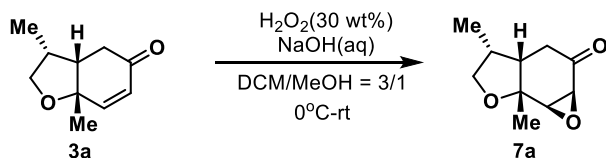

**(1a*S*,3a*S*,4*R*,6a*R*,6b*R*)-4,6a-Dimethylhexahydrooxireno[2,3-*g*]benzofuran-2(1a*H*)-one (7a)** A dried Schlenk flask was charged with **3a** (33.2 mg, 0.2 mmol, 1.0 equiv), DCM/MeOH (0.2 mL/0.6 mL). It was cooled to 0°C, then 30% wt H<sub>2</sub>O<sub>2</sub> (0.4 mL) and 20% wt NaOH (0.2 mL) were added carefully. The reaction mixture was stirred at room temperature for 30 min. Na<sub>2</sub>S<sub>2</sub>O<sub>3</sub> was added to quench the reaction. Then it was diluted with water (20 mL) and extracted with DCM (20 mL×3). The combined organic phases were dried over anhydrous Na<sub>2</sub>SO<sub>4</sub> and concentrated under reduced pressure. The residue was purified by flash column chromatography using petroleum ether/ethyl acetate eluent (PE/EA = 4:1) to afford the desired product **7a** as colorless oil (22.5 mg, 62% yield).

**<sup>1</sup>H NMR** (400 MHz, CDCl<sub>3</sub>) δ (ppm) 3.91 (dd, *J* = 8.8, 6.0 Hz, 1H), 3.46 (d, *J* = 3.8 Hz, 1H), 3.38 (dd, *J* = 8.8, 6.2 Hz, 1H), 3.29 (d, *J* = 3.8 Hz, 1H), 2.80 (dd, *J* = 15.2, 7.3 Hz, 1H), 2.52 – 2.40 (m, 2H), 2.22 (dd, *J* = 15.2, 1.3 Hz, 1H), 1.55 (s, 3H), 0.94 (d, *J* = 6.8 Hz, 3H).

**<sup>13</sup>C NMR** (100 MHz, CDCl<sub>3</sub>) δ (ppm) 207.2, 78.4, 73.4, 64.4, 55.5, 48.5, 38.7, 33.1, 25.4, 12.6.

**EI-MS:** [M]<sup>+</sup> 182; **HRMS (EI):** [M]<sup>+</sup> calcd for C<sub>10</sub>H<sub>14</sub>O<sub>3</sub><sup>+</sup> 182.0943, found 182.0941.

**Specific Rotation:** [α]<sub>D</sub><sup>25.0</sup> 16.9 (*c* 0.77, CHCl<sub>3</sub>) for 94% *ee*.

**Chiral HPLC analysis:** Phenomenex Lux 5u Cellulose-2 (PC-2) (250 mm); detected at 214 nm; *n*-hexane/*i*-propanol = 95/5; flow rate = 0.7 mL/min; Retention time: 11.0 min (major), 12.3 min (minor).

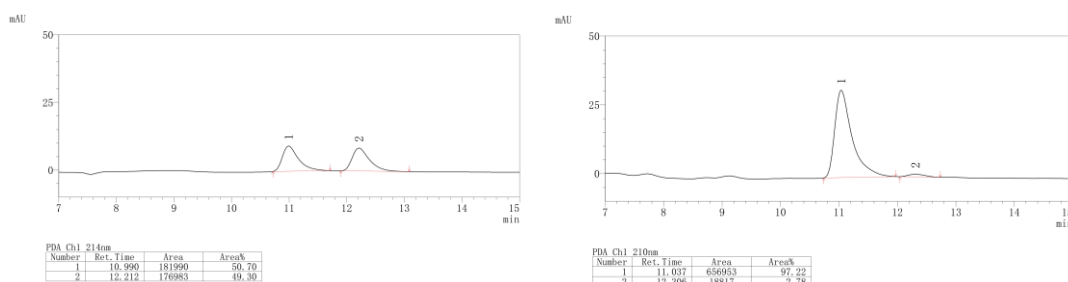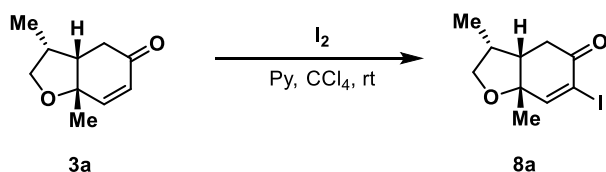

**(3*R*,3*aS*,7*aR*)-6-iodo-3,7*a*-Dimethyl-2,3,3*a*,7*a*-tetrahydrobenzofuran-5(4*H*)-one (8*a*)** A dried Schlenk flask was charged with **3a** (33.2 mg, 0.2 mmol, 1.0 equiv), I<sub>2</sub> (114.3 mg, 0.45 mmol, 3.0 equiv), pyridine/CCl<sub>4</sub> (1.5 mL/1.5 mL). The reaction mixture was stirred at room temperature overnight. Then, the reaction mixture was concentrated under reduced pressure and purified by flash column chromatography using petroleum ether/ethyl acetate eluent (PE/EA = 4:1) to afford the desired product **8a** as colorless oil (25 mg, 57% yield).

**<sup>1</sup>H NMR** (400 MHz, CDCl<sub>3</sub>) δ (ppm) 7.40 (d, *J* = 0.7 Hz, 1H), 4.10 (dd, *J* = 8.8, 7.4 Hz, 1H), 3.40 (dd, *J* = 8.8, 7.3 Hz, 1H), 2.83 (dd, *J* = 17.0, 4.0 Hz, 1H), 2.72 – 2.53 (m, 3H), 1.46 (s, 3H), 0.88 (d, *J* = 7.0 Hz, 3H).

**<sup>13</sup>C NMR** (100 MHz, CDCl<sub>3</sub>) δ (ppm) 191.3, 161.2, 104.0, 82.2, 73.9, 46.1, 36.5, 34.4, 25.4, 13.8.

**EI-MS:** [M]<sup>+</sup> 292; **HRMS (EI):** [M]<sup>+</sup> calcd for C<sub>10</sub>H<sub>13</sub>O<sub>2</sub>I<sup>+</sup> 291.9960, found 291.9966.

**Specific Rotation:** [α]<sub>D</sub><sup>25.0</sup> -27.5 (*c* 0.93, CHCl<sub>3</sub>) for 94% *ee*.

**Chiral HPLC analysis:** Phenomenex Lux 5u Cellulose-2 (PC-2) (250 mm); detected at 214 nm; *n*-hexane/*i*-propanol = 95/5; flow rate = 0.7 mL/min; Retention time: 15.4 min (major), 11.3 min (minor).

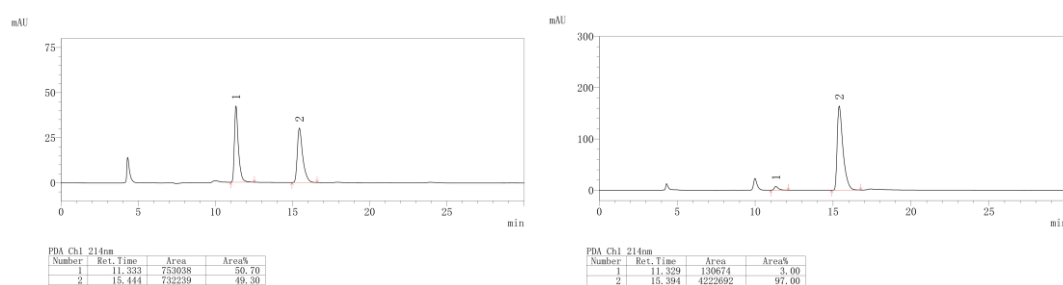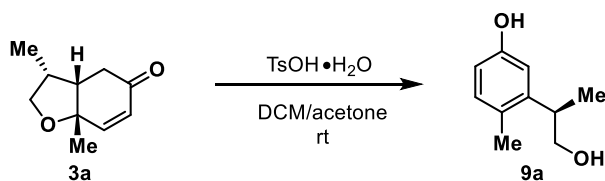

**(*R*)-3-(1-Hydroxypropan-2-yl)-4-methylphenol (9*a*)** A dried Schlenk flask was charged with **3a** (33.2 mg, 0.2 mmol, 1.0 equiv), *p*-toluenesulfonic acid monohydrate (76 mg, 2.0 equiv) and DCM/acetone (1.0 mL/1.0 mL). The reaction mixture was stirred at room temperature for 3 h. Then, the reaction mixture was filtered, washed with EtOAc (10 mL × 3) and concentrated in vacuo. The residue was purified by flash column chromatography using petroleum ether/ethyl acetate eluent (PE/EA = 2:1) to afford the desired product **9a** as colorless oil (16 mg, 48% yield).

**<sup>1</sup>H NMR** (400 MHz, CDCl<sub>3</sub>) δ (ppm) 7.00 (d, *J* = 8.2 Hz, 1H), 6.68 (d, *J* = 2.6 Hz, 1H), 6.59 (dd, *J* = 8.2, 2.6 Hz, 1H), 5.98 (s, 1H), 3.73 – 3.60 (m, 2H), 3.24 – 3.11 (m, 1H), 2.24 (s, 3H), 1.95 (s, 1H), 1.18 (d, *J* = 7.0 Hz, 3H).

$^{13}\text{C}$  NMR (100 MHz,  $\text{CDCl}_3$ )  $\delta$  (ppm) 154.3, 143.1, 131.6, 128.2, 113.3, 112.7, 67.8, 37.3, 18.7, 17.5.

EI-MS:  $[M]^\oplus$  168; HRMS (EI):  $[M]^\oplus$  calcd for  $\text{C}_{10}\text{H}_{14}\text{O}_2^\oplus$  166.0994, found 166.0999.

Specific Rotation:  $[\alpha]_{\text{D}}^{25.0}$  12.5 ( $c$  0.54,  $\text{CHCl}_3$ ) for 93% *ee*.

Chiral HPLC analysis: Phenomenex Lux 5u Cellulose-2 (PC-2) (250 mm); detected at 214 nm; *n*-hexane/*i*-propanol = 80/20; flow rate = 1.0 mL/min; Retention time: 5.5 min (major), 6.6 min (minor).

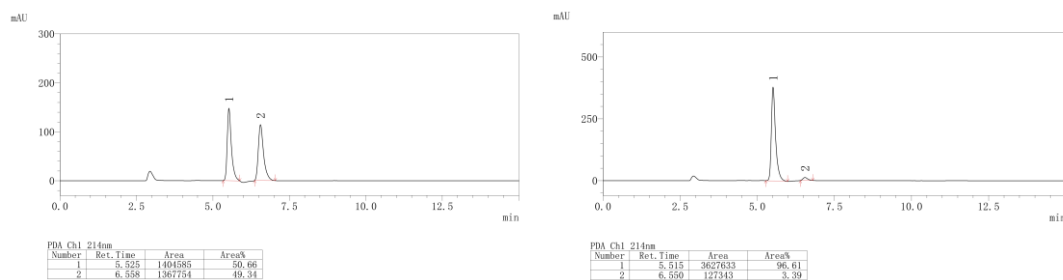

## 8. One-pot process to polycyclic products

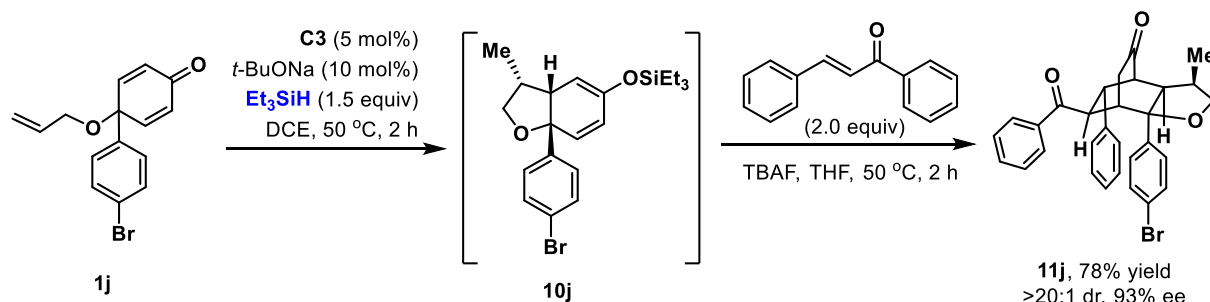

**(3*R*,3*aR*,4*R*,7*S*,7*aS*,8*S*,9*R*)-8-Benzoyl-7*a*-(4-bromophenyl)-3-methyl-9-phenylhexahydro-4,7-ethanobenzofuran-5(4*H*)-one (11j)** A dried Schlenk flask was charged with **C3** (2.8 mg, 5 mol%), *t*-BuONa (1.0 mg, 10 mol%), and substrate **1j** (0.1 mmol, 1.0 equiv), backfilled with argon. Then anhydrous DCE (1 mL),  $\text{Et}_3\text{SiH}$  (0.15 mmol, 1.5 equiv) were added. After the mixture was stirred at 50 °C for 2 h, the reaction mixture was cooled to room temperature and concentrated in vacuo. Then (*E*)-chalcone (0.2 mmol, 2.0 equiv), TBAF (2.0 equiv, 0.2 mL, 1.0M in THF) and THF (1.0 mL) were added and the mixture was stirred at 50 °C for another 2 h. Finally, the reaction mixture was filtered, washed with EtOAc (10 mL  $\times$  3) and concentrated in vacuo. The residue was purified by flash silica gel chromatography (PE/EA = 9:1) to afford the desired product **11j** (white solid, 40 mg, 78% yield, m.p. = 95 – 96 °C).

$^1\text{H}$  NMR (500 MHz,  $\text{CDCl}_3$ )  $\delta$  (ppm) 7.45 – 7.41 (m, 1H), 7.29 – 7.25 (m, 4H), 7.24 – 7.16 (m, 7H), 6.98 (d,  $J$  = 8.7 Hz, 2H), 4.47 (dd,  $J$  = 5.9, 2.2 Hz, 1H), 3.81 (t,  $J$  = 8.5 Hz, 1H), 3.68 (dd,  $J$  = 5.9,

2.5 Hz, 1H), 3.33 (dd,  $J = 6.1, 2.5$  Hz, 1H), 3.29 (dd,  $J = 8.2, 2.0$  Hz, 1H), 3.24 (dd,  $J = 10.0, 8.7$  Hz, 1H), 3.17 (dd,  $J = 18.9, 3.5$  Hz, 1H), 3.12 (t,  $J = 2.2$  Hz, 1H), 2.58 – 2.48 (m, 1H), 2.43 (dd,  $J = 18.8, 2.3$  Hz, 1H), 1.13 (d,  $J = 7.0$  Hz, 3H).

$^{13}\text{C}$  NMR (125 MHz,  $\text{CDCl}_3$ )  $\delta$  (ppm) 215.6, 199.0, 143.6, 140.6, 135.6, 132.9, 130.9, 129.0, 128.7, 128.2, 127.4, 127.0, 126.9, 121.9, 85.9, 74.4, 52.9, 50.2, 49.9, 45.6, 41.7, 40.8, 36.9, 11.9.

FT-MS:  $[\text{M}+\text{H}]^{\oplus}$  515.1; HRMS (DART):  $[\text{M}+\text{H}]^{\oplus}$  calcd for  $\text{C}_{30}\text{H}_{28}\text{O}_3^{79}\text{Br}^{\oplus}$  515.1216, found 515.1201.

Specific Rotation:  $[\alpha]_{\text{D}}^{25.0}$  57.7 ( $c$  1.65,  $\text{CHCl}_3$ ) for 93% *ee*.

Chiral HPLC analysis: Chiralpak AD-H Column (250 mm); detected at 214 nm; *n*-hexane/*i*-propanol = 80/20; flow rate = 1.0 mL/min; Retention time: 8.6 min (major), 7.6 min (minor).

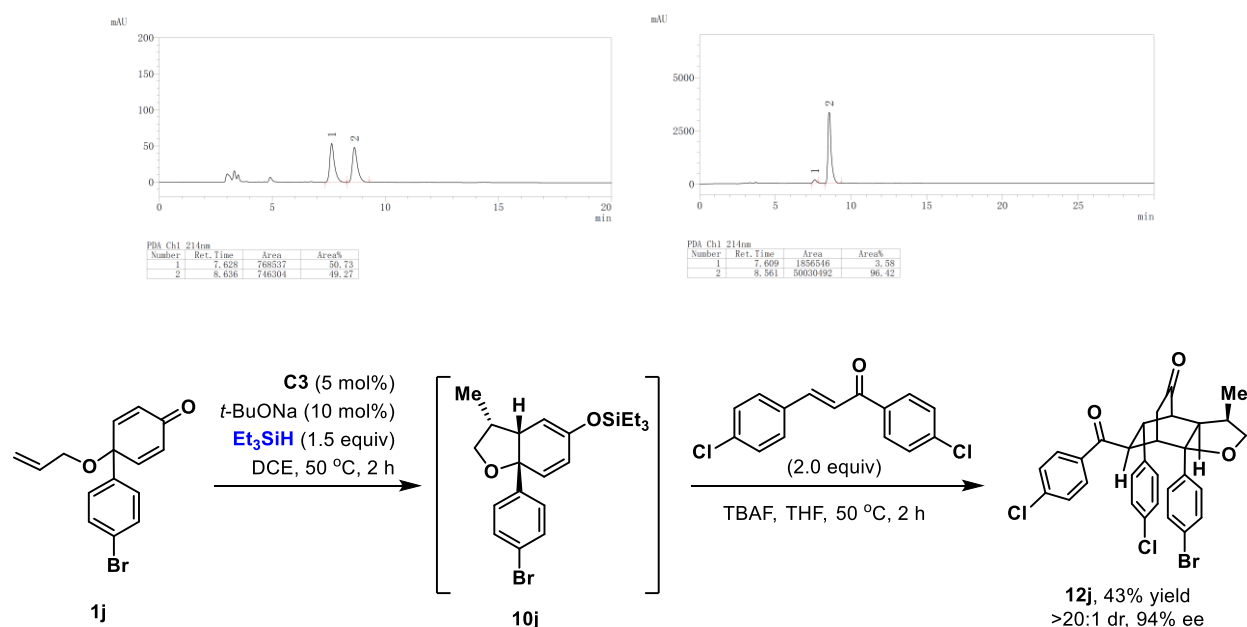

**(3*R*,3*aR*,4*R*,7*S*,7*aS*,8*S*,9*R*)-7*a*-(4-Bromophenyl)-8-(4-chlorobenzoyl)-9-(4-chlorophenyl)-3-methylhexahydro-4,7-ethanobenzofuran-5(4*H*)-one (**12j**)** A dried Schlenk flask was charged with **C3** (2.8 mg, 5 mol%), *t*-BuONa (1.0 mg, 10 mol%), and substrate **1j** (0.1 mmol, 1.0 equiv), backfilled with argon. Then anhydrous DCE (1 mL),  $\text{Et}_3\text{SiH}$  (0.15 mmol, 1.5 equiv) were added. After the mixture was stirred at 50 °C for 2 h, the reaction mixture was cooled to room temperature and concentrated in vacuo. Then  $(E)$ -1,3-bis(4-chlorophenyl)prop-2-en-1-one (0.2 mmol, 2.0 equiv), TBAF (2.0 equiv, 0.2 mL, 1.0M in THF) and THF (1.0 mL) were added and the mixture was stirred at 50 °C for another 2 h. Finally, the reaction mixture was filtered, washed with EtOAc (10 mL  $\times$  3) and concentrated in vacuo. The residue was purified by flash silica gel chromatography (PE/EA = 9:1) to afford the desired product **12j** (yellow solid, 25 mg, 43% yield, m.p. = 109 – 110 °C).

**<sup>1</sup>H NMR** (400 MHz, CDCl<sub>3</sub>) δ (ppm) 7.27 – 7.18 (m, 6H), 7.15 (d, *J* = 8.4 Hz, 2H), 7.09 (d, *J* = 8.3 Hz, 2H), 6.98 (d, *J* = 8.4 Hz, 2H), 4.41 (d, *J* = 4.4 Hz, 1H), 3.81 (t, *J* = 8.4 Hz, 1H), 3.51 (d, *J* = 3.8 Hz, 1H), 3.22 (dd, *J* = 24.5, 13.9 Hz, 4H), 3.08 (s, 1H), 2.53 (dt, *J* = 15.7, 7.7 Hz, 1H), 2.38 (d, *J* = 18.8 Hz, 1H), 1.12 (d, *J* = 6.9 Hz, 3H).

**<sup>13</sup>C NMR** (100 MHz, CDCl<sub>3</sub>) δ (ppm) 214.9, 197.7, 142.0, 140.6, 139.4, 134.0, 132.9, 131.1, 129.1, 128.7, 128.6, 128.4, 122.2, 85.8, 74.5, 53.2, 50.2, 49.8, 45.7, 41.7, 40.3, 36.9, 12.0.

**FT-MS:** [M+H]<sup>+</sup> 583.0; **HRMS (DART):** [M+H]<sup>+</sup> calcd for C<sub>30</sub>H<sub>26</sub>O<sub>3</sub><sup>79</sup>Br<sup>35</sup>Cl<sub>2</sub><sup>+</sup> 583.0473, found 583.0427.

**Specific Rotation:** [α]<sub>D</sub><sup>25.0</sup> 71.6 (*c* 0.8, CHCl<sub>3</sub>) for 94% *ee*.

**Chiral HPLC analysis:** Chiralpak AD-H Column (250 mm); detected at 214 nm; *n*-hexane/*i*-propanol = 80/20; flow rate = 1.0 mL/min; Retention time: 8.4 min (major), 11.1 min (minor).

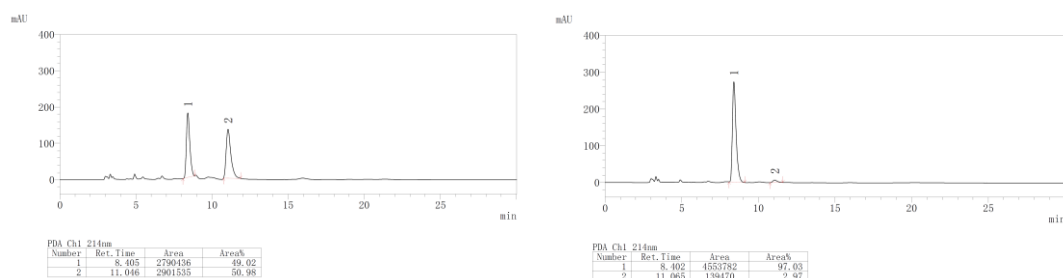

## 9. Proposed reaction mechanism

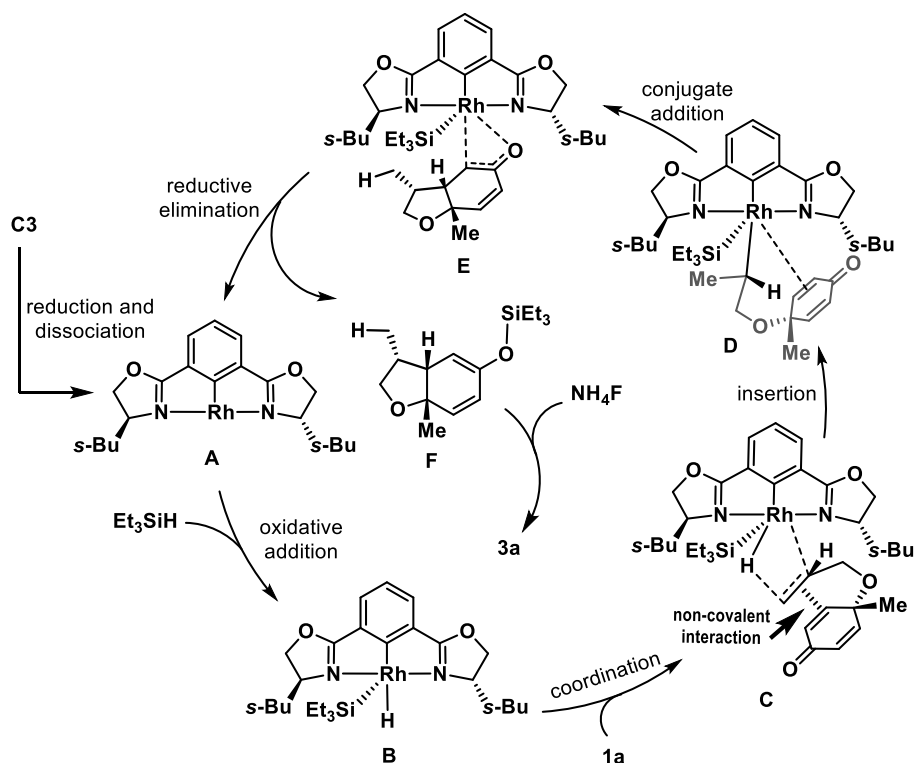

The reduction of rhodium precatalyst **C3** by triethylsilane and dissociation of water lead to the formation of Rh(I)-complex **A**, which may be the catalytic active species and triggers the Rh(I)/Rh(III) catalytic cycle. The oxidative addition of the Rh(I)-complex **A** with triethylsilane affords the Rh(III)-hydride complex **B**. Then, the coordination and *anti*-Markovnikov insertion of the cyclohexadienone-tethered terminal alkene **1a** to the Rh(III)-hydride complex **B** provides the Rh(III)-complex **D**, which subsequently undergoes conjugate addition and reductive elimination to offer the enol silyl ether product **F** and regenerates the Rh(I)-complex **A**. Finally, quenching silyl ether product **F** with ammonium fluoride produces the corresponding reductive cyclization product **3a**. Notably, the non-covalent interaction between the enone moiety and the terminal alkene may enhance the reactivity of the terminal alkene to some extent, which would avoid the direct reduction of the enone.



## 10. $^1\text{H}$ NMR, $^{13}\text{C}$ NMR, HMQC, and NOE Copies

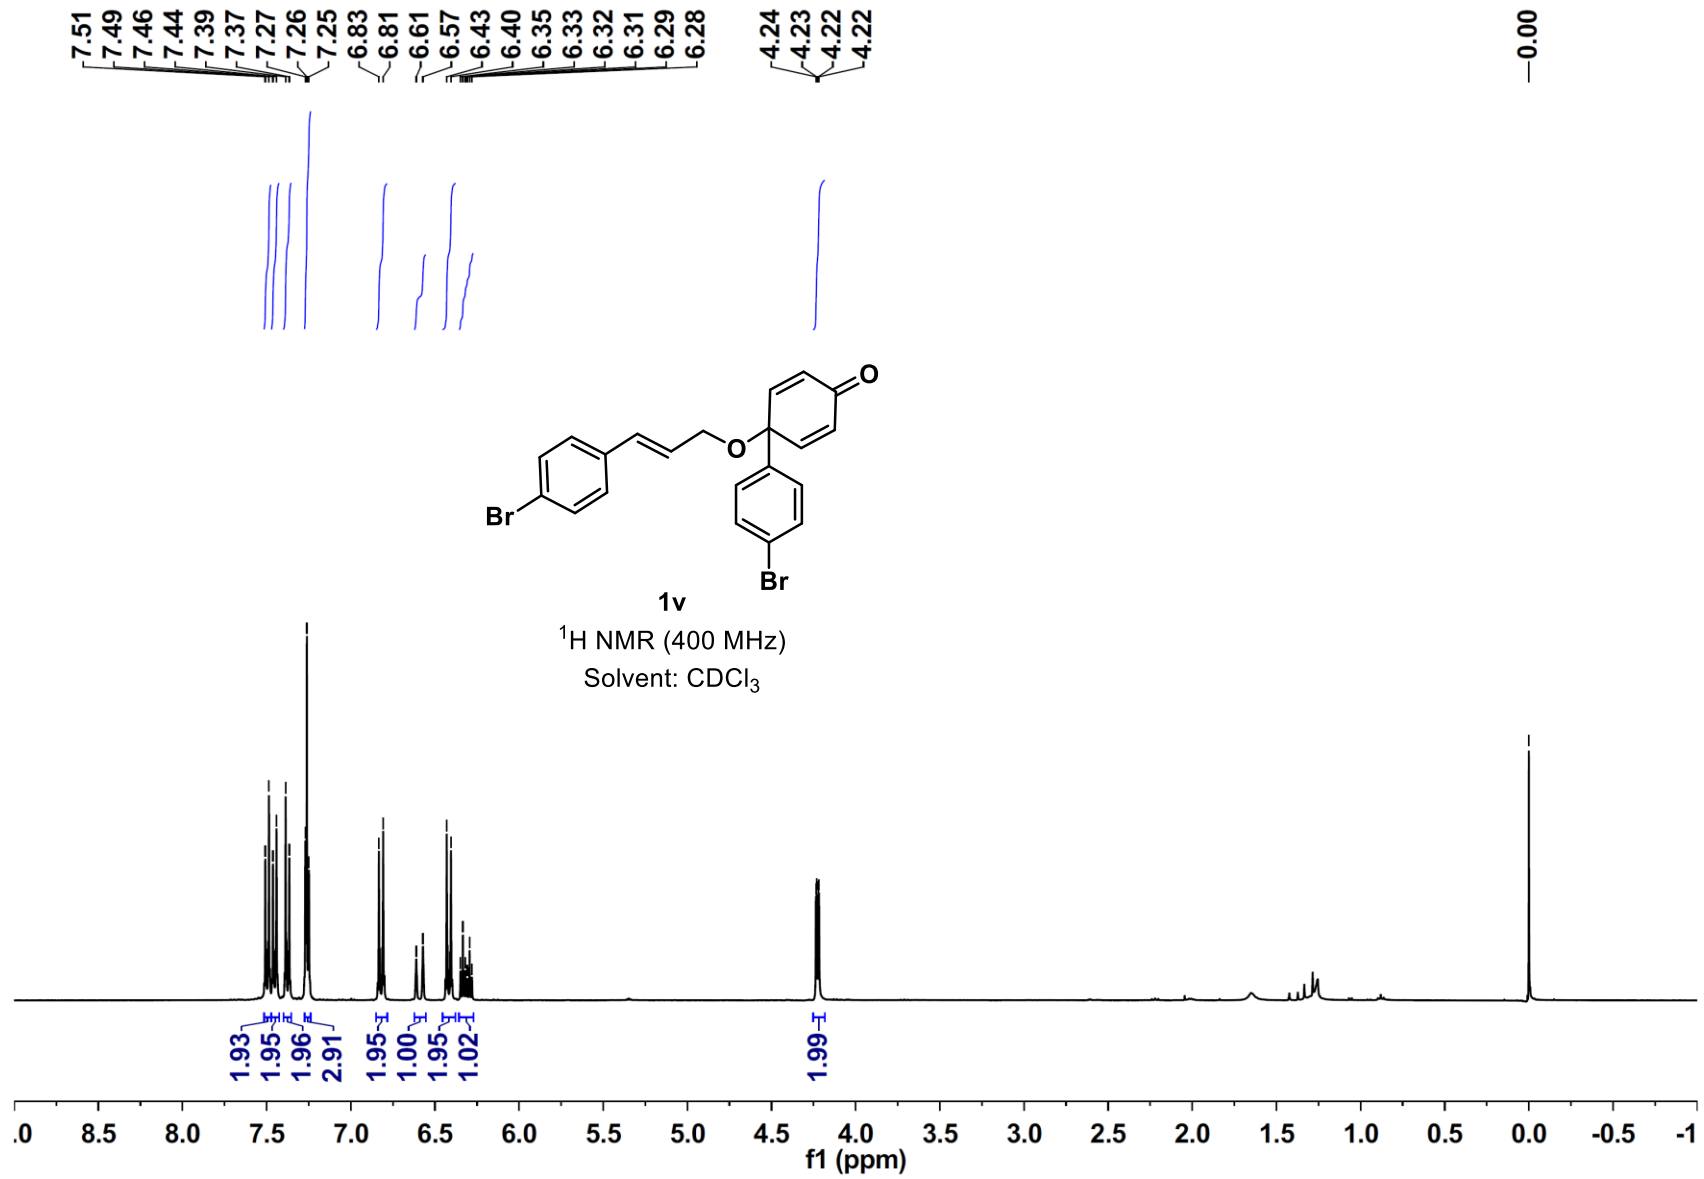

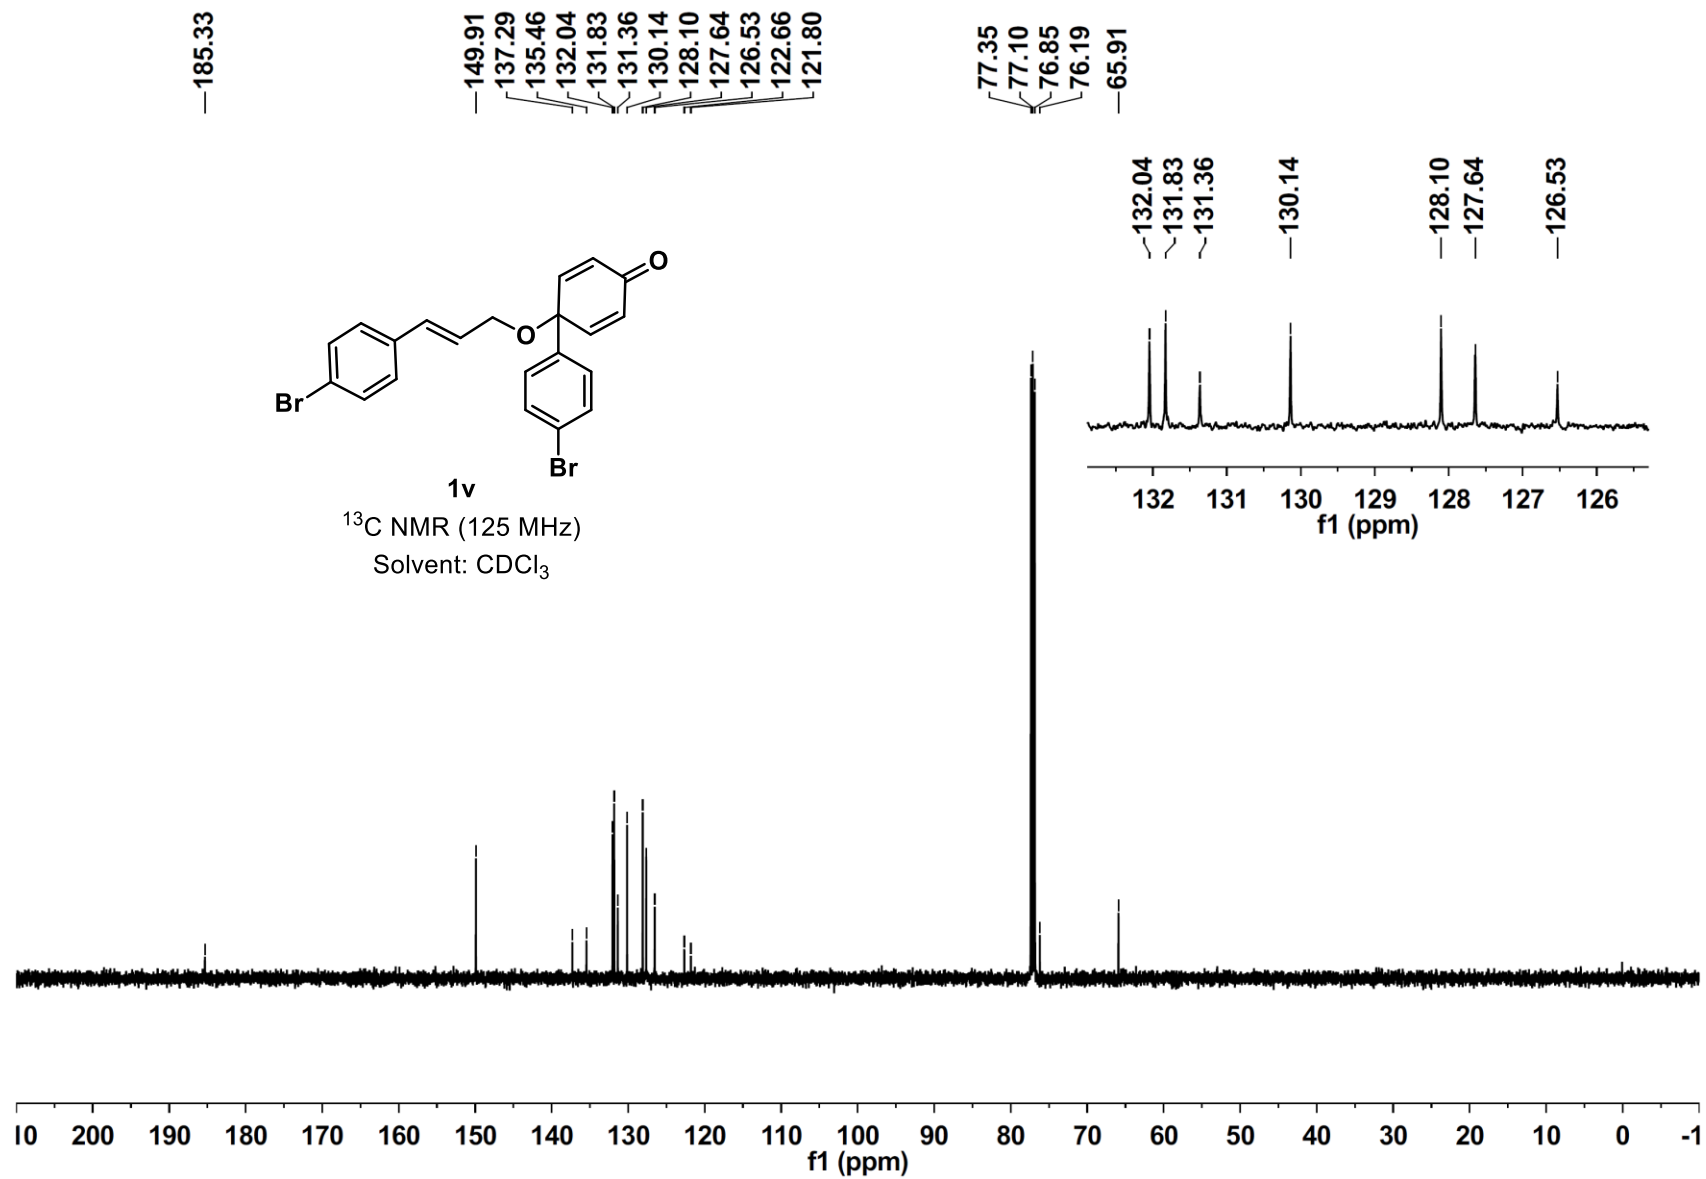

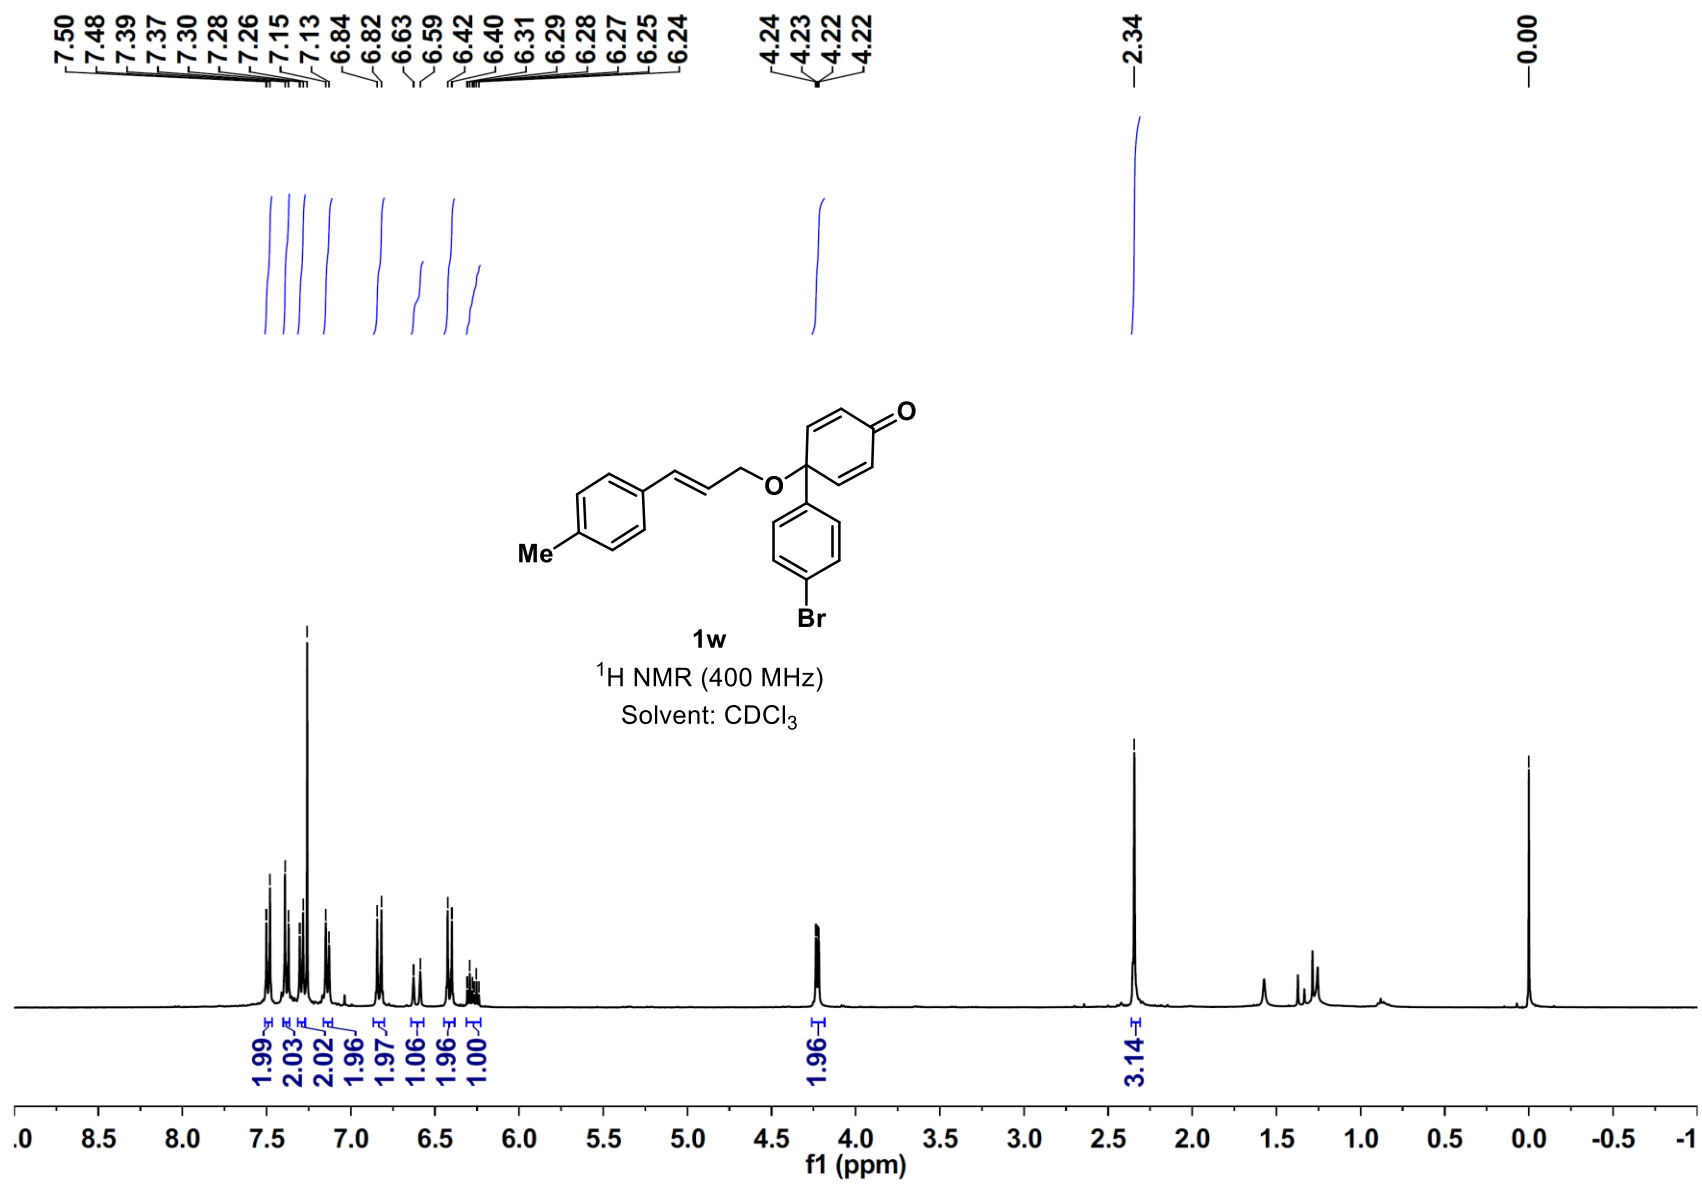

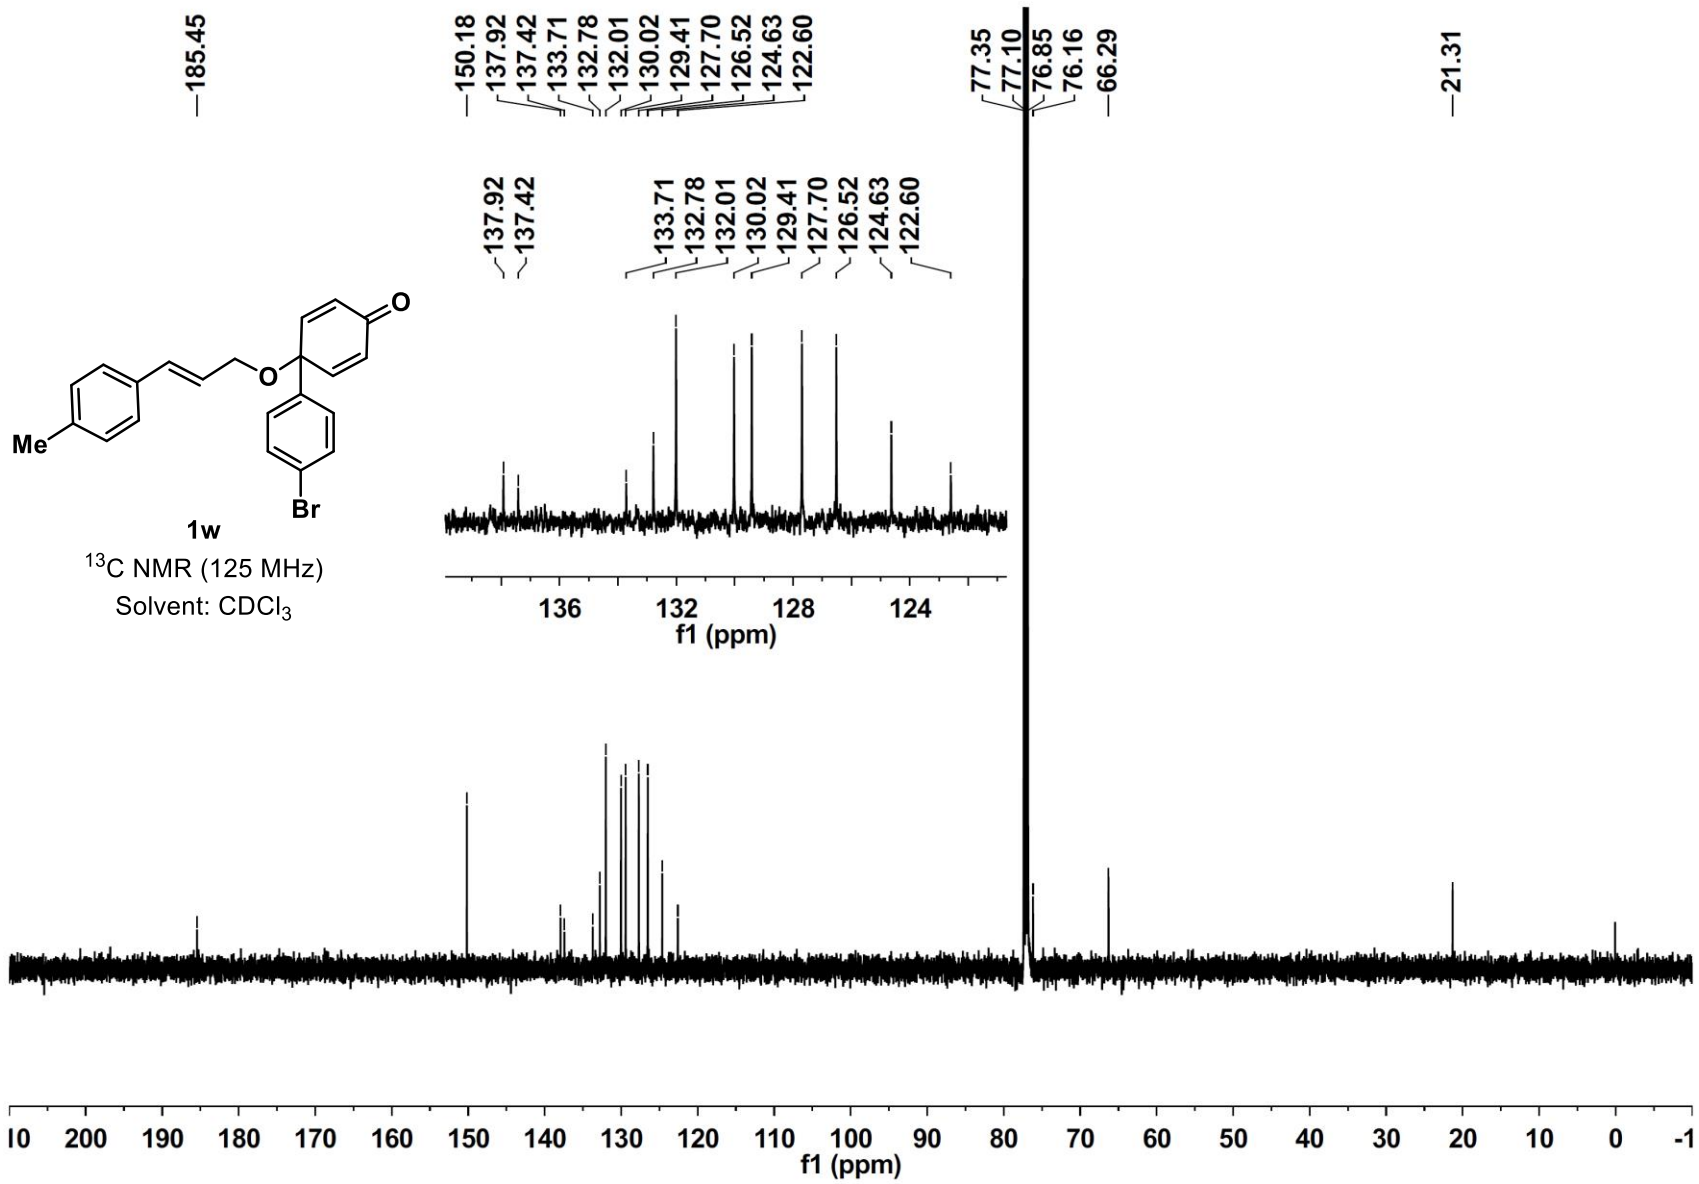

7.81  
7.80  
7.76  
7.63  
7.61  
7.55  
7.53  
7.47  
7.46  
7.41  
7.39  
7.37  
7.35  
7.26  
6.93  
6.91  
6.85  
6.81  
6.51  
6.49  
6.48  
6.47  
6.44  
6.42  
4.33  
4.31

-1.57

-0.00

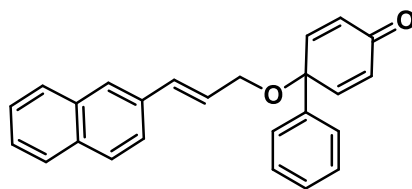

1x

<sup>1</sup>H NMR (400 MHz)  
Solvent: CDCl<sub>3</sub>

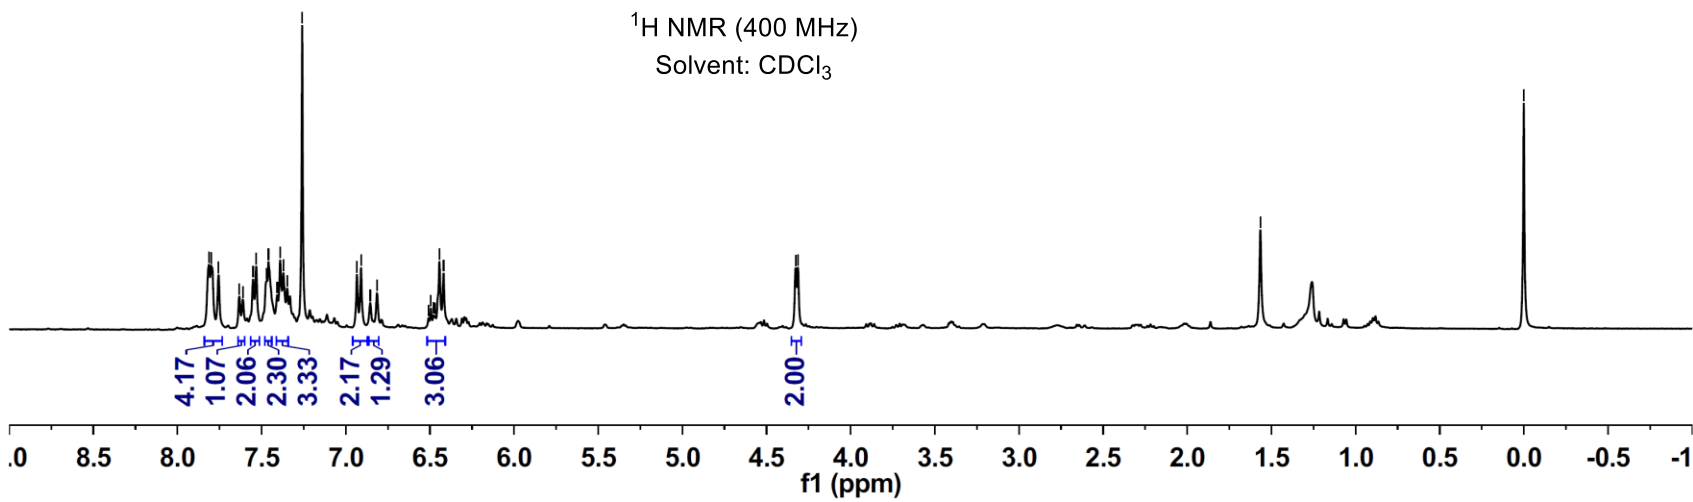

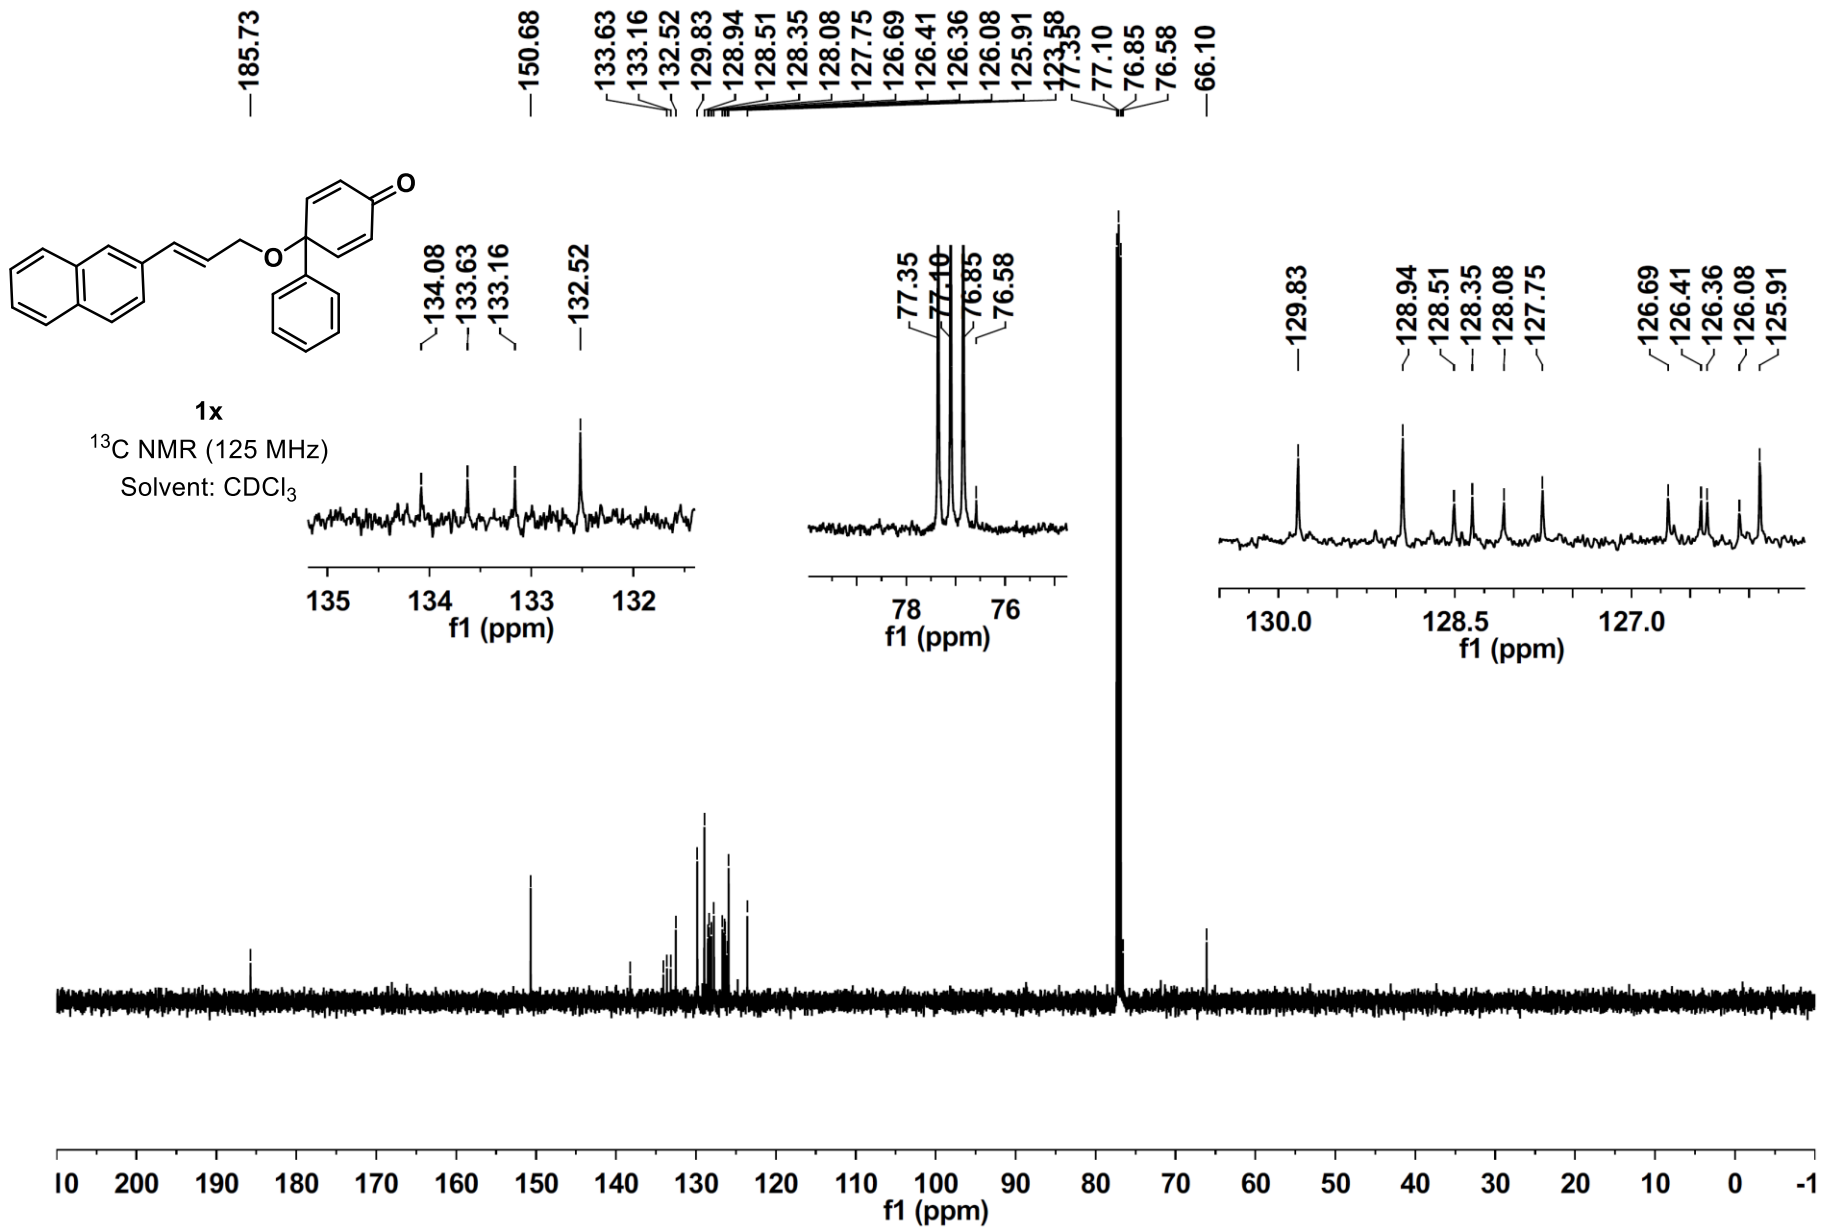

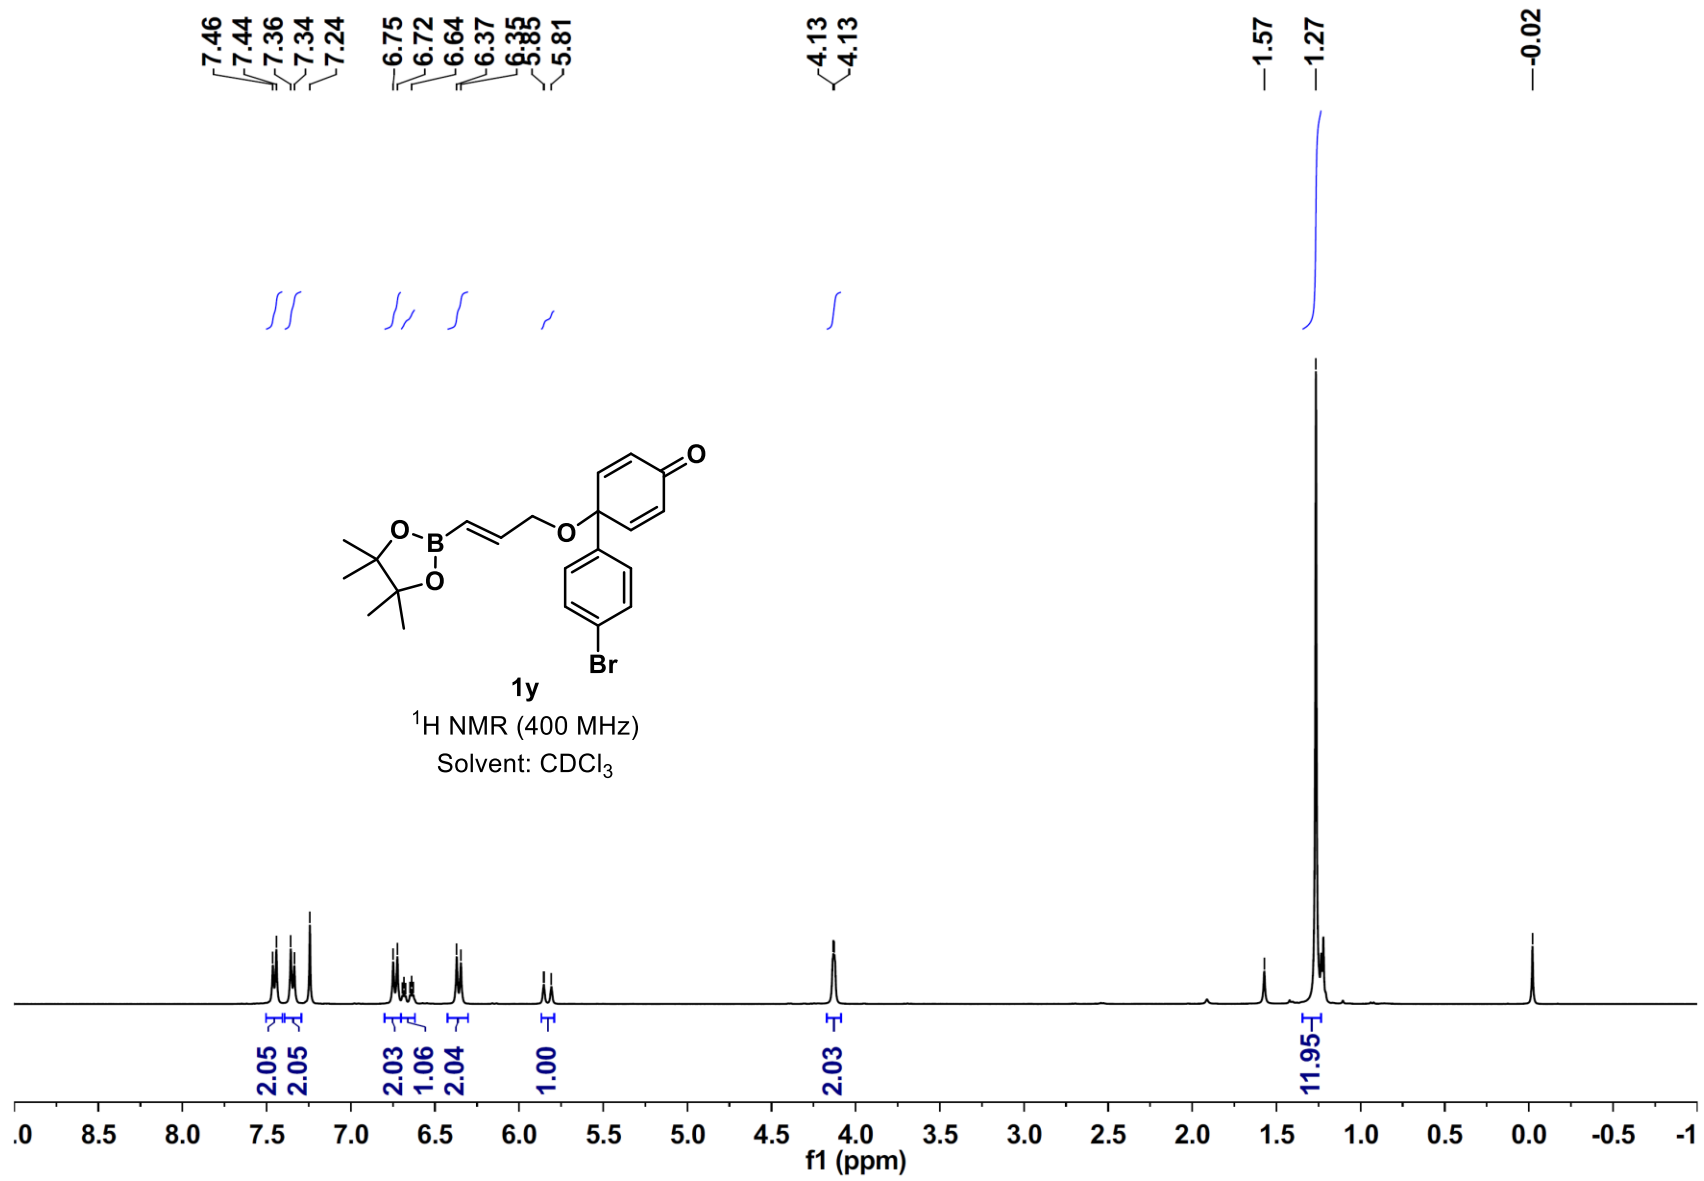



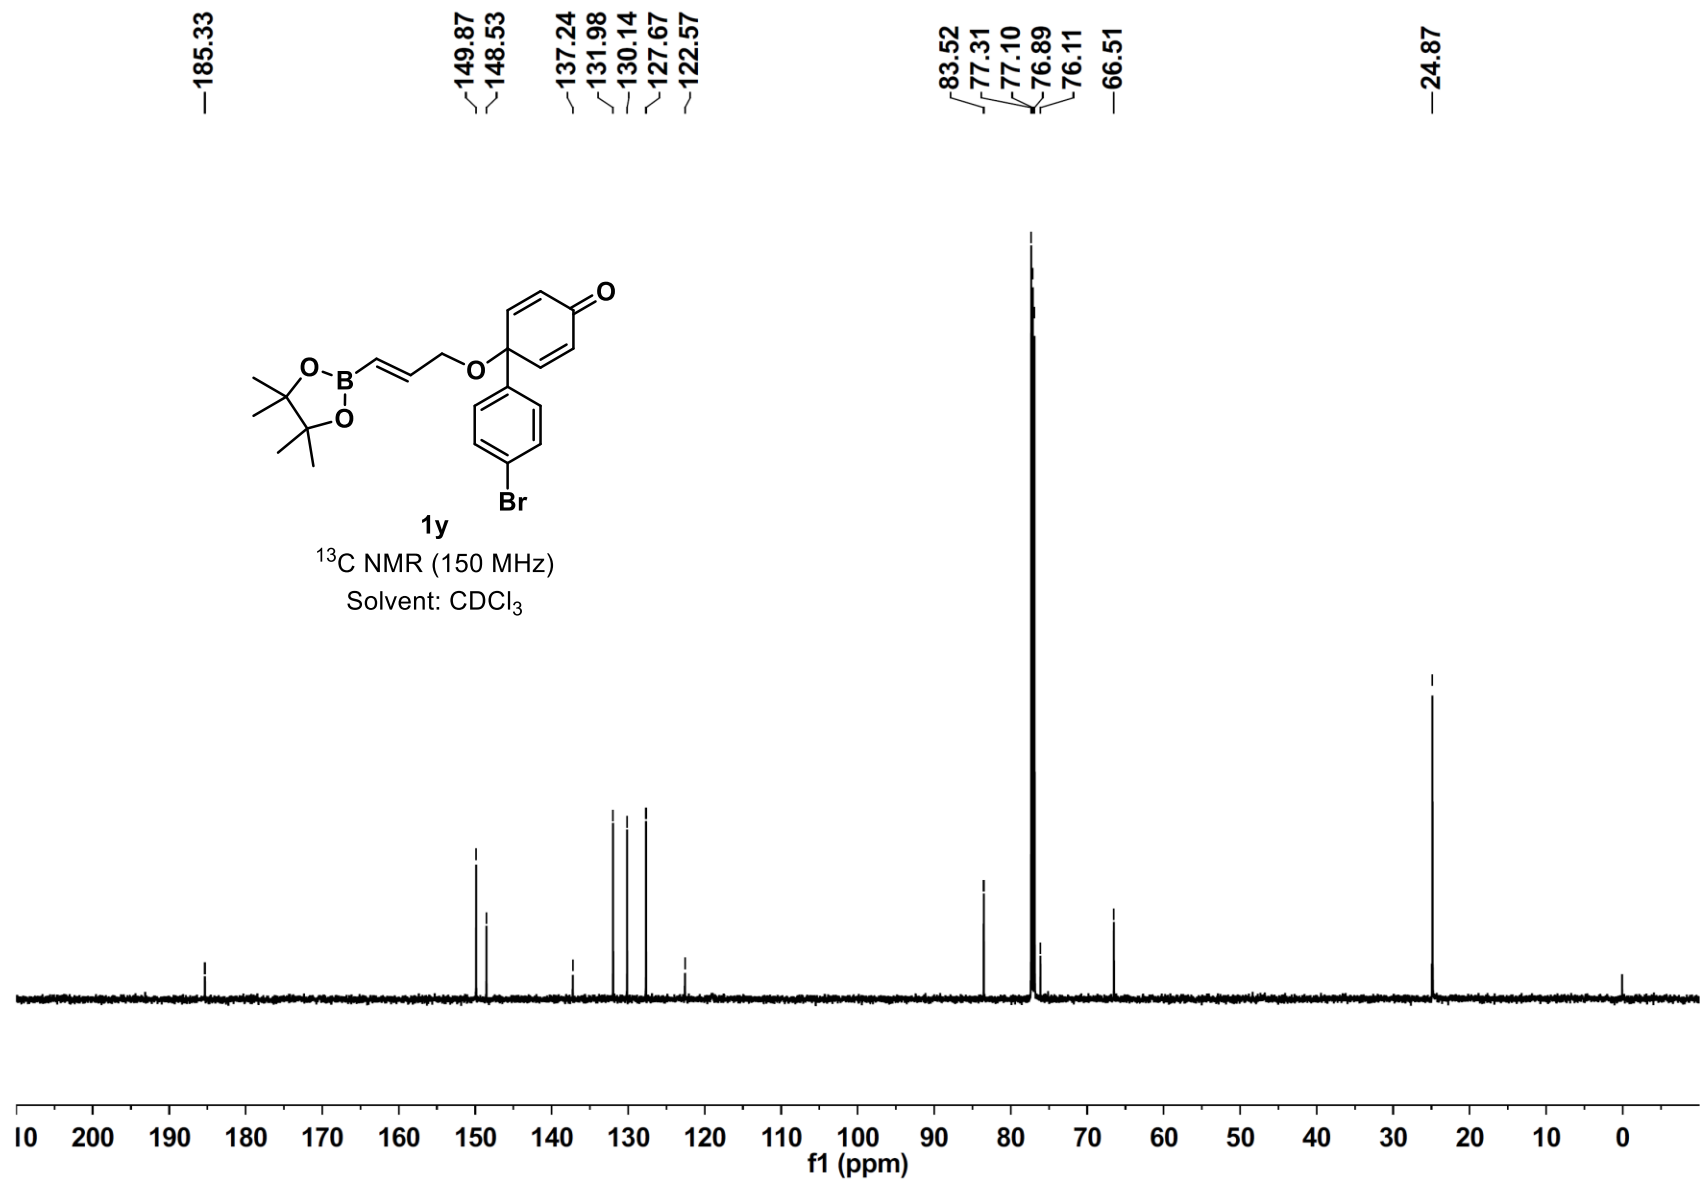

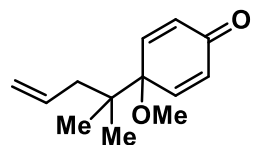

1aa

<sup>1</sup>H NMR (400 MHz)  
Solvent: CDCl<sub>3</sub>

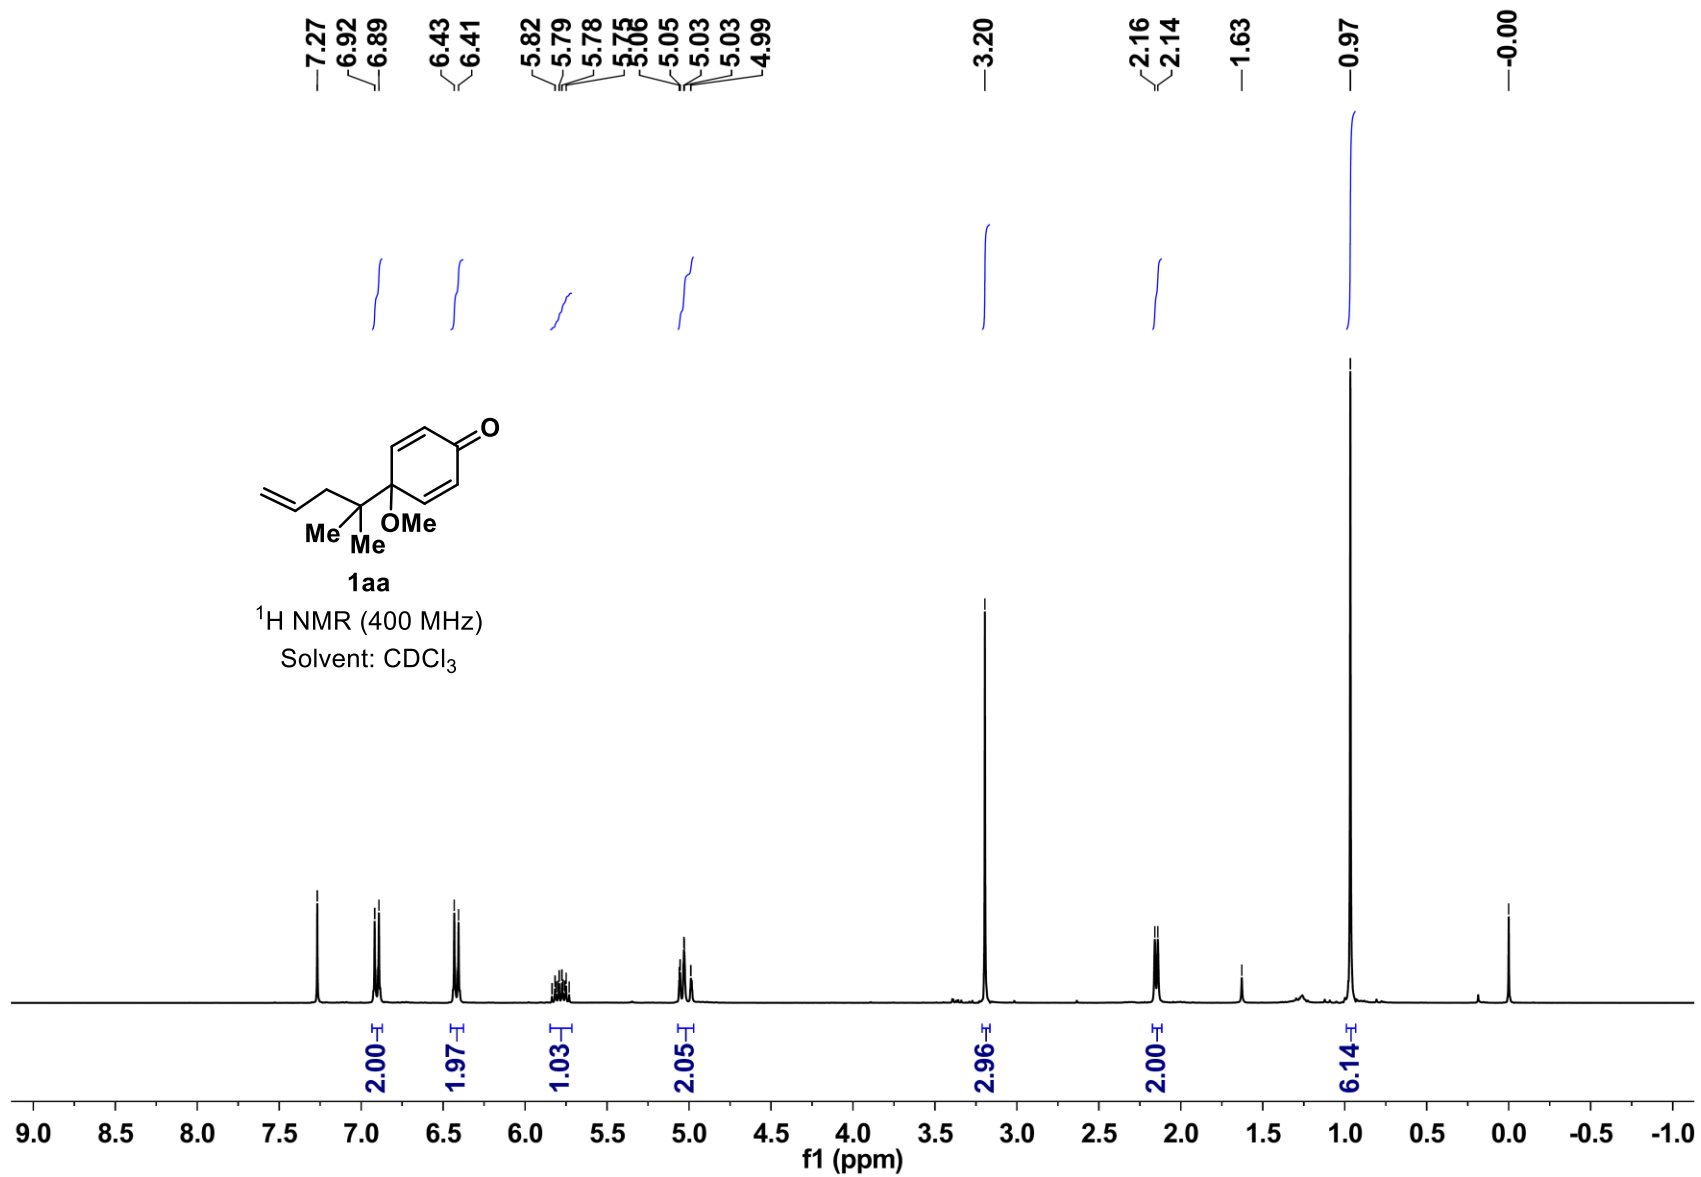

—185.20

—150.38

~134.81

~132.47

—117.84

80.13

77.42

77.10

76.78

—53.12

42.36

41.85

—22.11

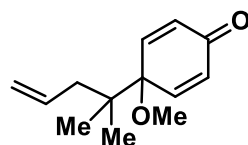

**1aa**

<sup>13</sup>C NMR (100 MHz)

Solvent: CDCl<sub>3</sub>

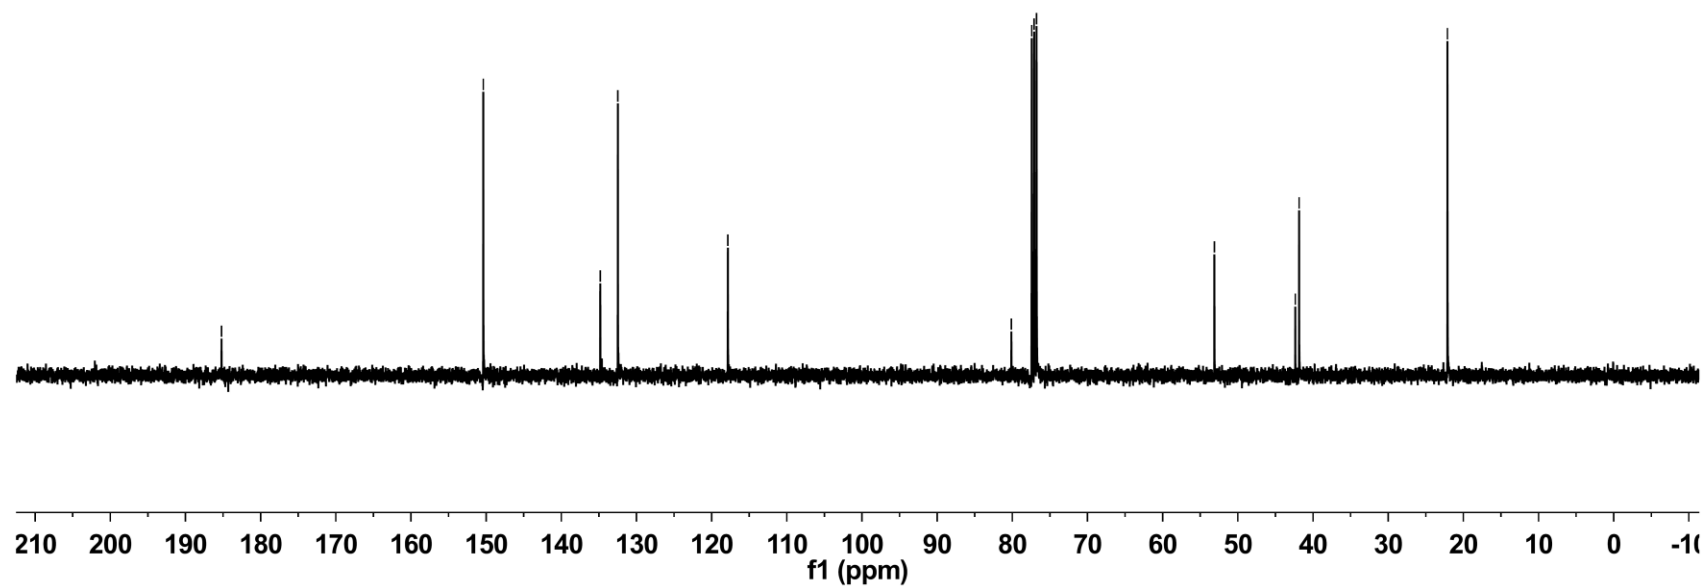

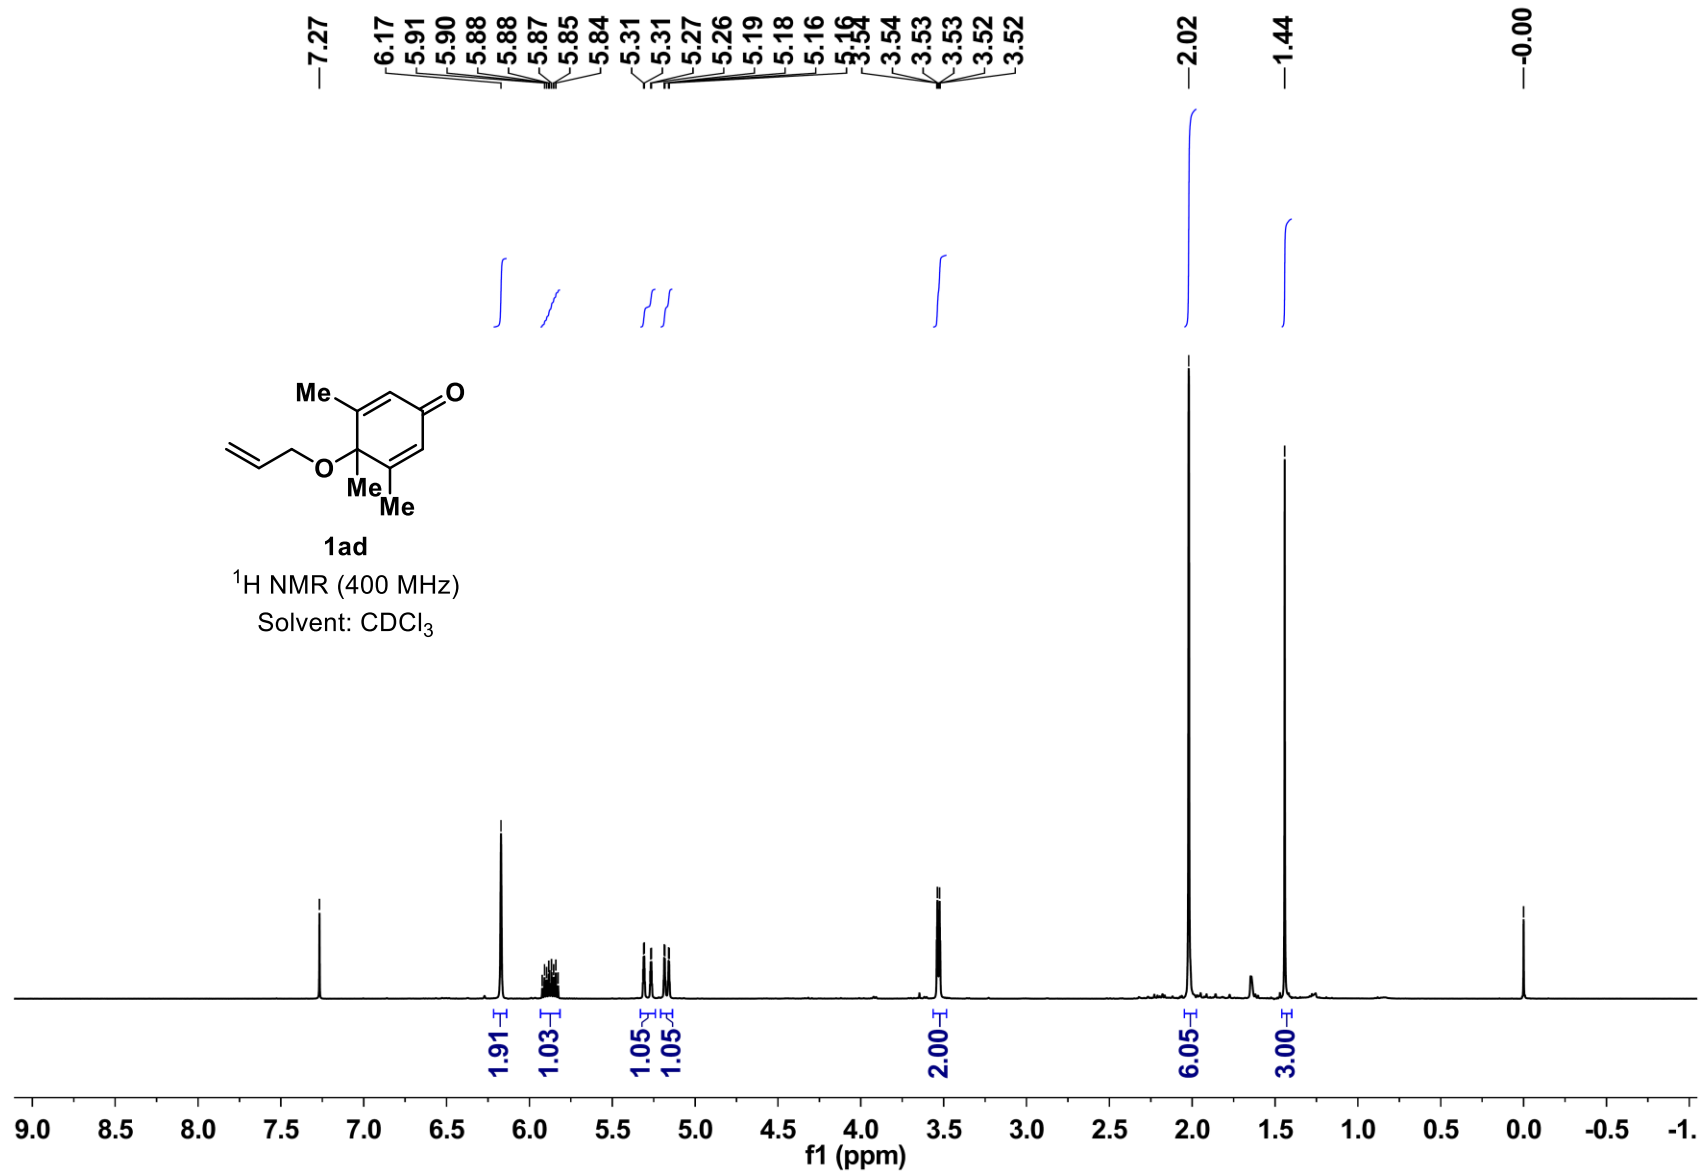

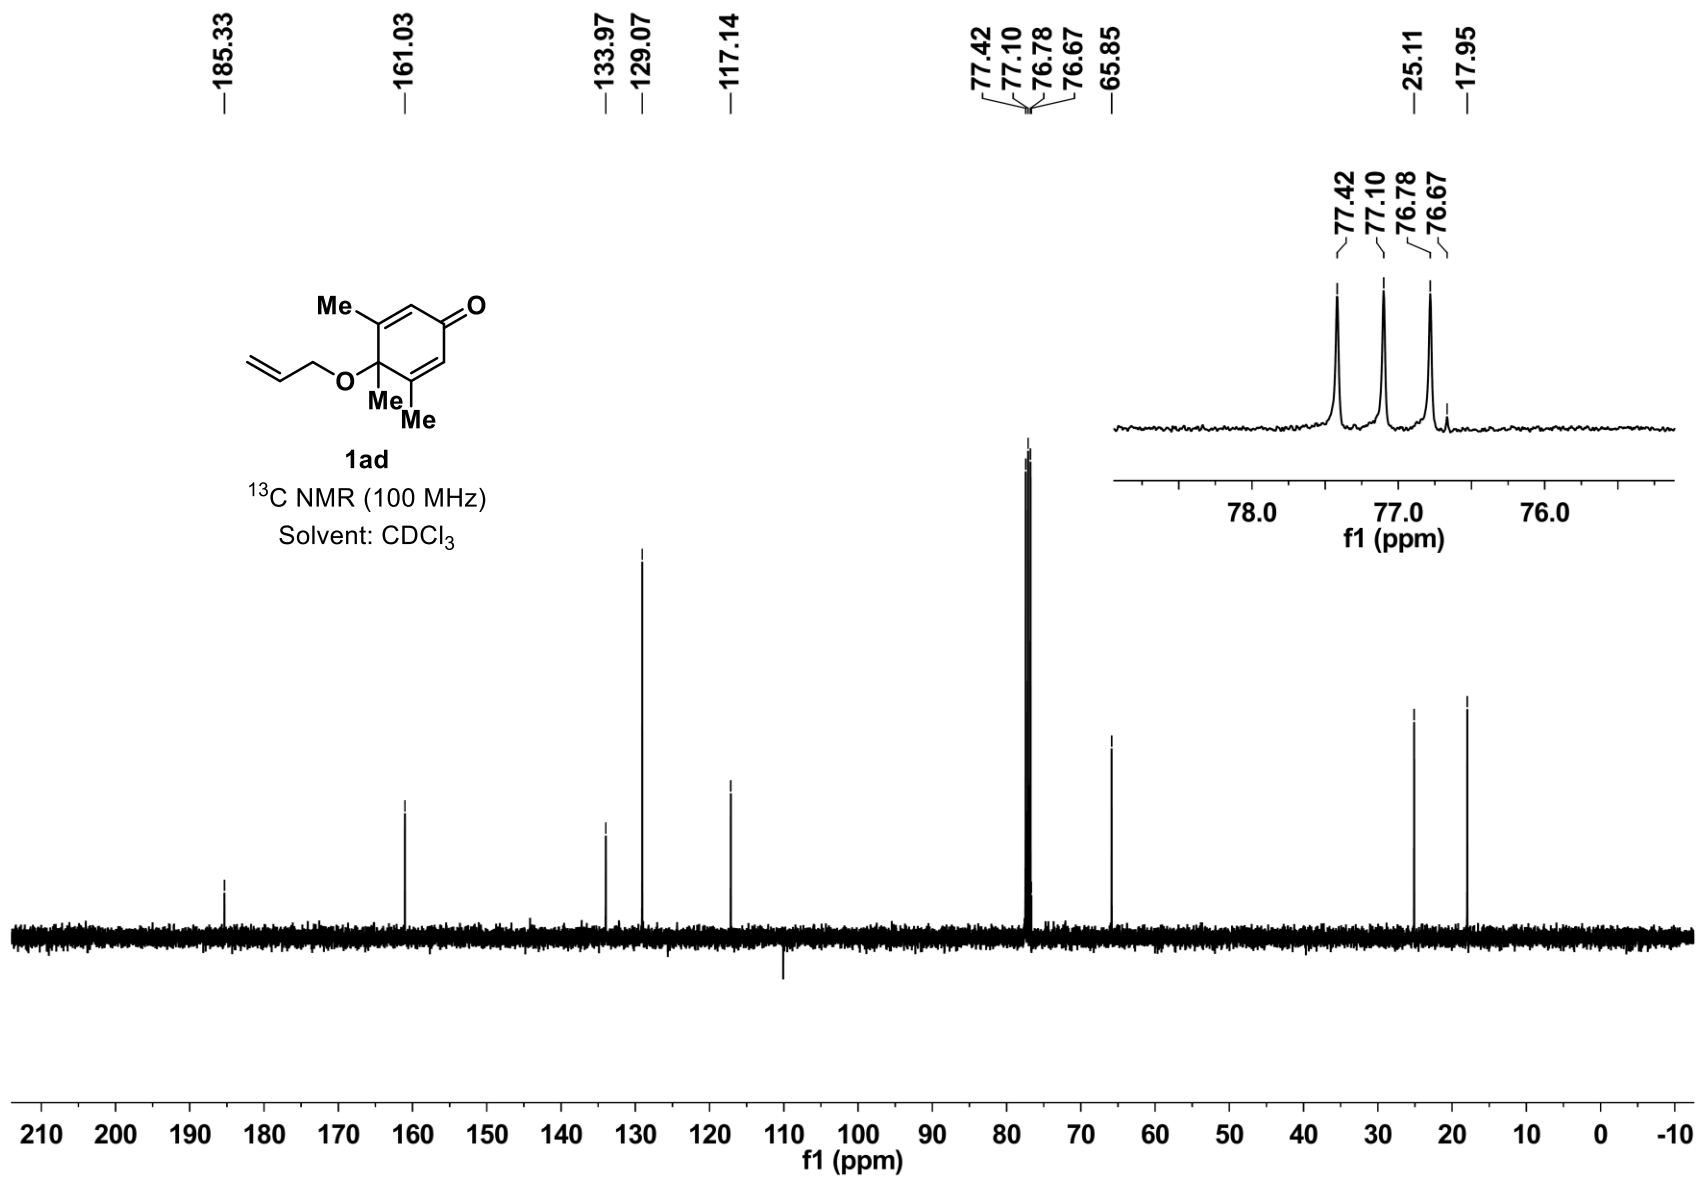

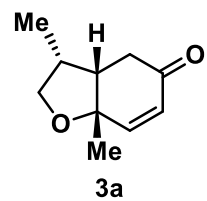

<sup>1</sup>H NMR (400 MHz)  
Solvent: CDCl<sub>3</sub>

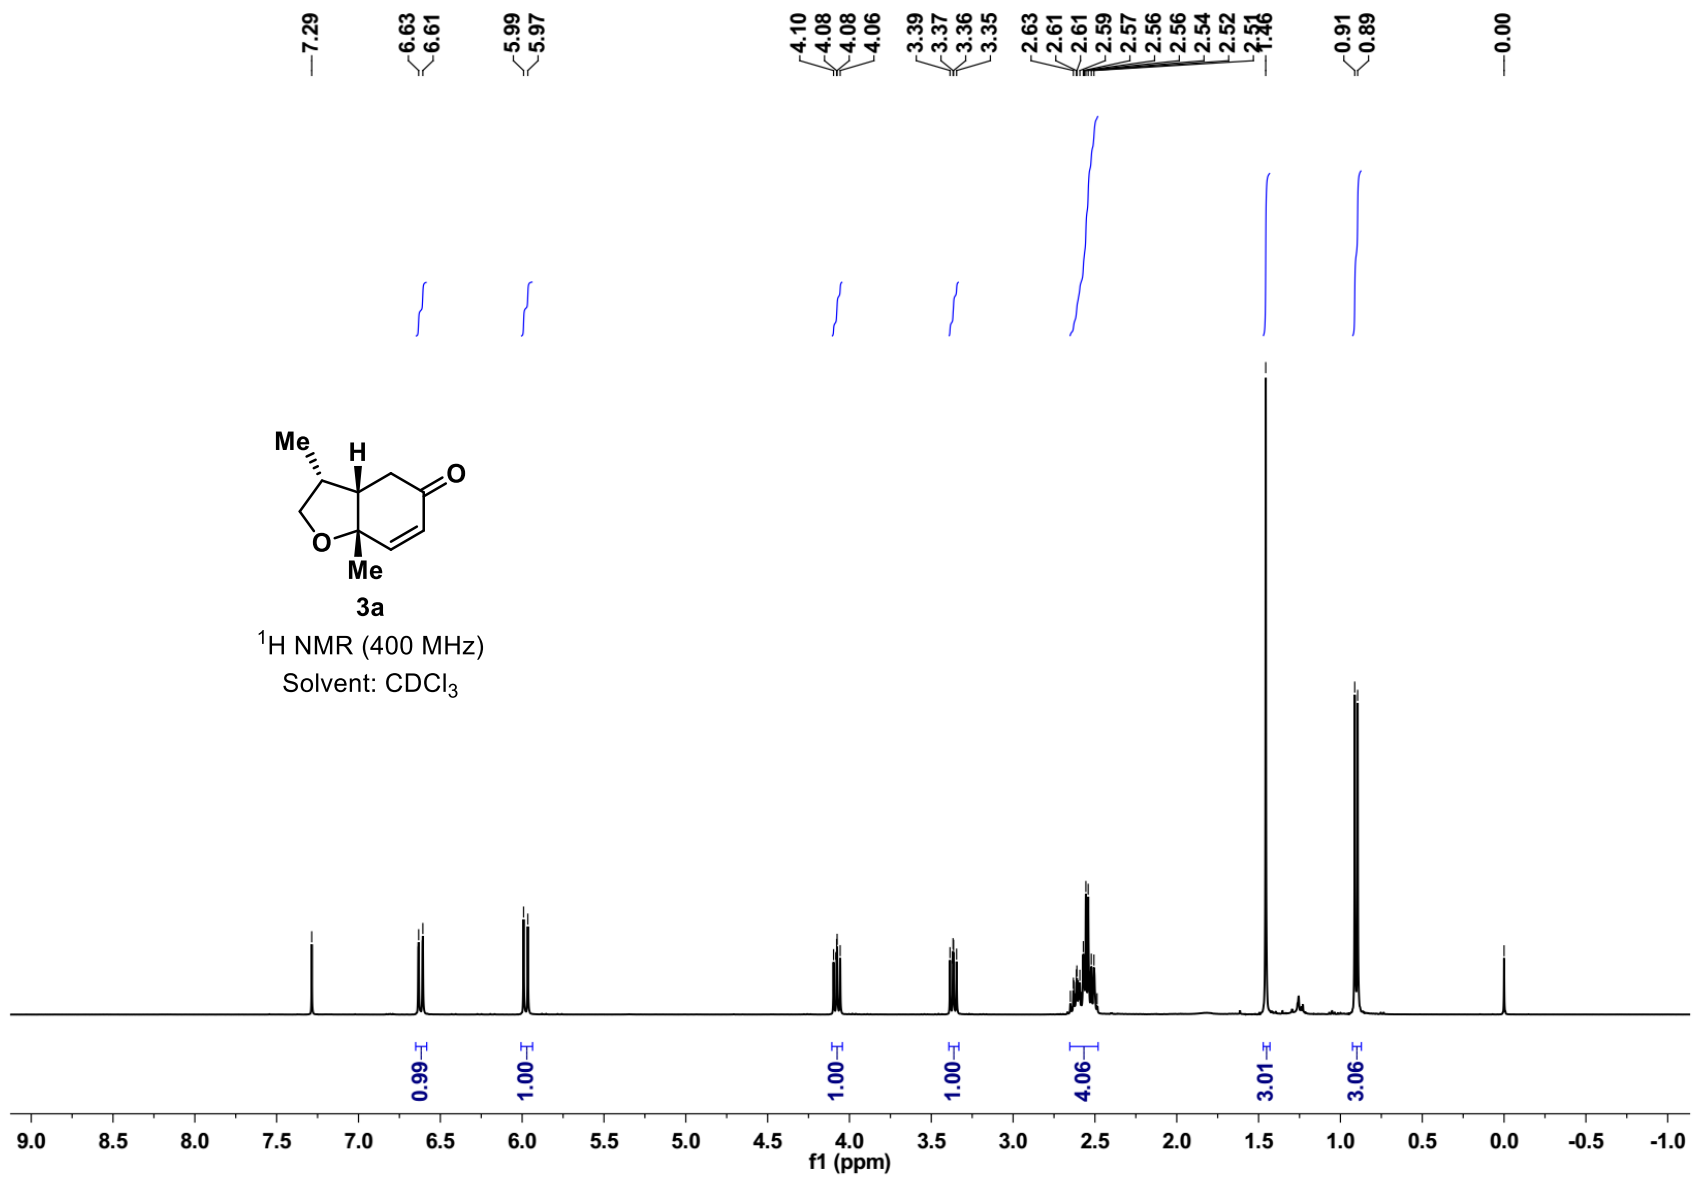

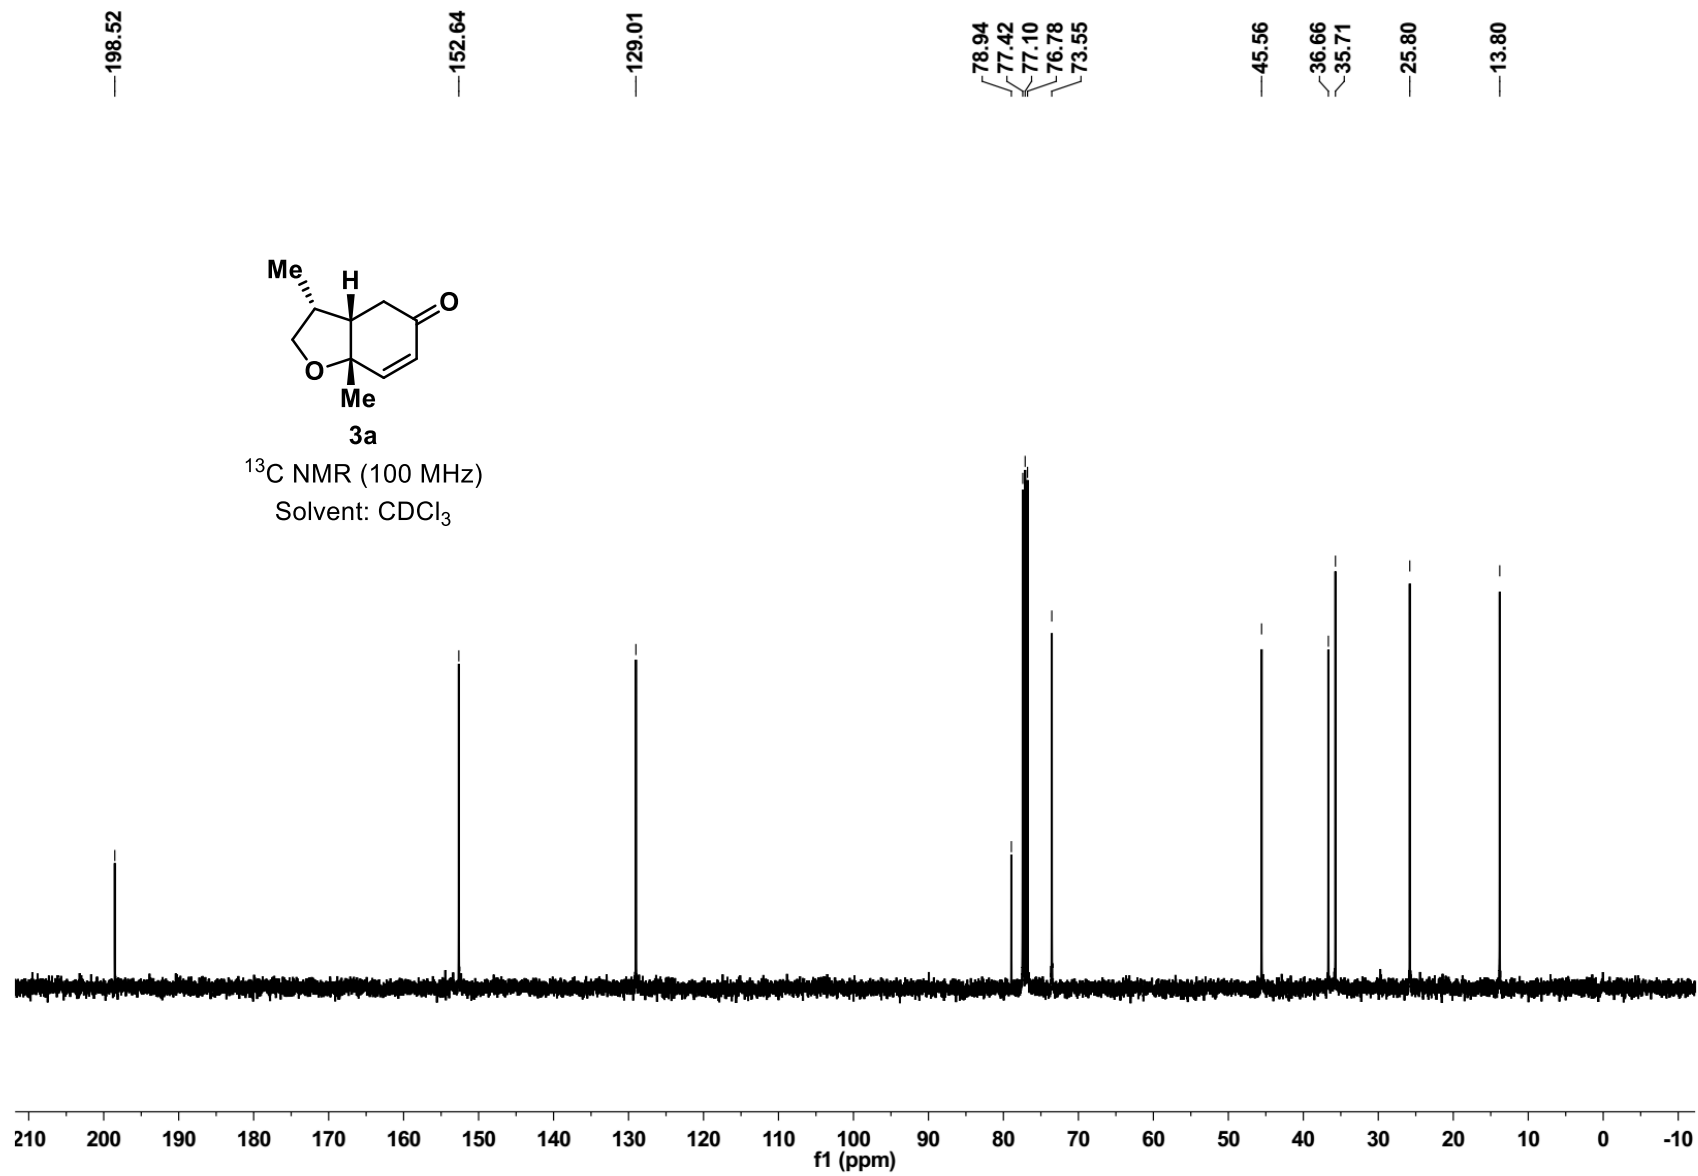

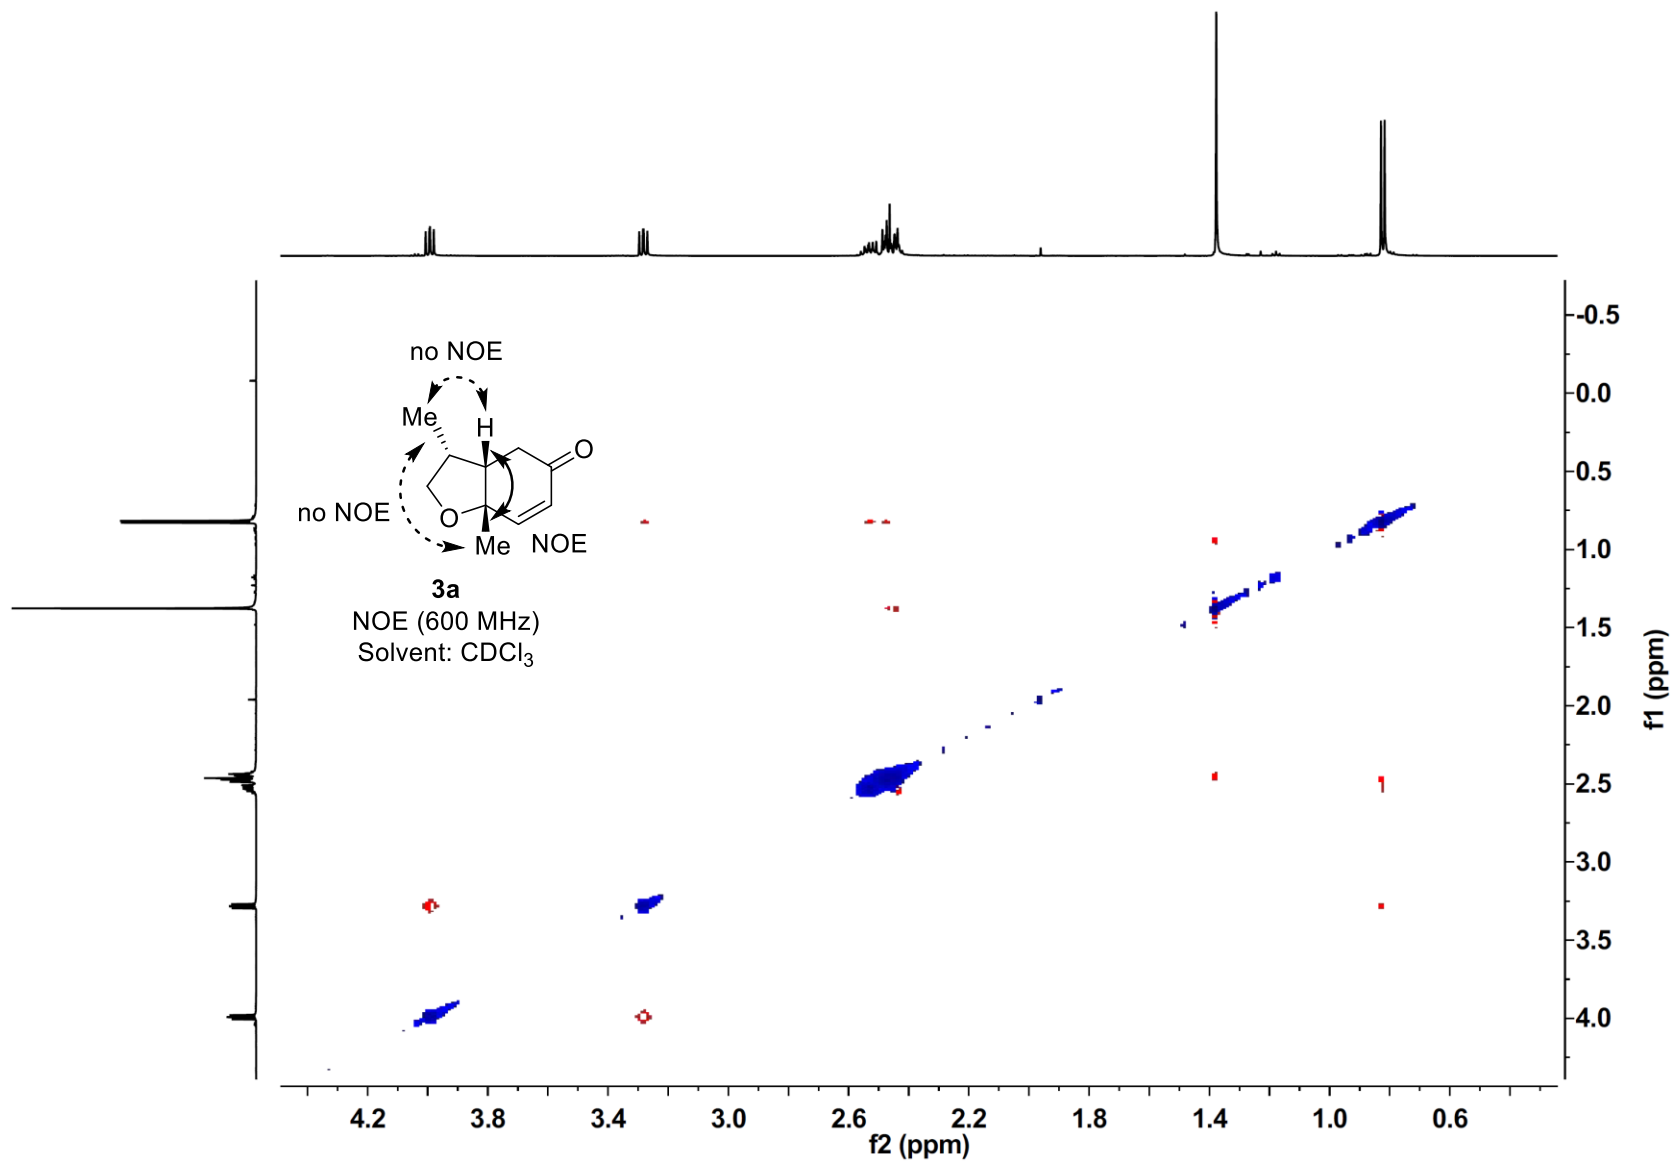



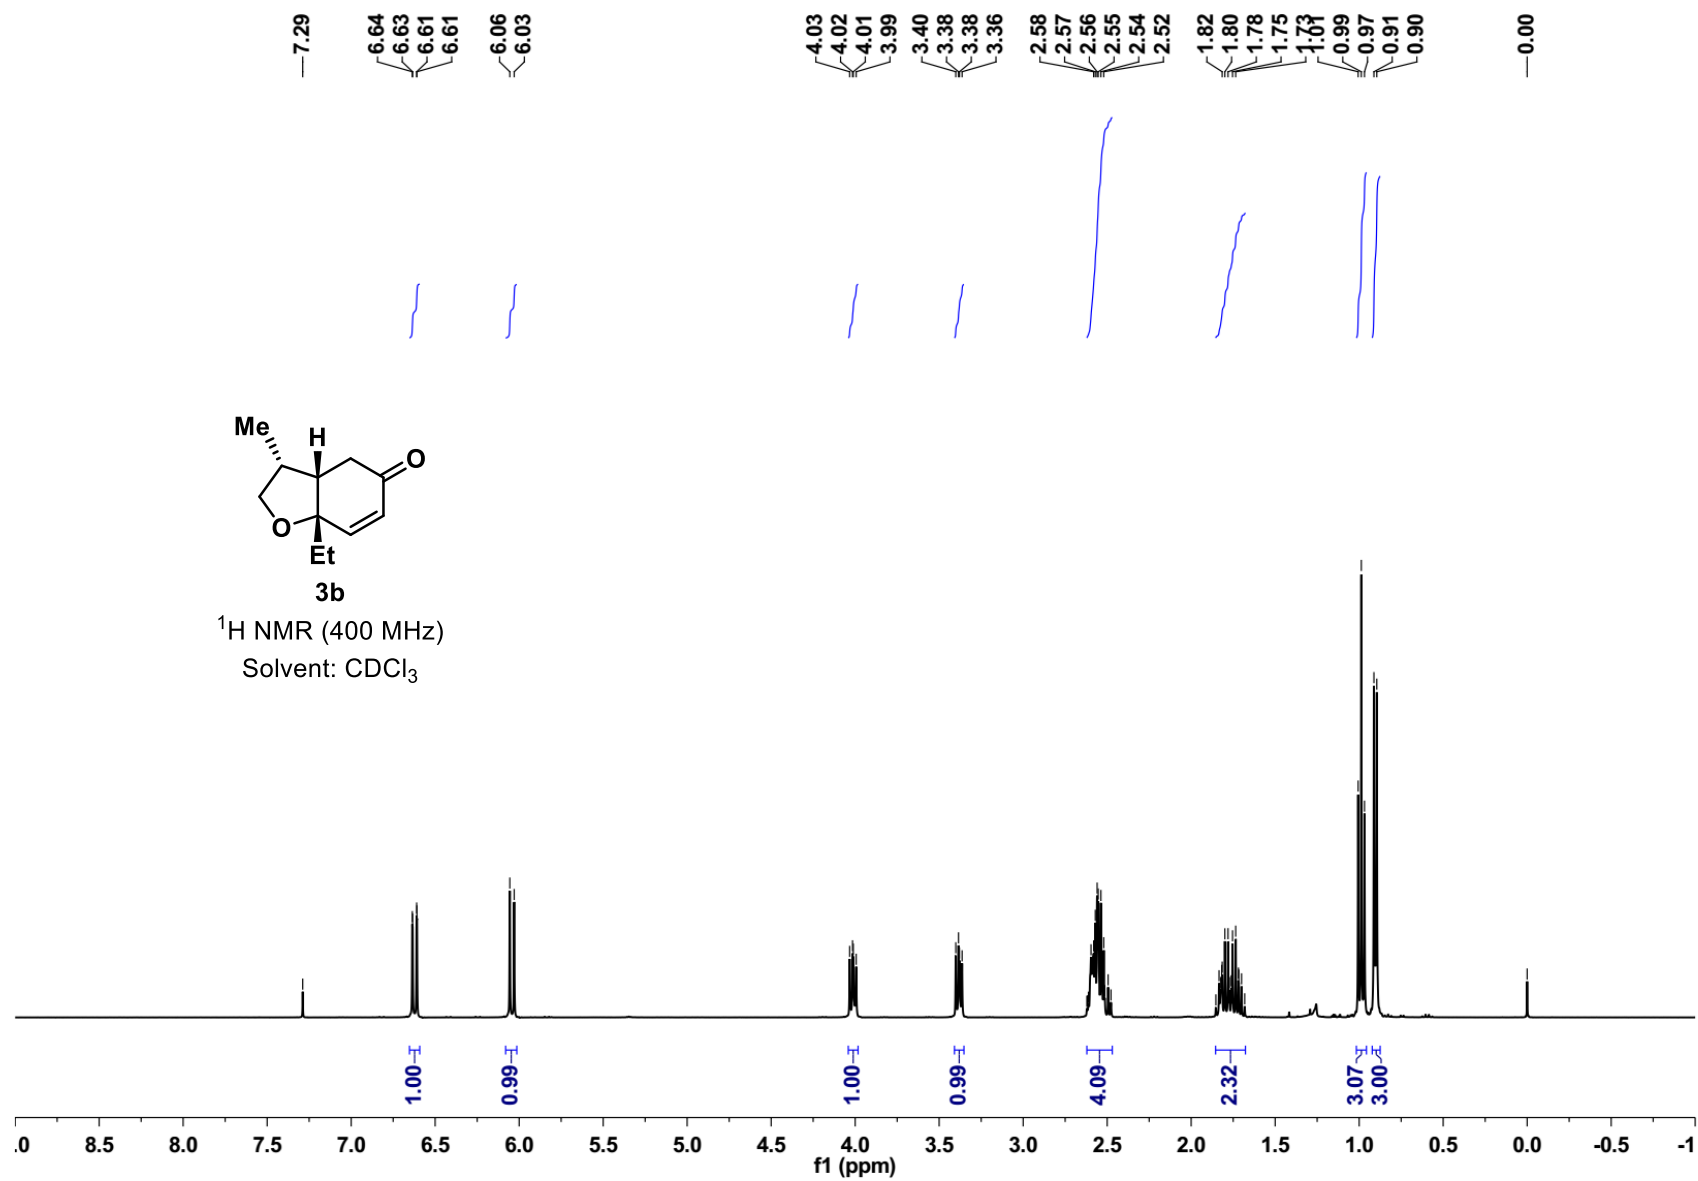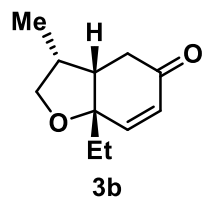

<sup>1</sup>H NMR (400 MHz)  
Solvent: CDCl<sub>3</sub>

—198.76

—151.79

—129.72

81.38  
77.42  
77.10  
76.78  
73.28

43.03  
37.22  
36.13  
32.25

—13.80  
—8.38

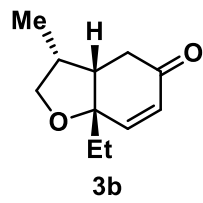

<sup>13</sup>C NMR (100 MHz)  
Solvent: CDCl<sub>3</sub>

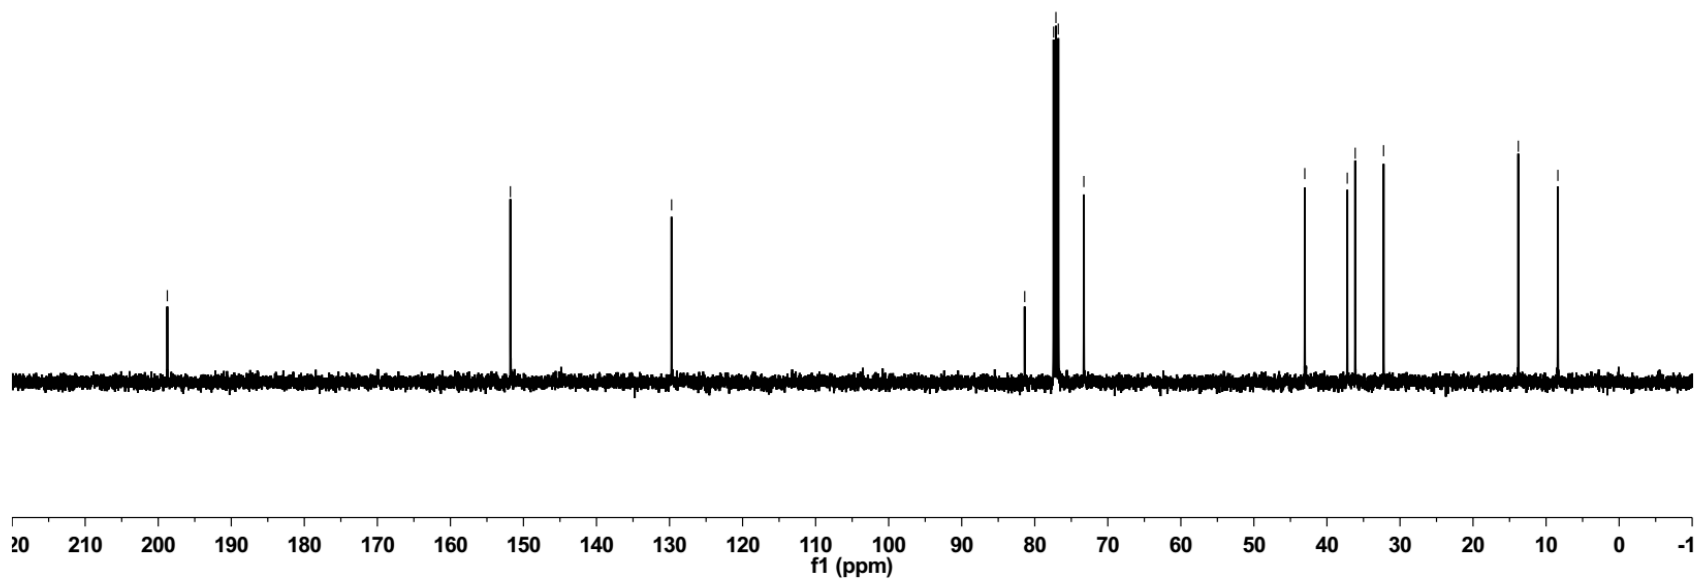

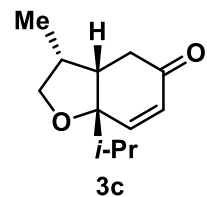

<sup>1</sup>H NMR (400 MHz)  
Solvent: CDCl<sub>3</sub>

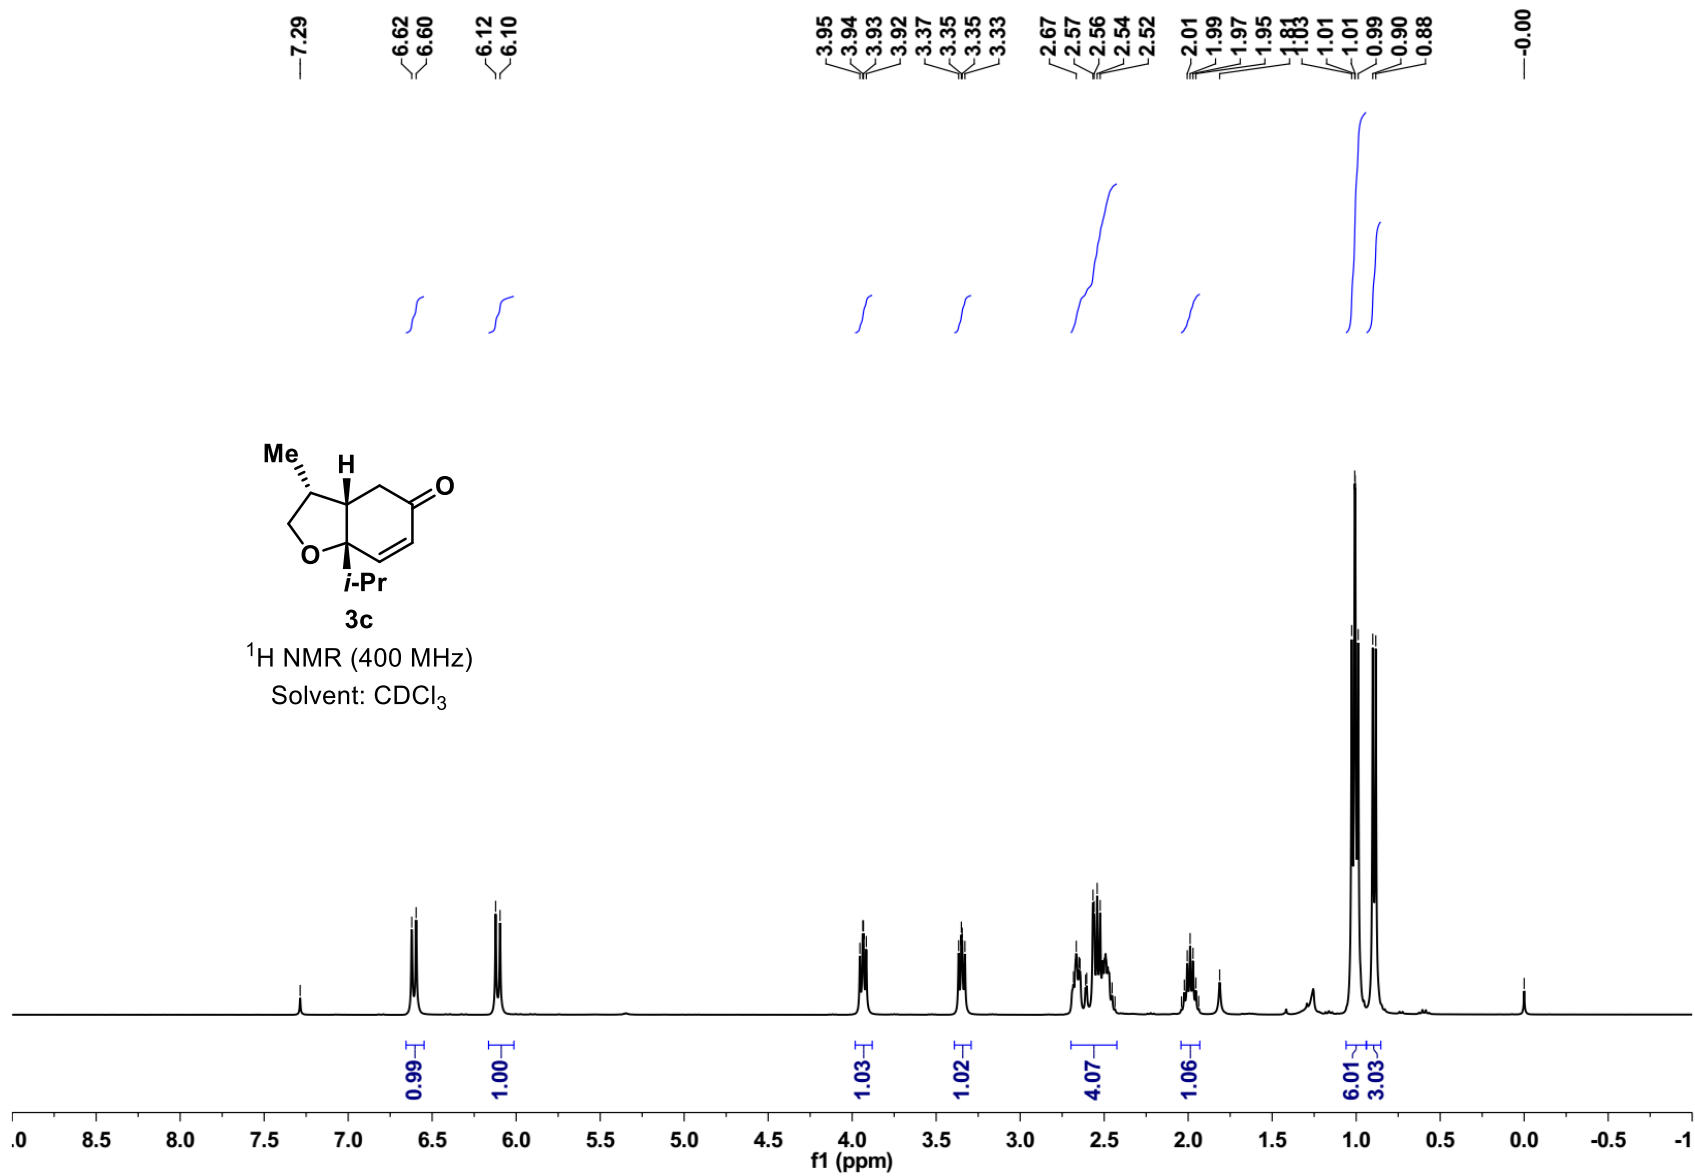

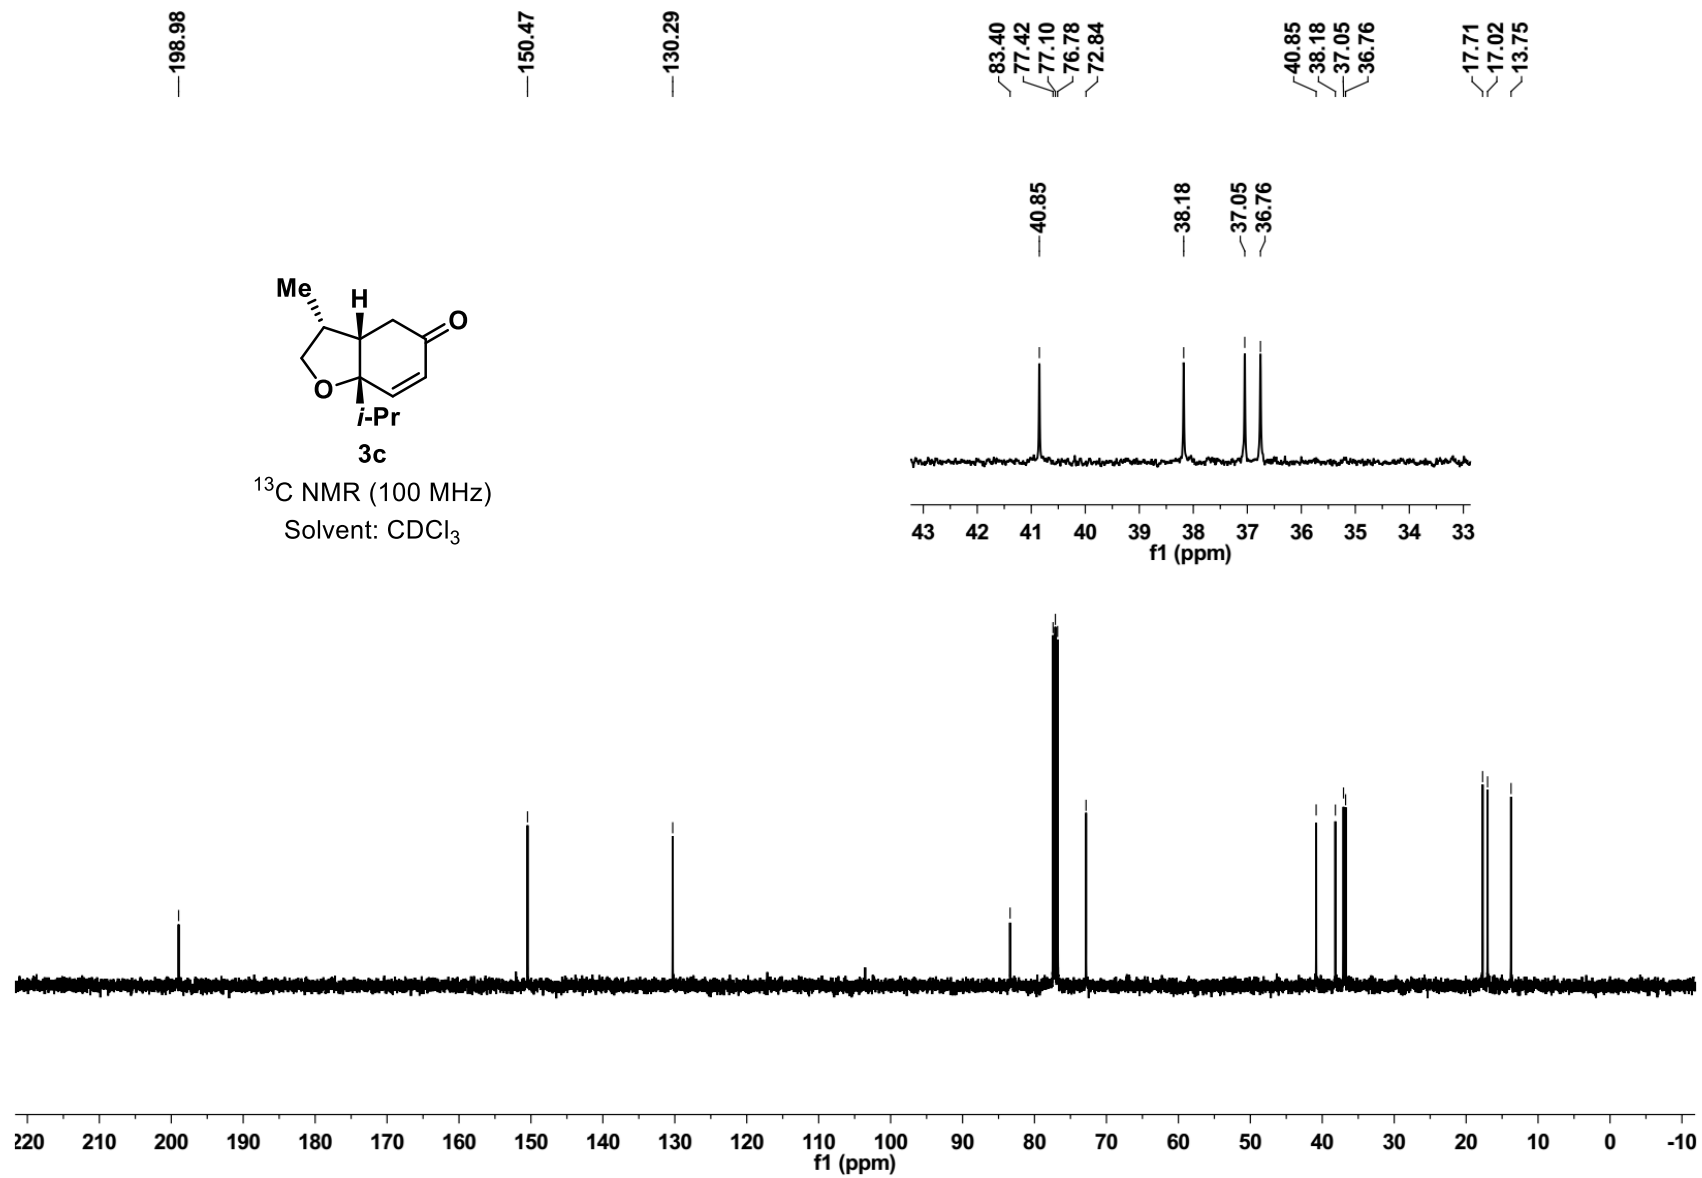

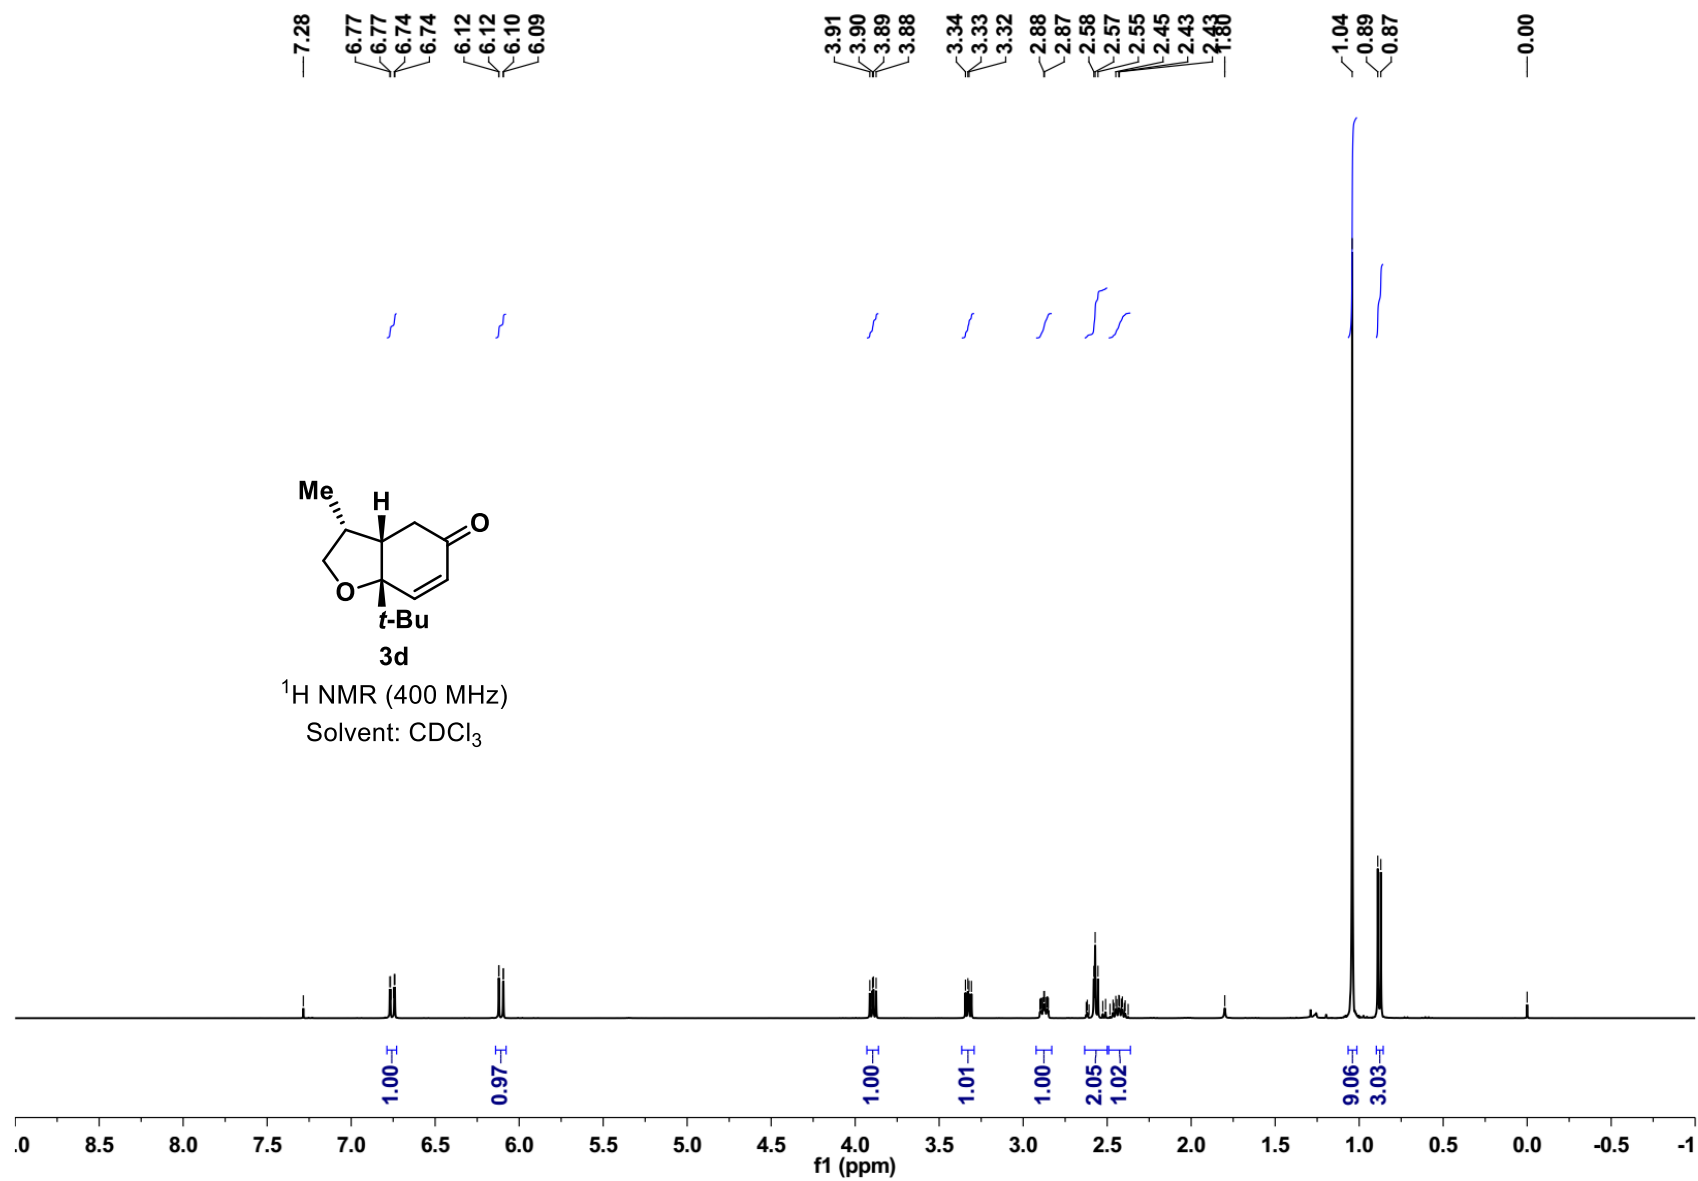

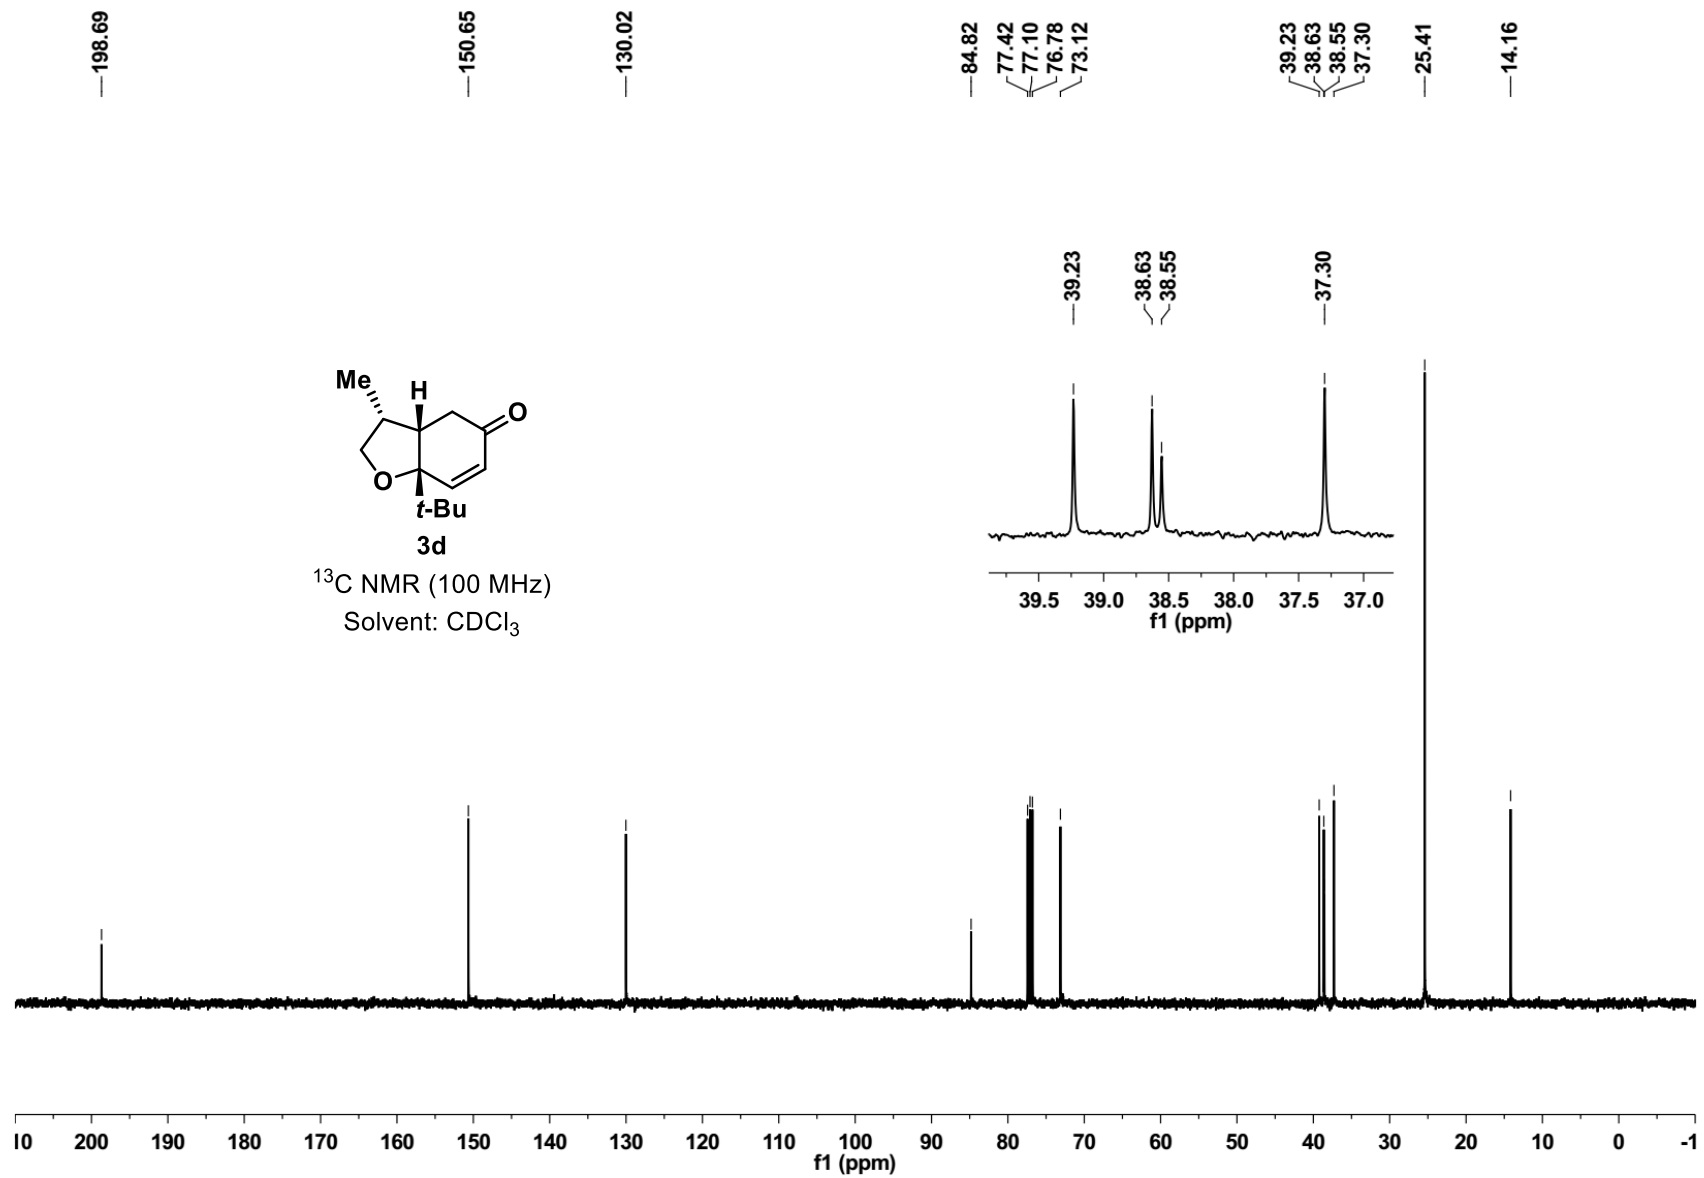

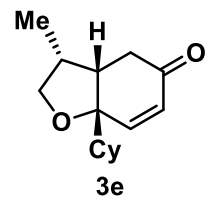

<sup>1</sup>H NMR (400 MHz)  
Solvent: CDCl<sub>3</sub>

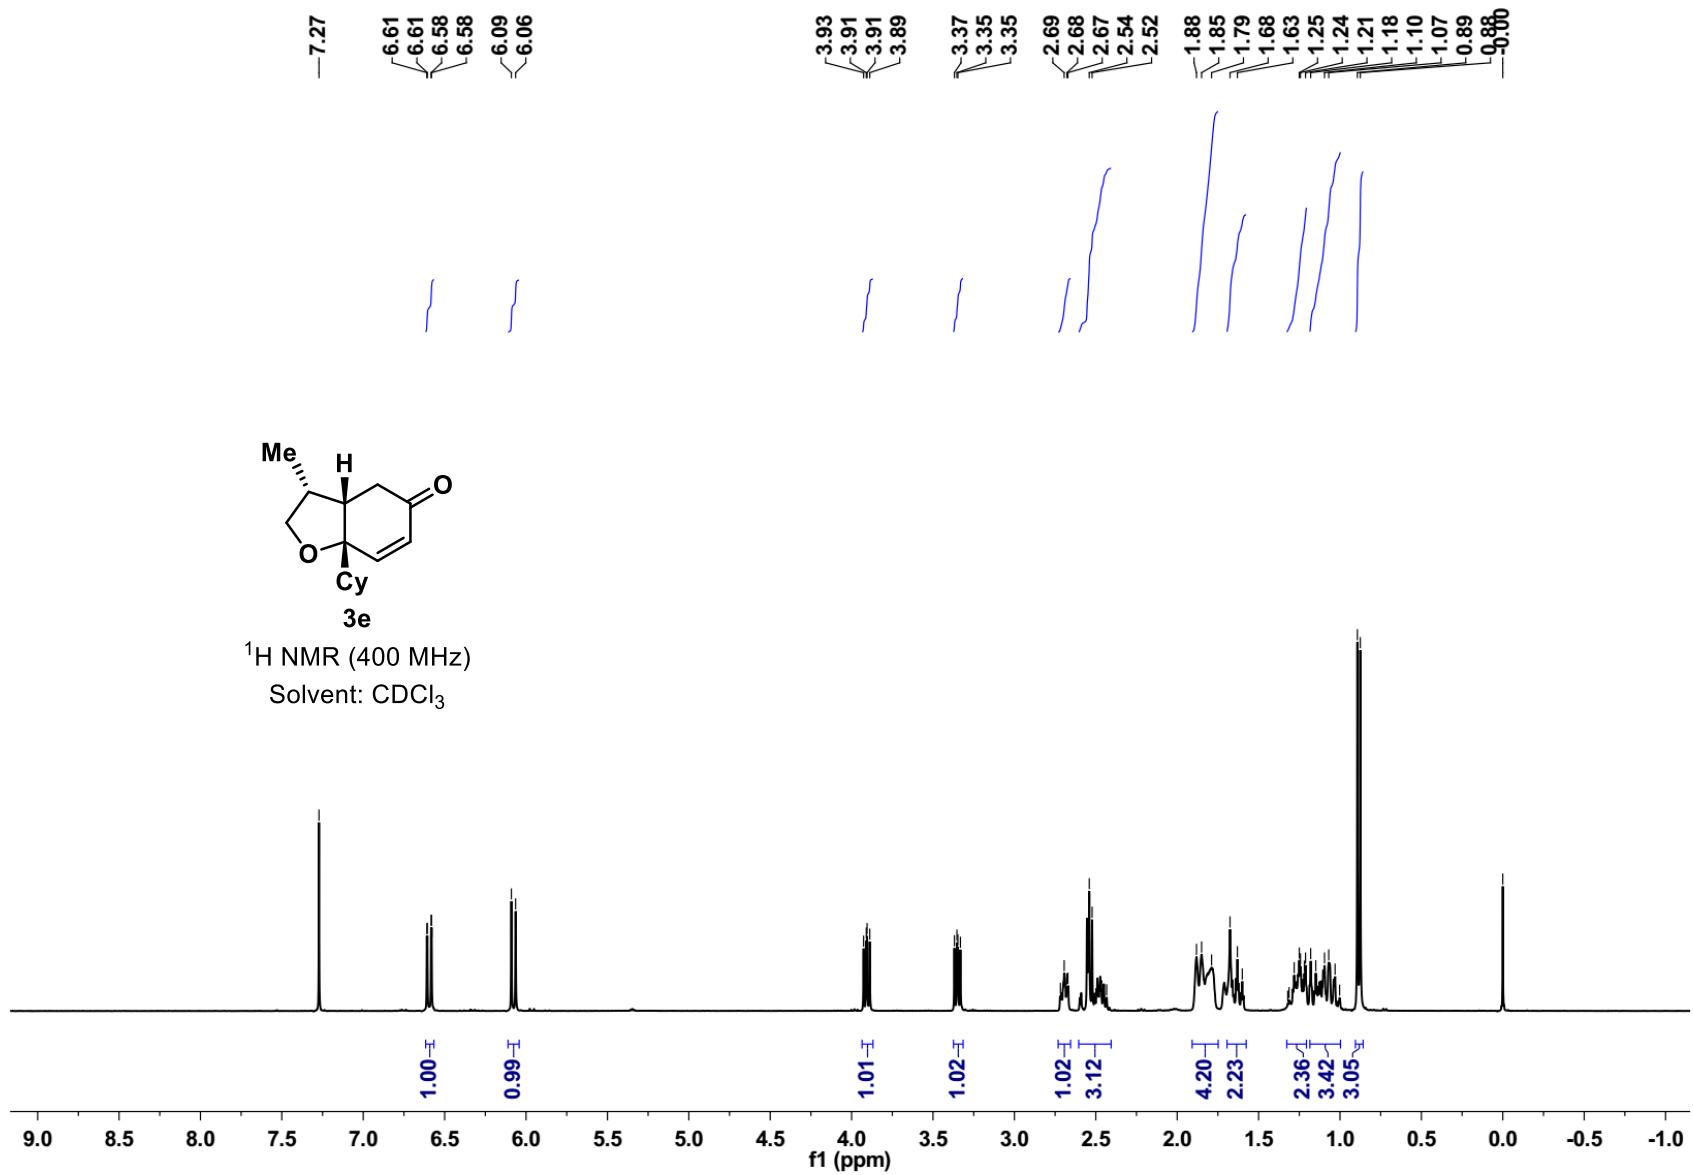

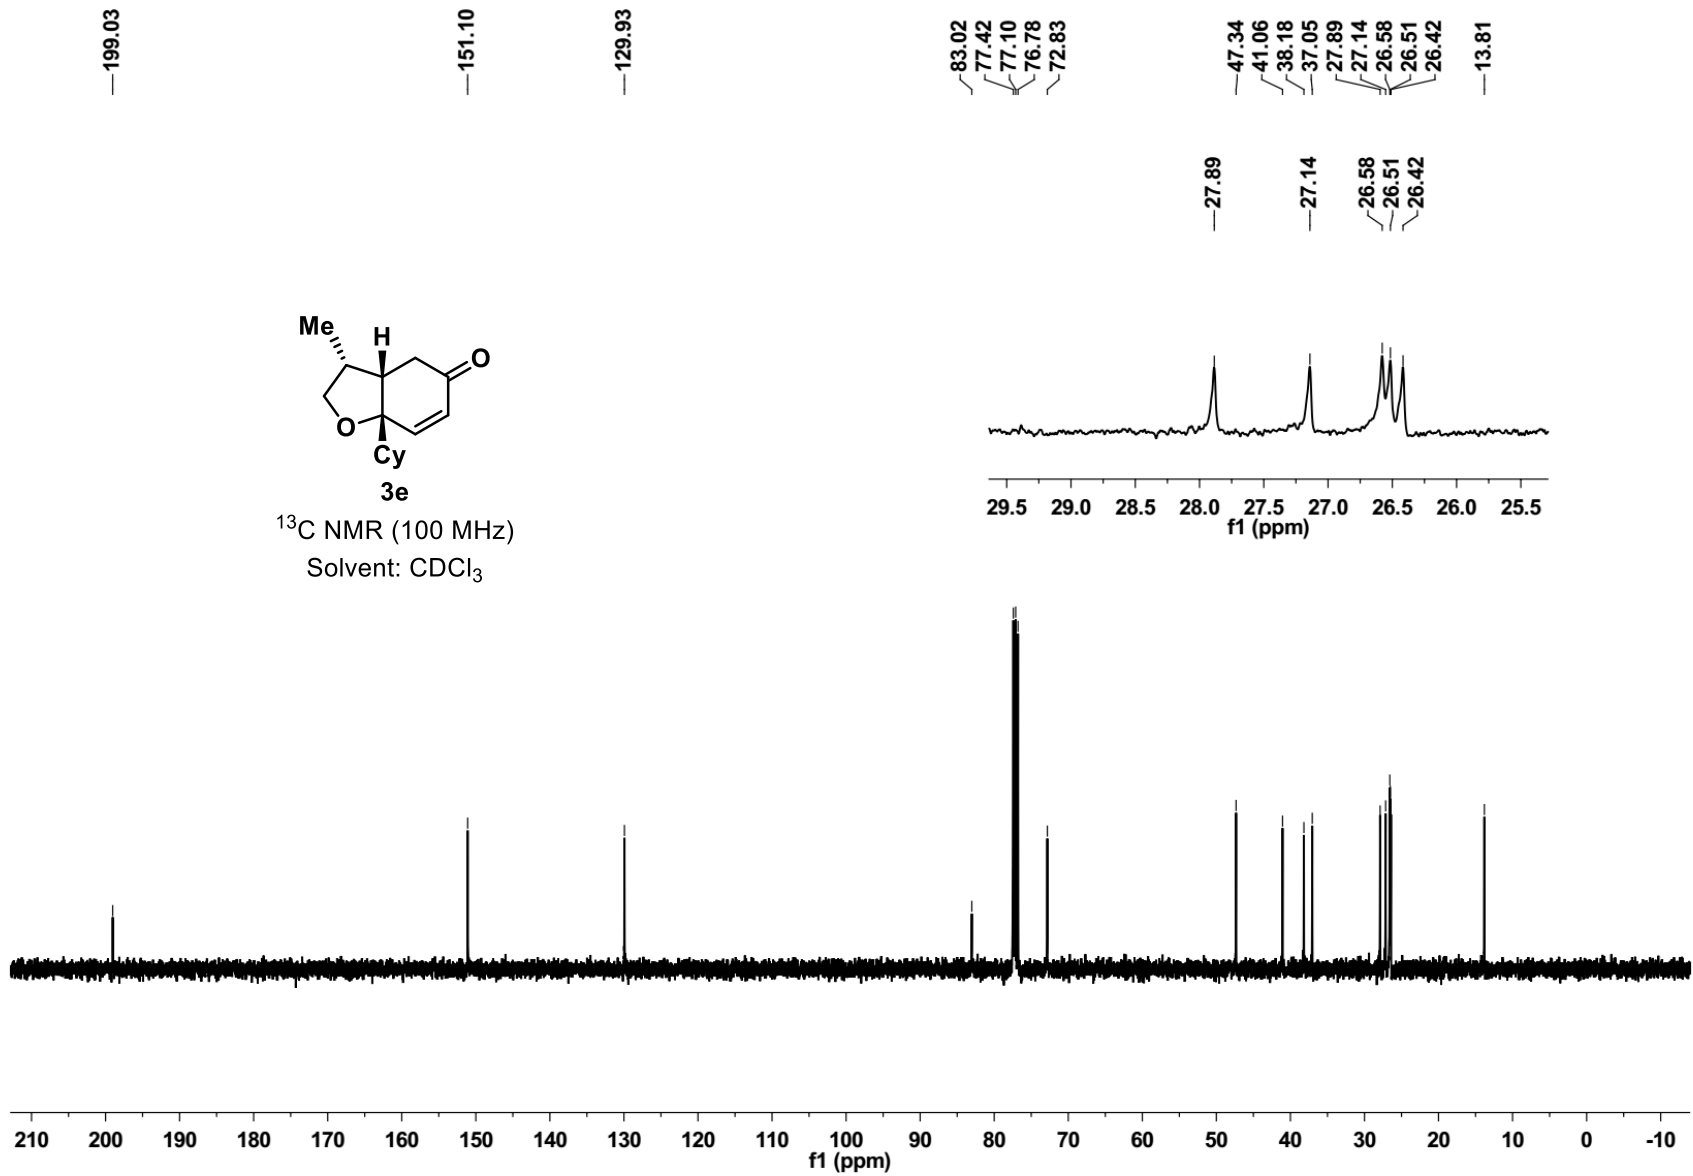



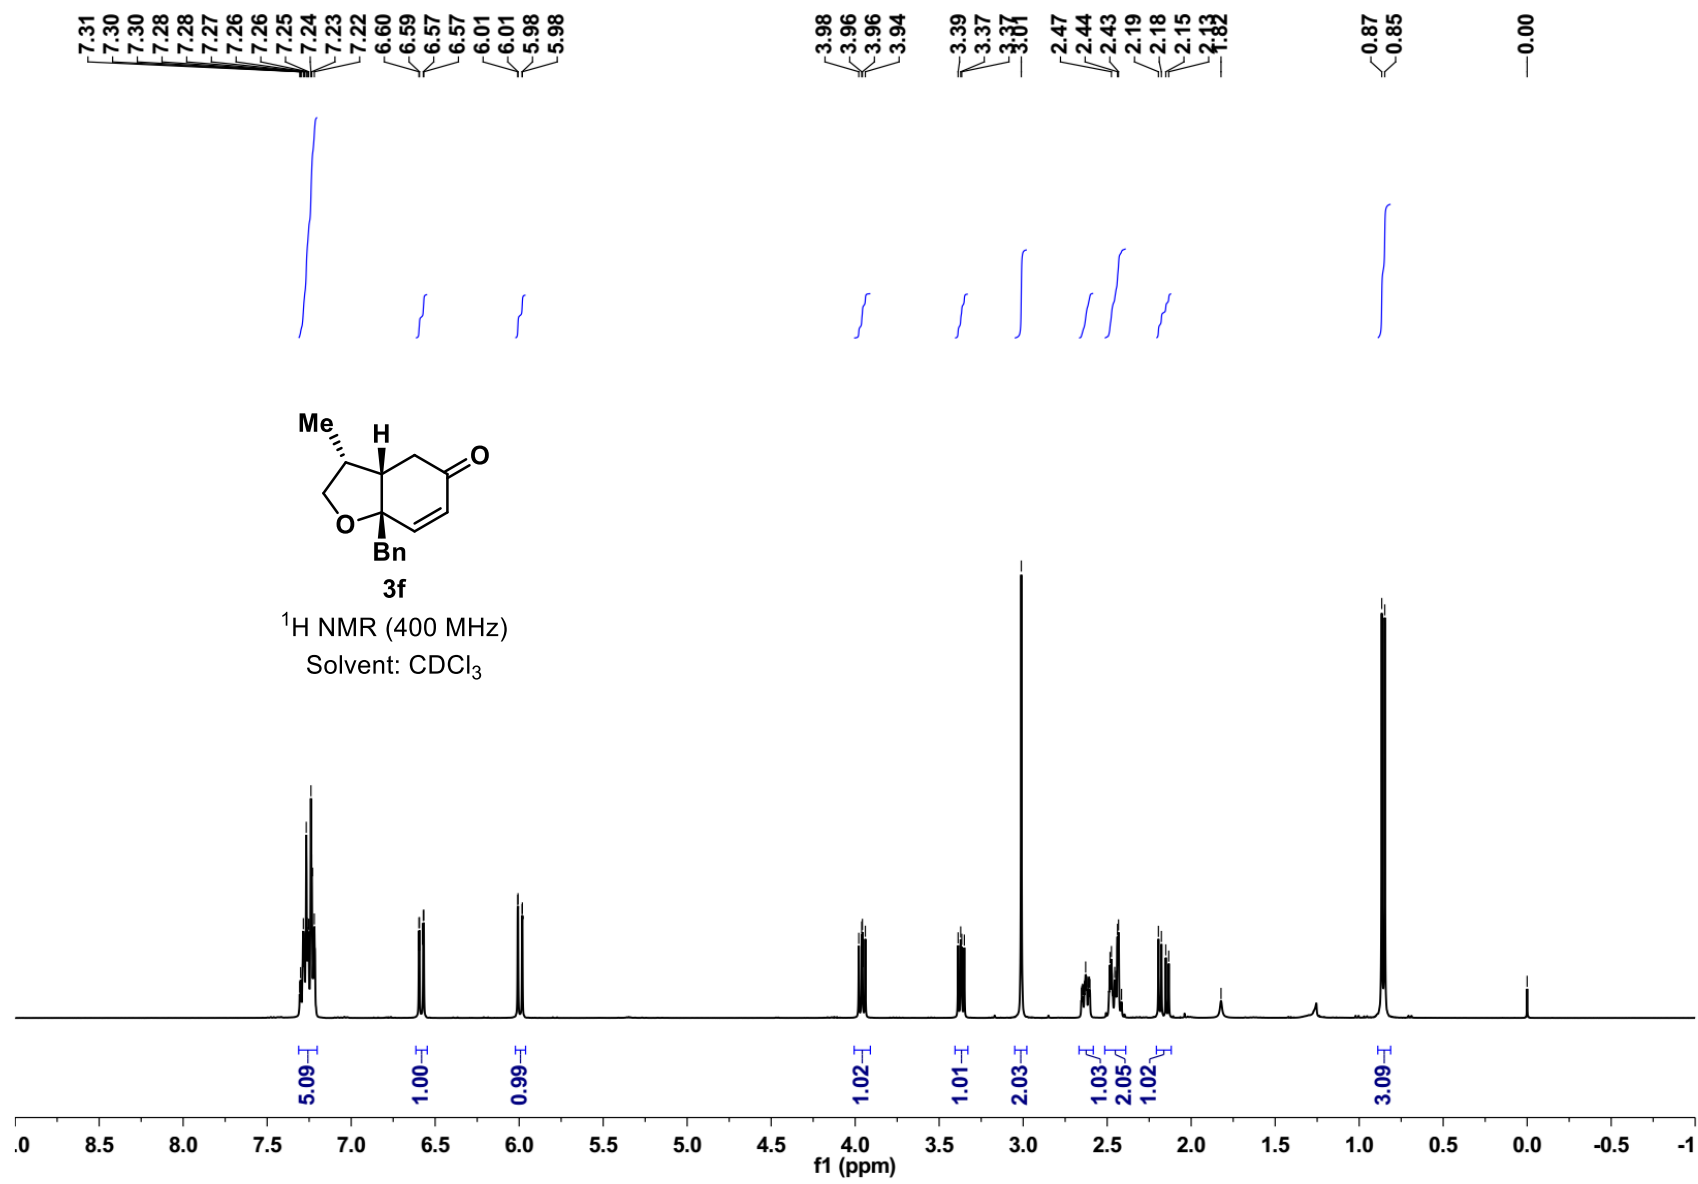

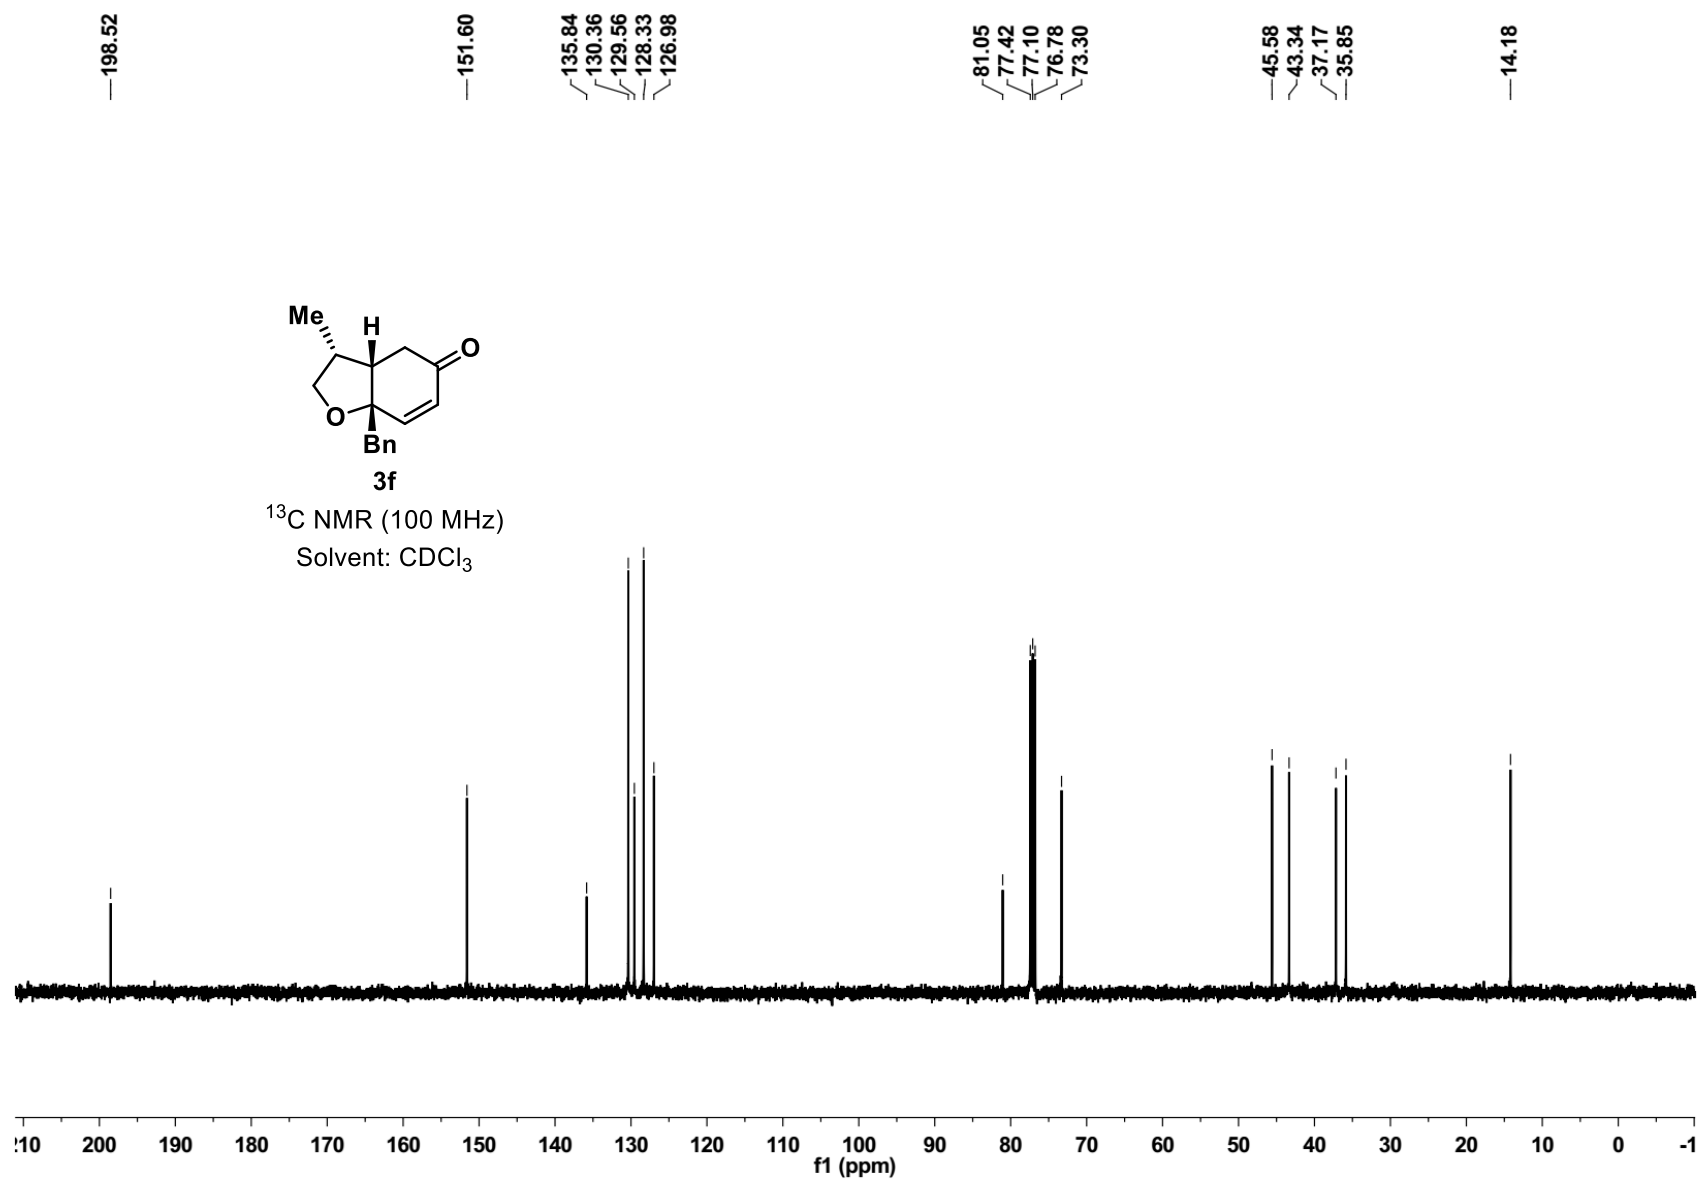

7.28  
6.57  
6.54  
6.11  
6.08  
5.94  
5.92  
5.90  
5.33  
5.29  
5.28  
5.25  
5.23  
5.23  
4.15  
4.13  
4.13  
4.11  
3.53  
3.52  
3.51  
3.49  
2.65  
2.63  
2.61  
2.60  
2.59  
2.57  
2.54  
2.53  
1.80  
0.94  
0.92  
-0.00

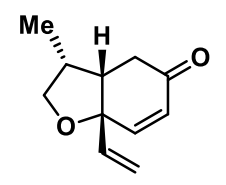

**3g**

<sup>1</sup>H NMR (400 MHz)  
Solvent: CDCl<sub>3</sub>

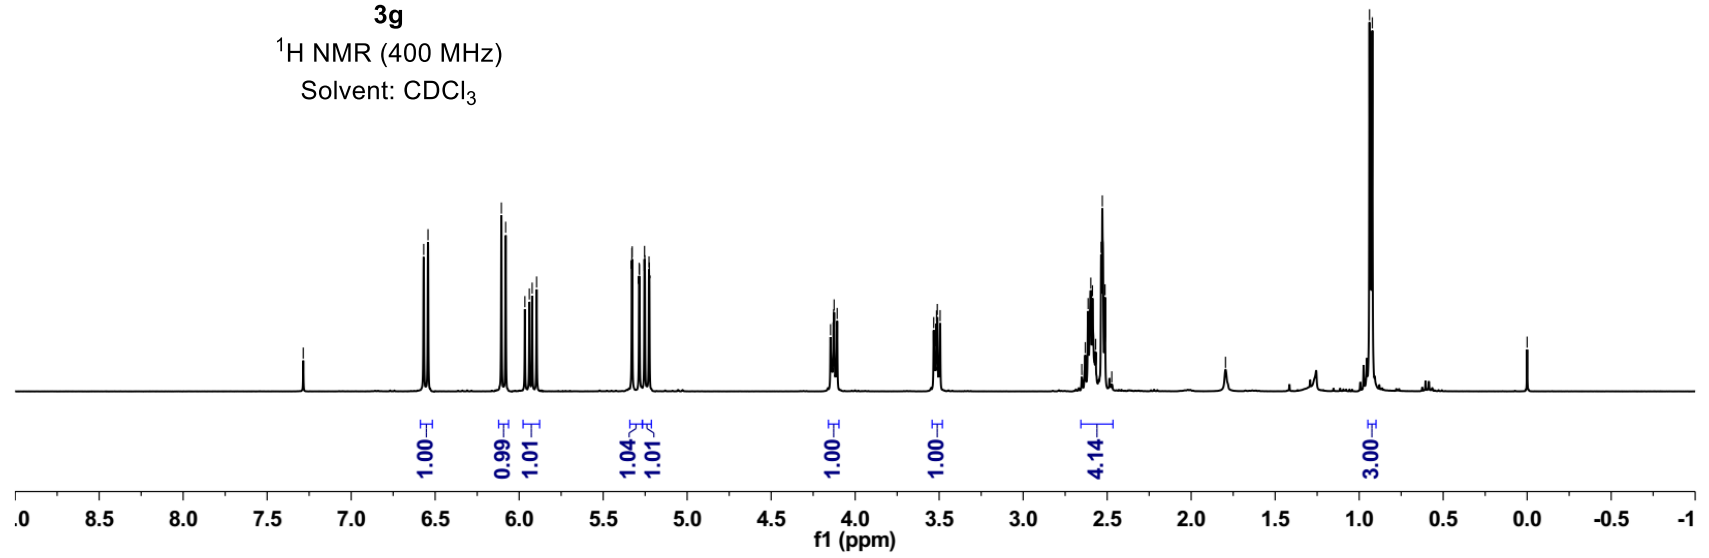

—198.62

—149.22

—139.72

—130.06

—115.40

81.40

77.42

77.10

76.78

74.01

—45.27

—36.23

—35.02

—13.59

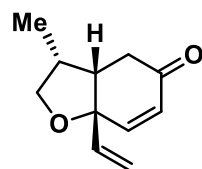

**3g**

<sup>13</sup>C NMR (100 MHz)

Solvent: CDCl<sub>3</sub>

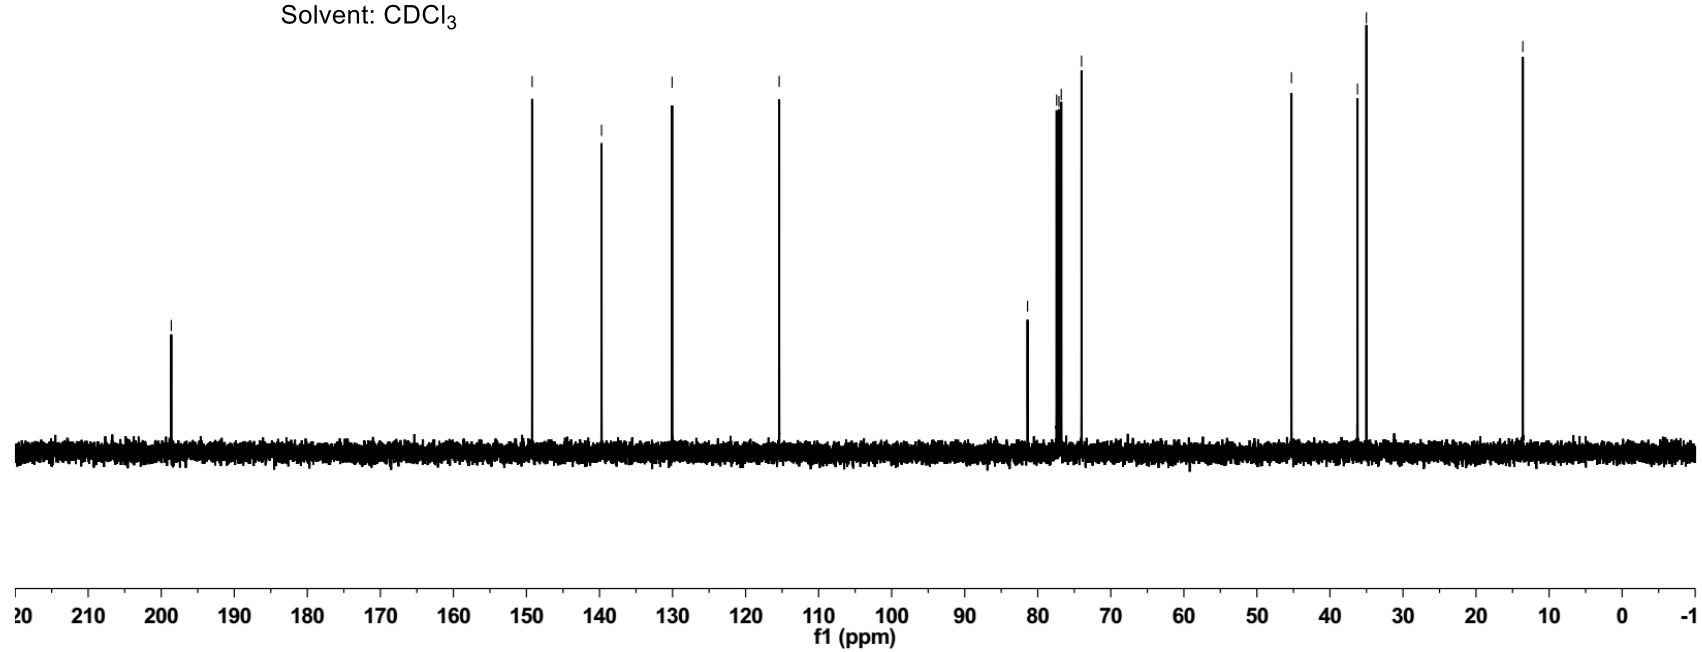

7.29  
 6.66  
 6.63  
 6.05  
 6.02  
 5.86  
 5.84  
 5.82  
 5.81  
 5.79  
 5.07  
 5.03  
 5.03  
 5.00  
 4.97  
 4.05  
 4.03  
 4.02  
 4.01  
 3.40  
 3.38  
 3.38  
 3.36  
 2.61  
 2.61  
 2.59  
 2.57  
 2.56  
 2.54  
 2.20  
 2.18  
 1.87  
 1.86  
 1.85  
 1.80  
 1.80  
 0.89  
 0.89  
 -0.00

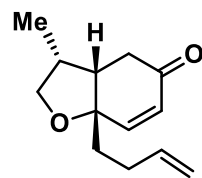

3h

<sup>1</sup>H NMR (400 MHz)

Solvent: CDCl<sub>3</sub>

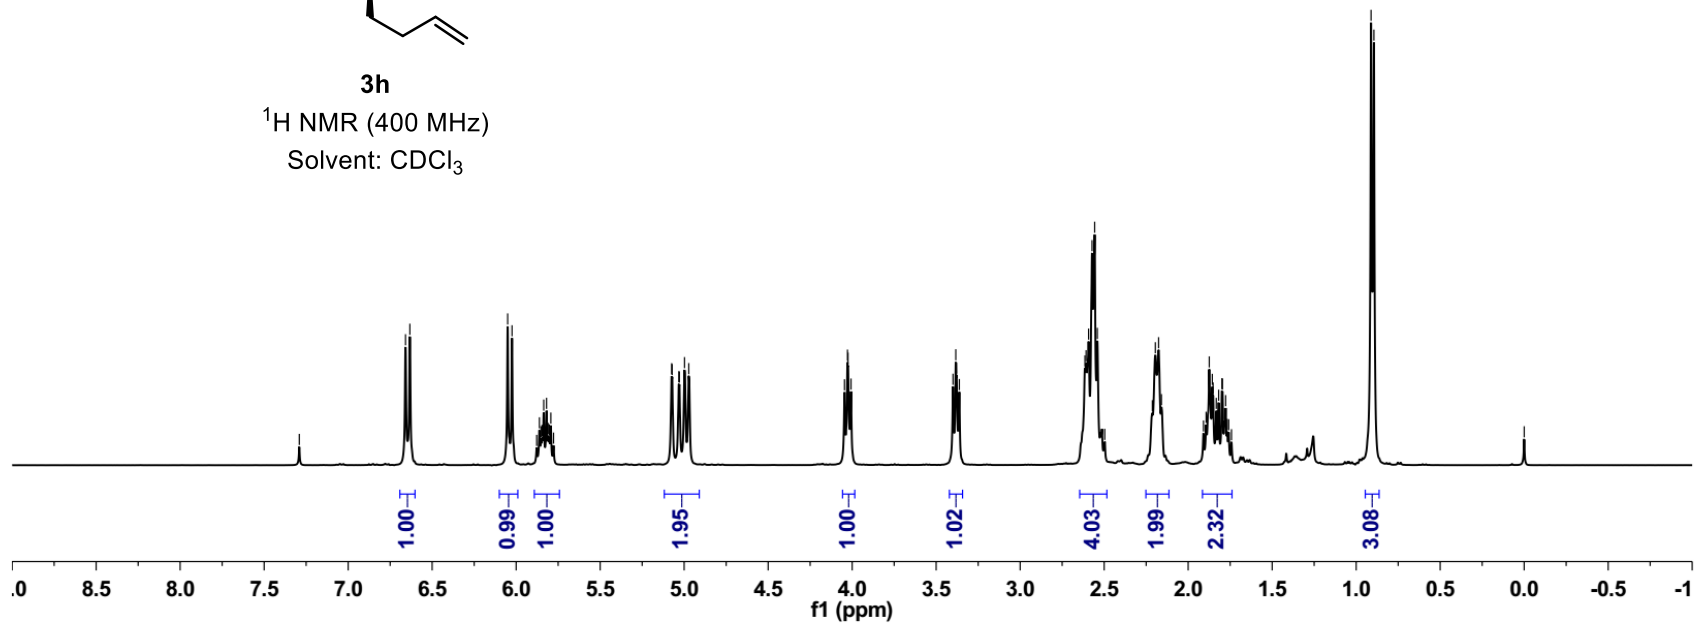

—198.55

—151.61

—137.86

—129.62

—115.01

80.79  
77.42  
77.10  
76.78  
73.29

43.57  
38.57  
37.05  
35.94

—28.27

—13.86

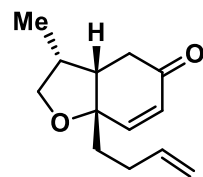

**3h**

<sup>13</sup>C NMR (100 MHz)

Solvent: CDCl<sub>3</sub>

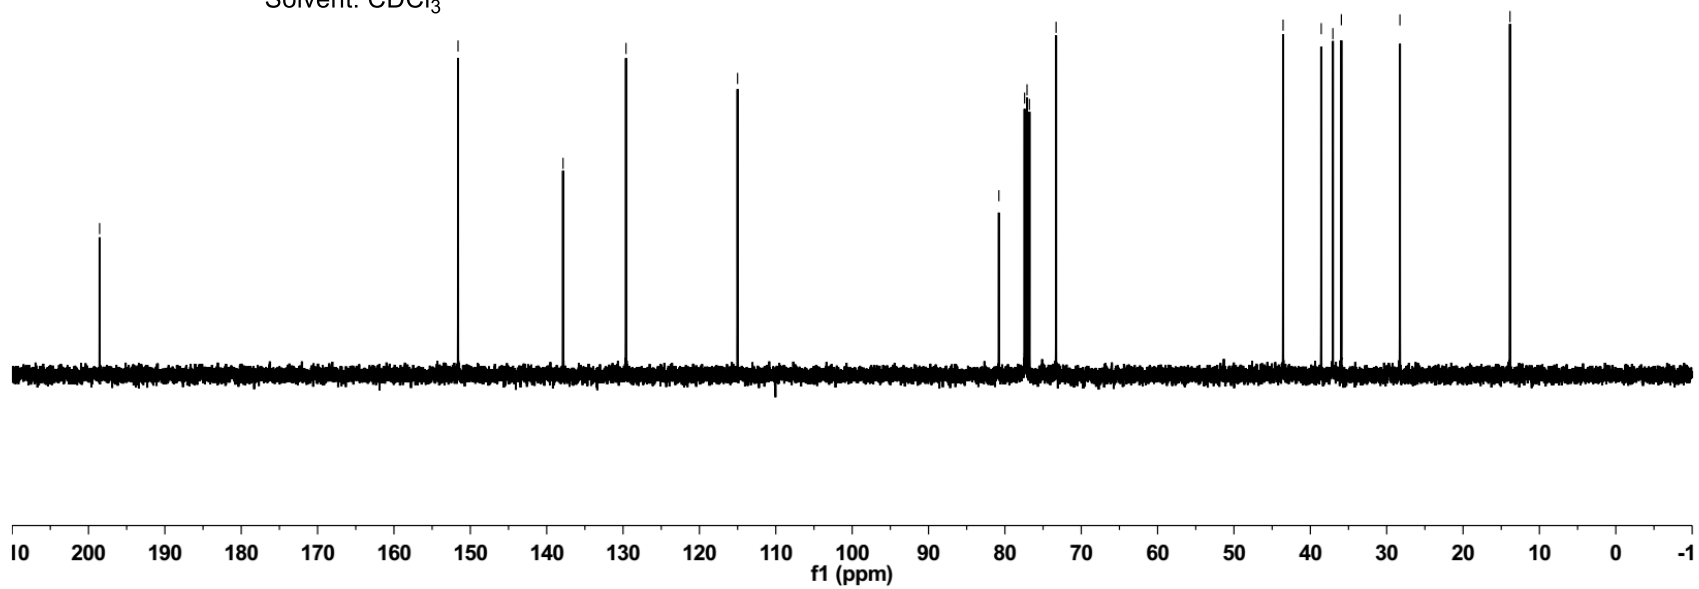

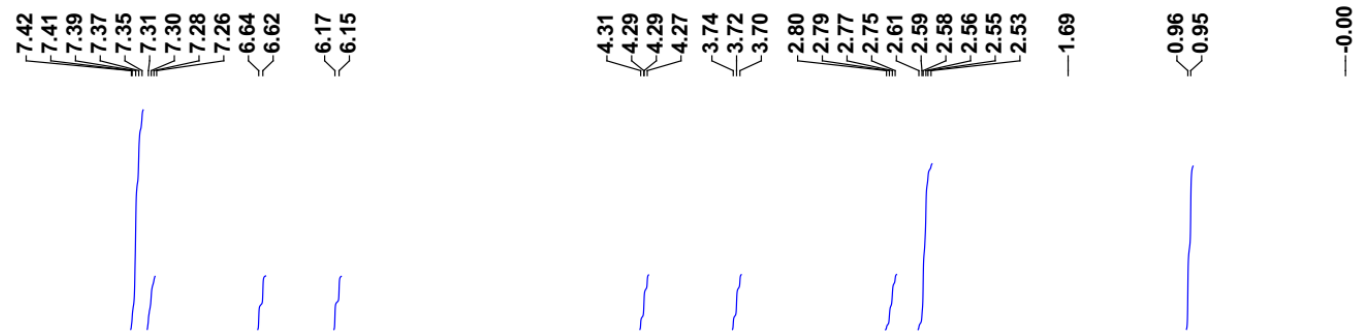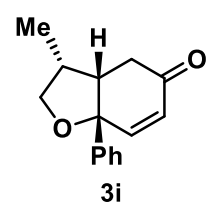

<sup>1</sup>H NMR (400 MHz)  
Solvent: CDCl<sub>3</sub>

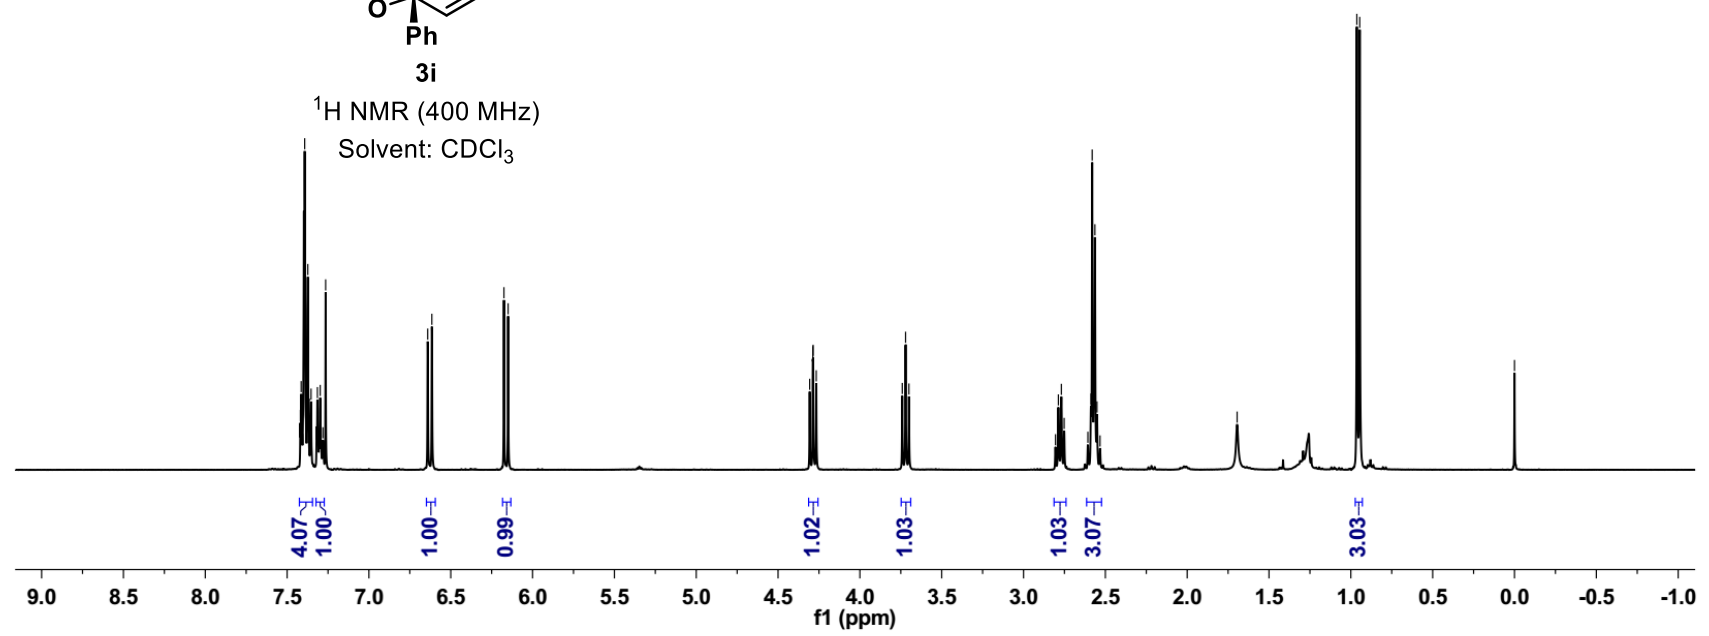

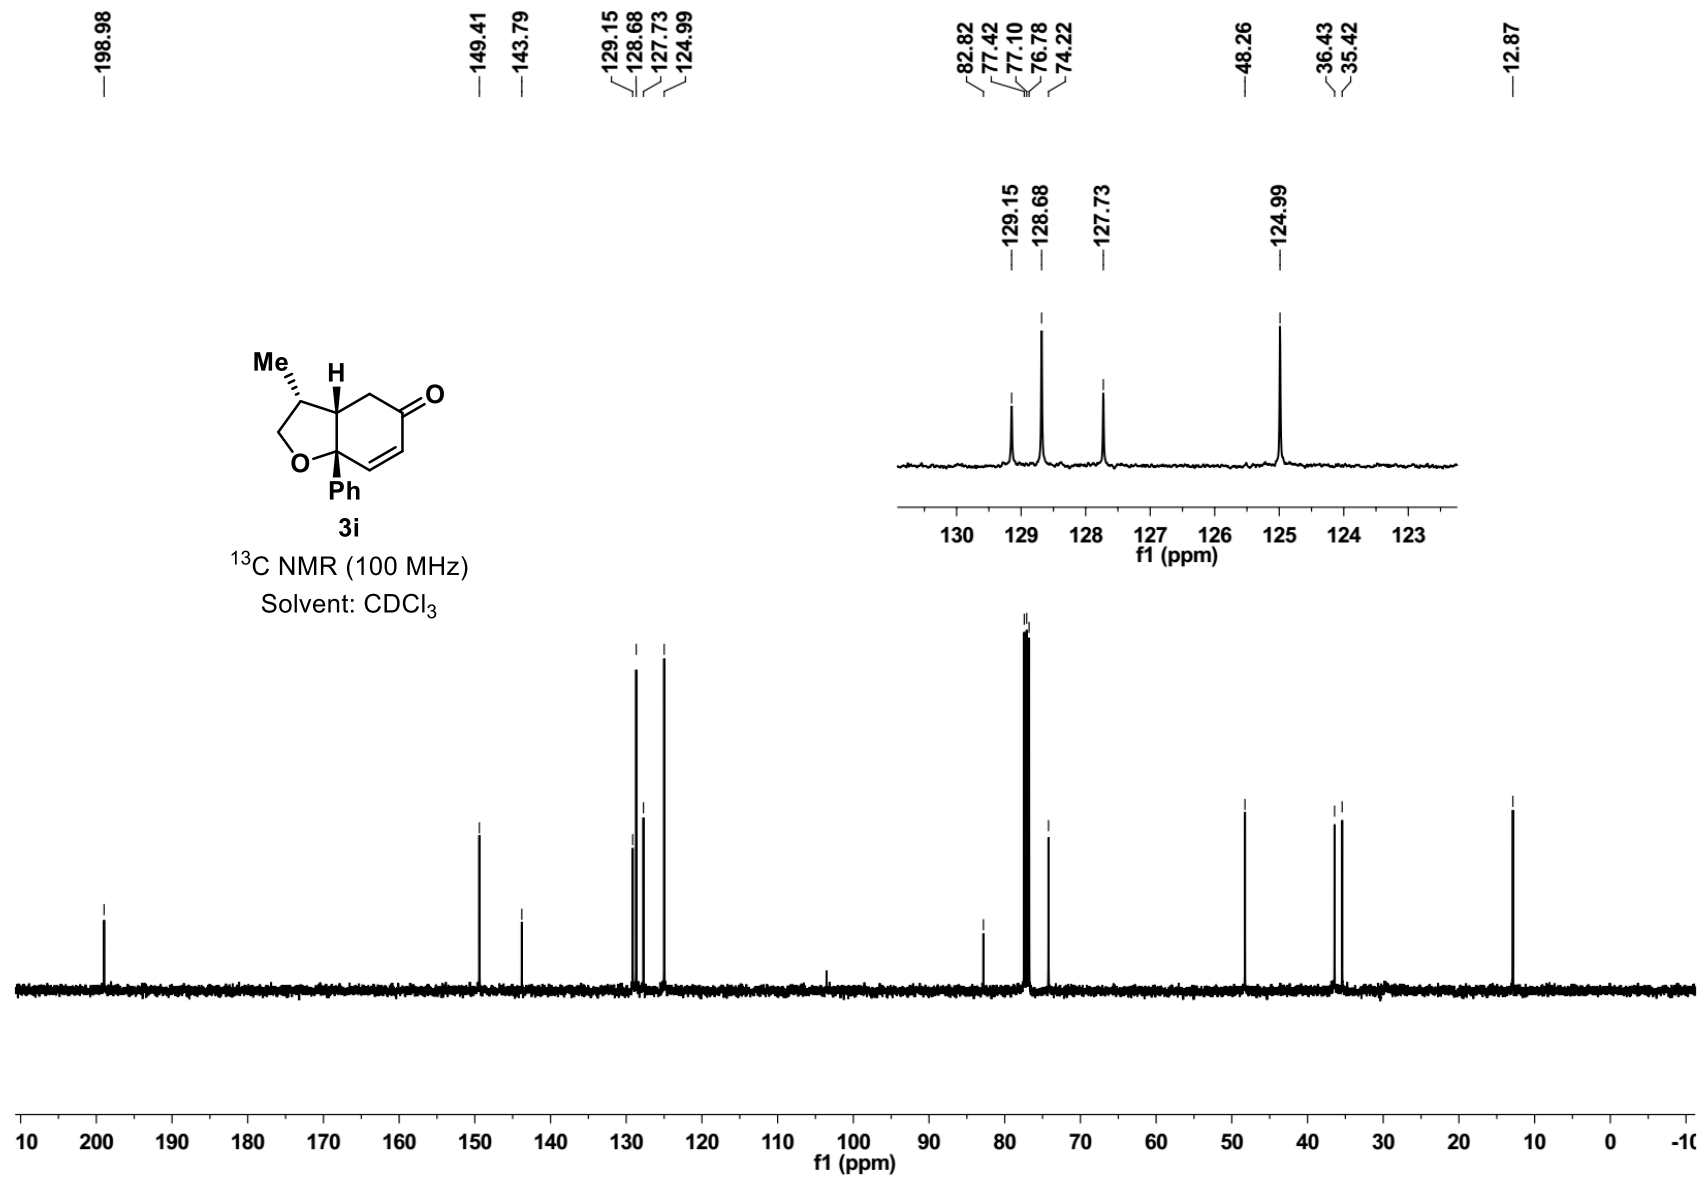



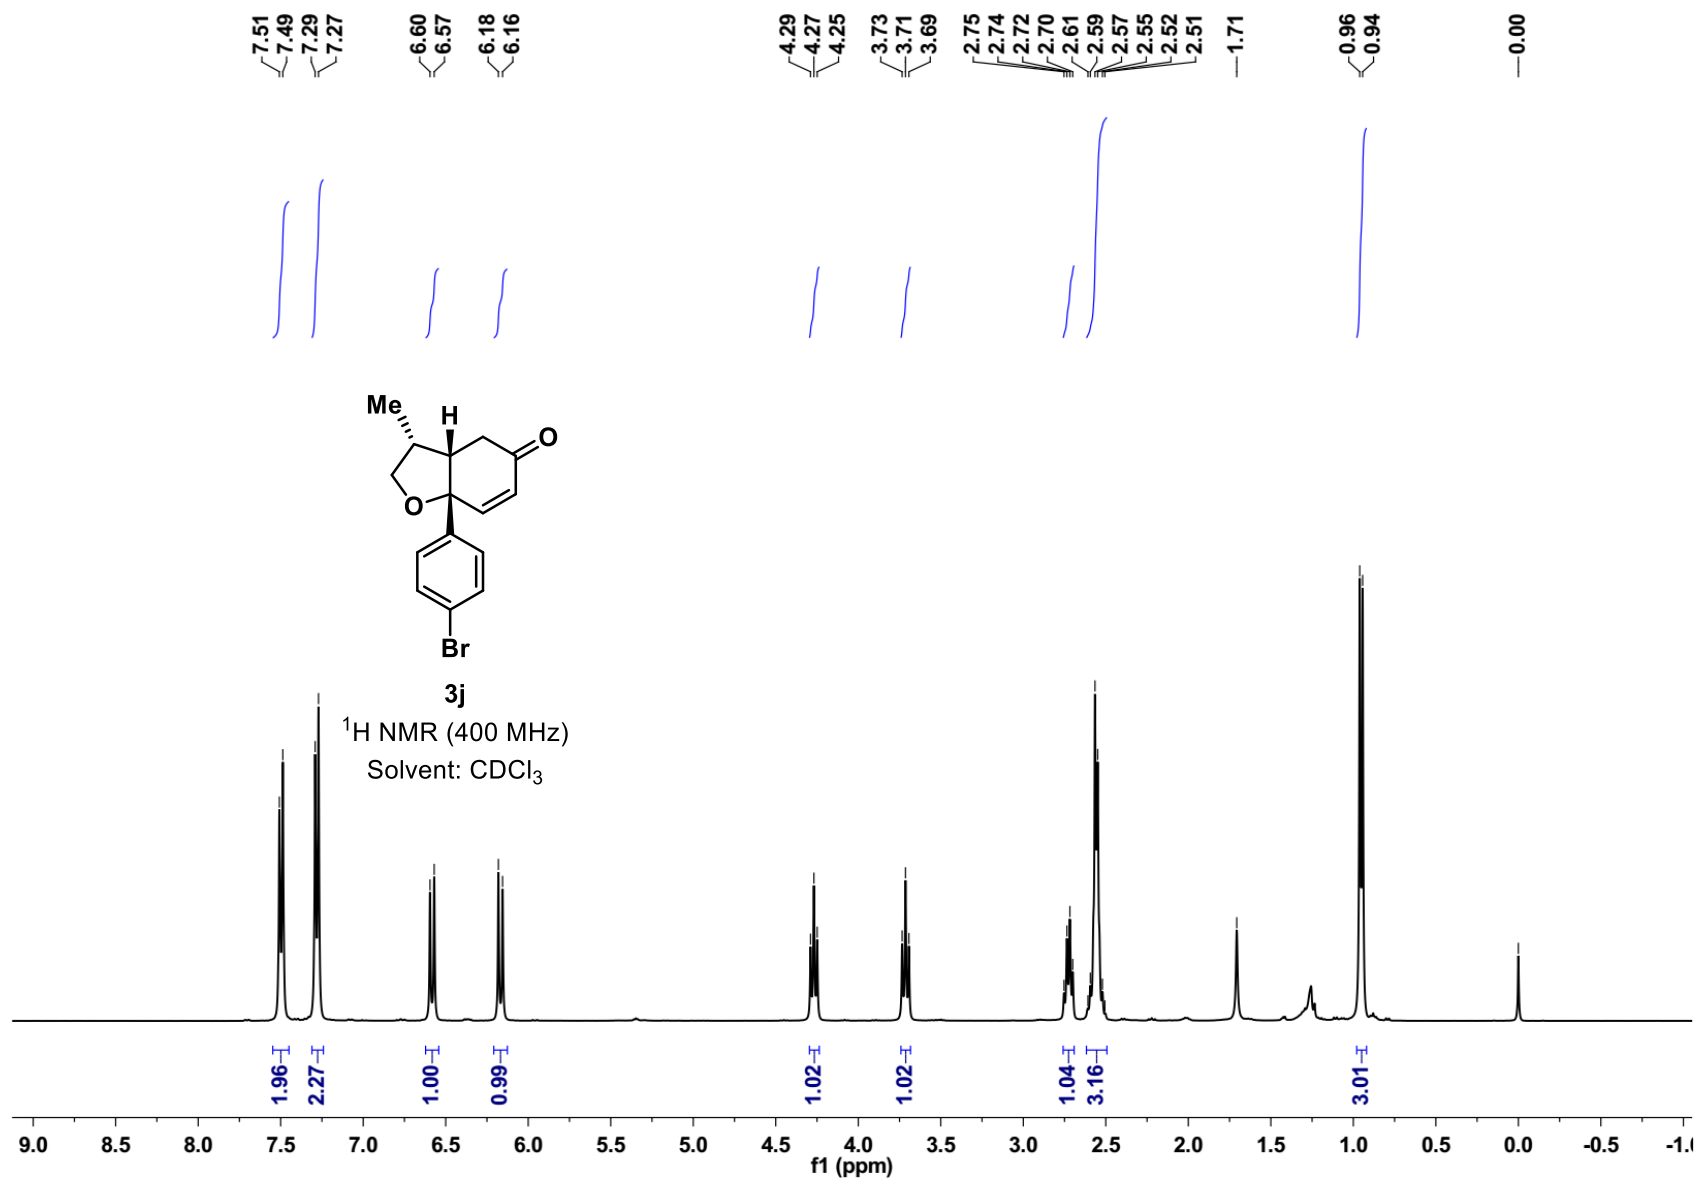

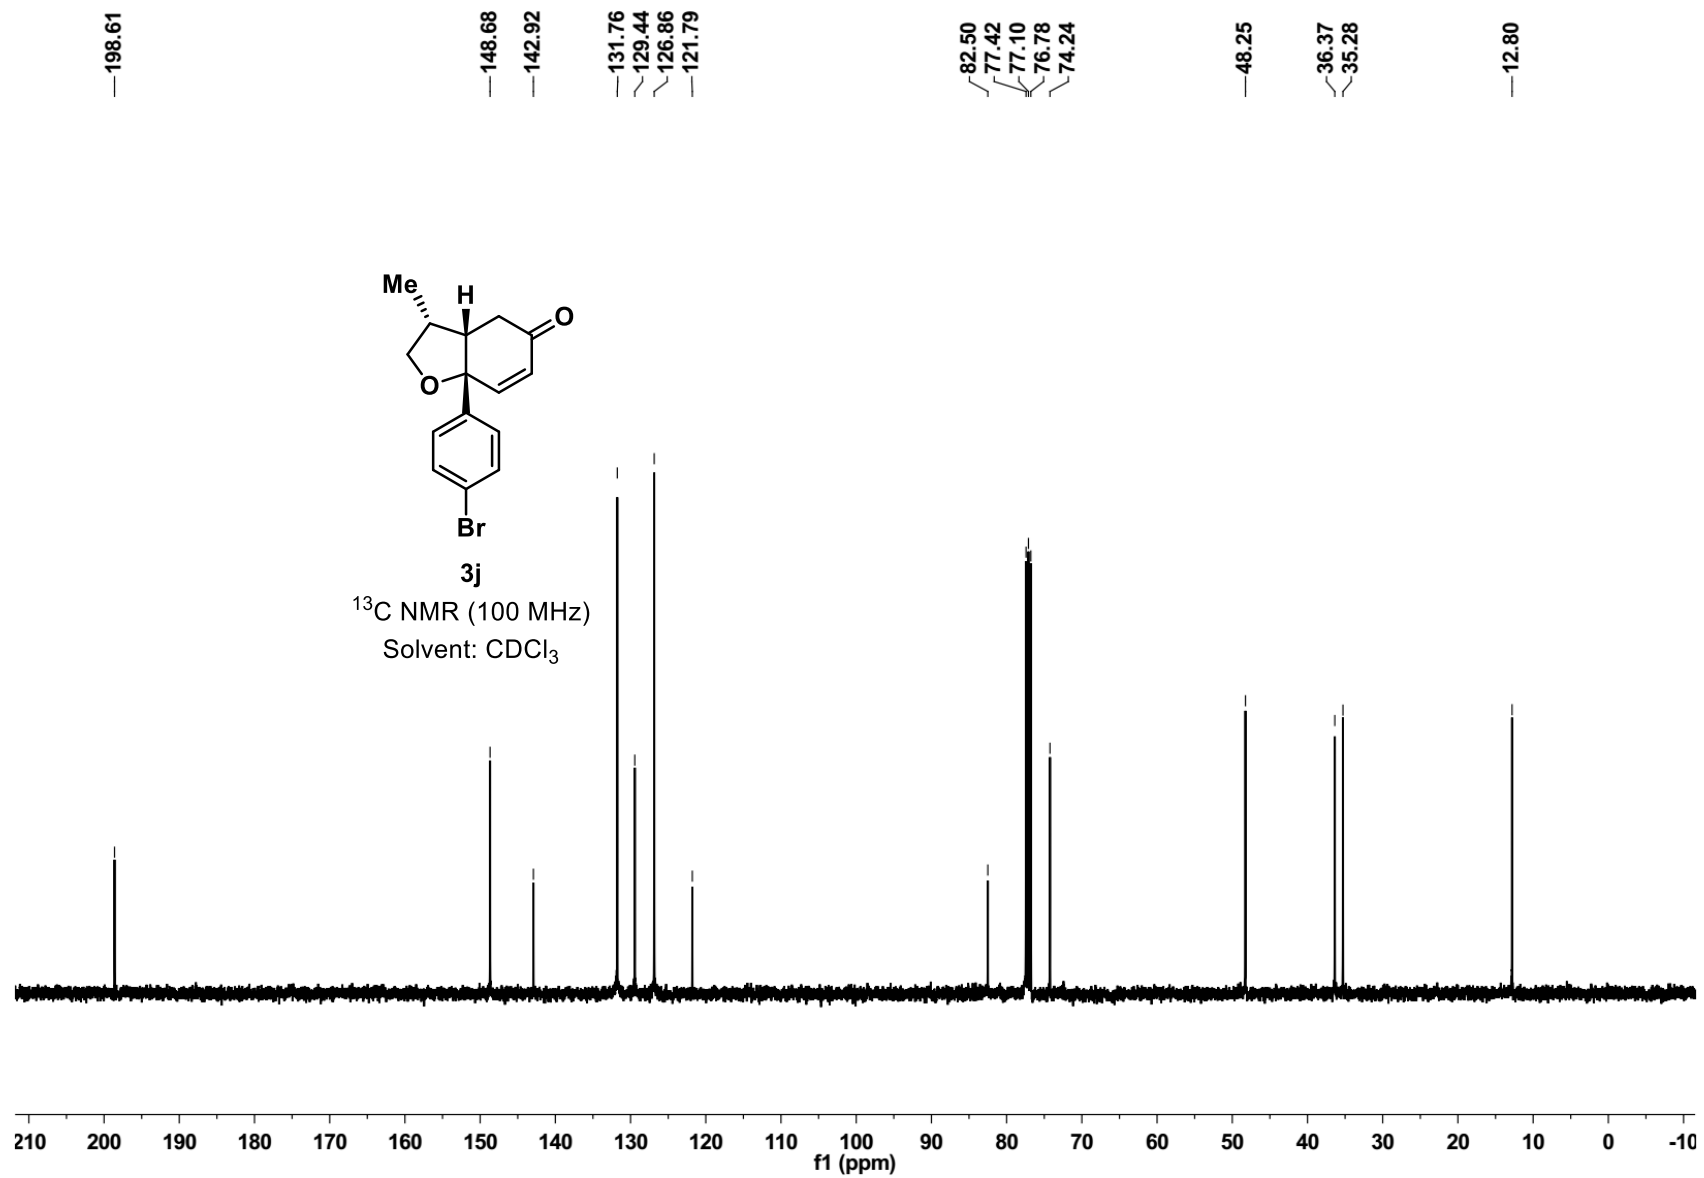

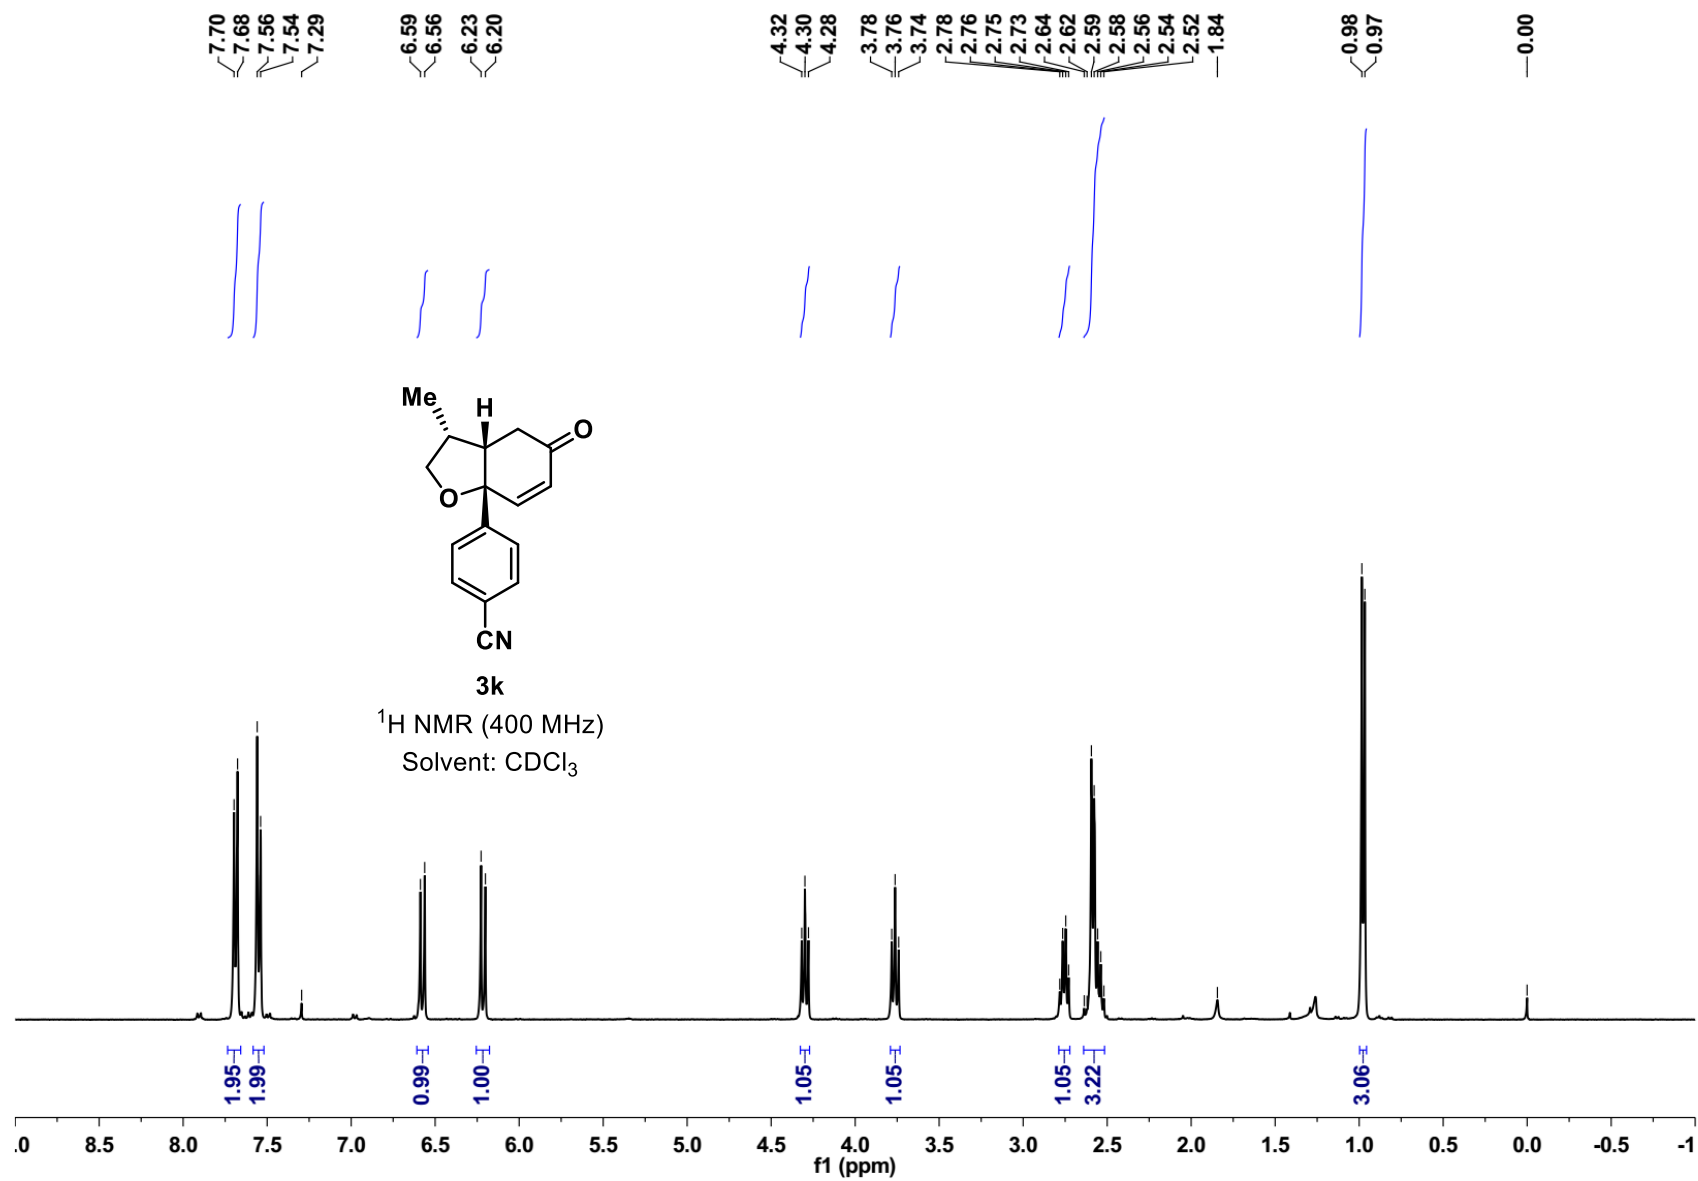

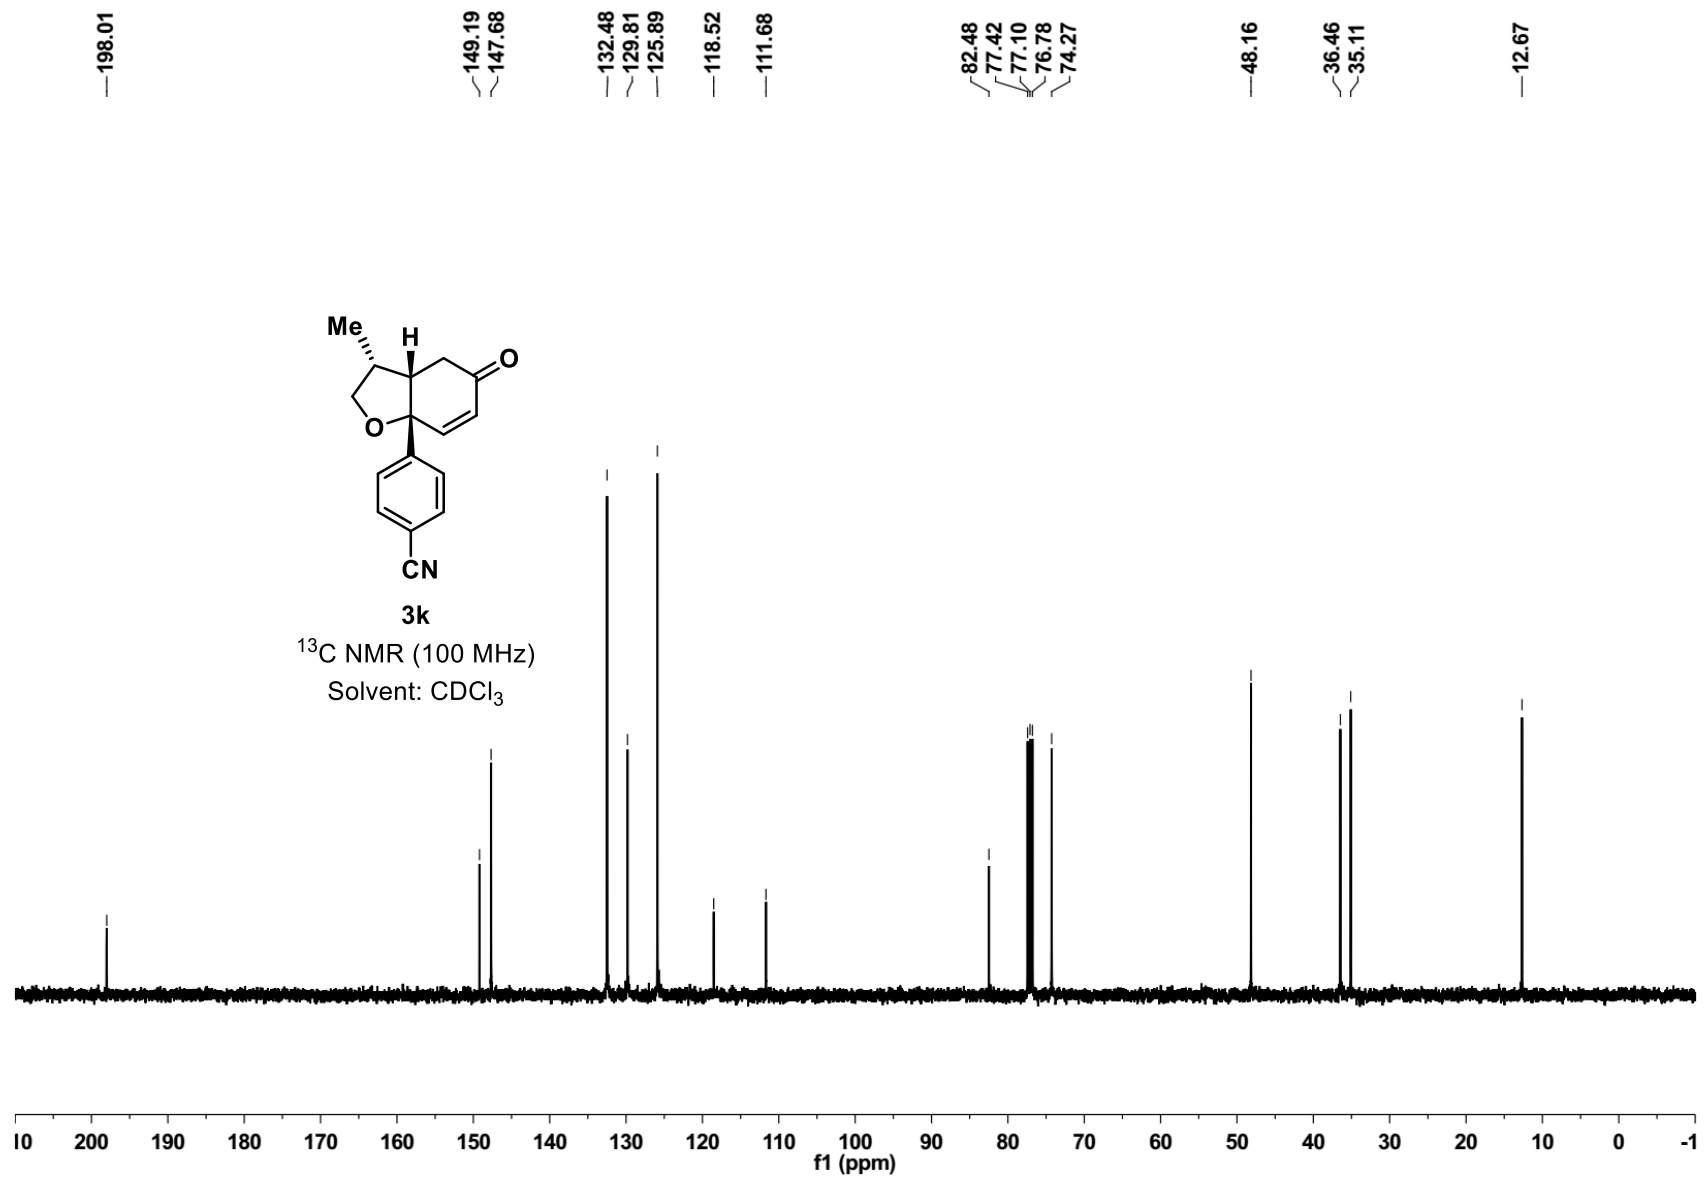

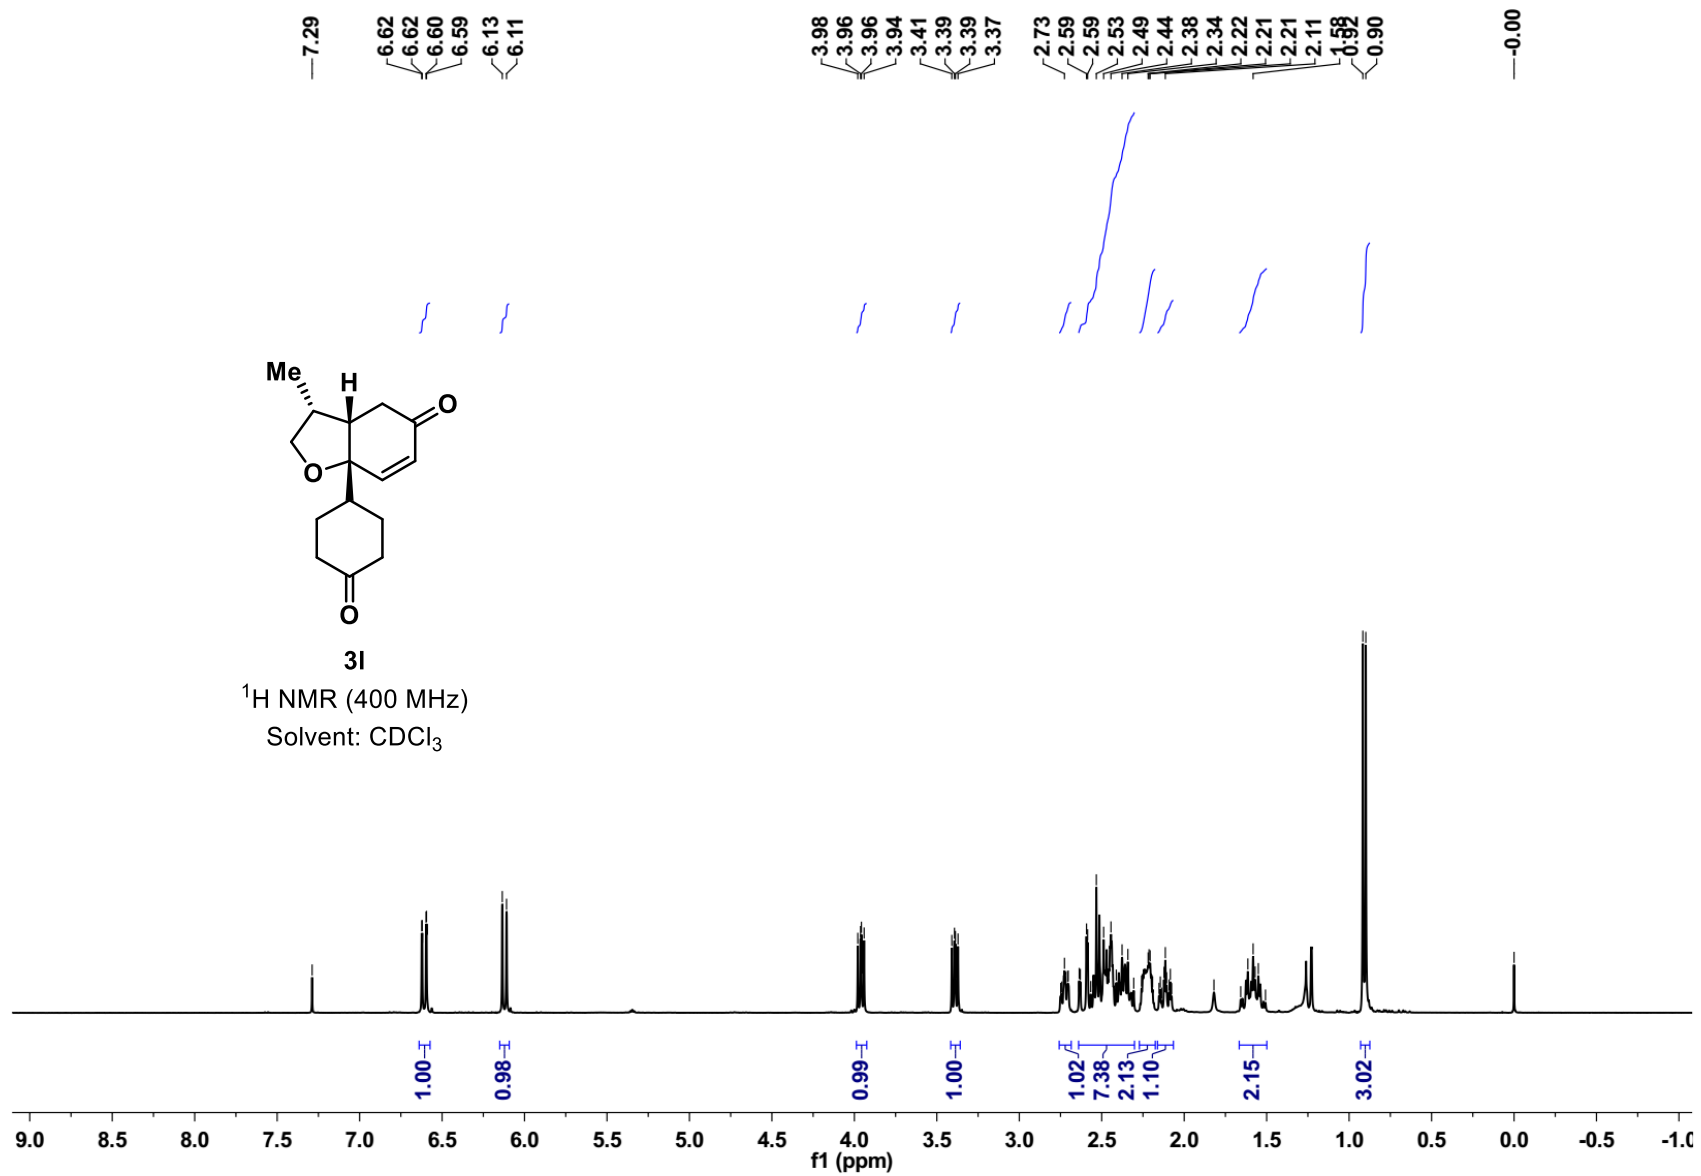

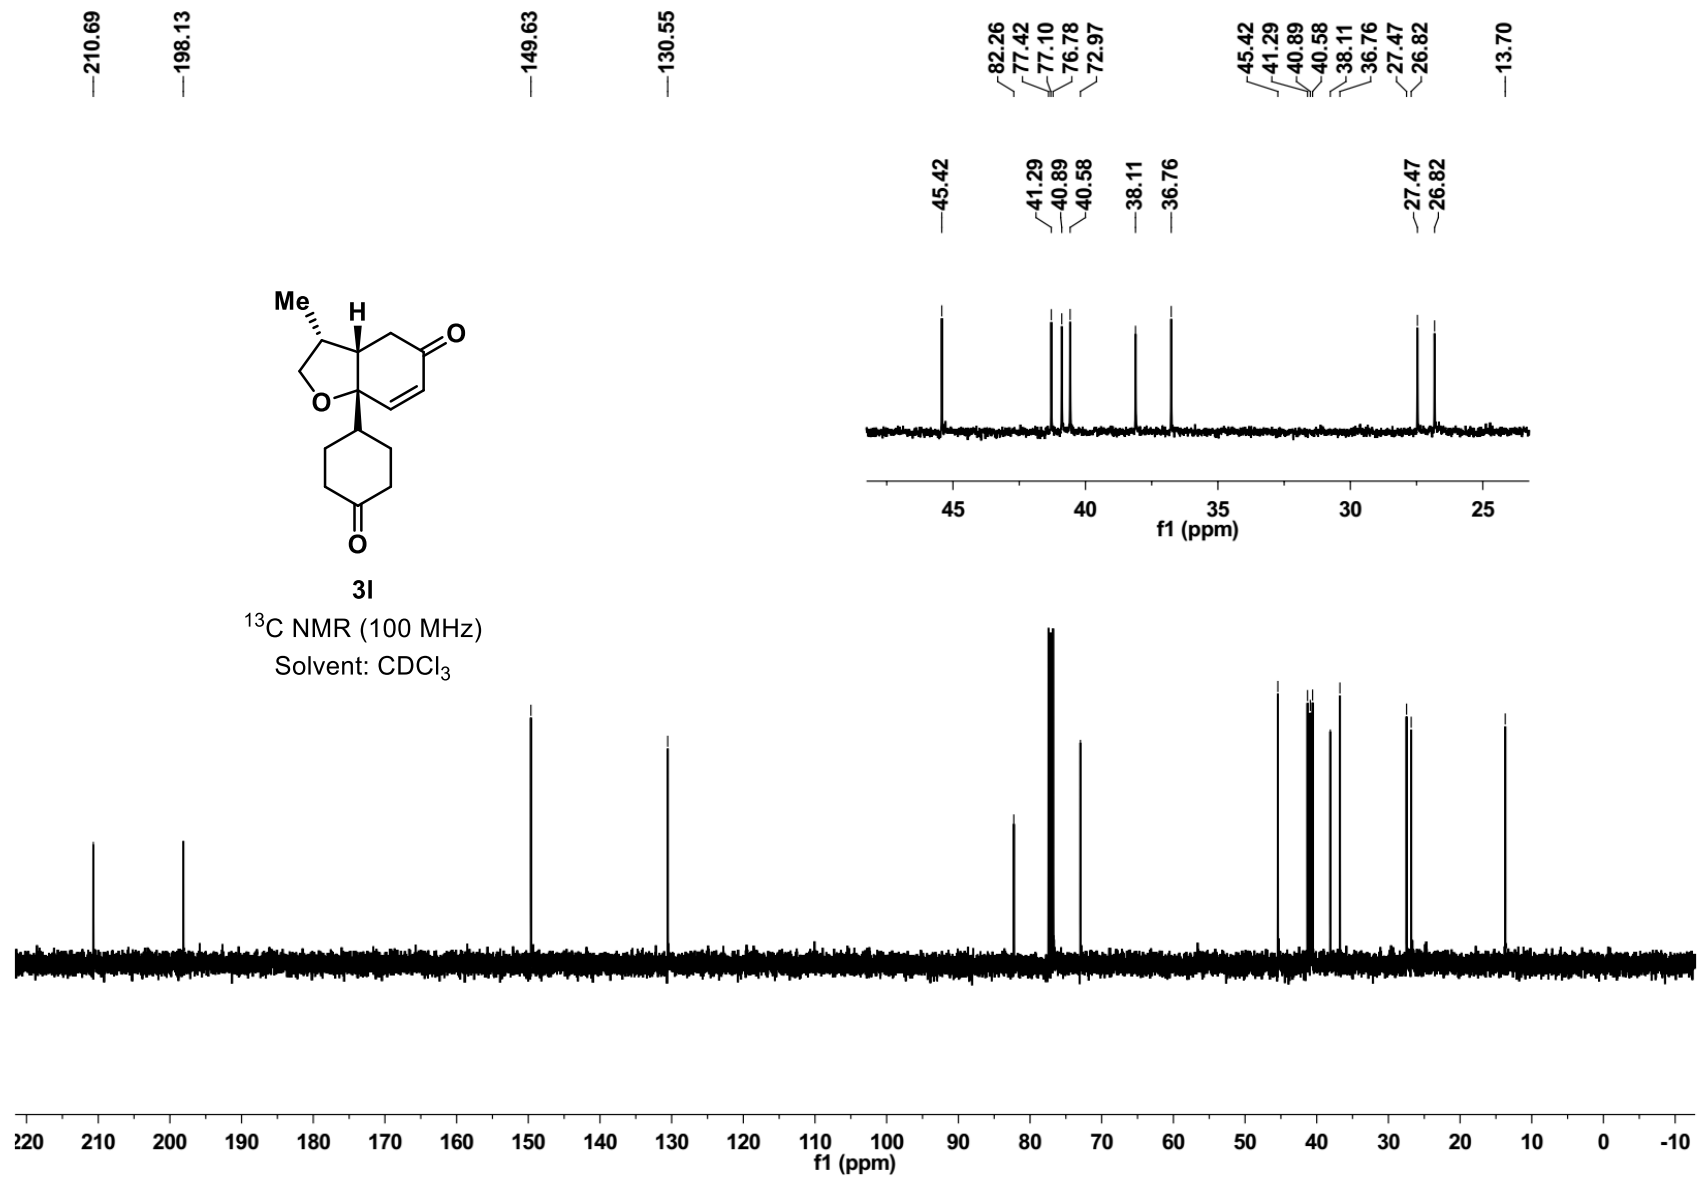

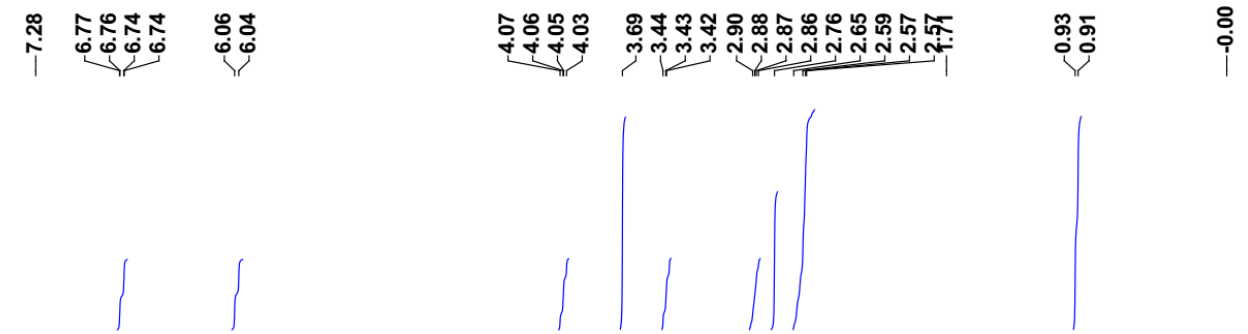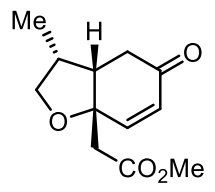

**3m**

<sup>1</sup>H NMR (400 MHz)  
Solvent: CDCl<sub>3</sub>

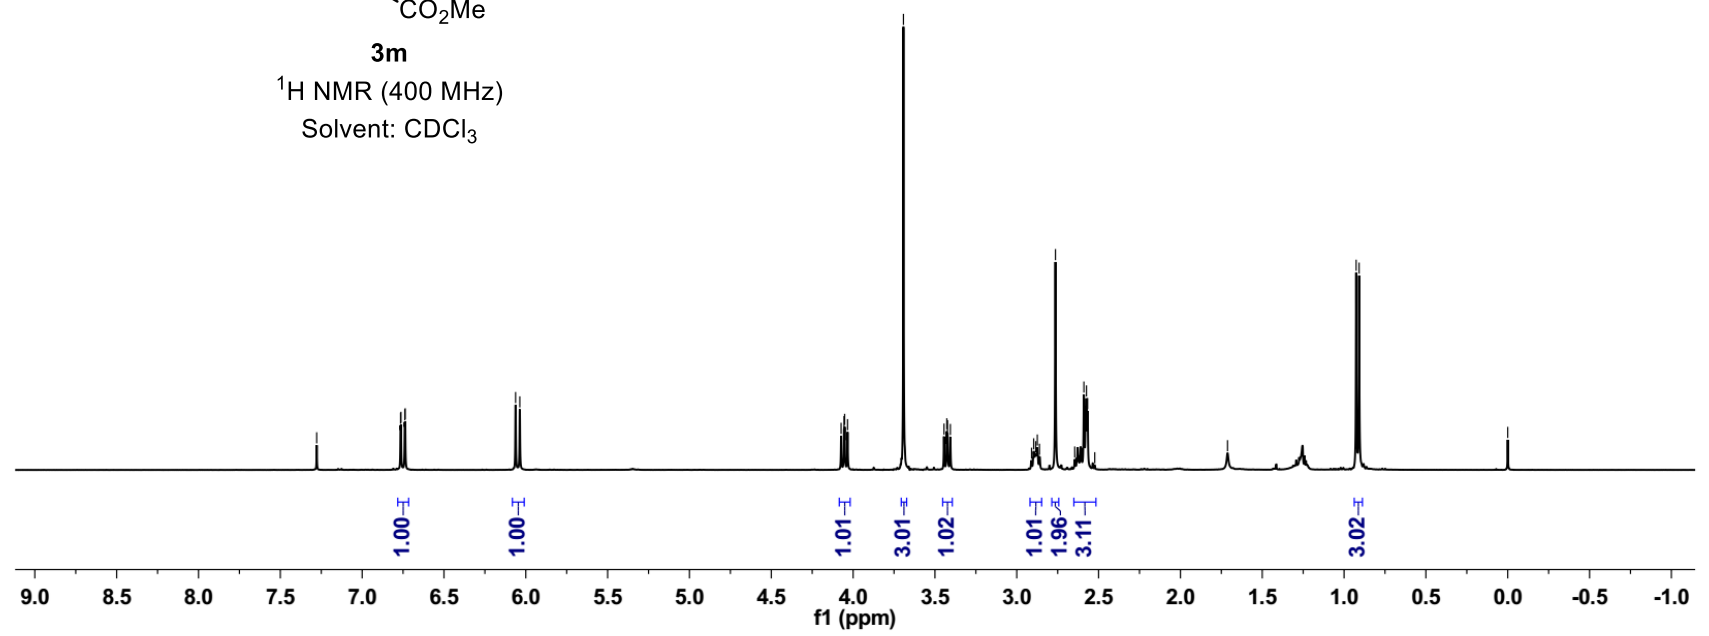

—198.18

—169.98

—149.42

—129.81

78.87  
77.42  
77.10  
76.78  
73.50

—52.02

44.11

43.83

36.95

35.64

—13.67

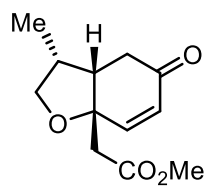

**3m**

<sup>13</sup>C NMR (100 MHz)

Solvent: CDCl<sub>3</sub>

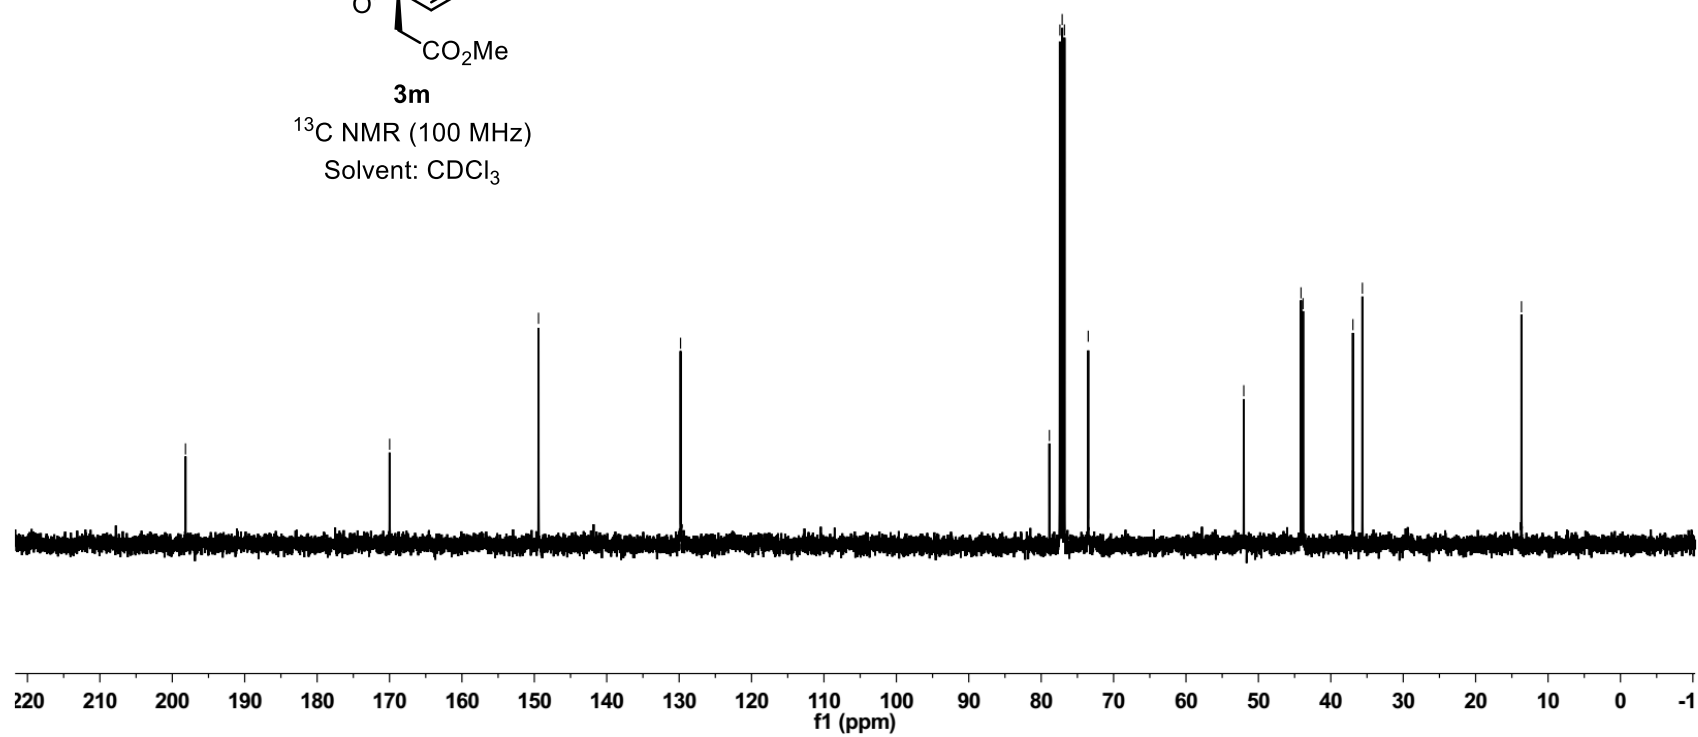



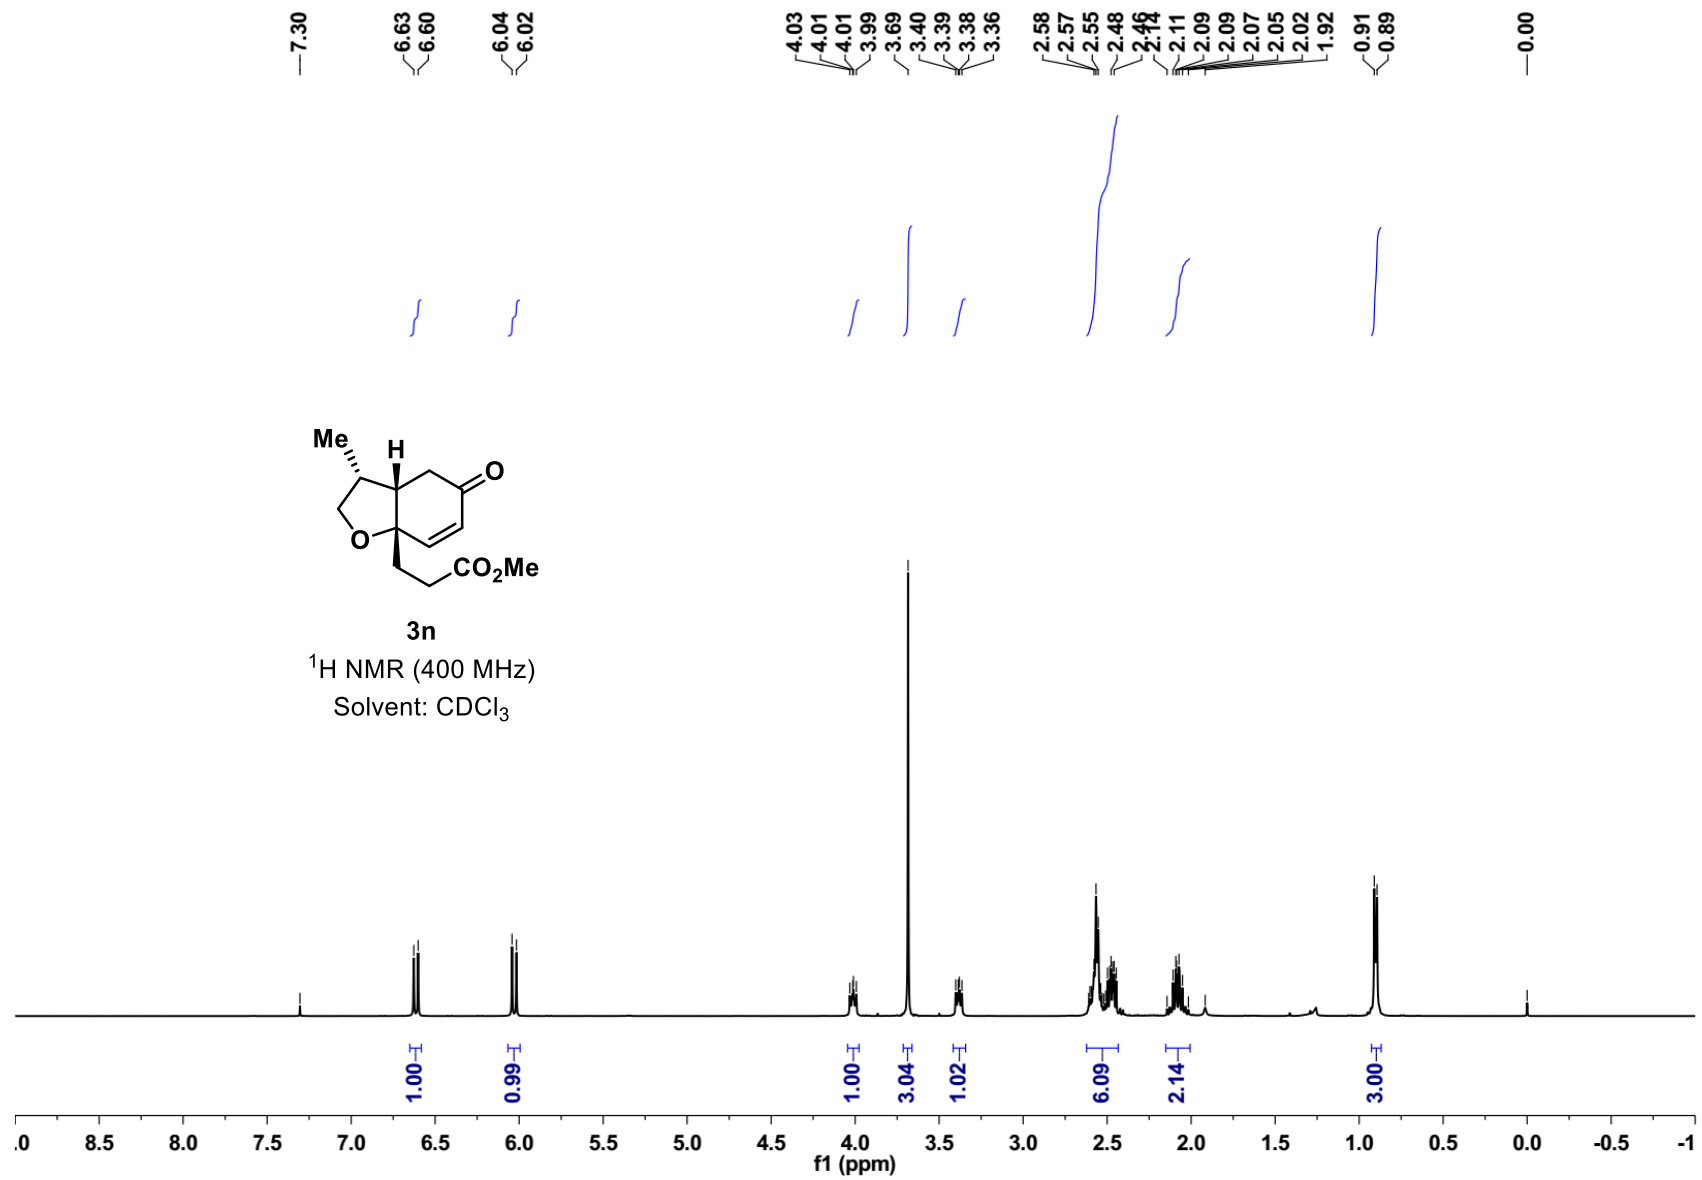

—198.11

—173.54

—150.63

—129.75

80.04  
77.42  
77.10  
76.78  
73.49

—51.79

—43.53

36.91

35.66

33.81

28.69

—13.83

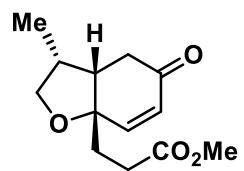

**3n**

<sup>13</sup>C NMR (100 MHz)

Solvent: CDCl<sub>3</sub>

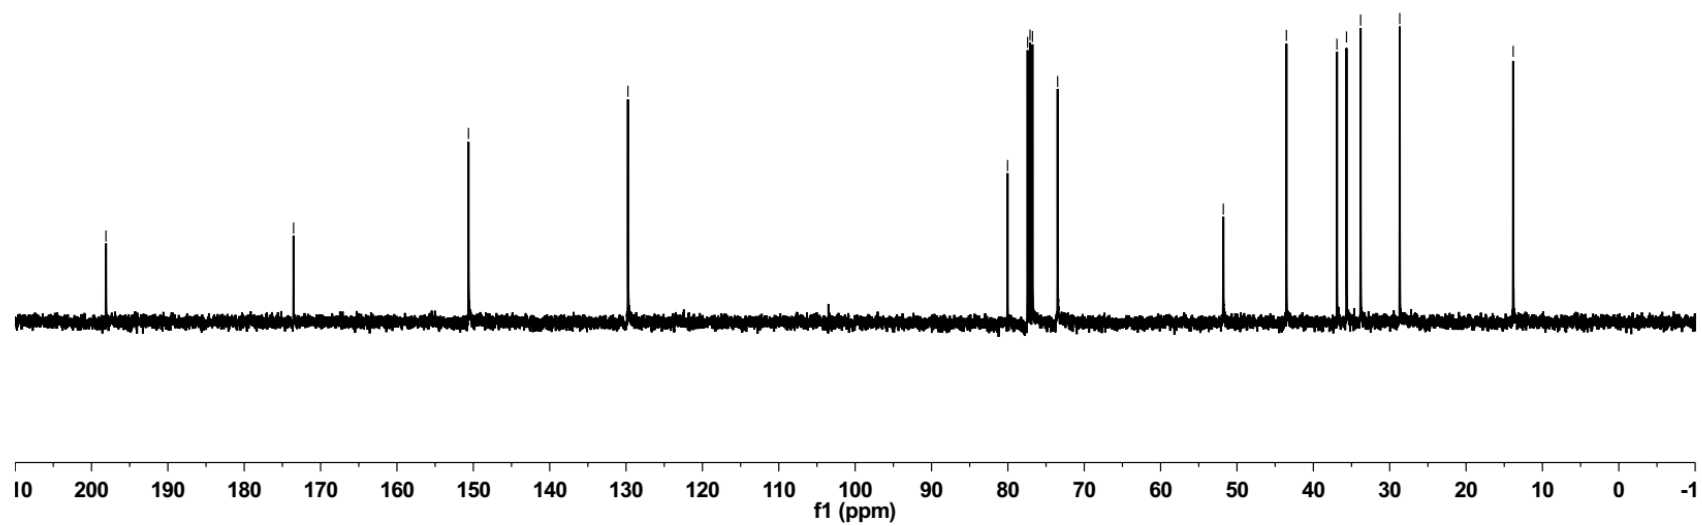

7.30 6.66 6.65 6.63 6.63 6.05 6.02 4.30 4.29 4.28 4.27 4.25 4.24 4.23 4.21 4.21 4.20 4.18 4.06 4.04 4.04 4.02 3.38 3.37 3.36 2.59 2.58 2.58 2.56 2.13 2.11 2.10 2.08 2.07 2.05 2.04 0.93 0.90 0.00

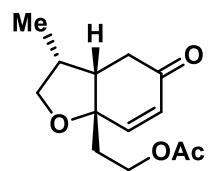

**3o**

<sup>1</sup>H NMR (400 MHz)

Solvent: CDCl<sub>3</sub>

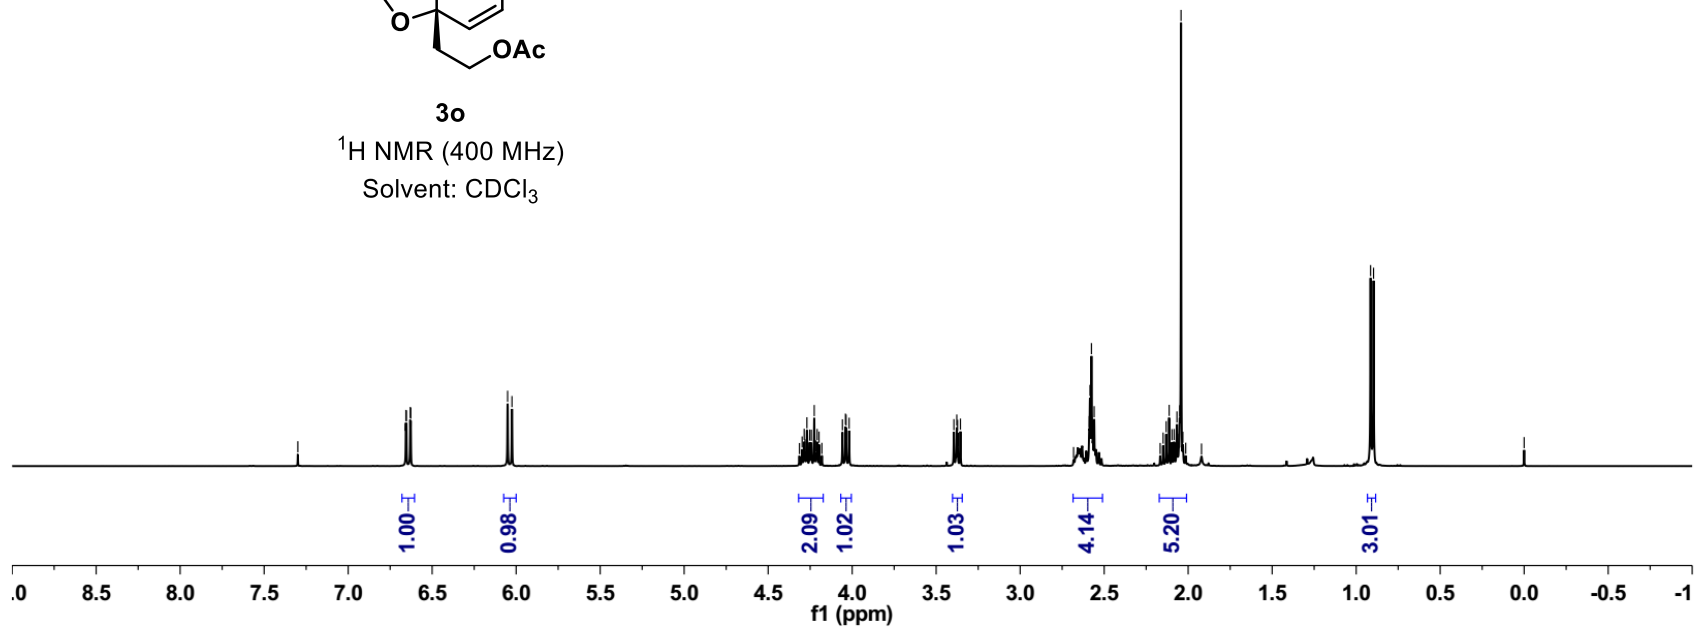

—198.16

—170.88

—150.87

—129.76

79.75  
77.42  
77.10  
76.78  
73.43

—60.27

44.01  
37.89  
36.85  
35.62

—21.03

—13.92

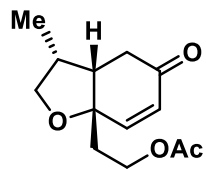

**3o**

<sup>13</sup>C NMR (100 MHz)  
Solvent: CDCl<sub>3</sub>

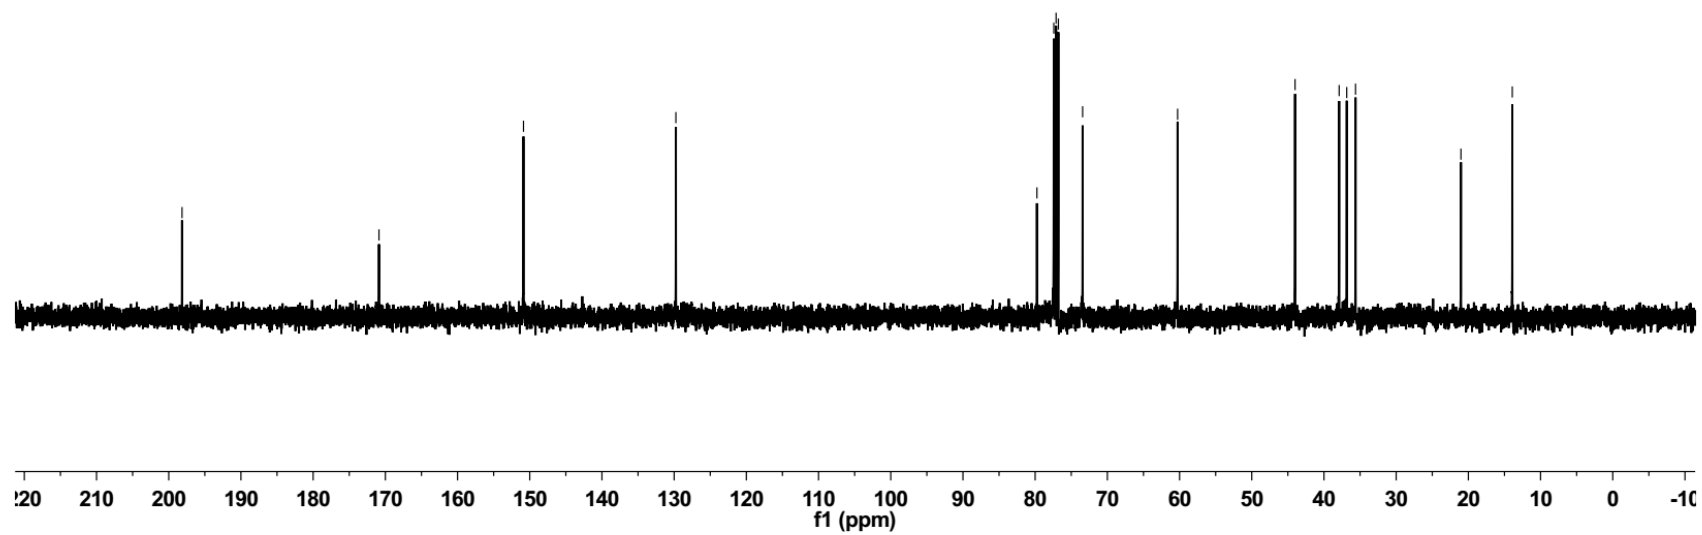

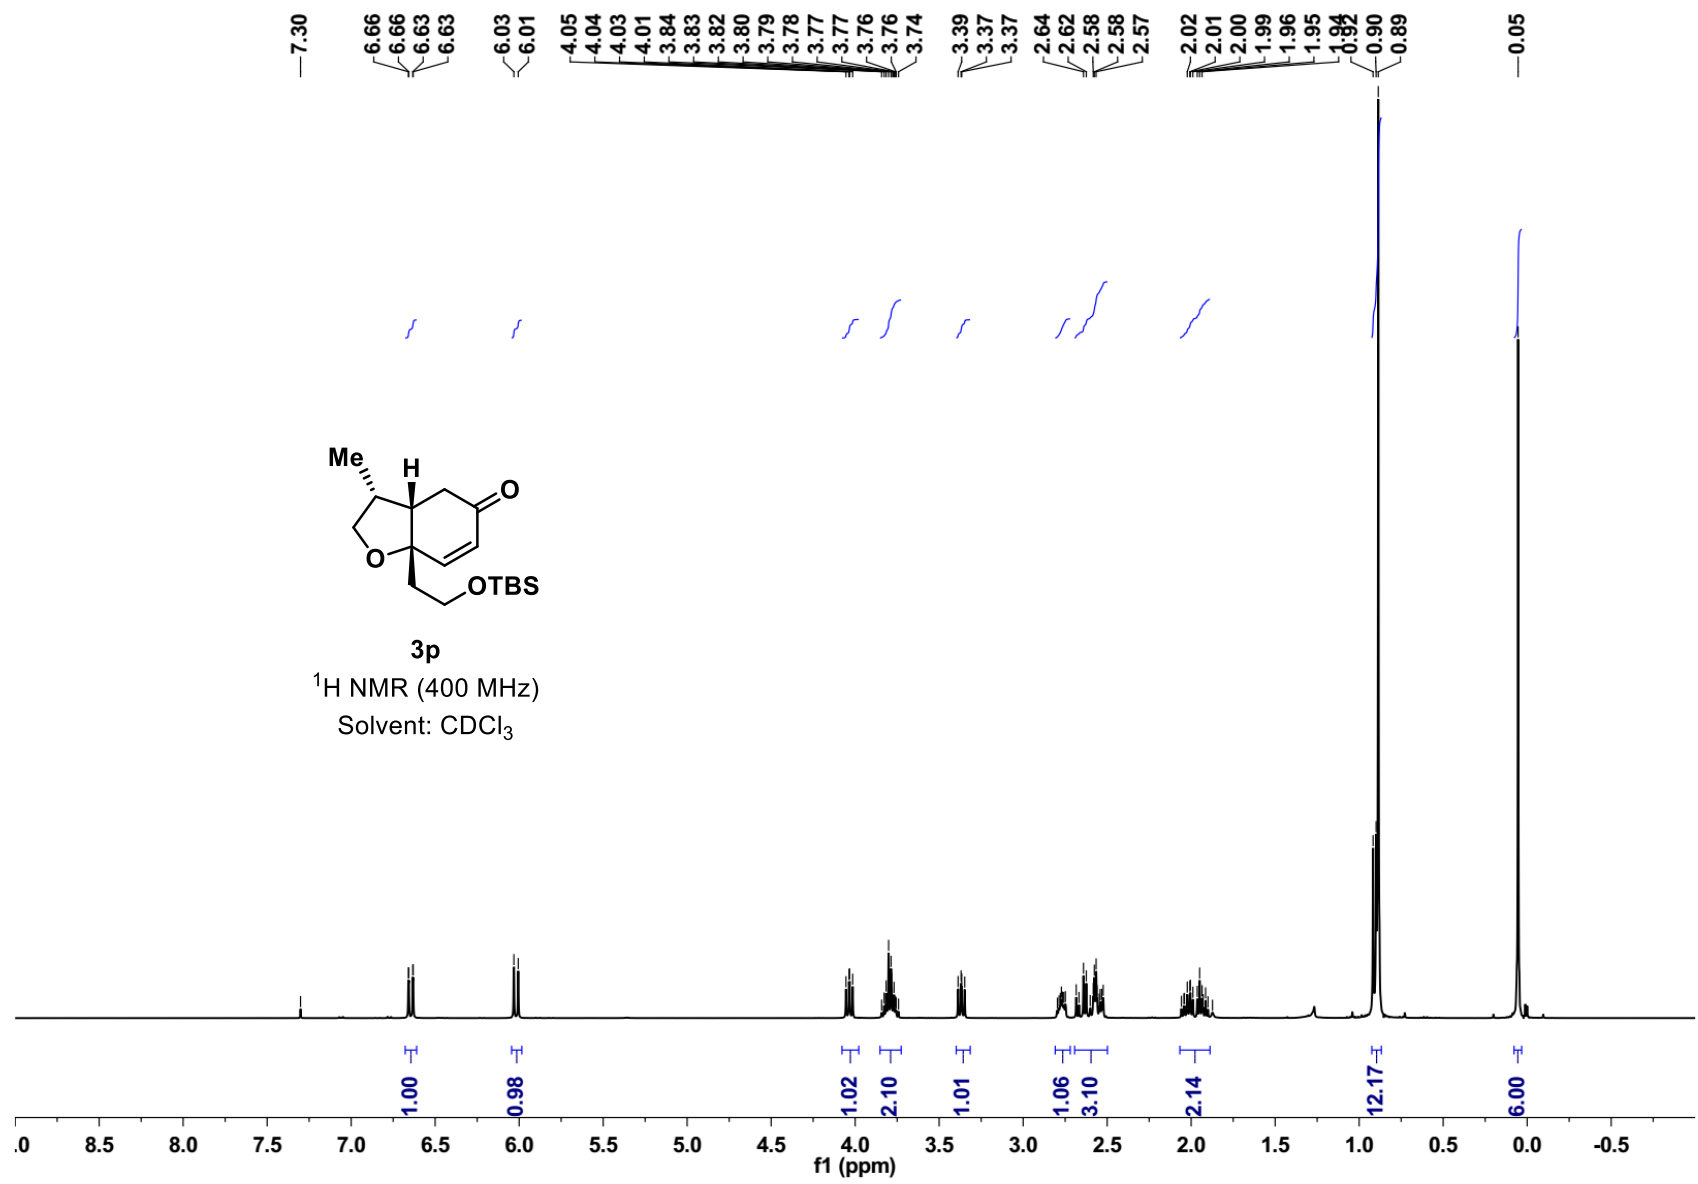

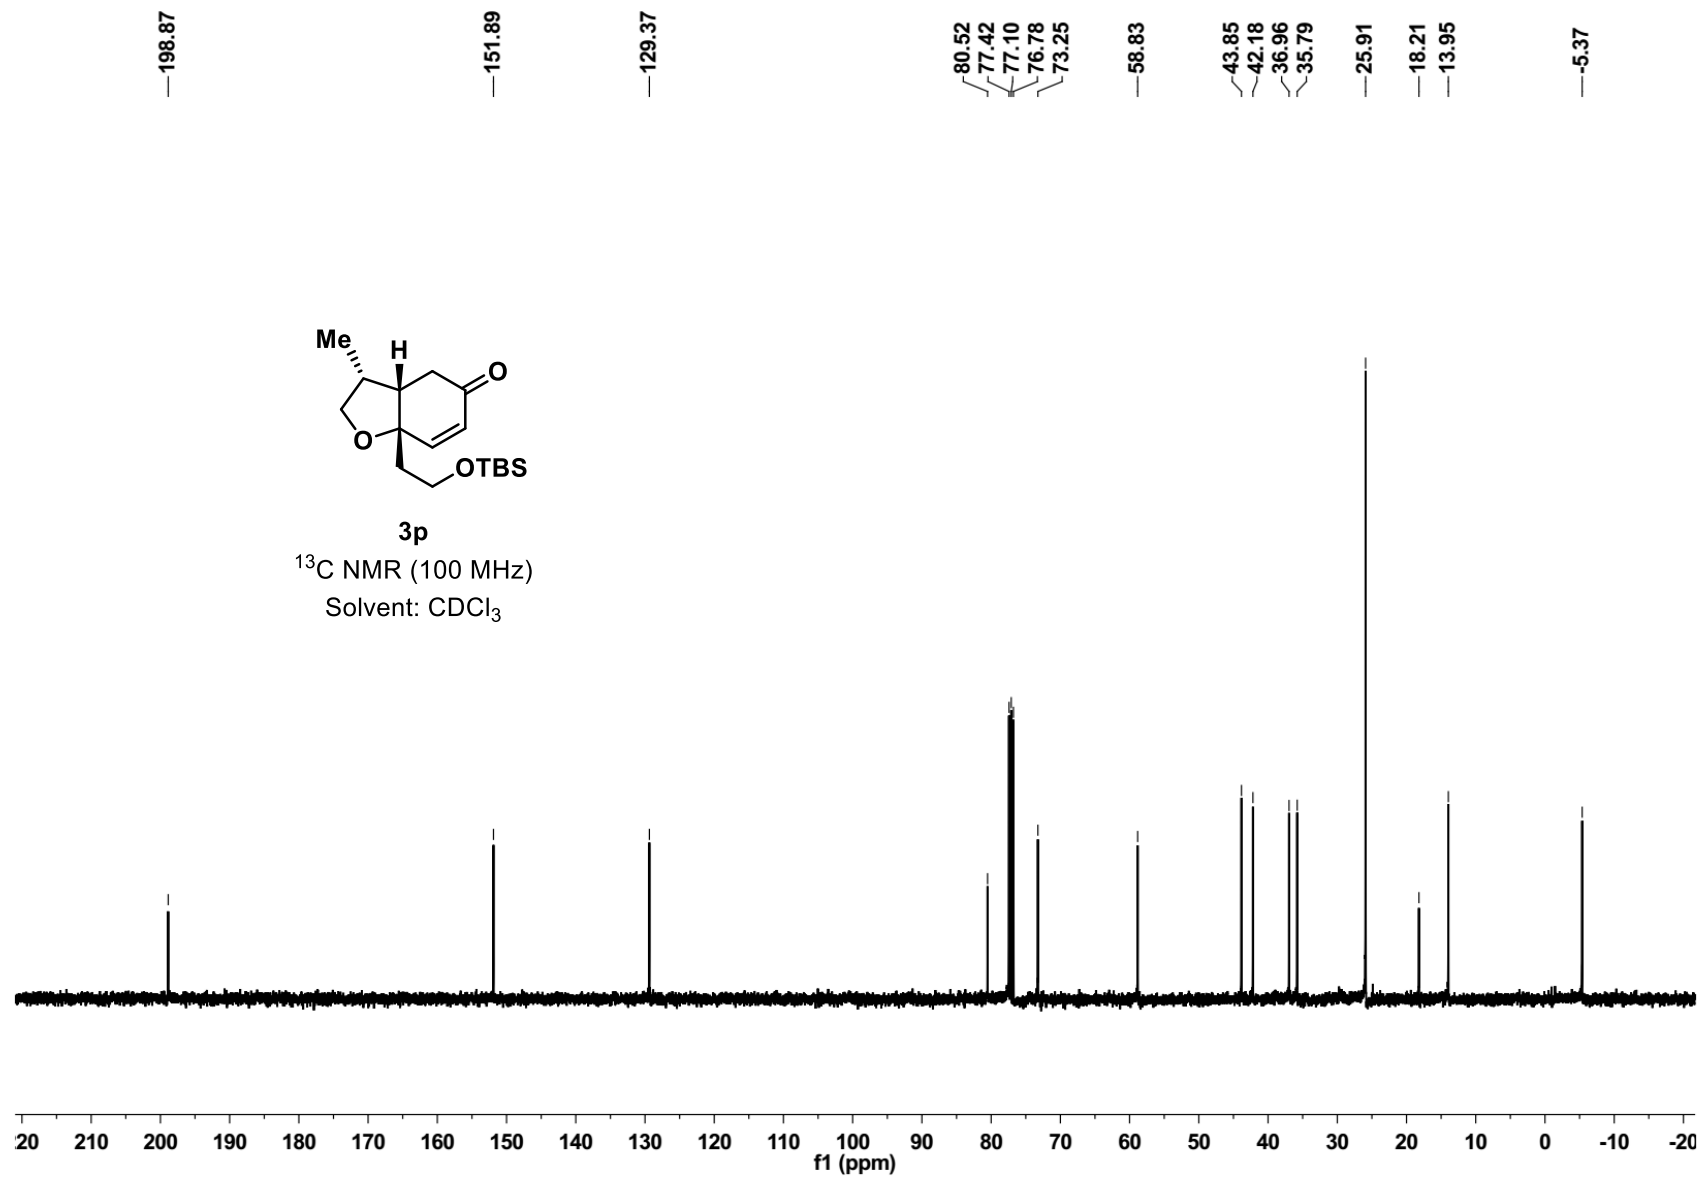

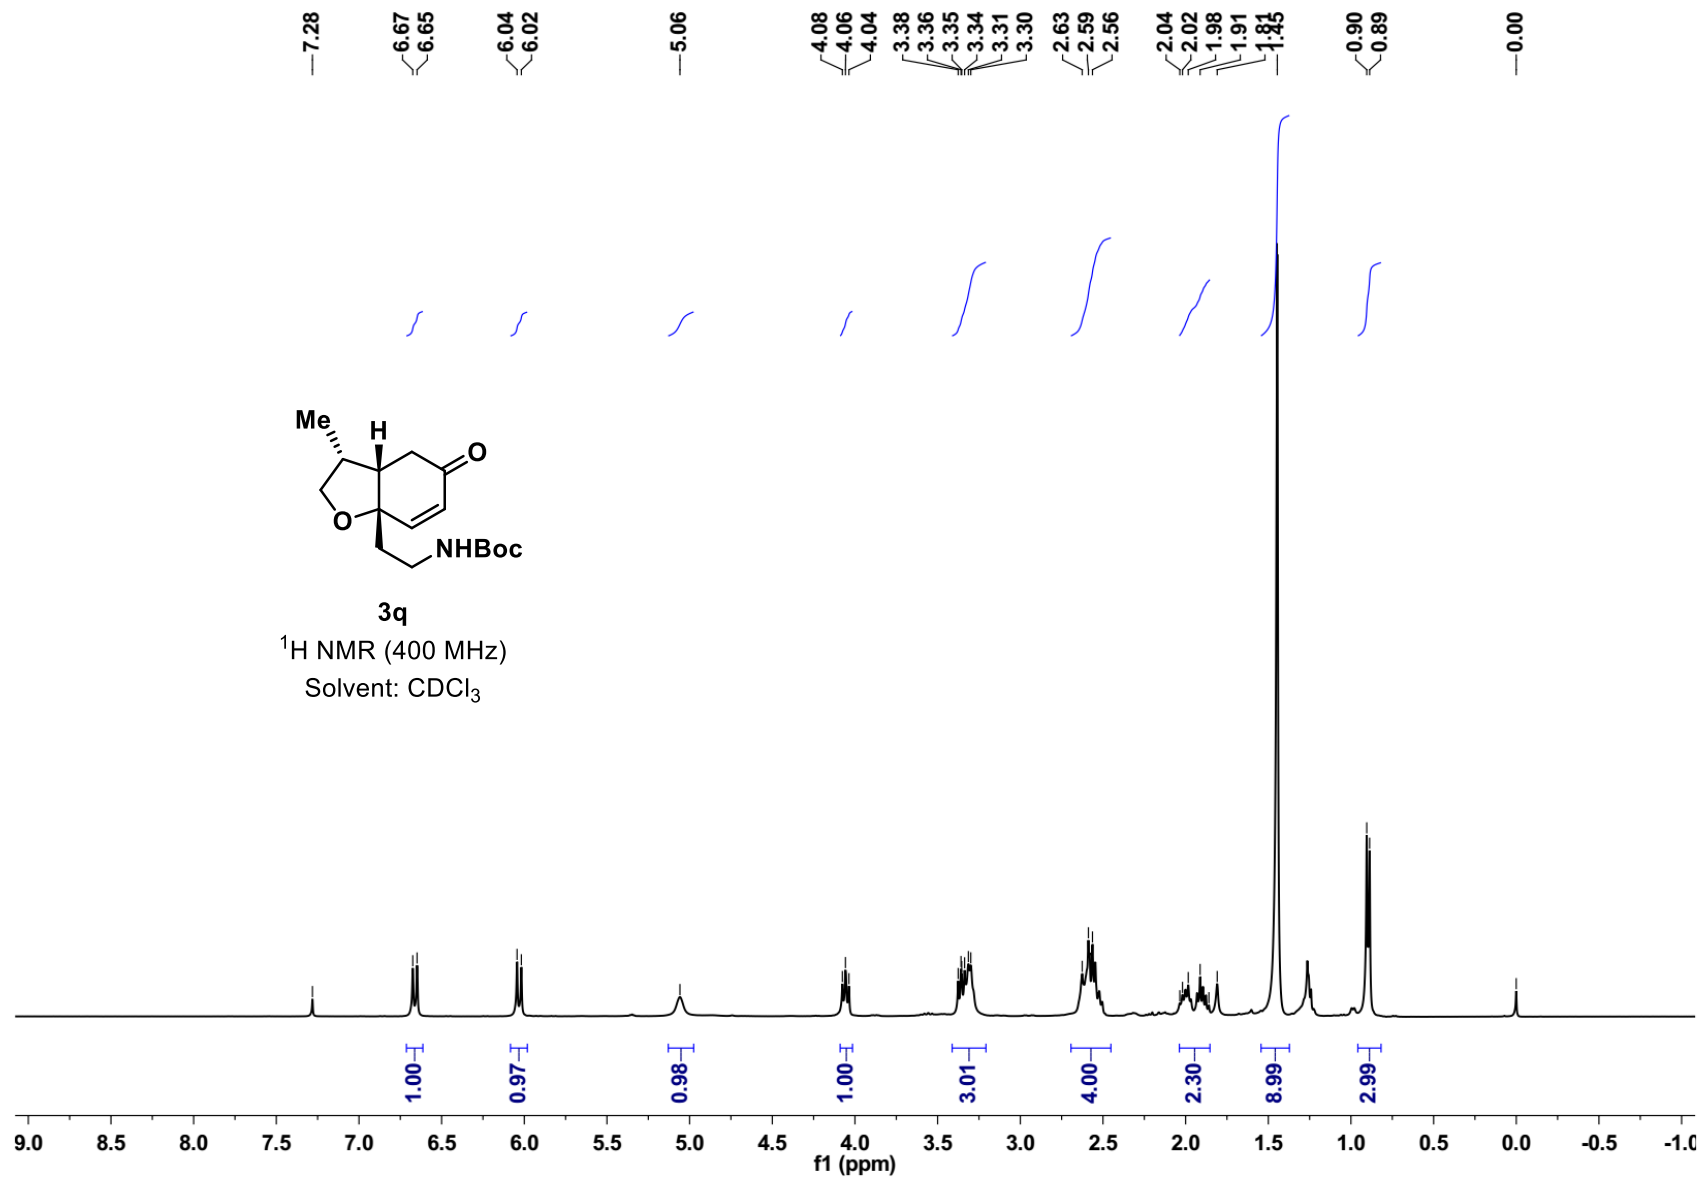

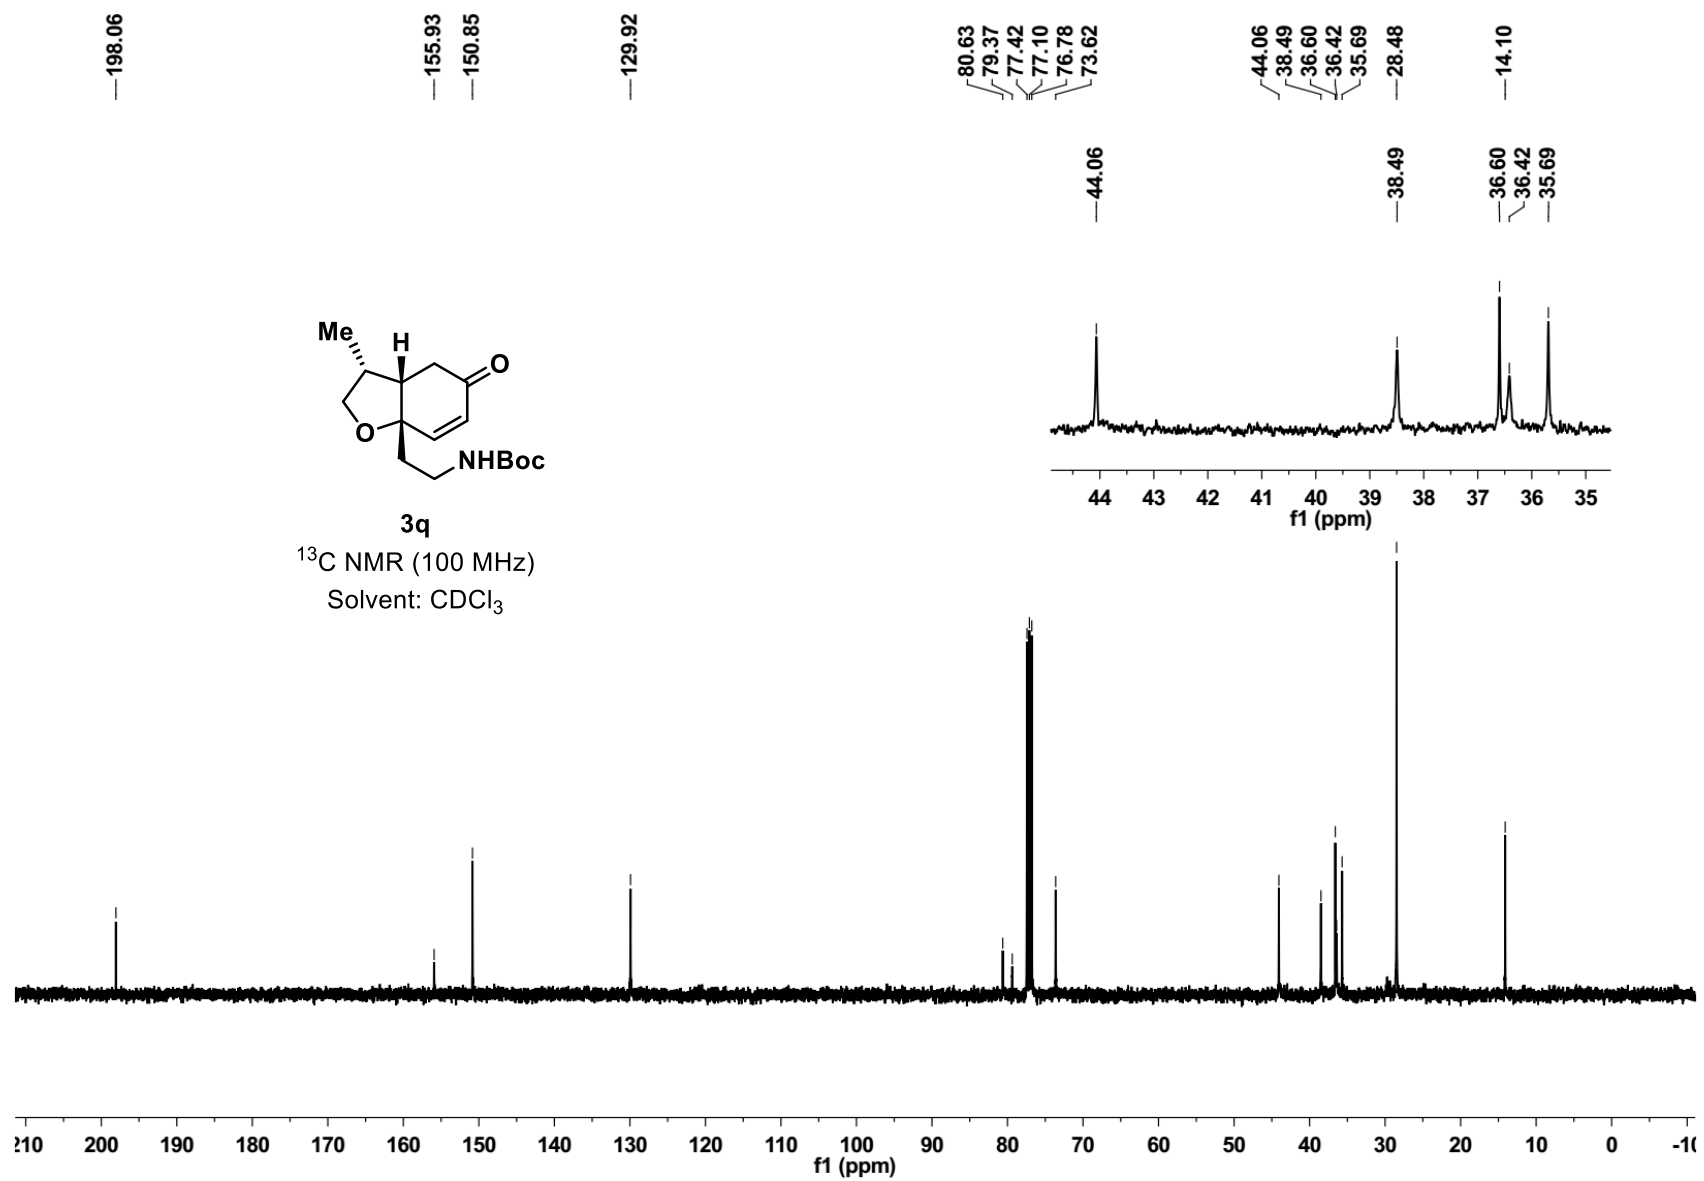



7.29  
 6.64  
 6.64  
 6.61  
 6.61  
 6.05  
 6.02  
 4.05  
 4.03  
 4.03  
 4.01  
 3.60  
 3.58  
 3.57  
 3.40  
 3.38  
 2.59  
 2.58  
 2.57  
 2.56  
 2.55  
 1.94  
 1.93  
 1.93  
 1.92  
 1.92  
 1.91  
 1.89  
 1.89  
 0.90  
 -0.00

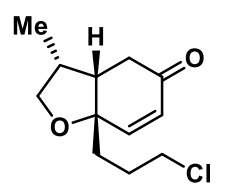

**3r**

<sup>1</sup>H NMR (400 MHz)  
 Solvent: CDCl<sub>3</sub>

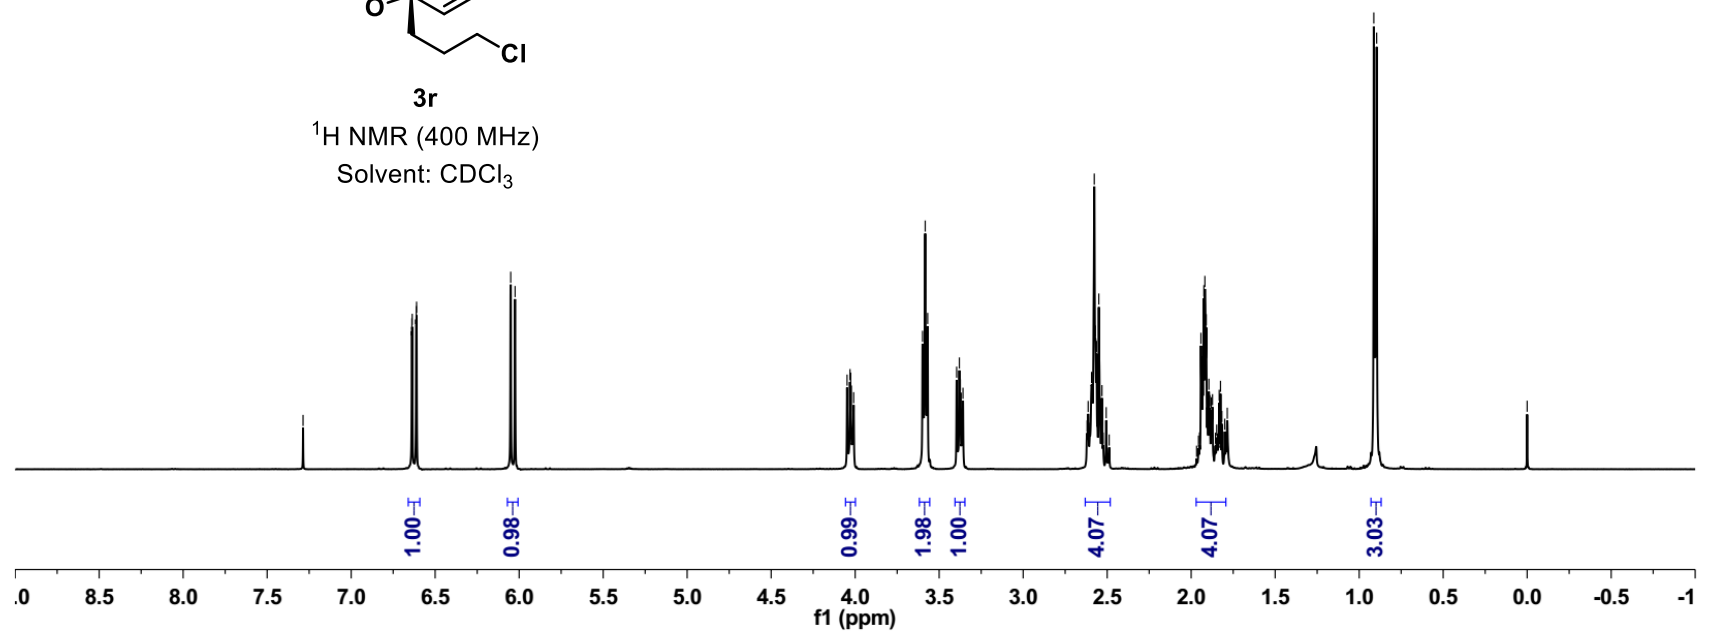

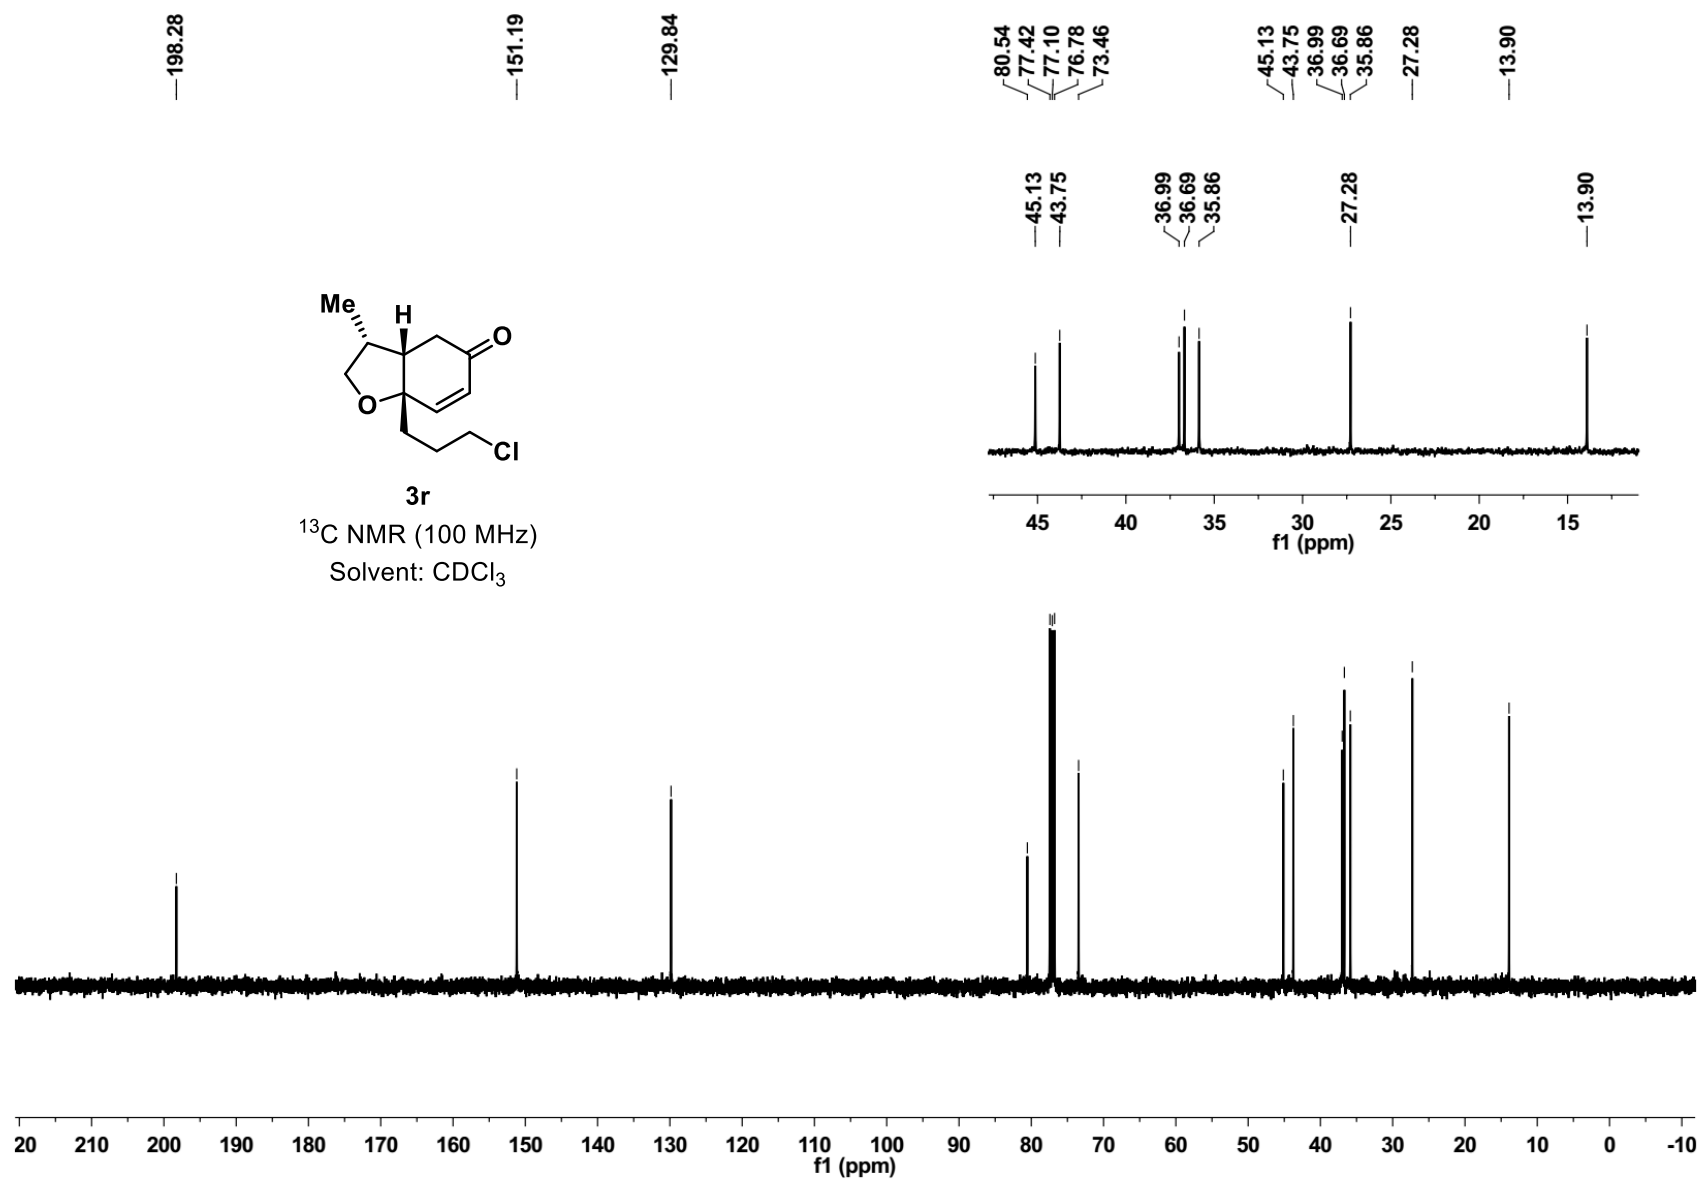

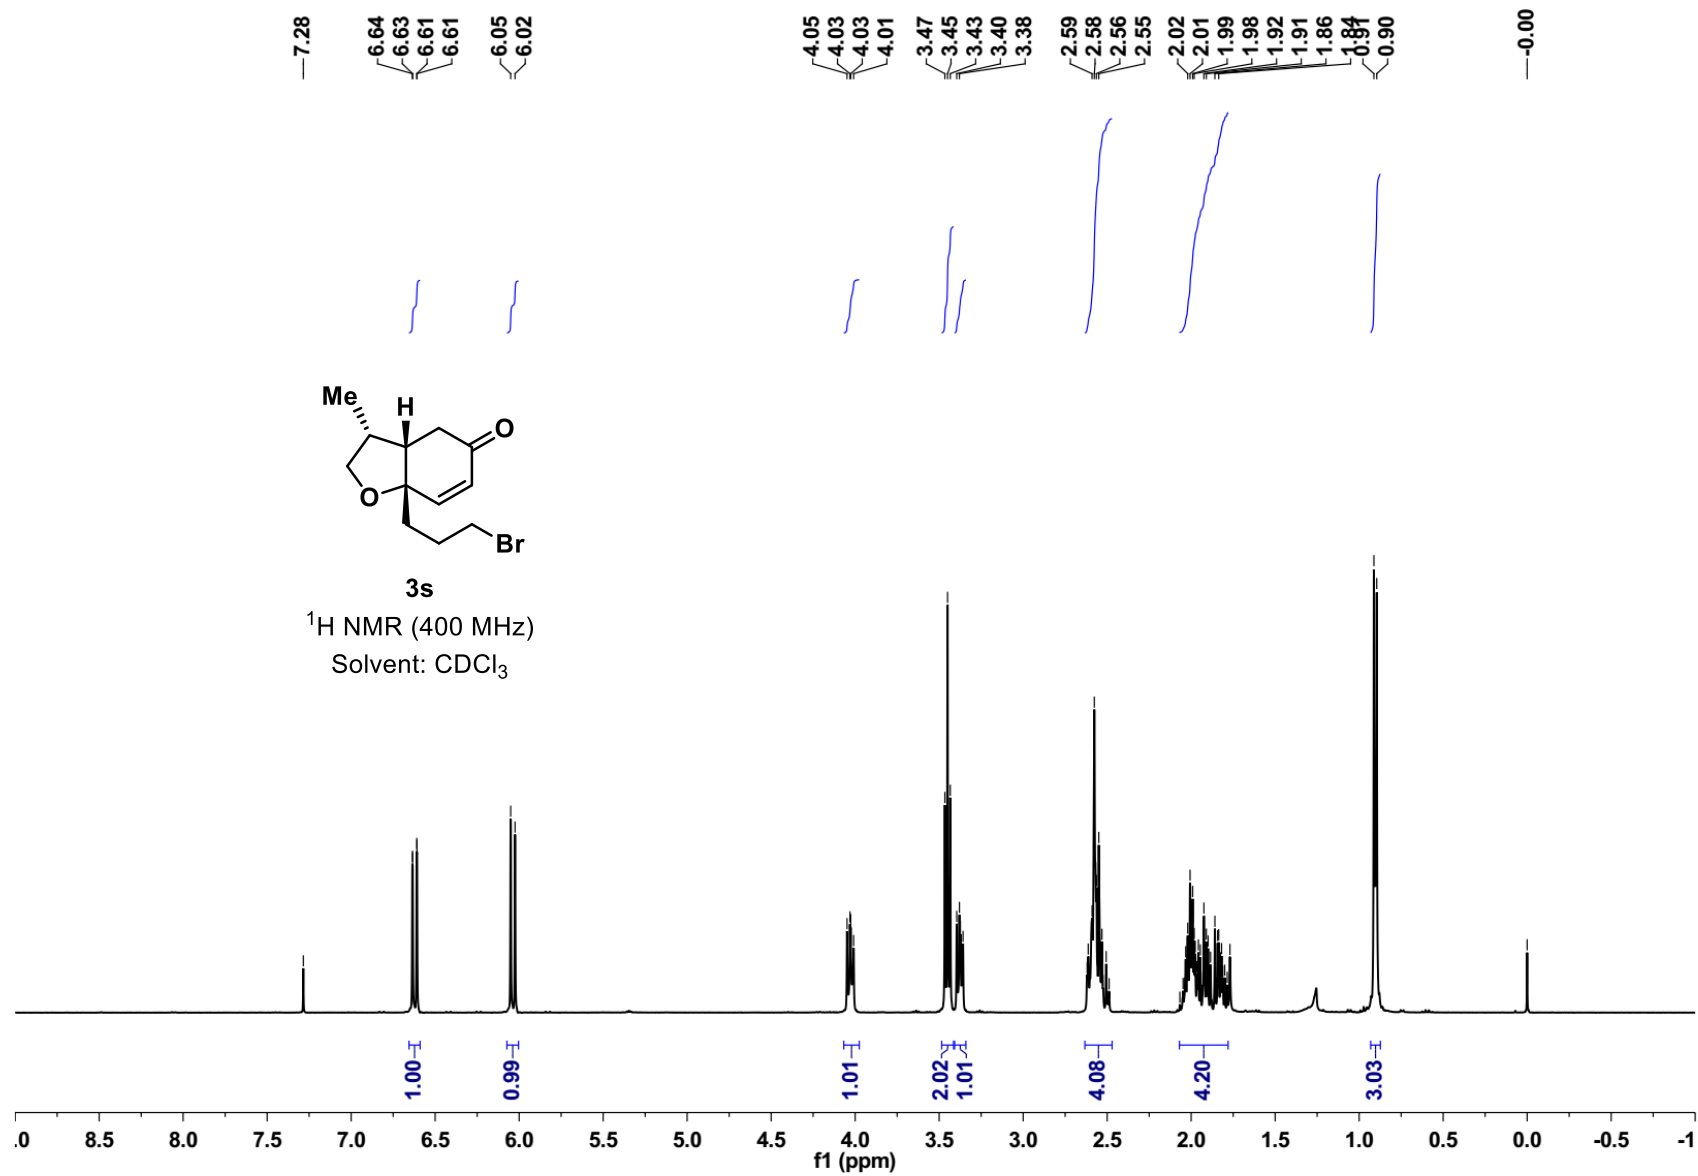

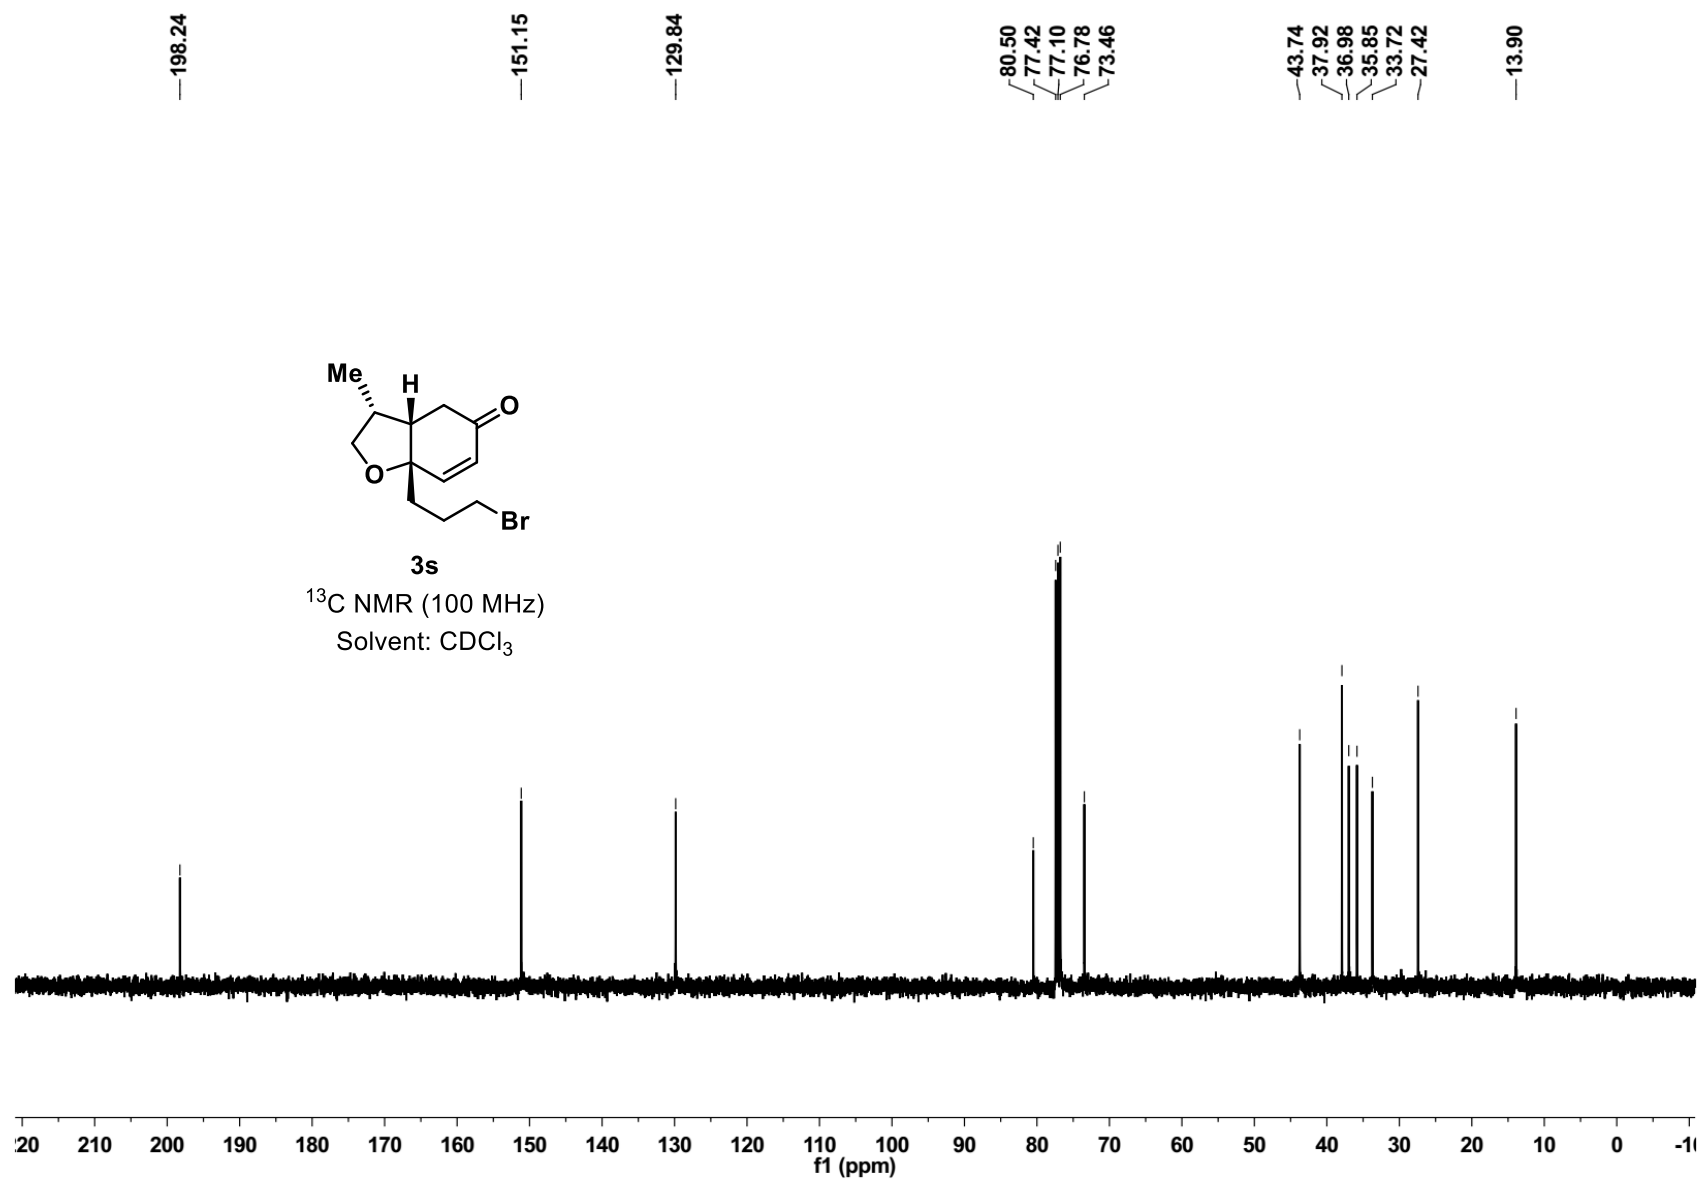

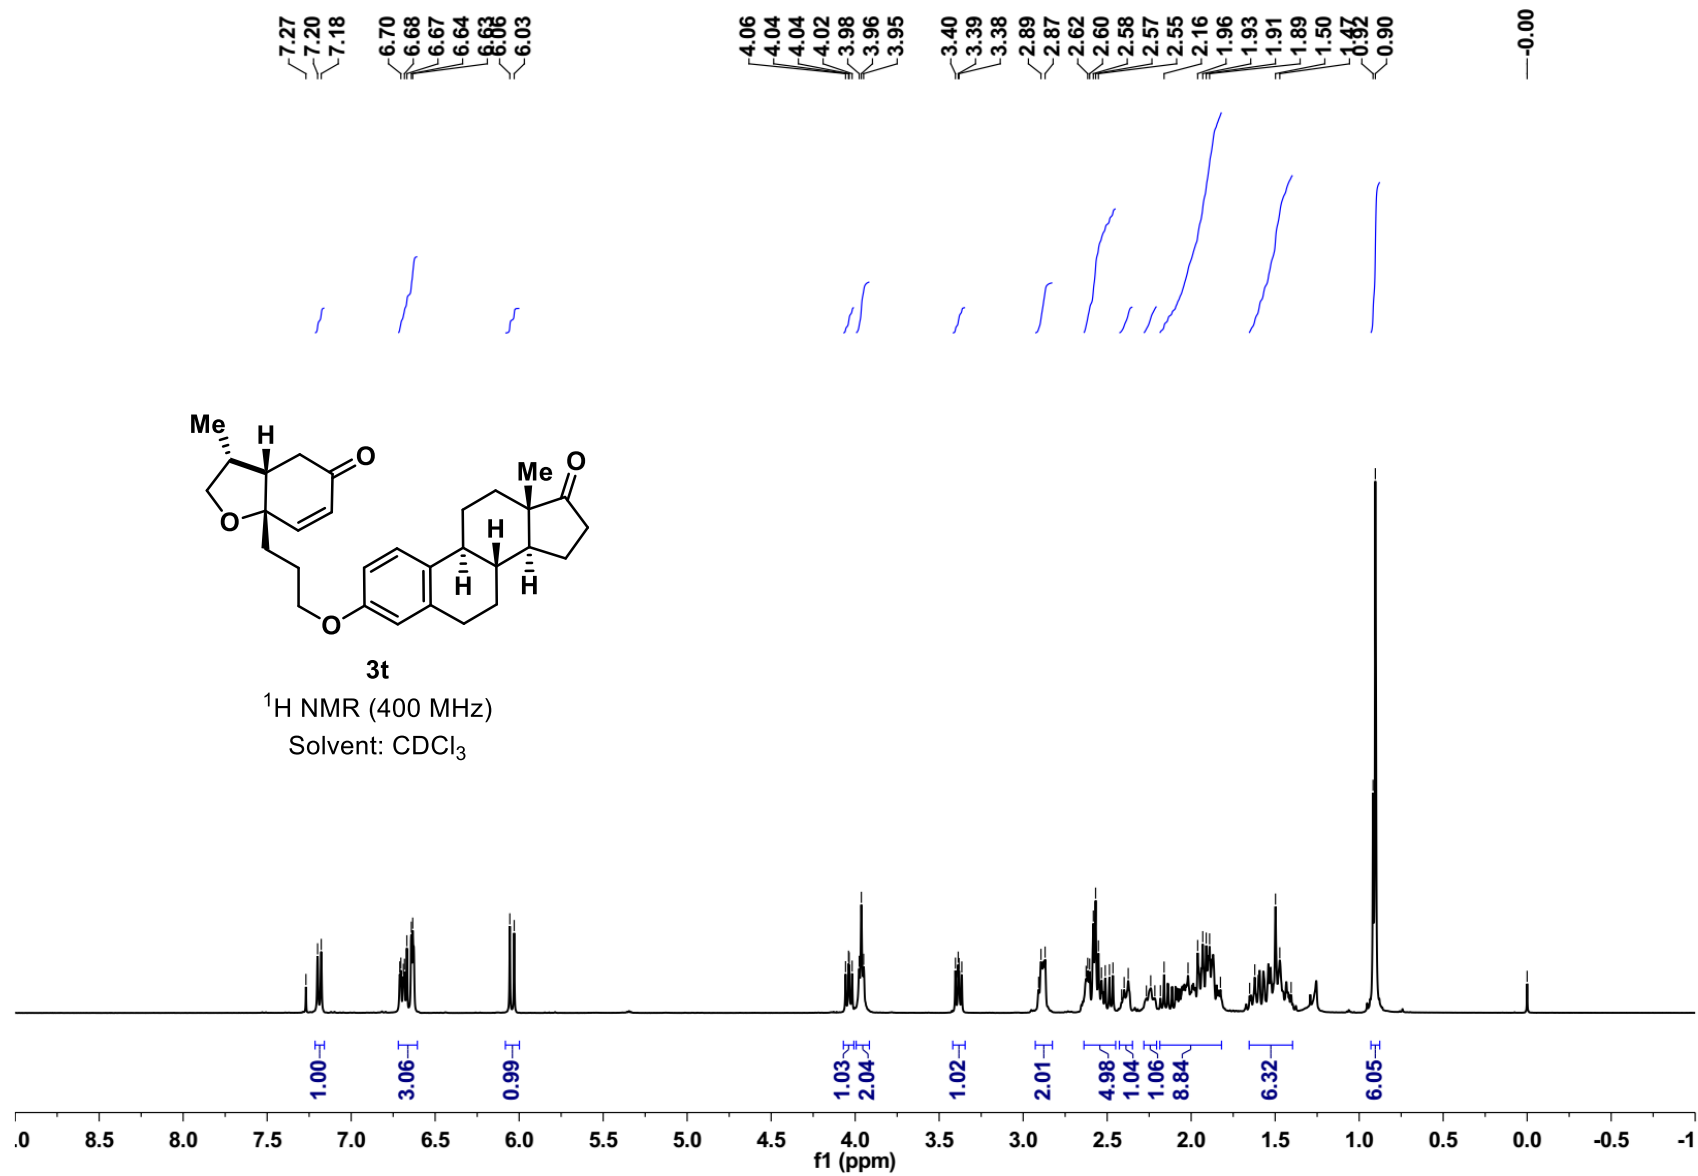

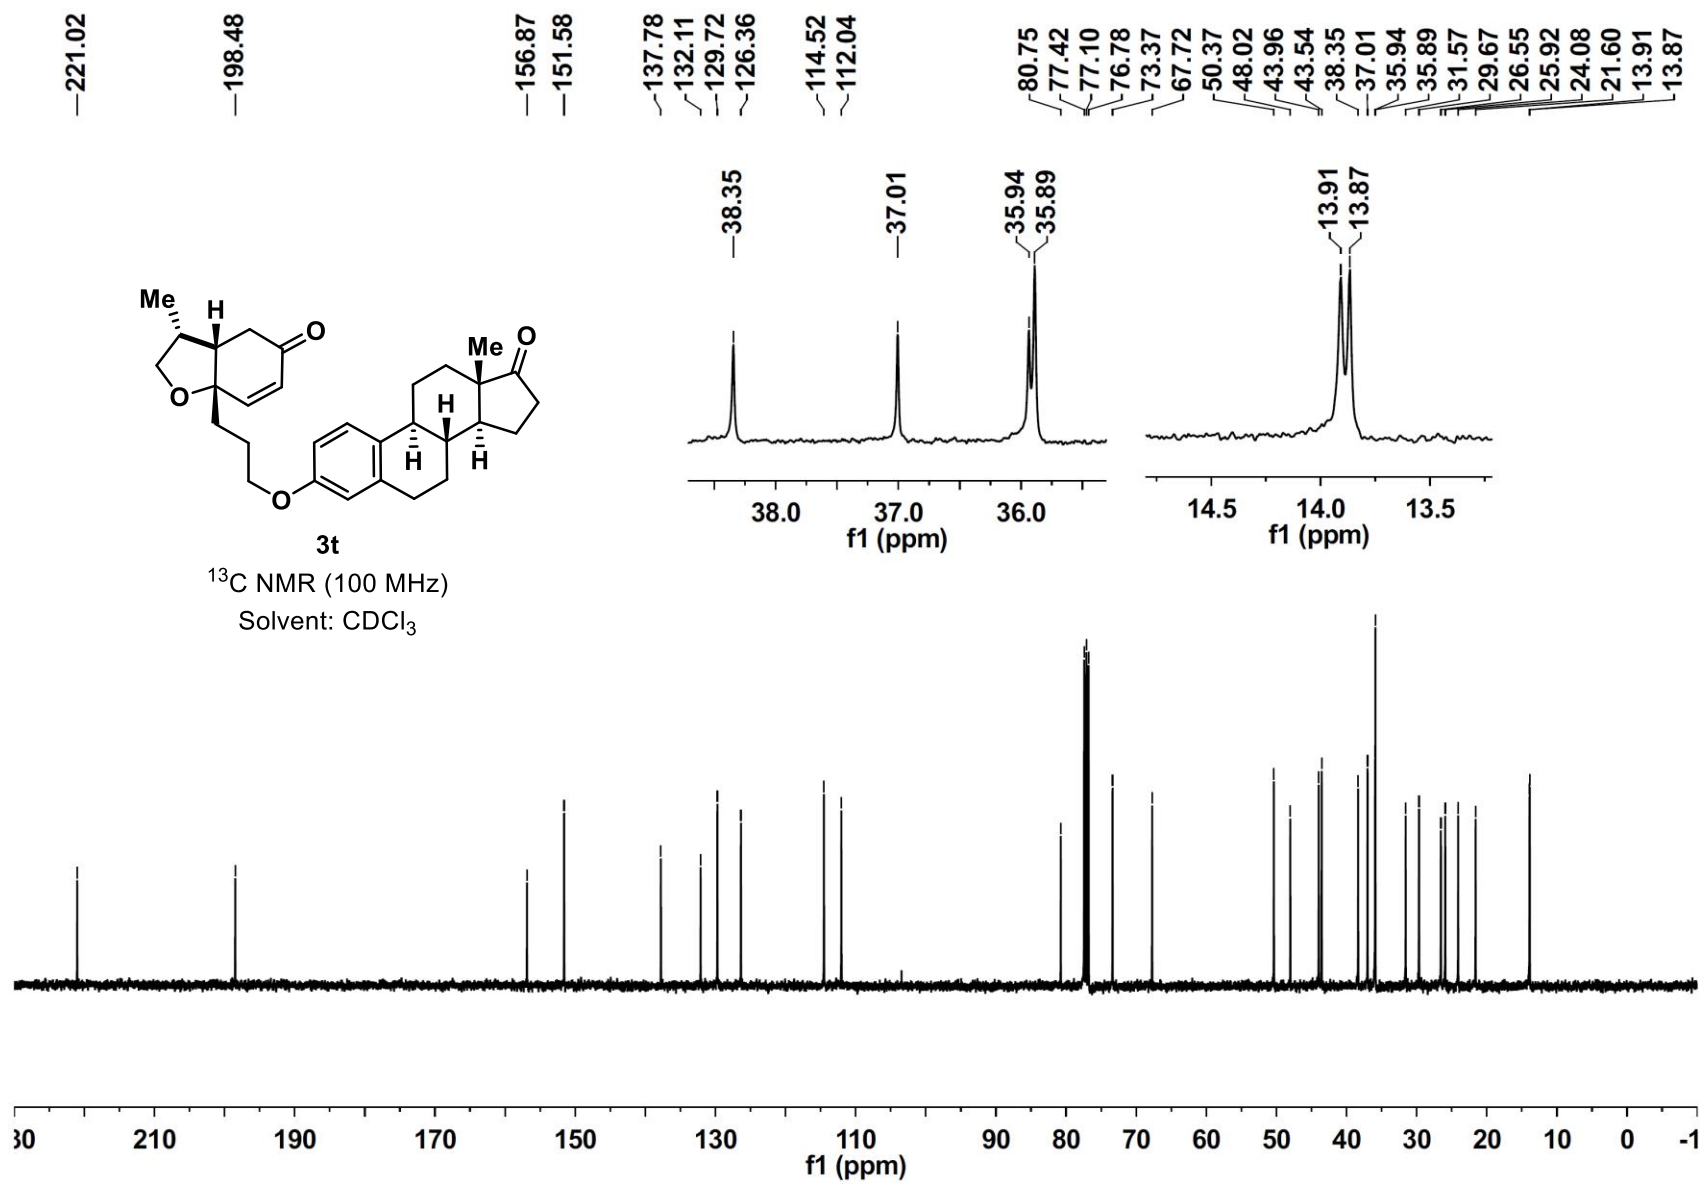

7.27  
7.20  
7.18  
6.67  
6.64  
6.64  
6.63  
6.63  
6.03

4.06  
4.04  
4.04  
4.02  
3.98  
3.96  
3.95

3.40  
3.39  
3.38  
2.89  
2.88  
2.87  
2.60  
2.57  
2.55  
2.47  
2.16  
2.02  
1.93  
1.91  
1.89  
1.50  
0.92  
0.90

0.00

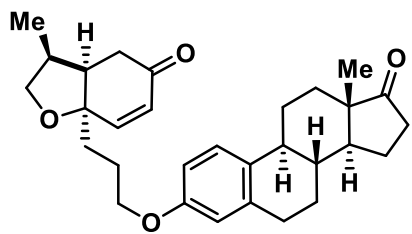

3t'

<sup>1</sup>H NMR (400 MHz)  
Solvent: CDCl<sub>3</sub>

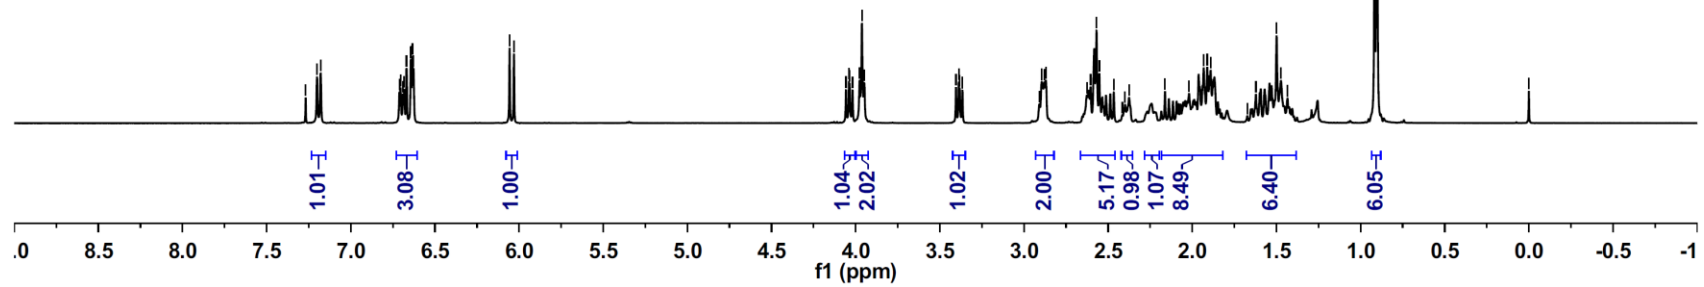

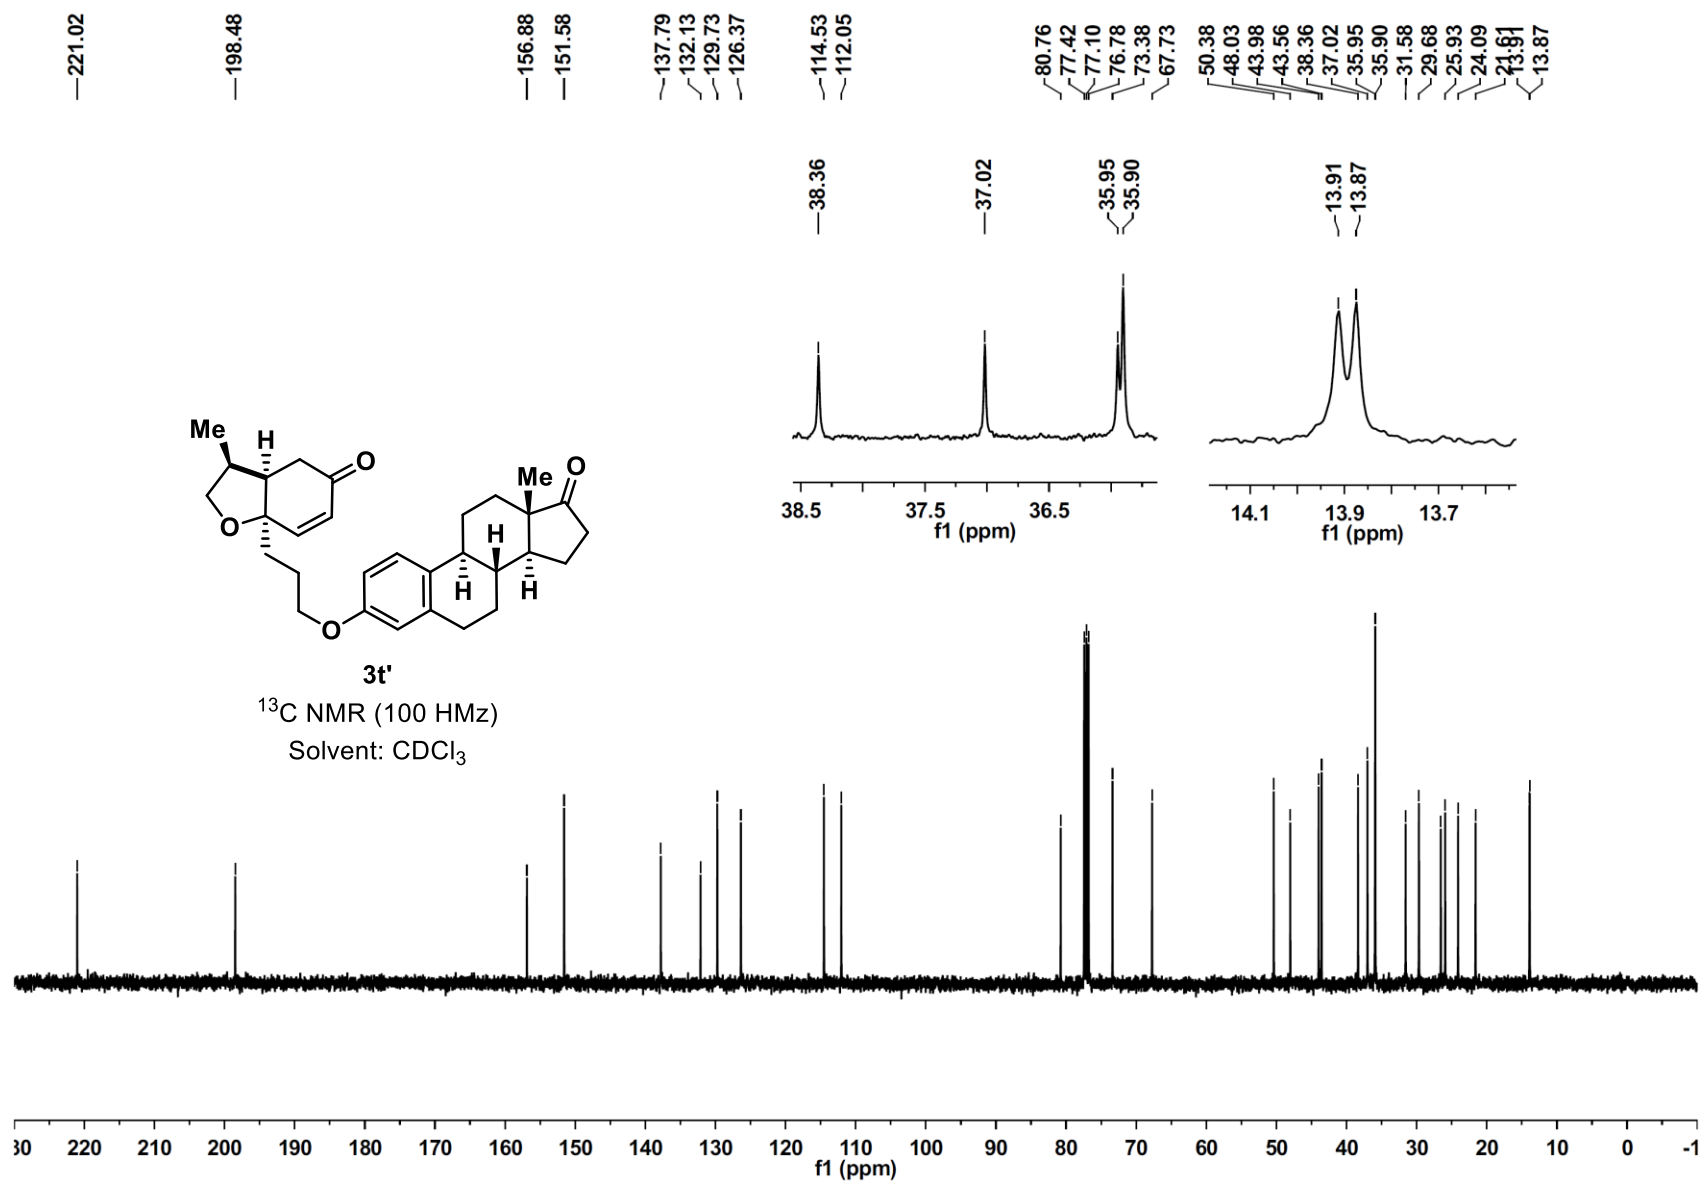



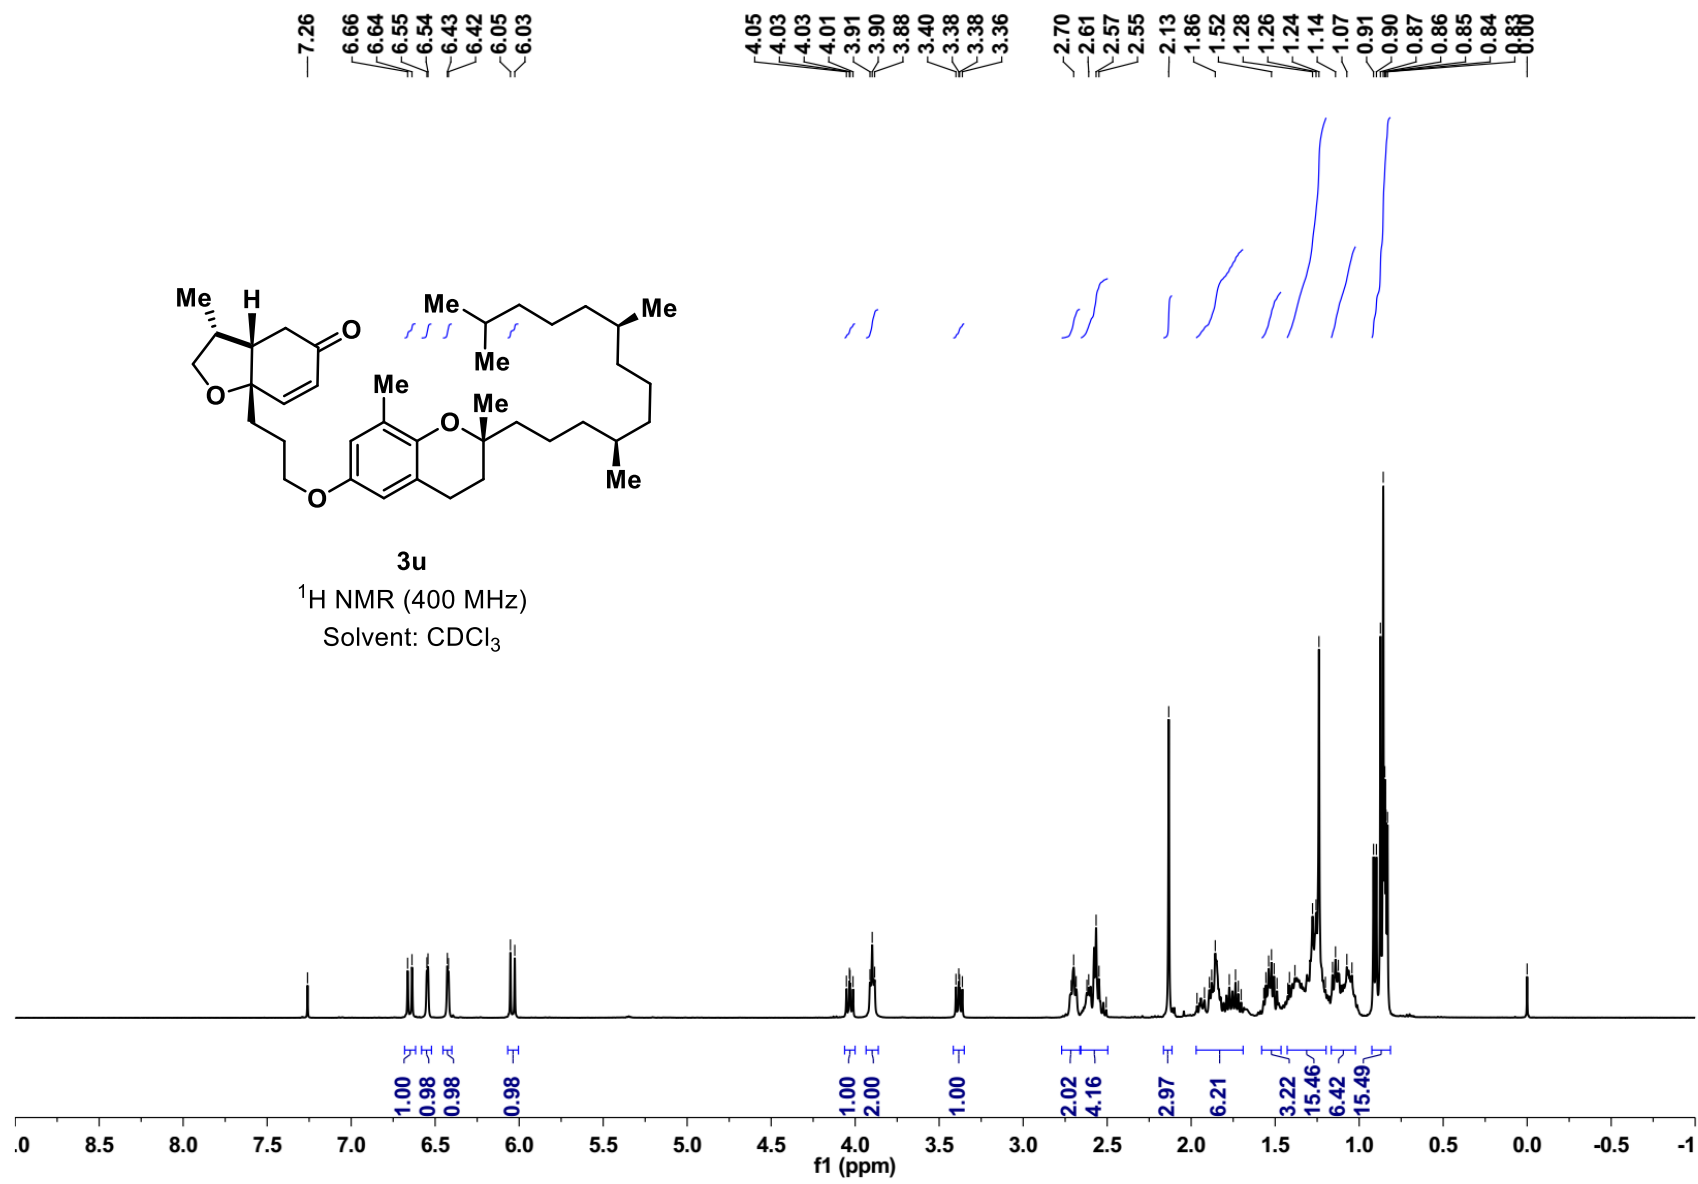

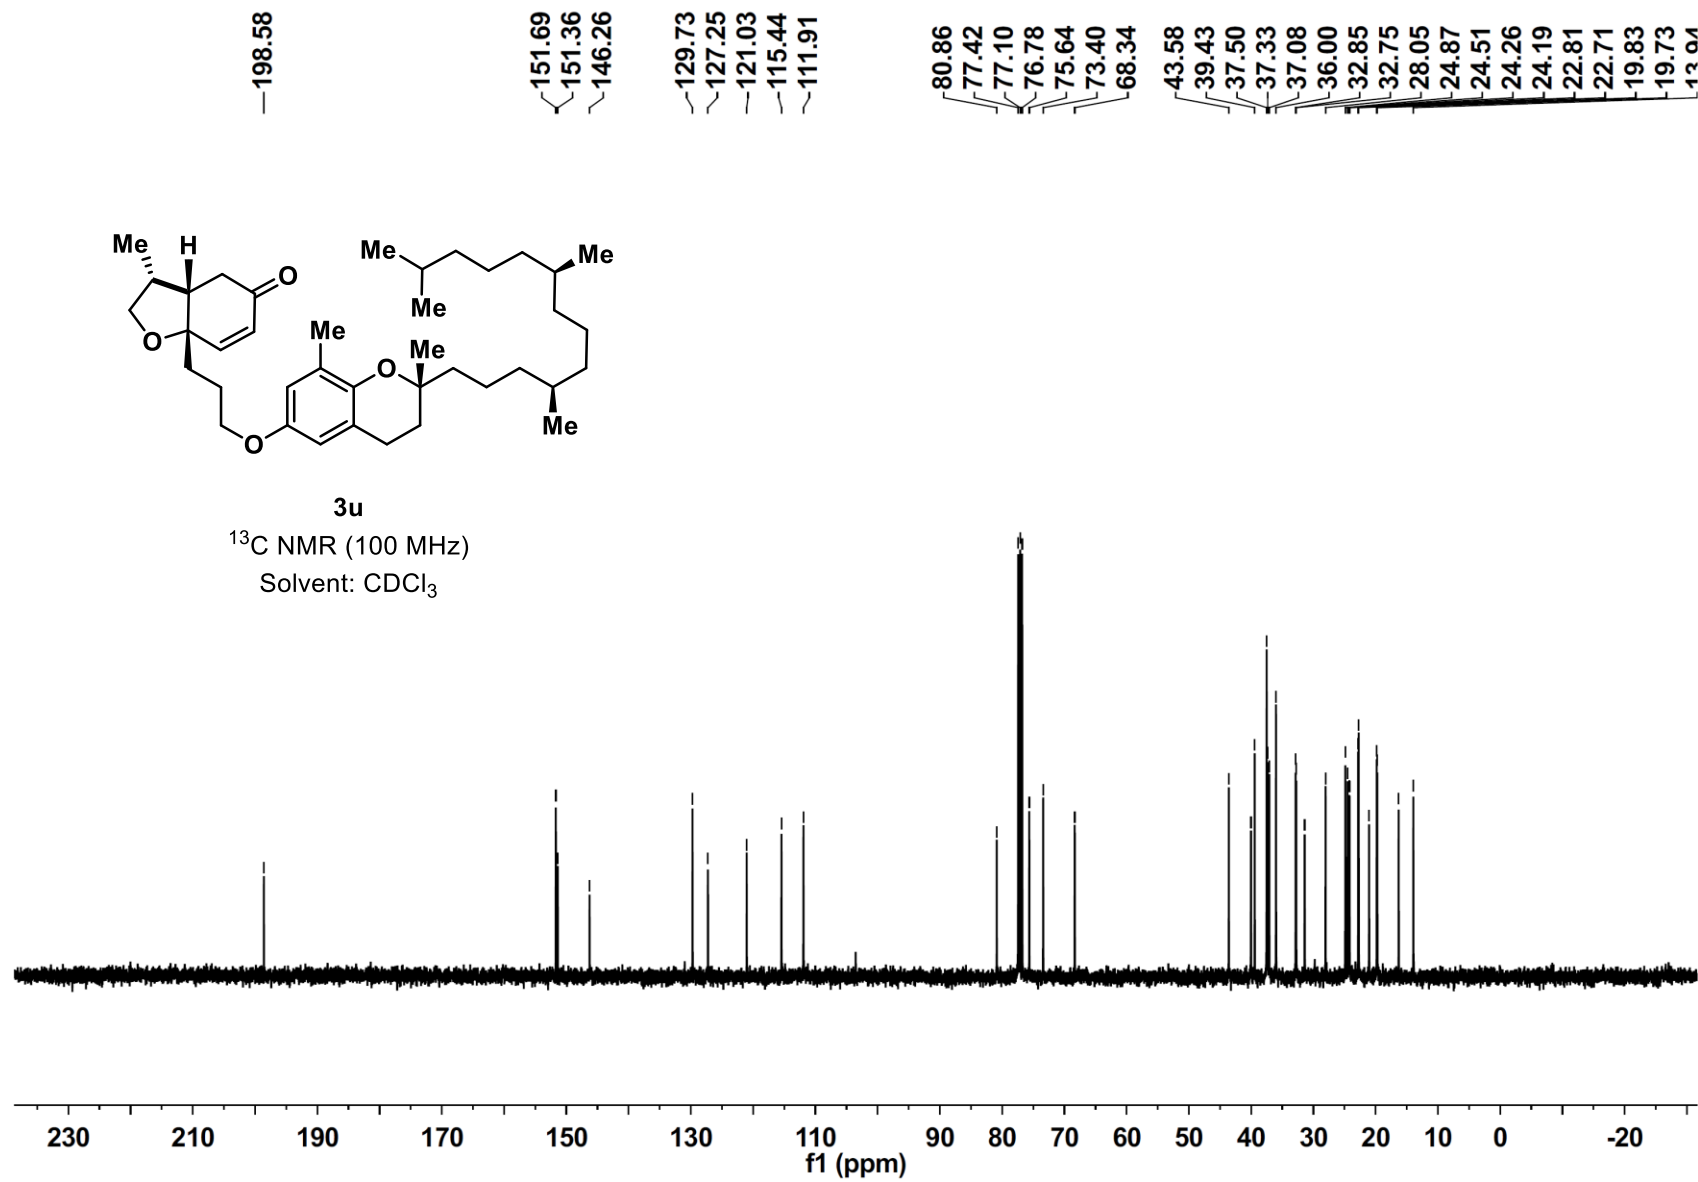

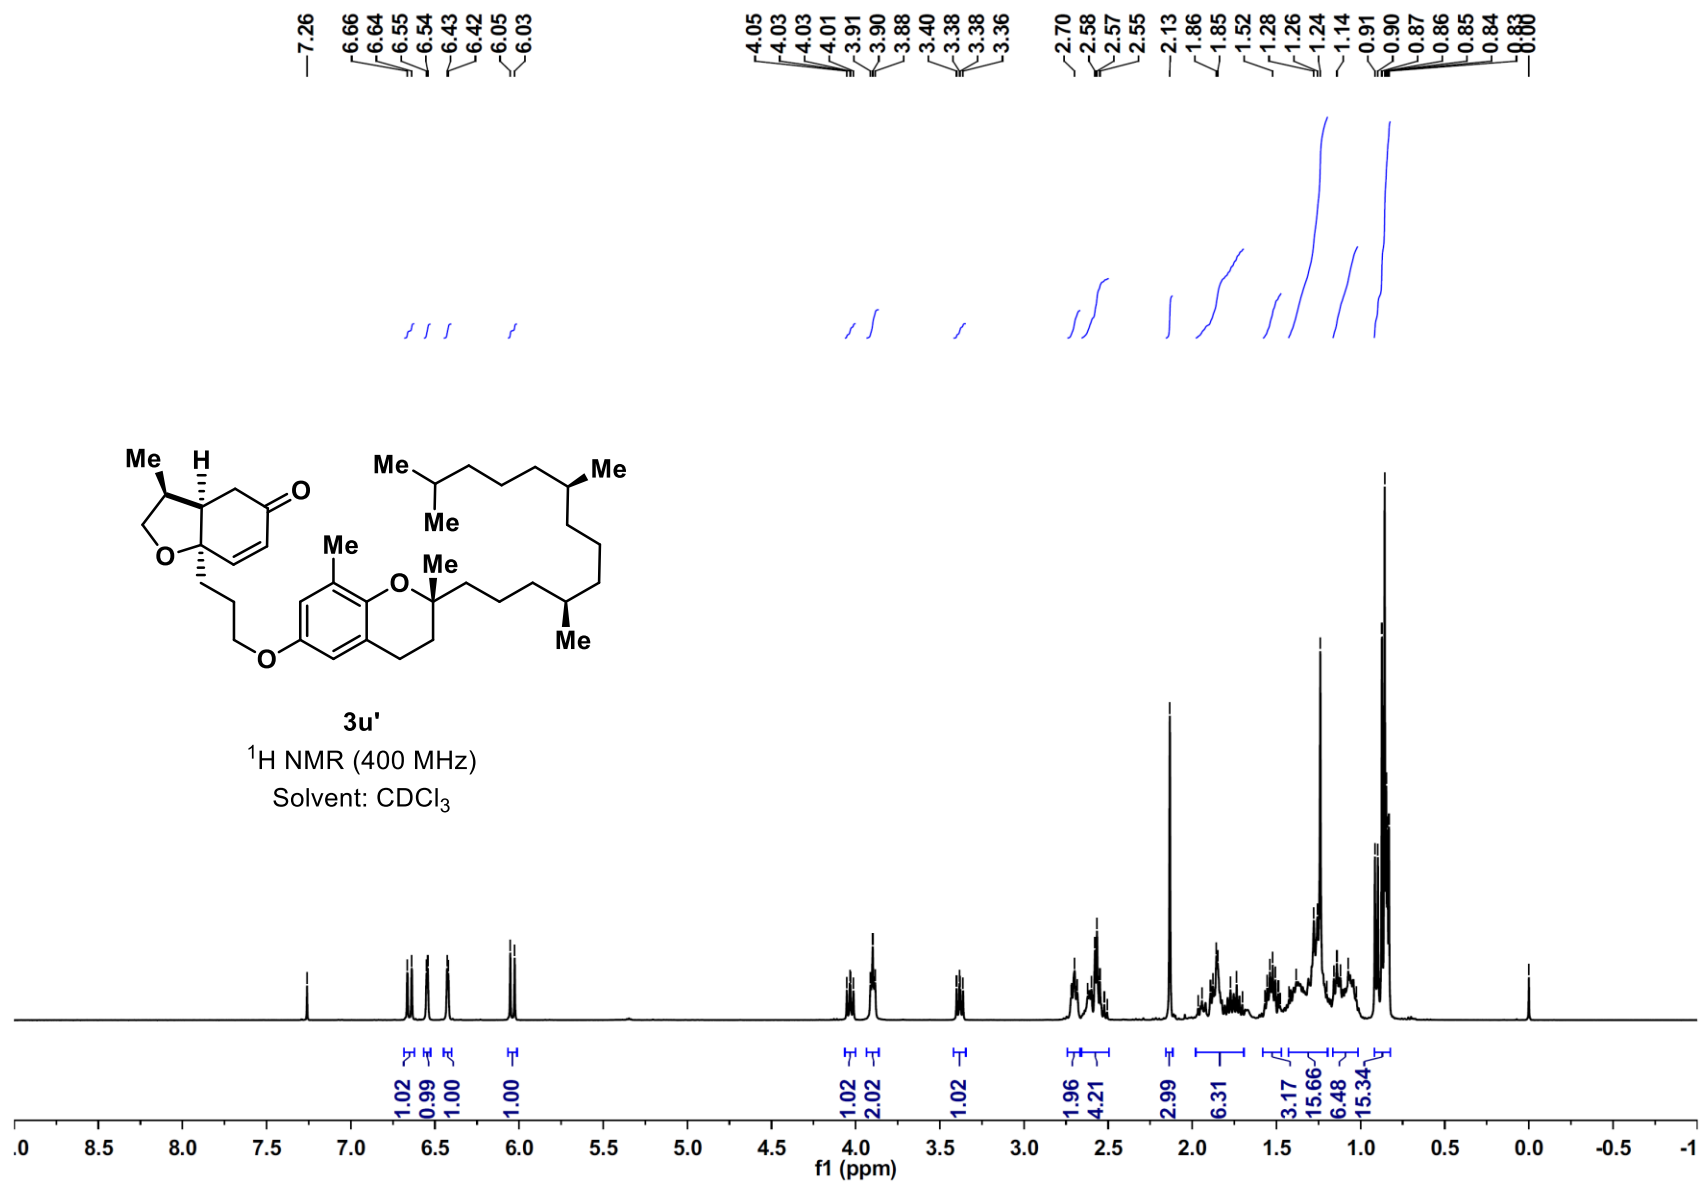

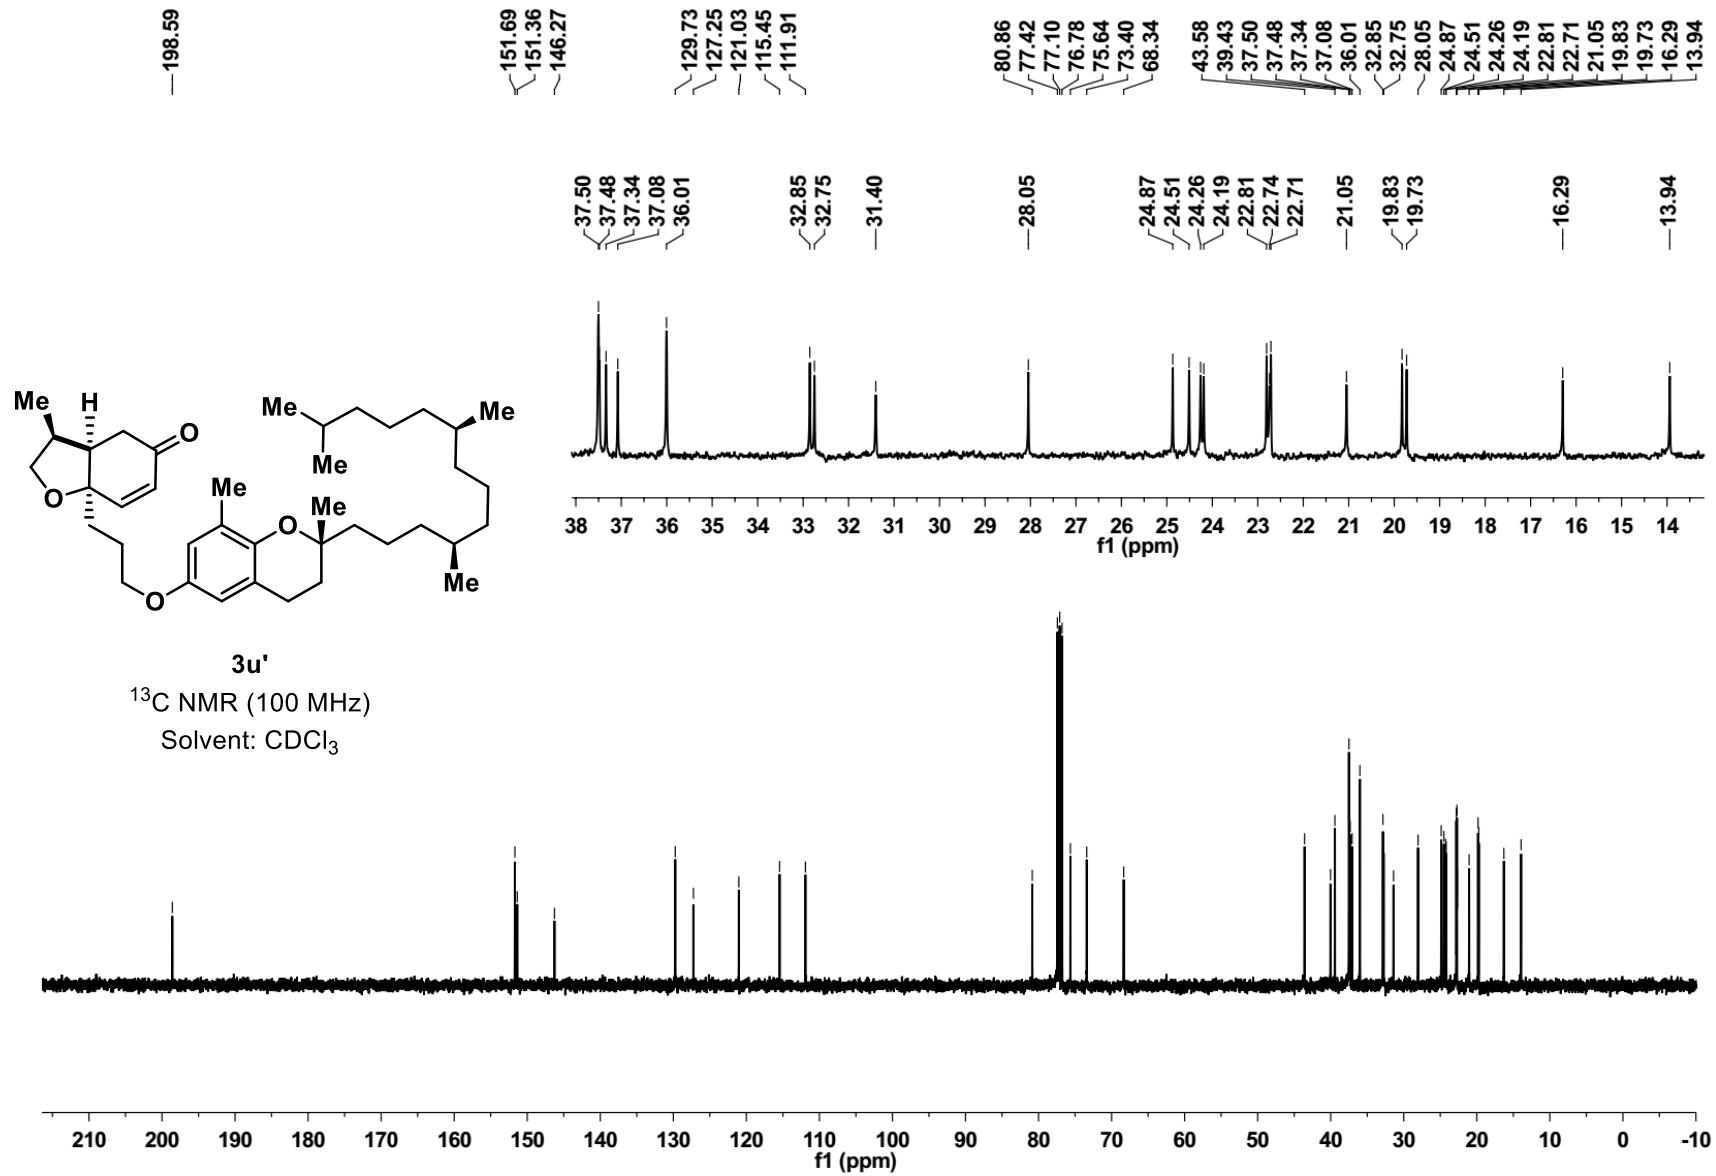

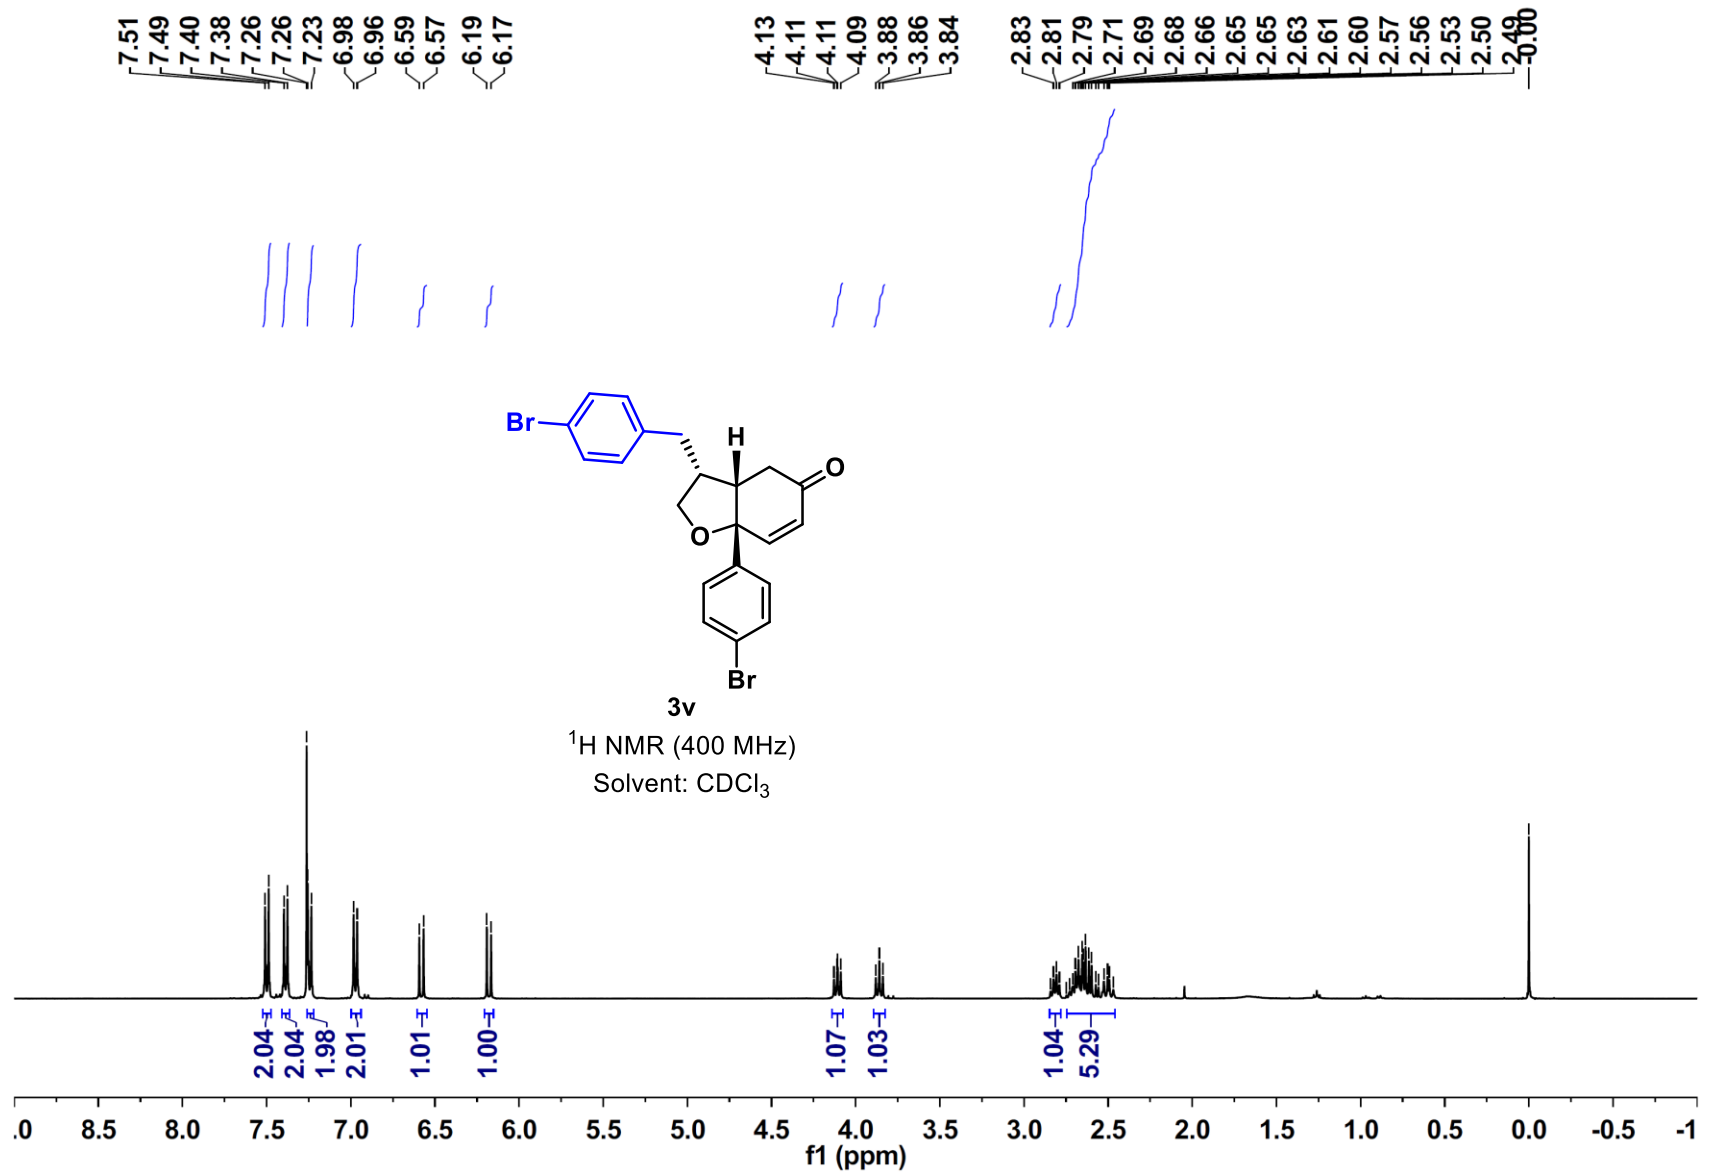

—198.20

148.31  
142.81  
138.46  
131.92  
131.87  
130.15  
129.22  
126.88  
122.00  
120.39

82.73  
77.42  
77.10  
76.78  
72.29

47.48  
43.30  
35.47  
33.44

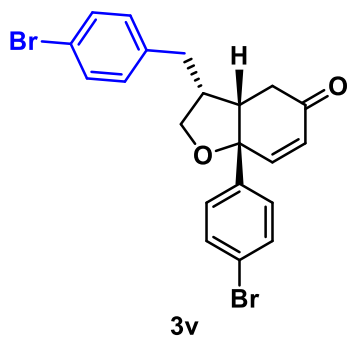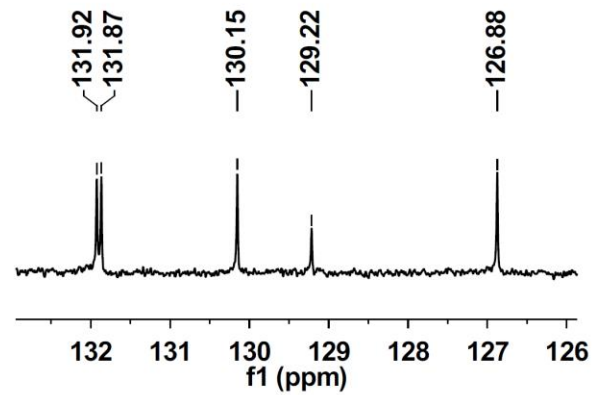

<sup>13</sup>C NMR (400 MHz)  
Solvent: CDCl<sub>3</sub>

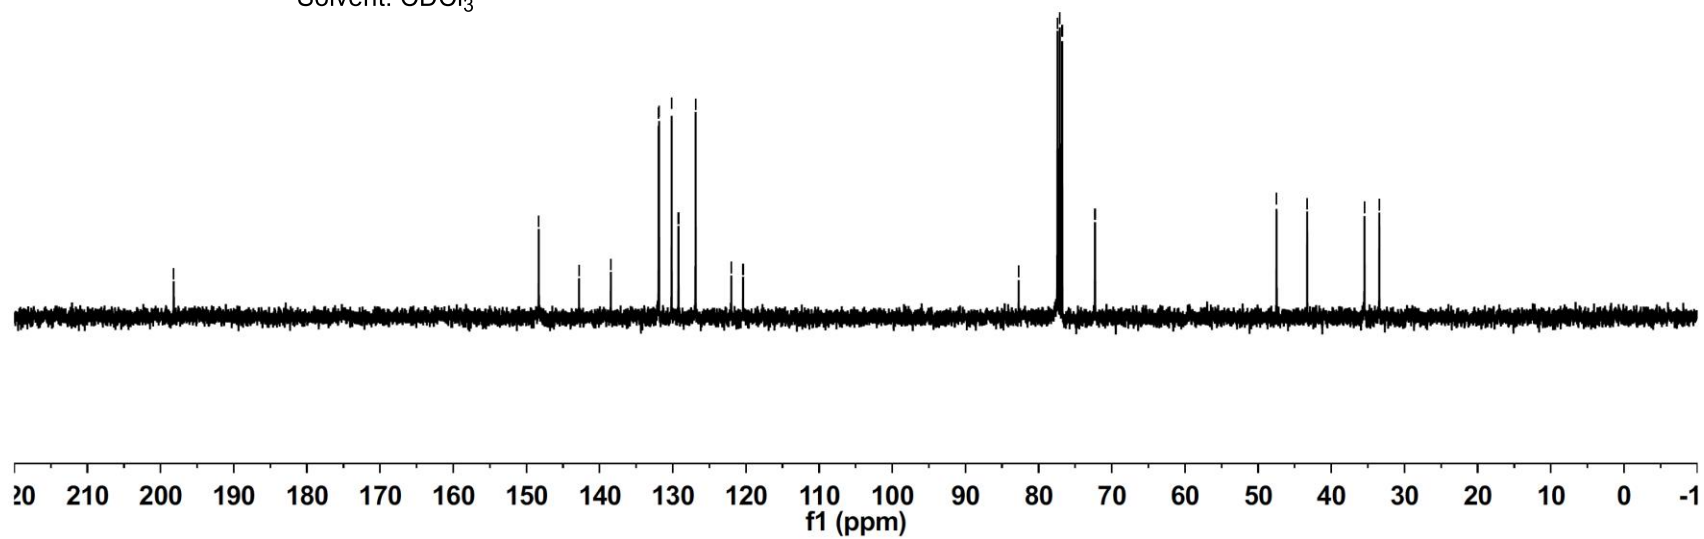

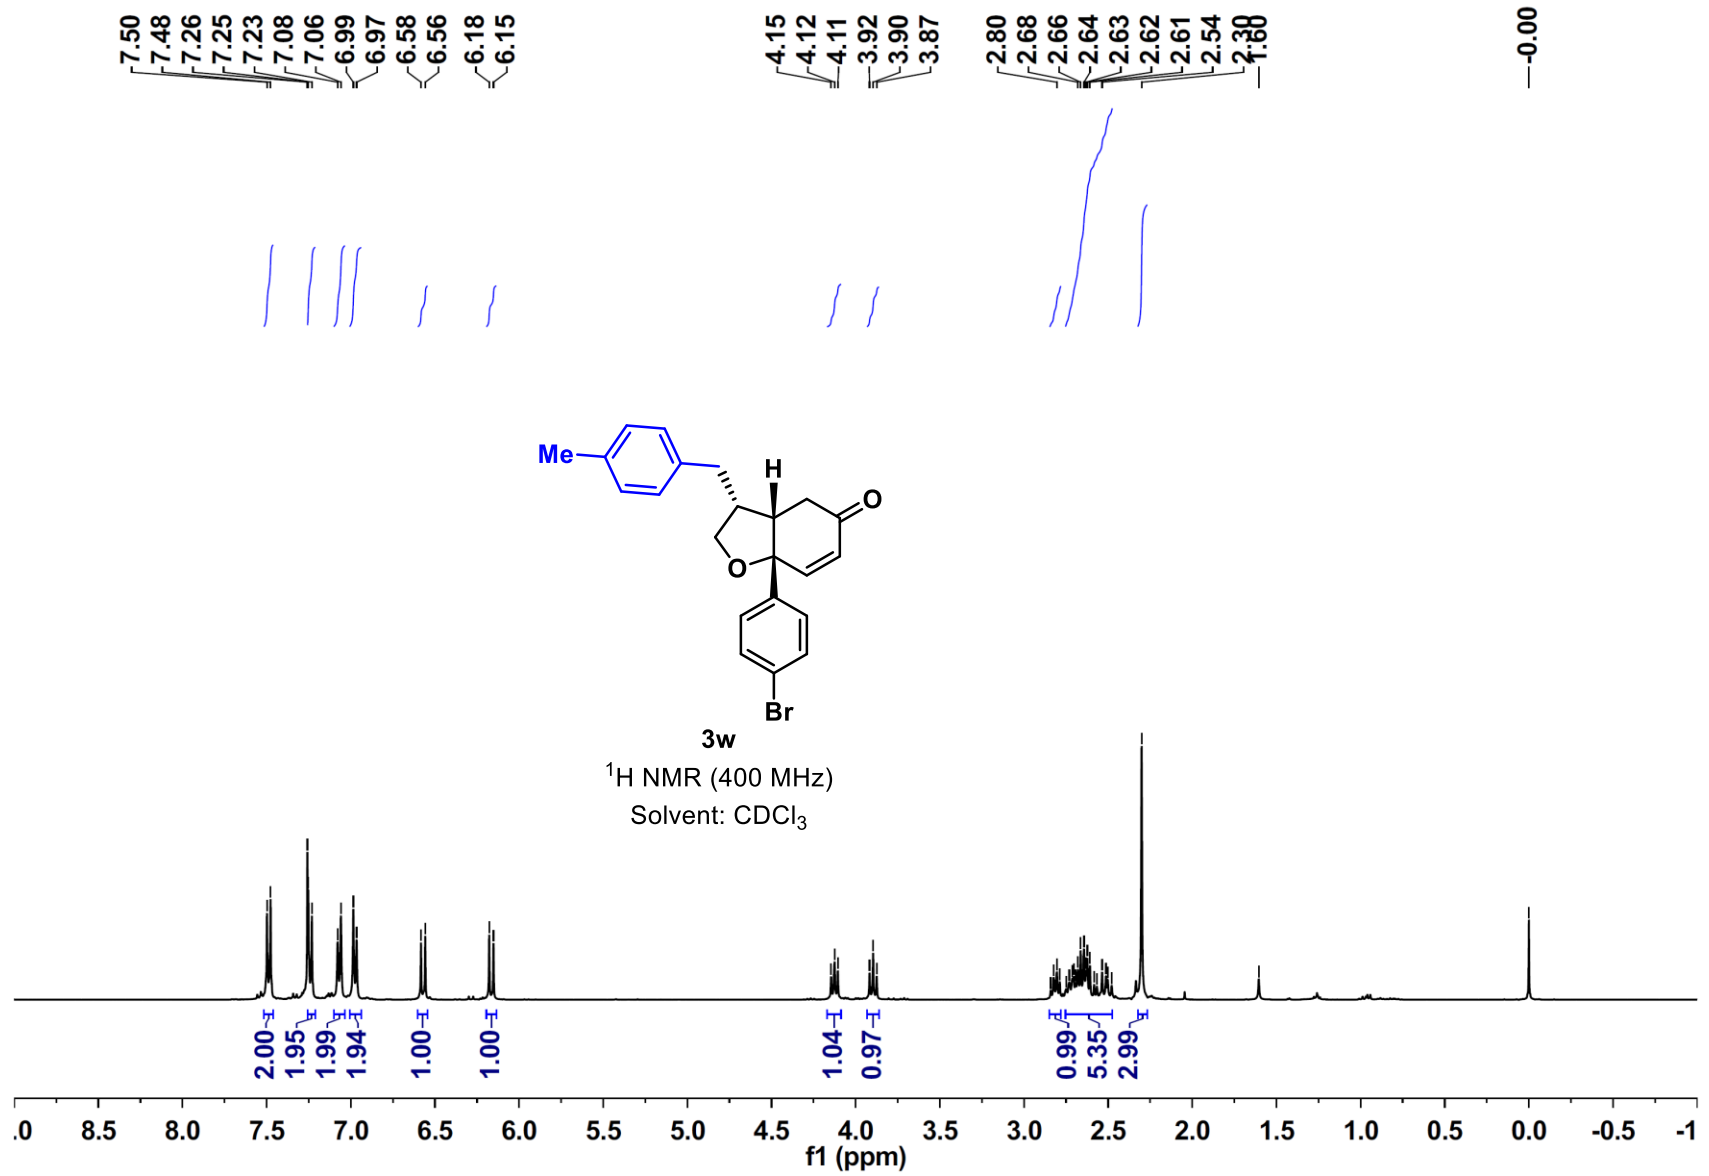

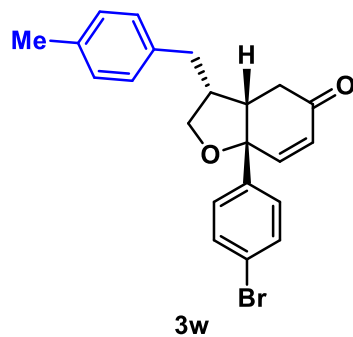

$^{13}\text{C}$  NMR (100 MHz)  
Solvent:  $\text{CDCl}_3$

—198.53

148.27  
143.09  
136.37  
136.05  
131.83  
129.40  
129.13  
128.29  
126.94  
121.86

82.72  
77.42  
77.10  
76.78  
72.57

47.48  
43.37  
35.47  
33.46

—21.05

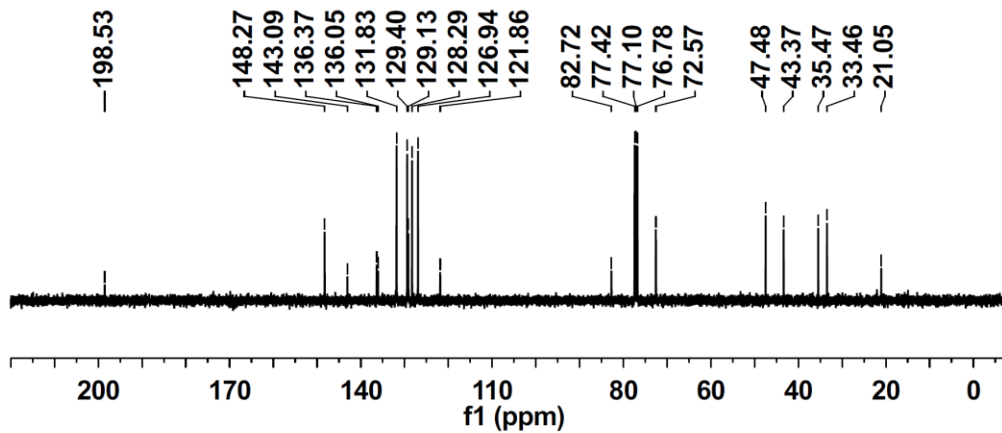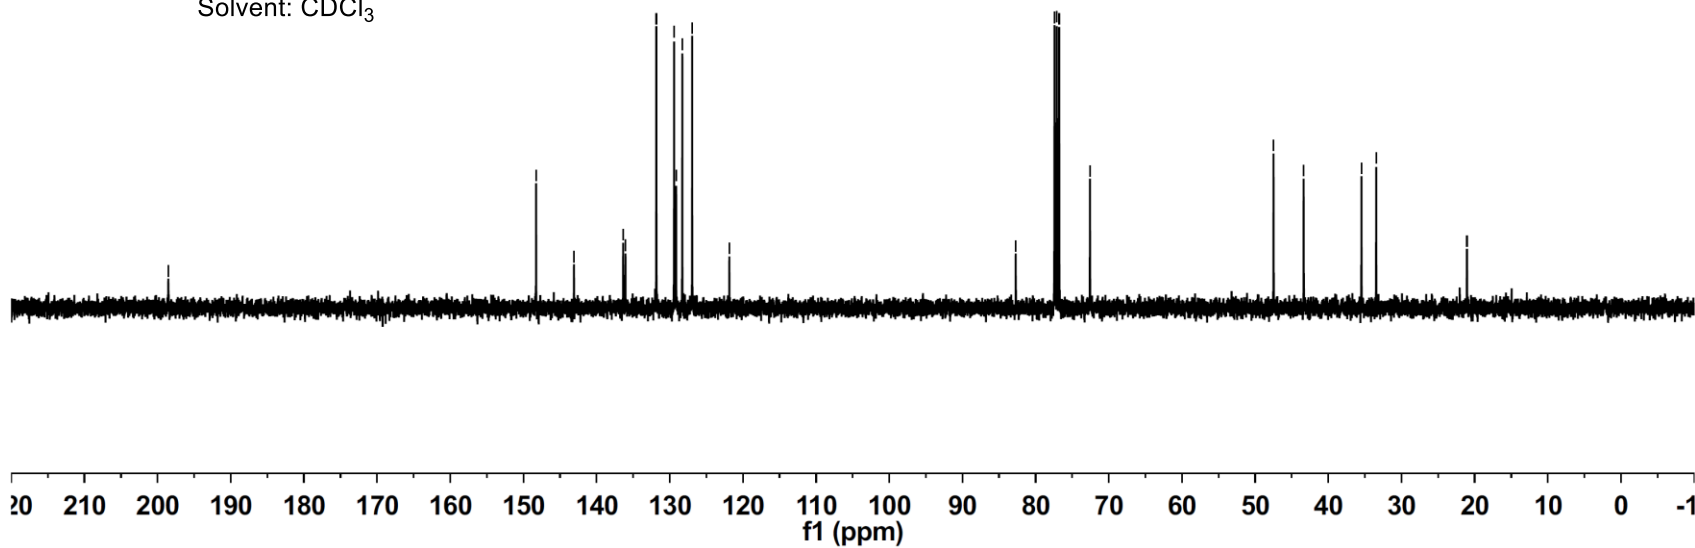



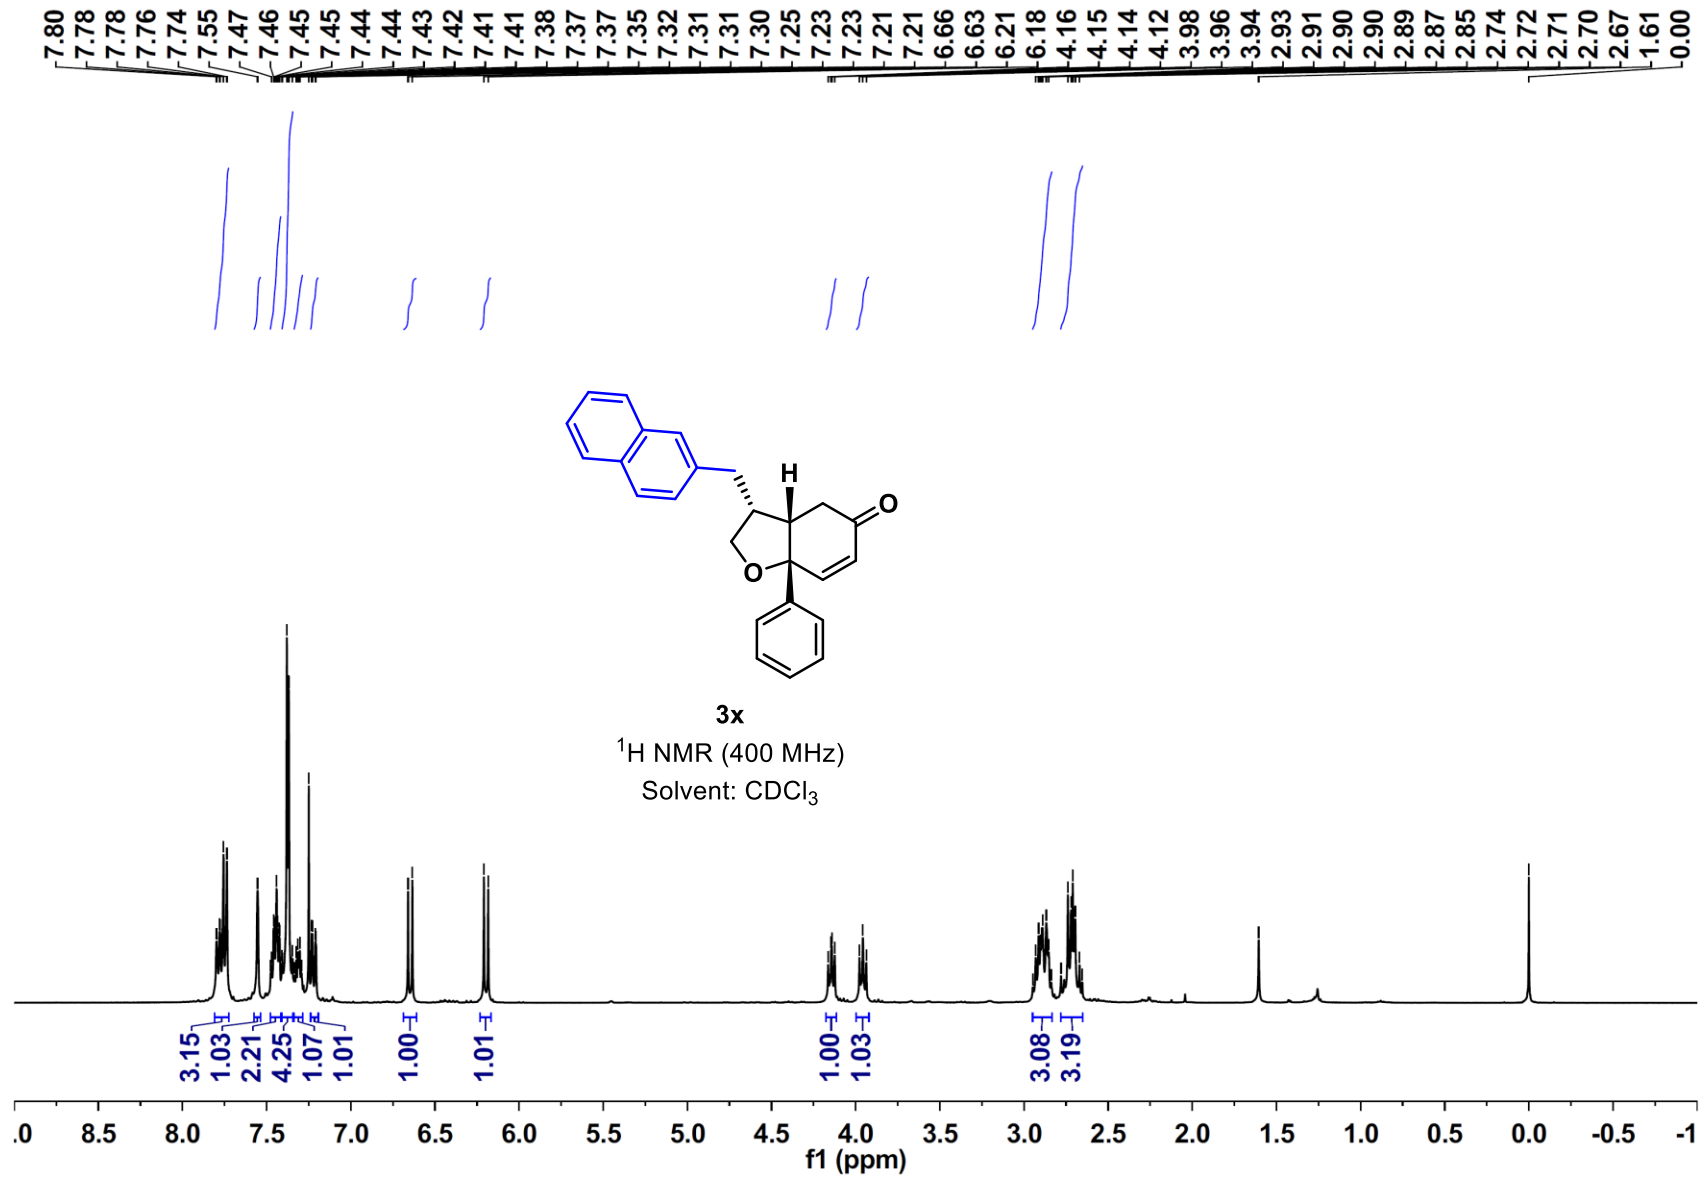

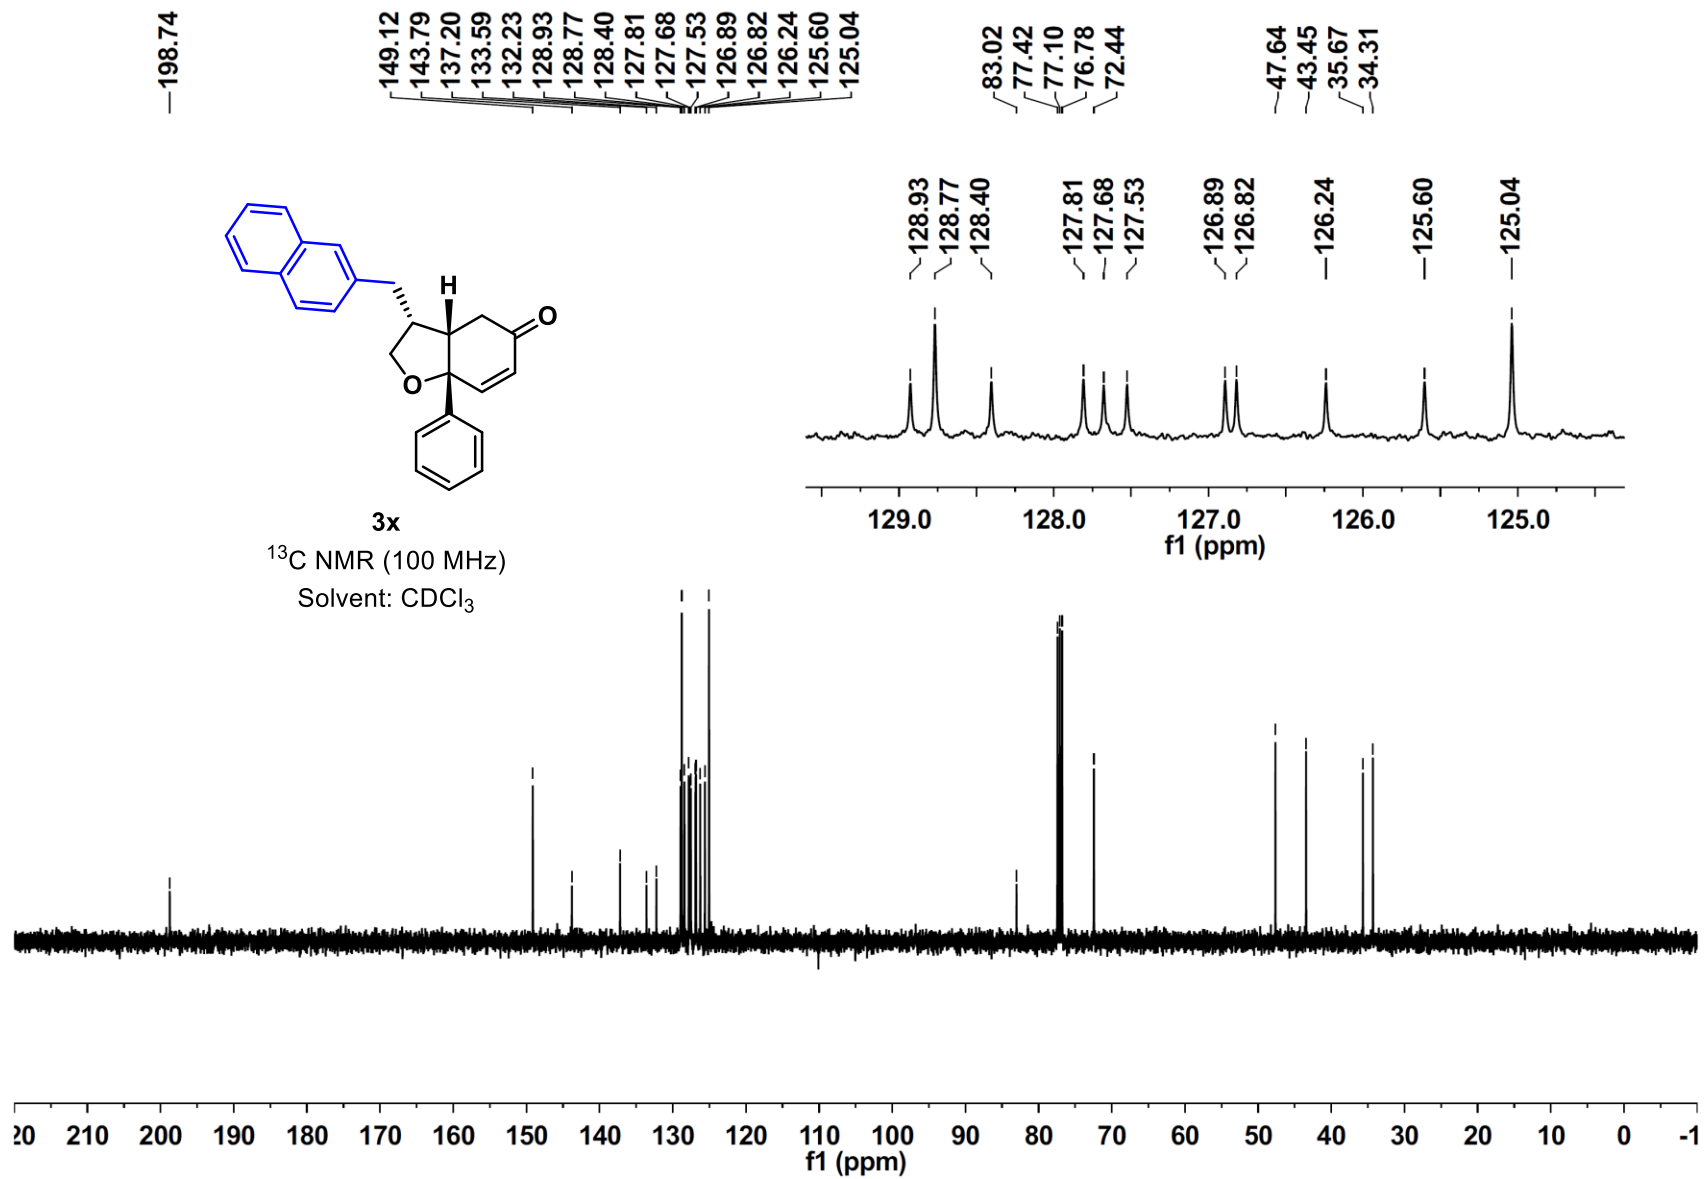

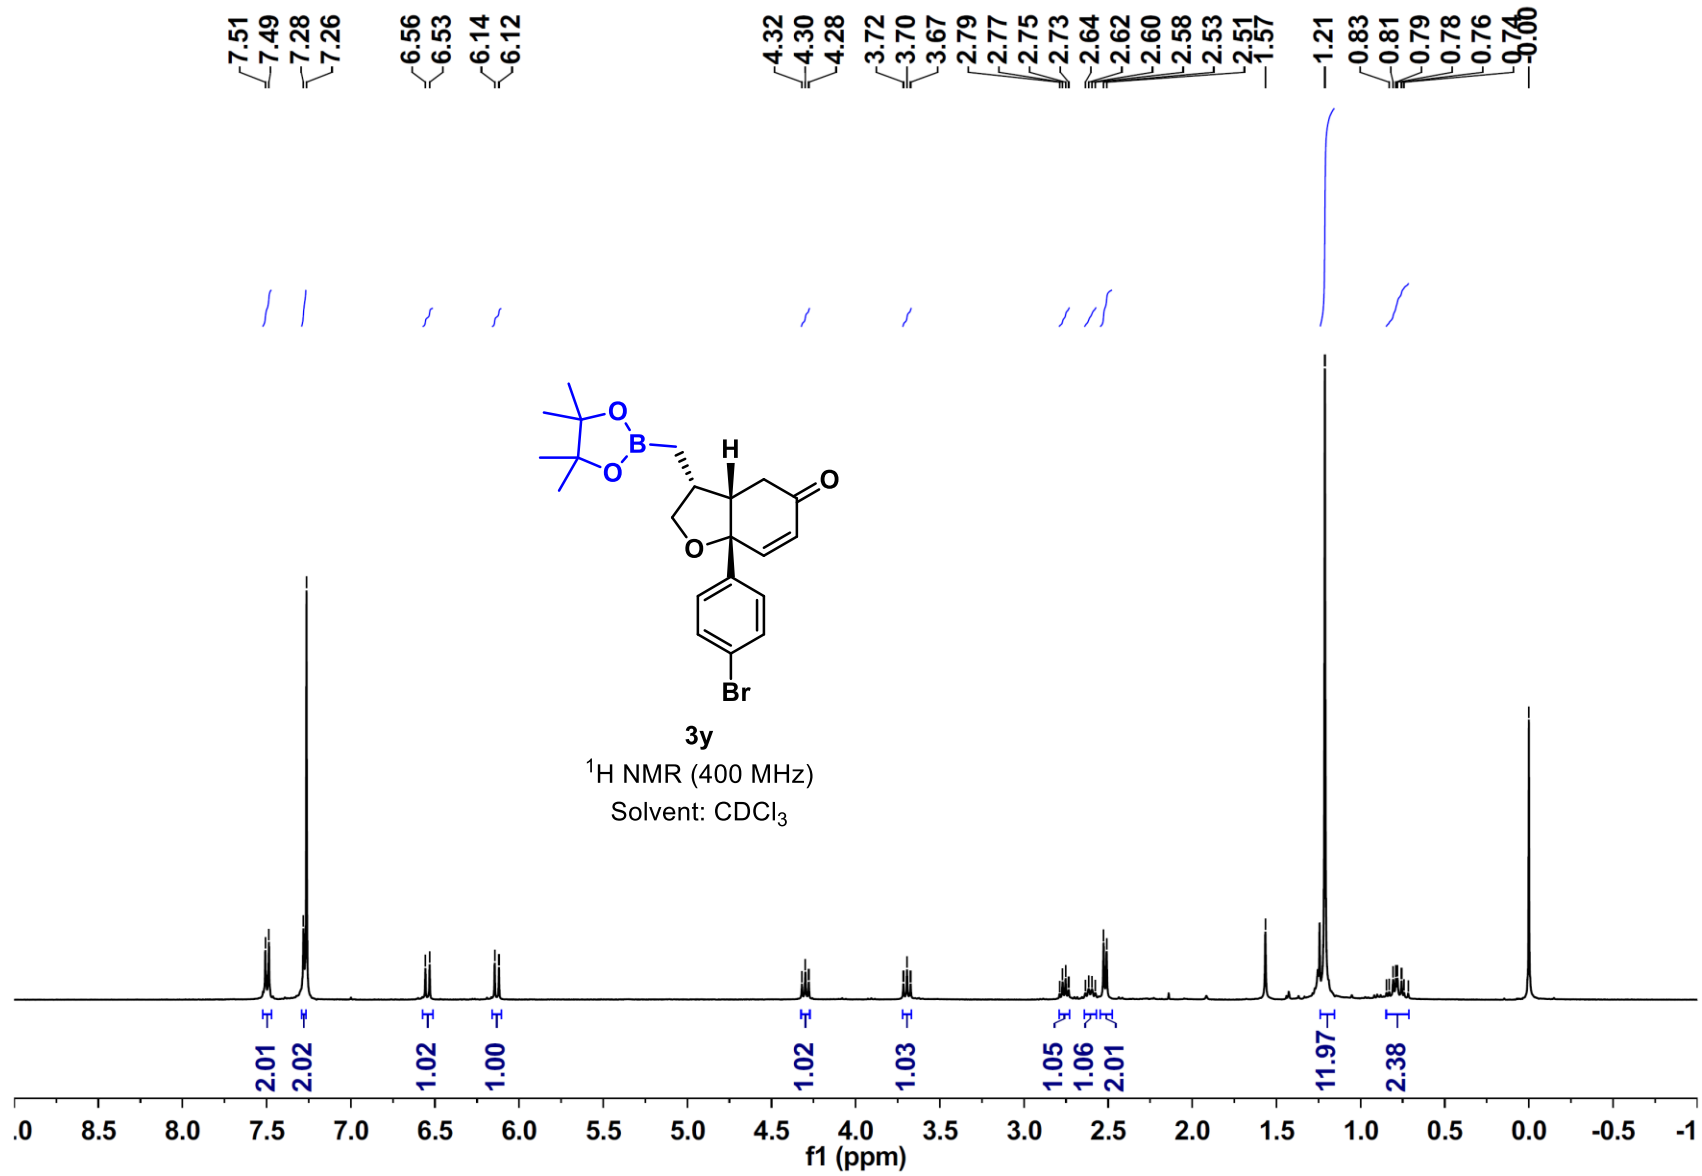

—198.83

—148.40  
—143.26

~131.73  
~129.30  
~126.97  
~121.68

83.49  
82.51  
77.42  
77.10  
76.78  
74.30

—48.30

~37.64  
~35.39

24.88  
24.76

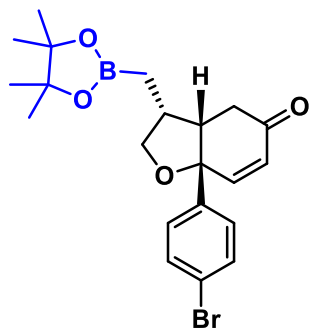

**3y**

<sup>13</sup>C NMR (100 MHz)  
Solvent: CDCl<sub>3</sub>

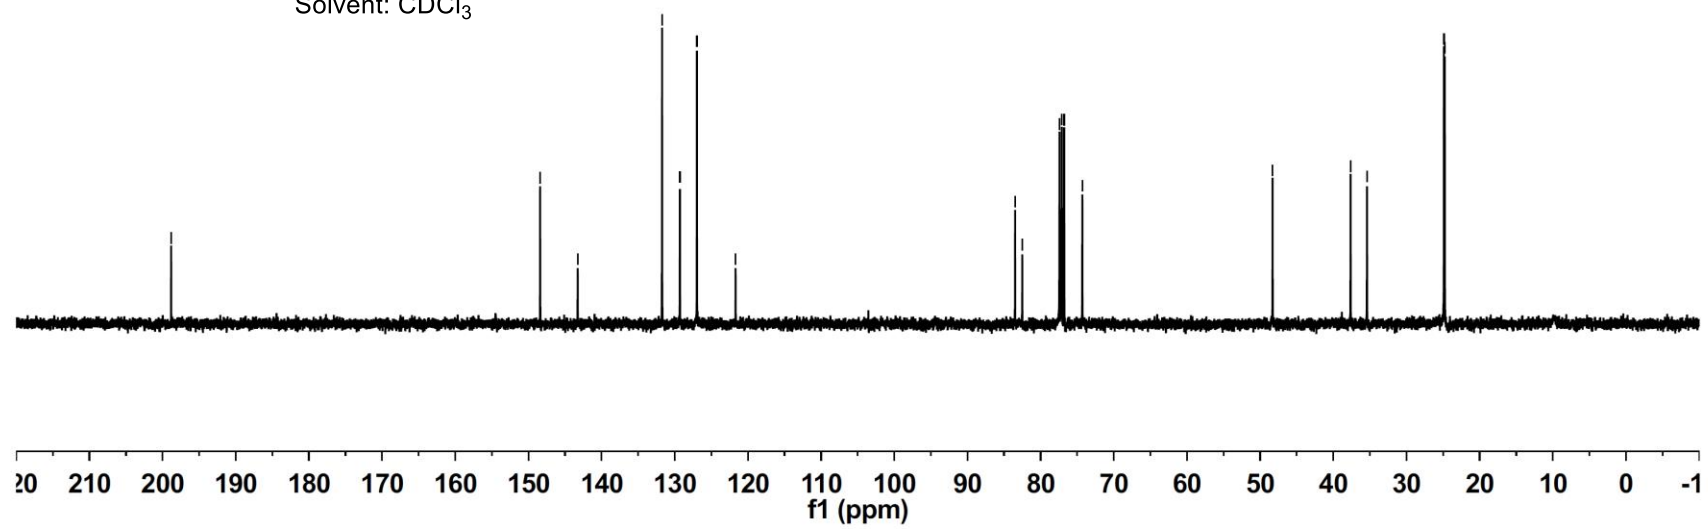

7.96  
7.96  
7.94  
7.94  
7.68  
7.66  
7.63  
7.63  
7.62  
7.61  
7.60  
7.59  
7.39  
7.39  
7.37  
7.36  
7.35  
7.27

4.15  
4.13  
4.11  
3.14  
3.13  
3.12  
3.10  
2.89  
2.86  
2.85  
2.84  
2.83  
2.69  
2.67  
2.65  
2.64  
1.70  
1.64

0.75  
0.73  
0.00

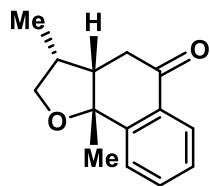

(+)-3y

<sup>1</sup>H NMR (400 MHz)

Solvent: CDCl<sub>3</sub>

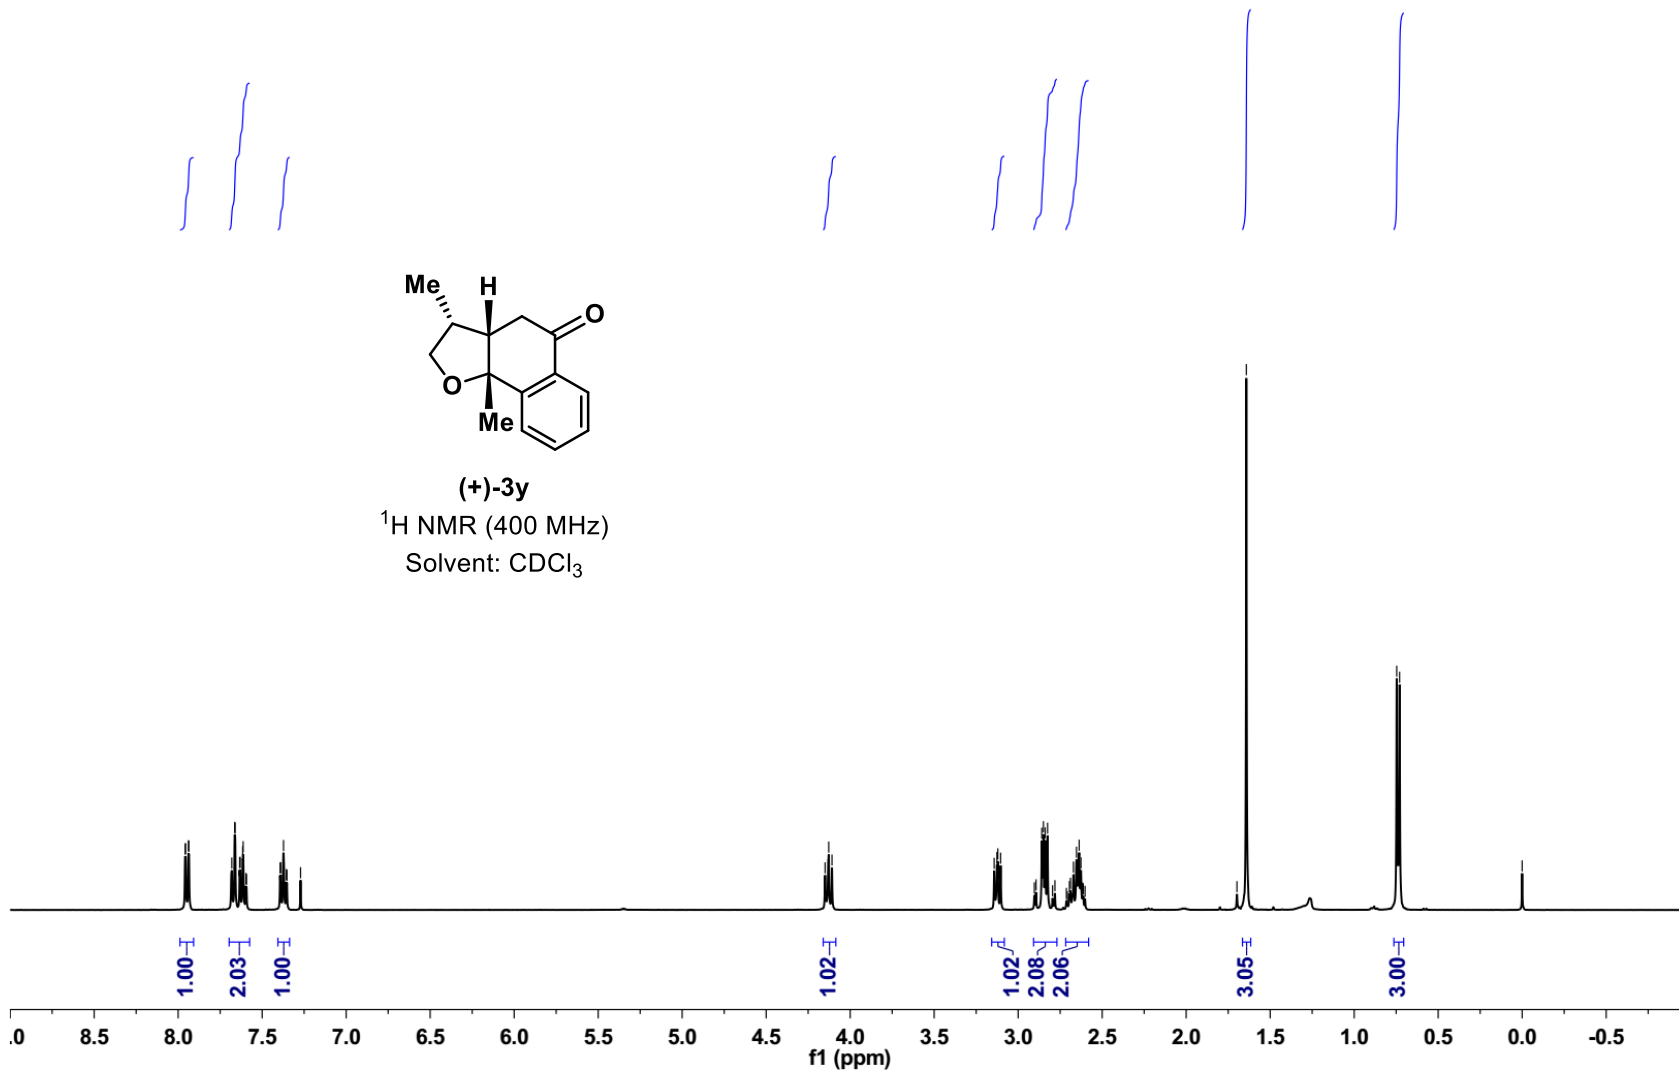

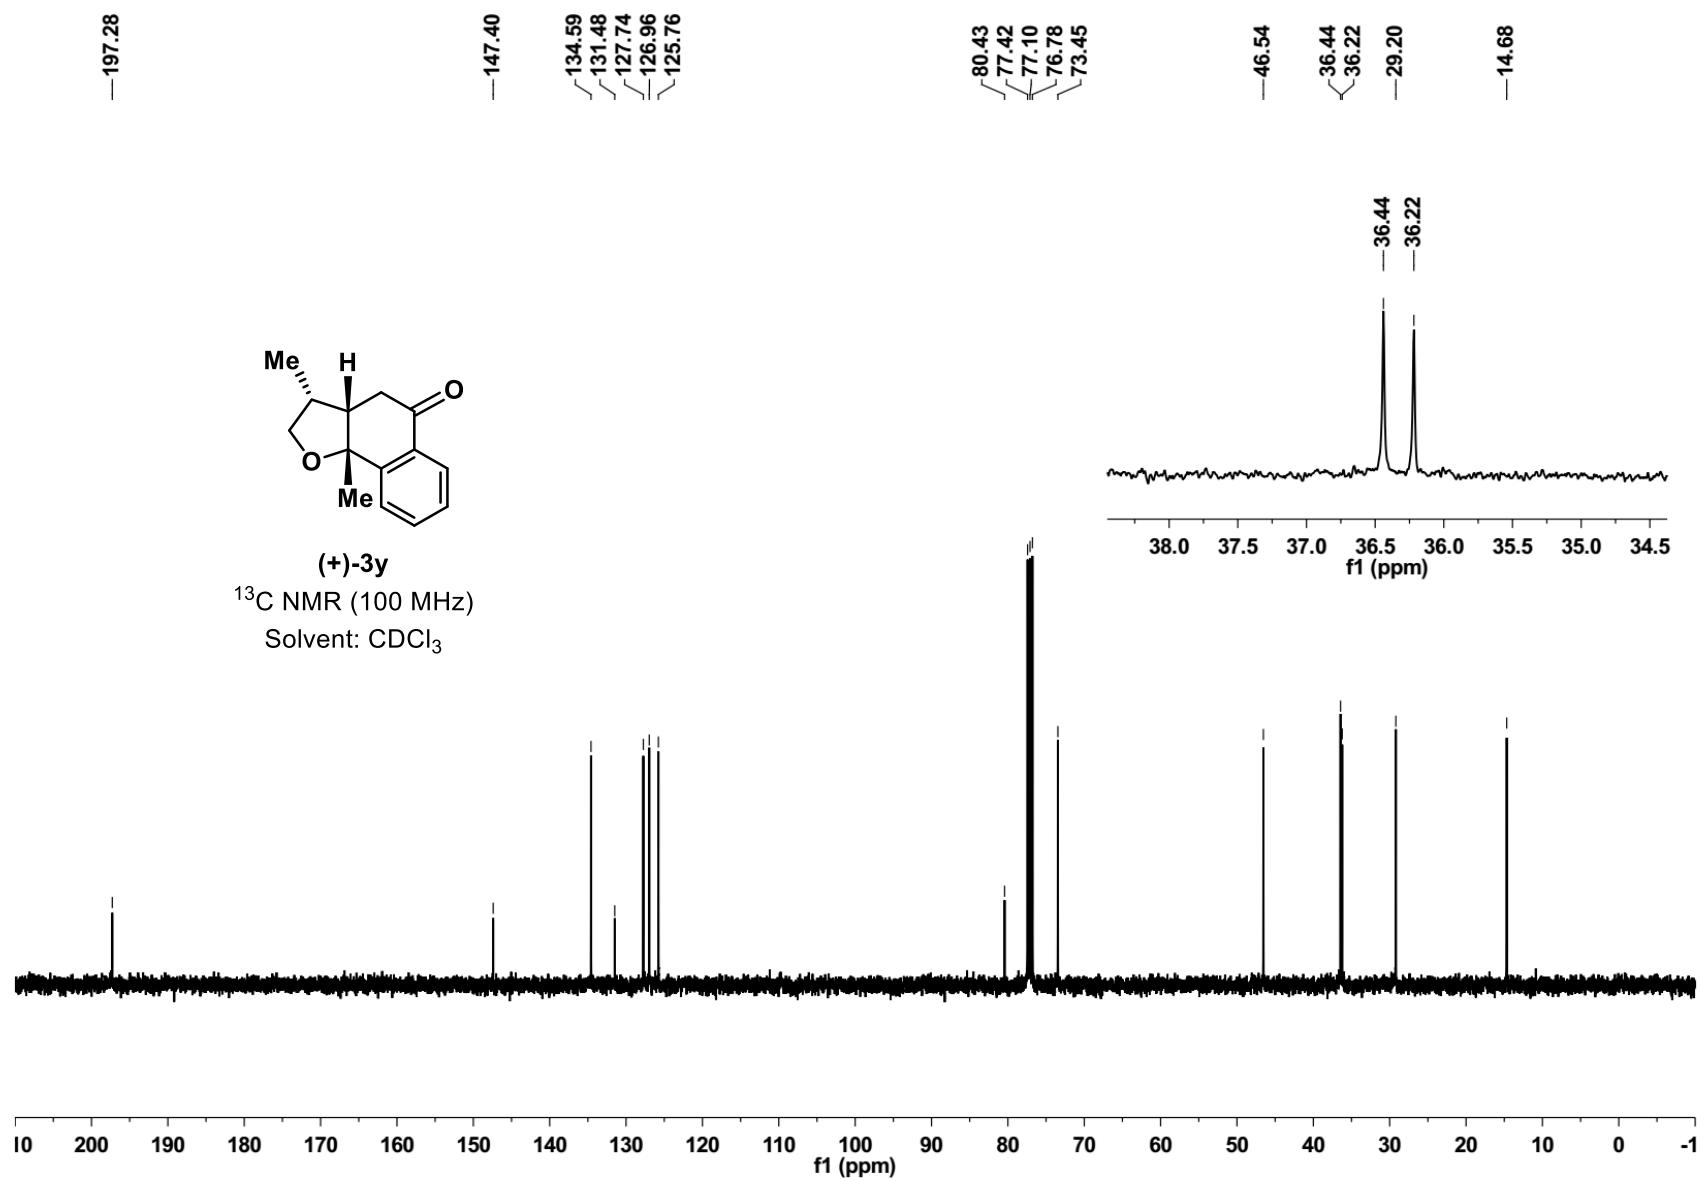

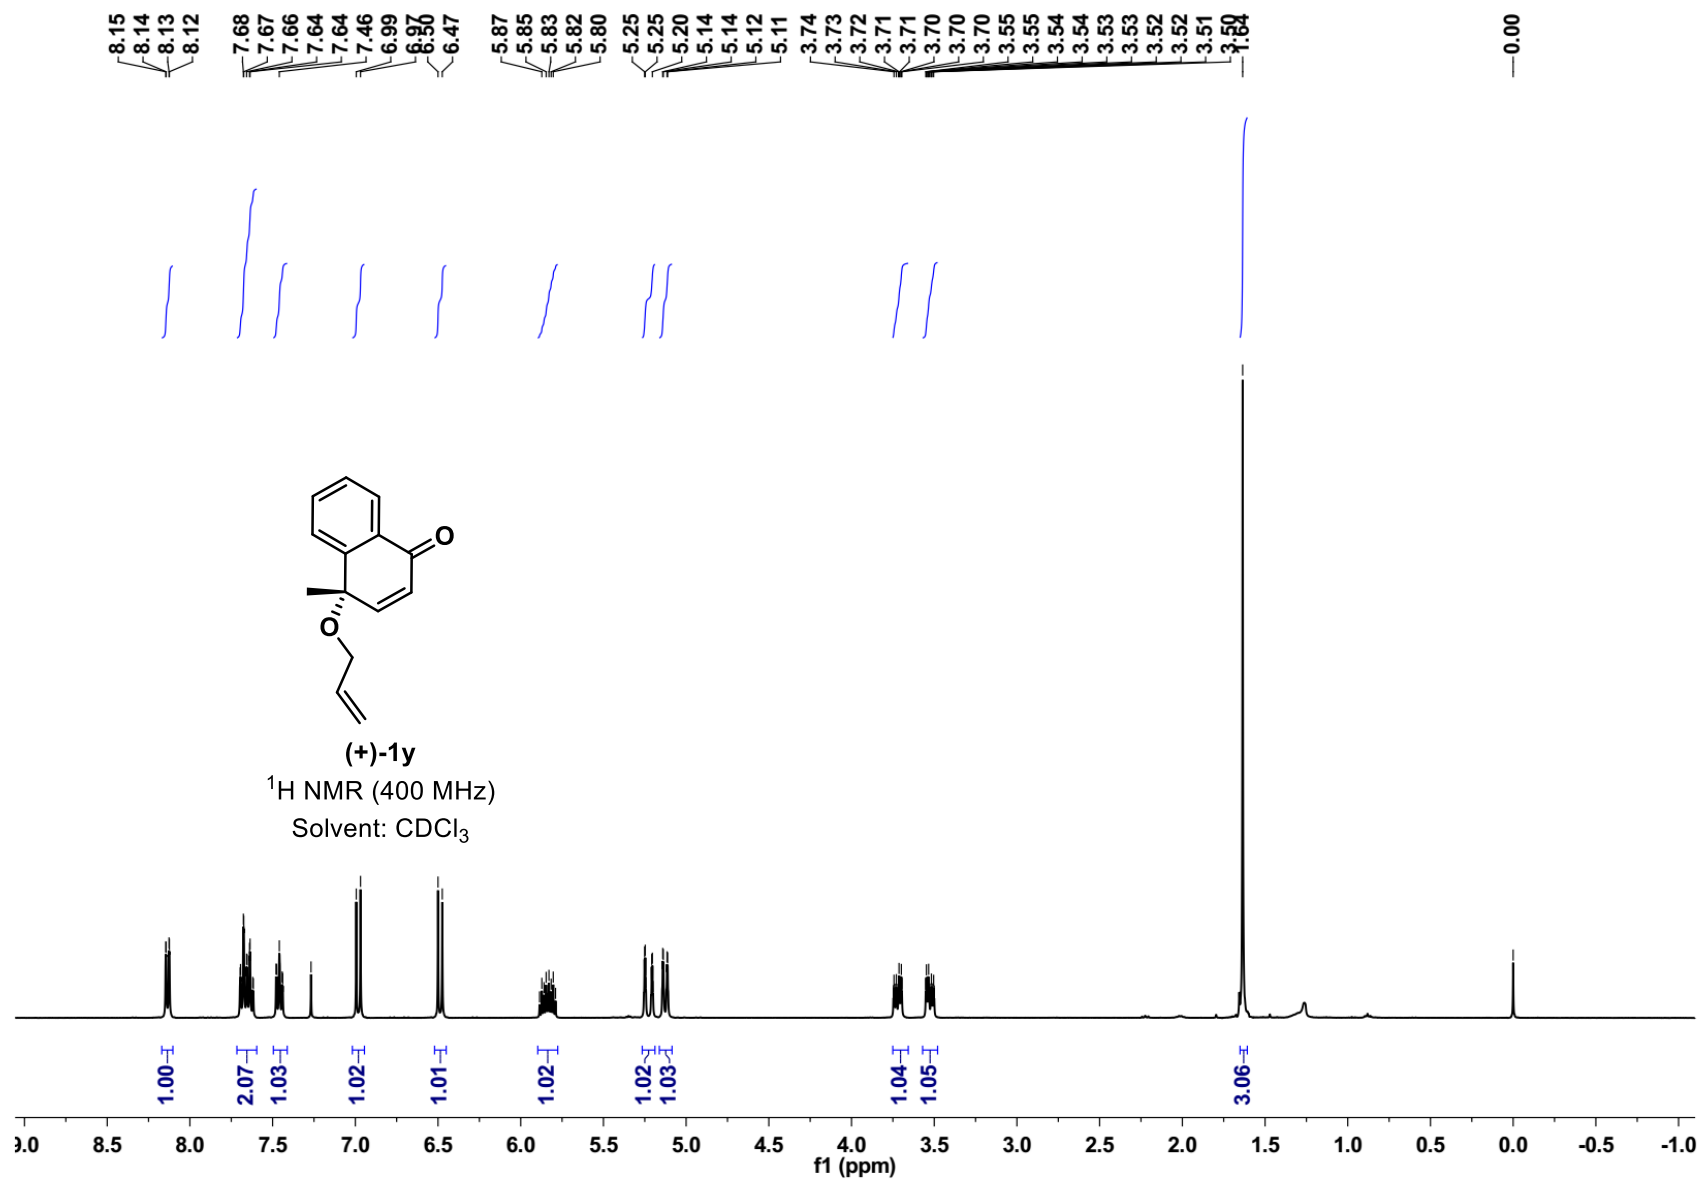

—184.31

—152.71

—145.21

134.64

133.34

131.30

130.11

128.21

126.79

—116.91

77.42

77.10

76.78

73.76

—66.40

—30.63

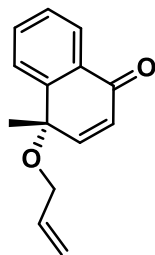

(+)-1y

<sup>13</sup>C NMR (100 MHz)

Solvent: CDCl<sub>3</sub>

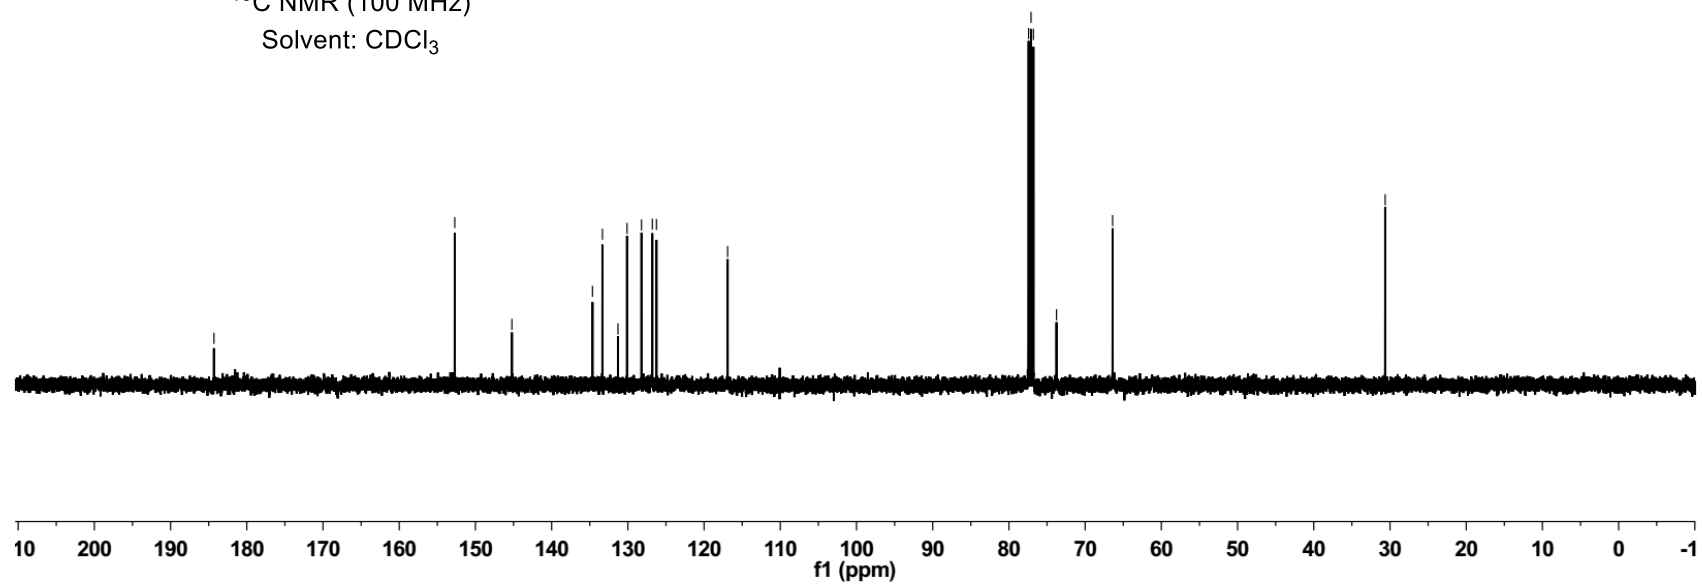



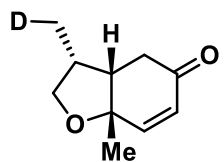

[D<sub>1</sub>]-3a

<sup>1</sup>H NMR (400 MHz)  
Solvent: CDCl<sub>3</sub>

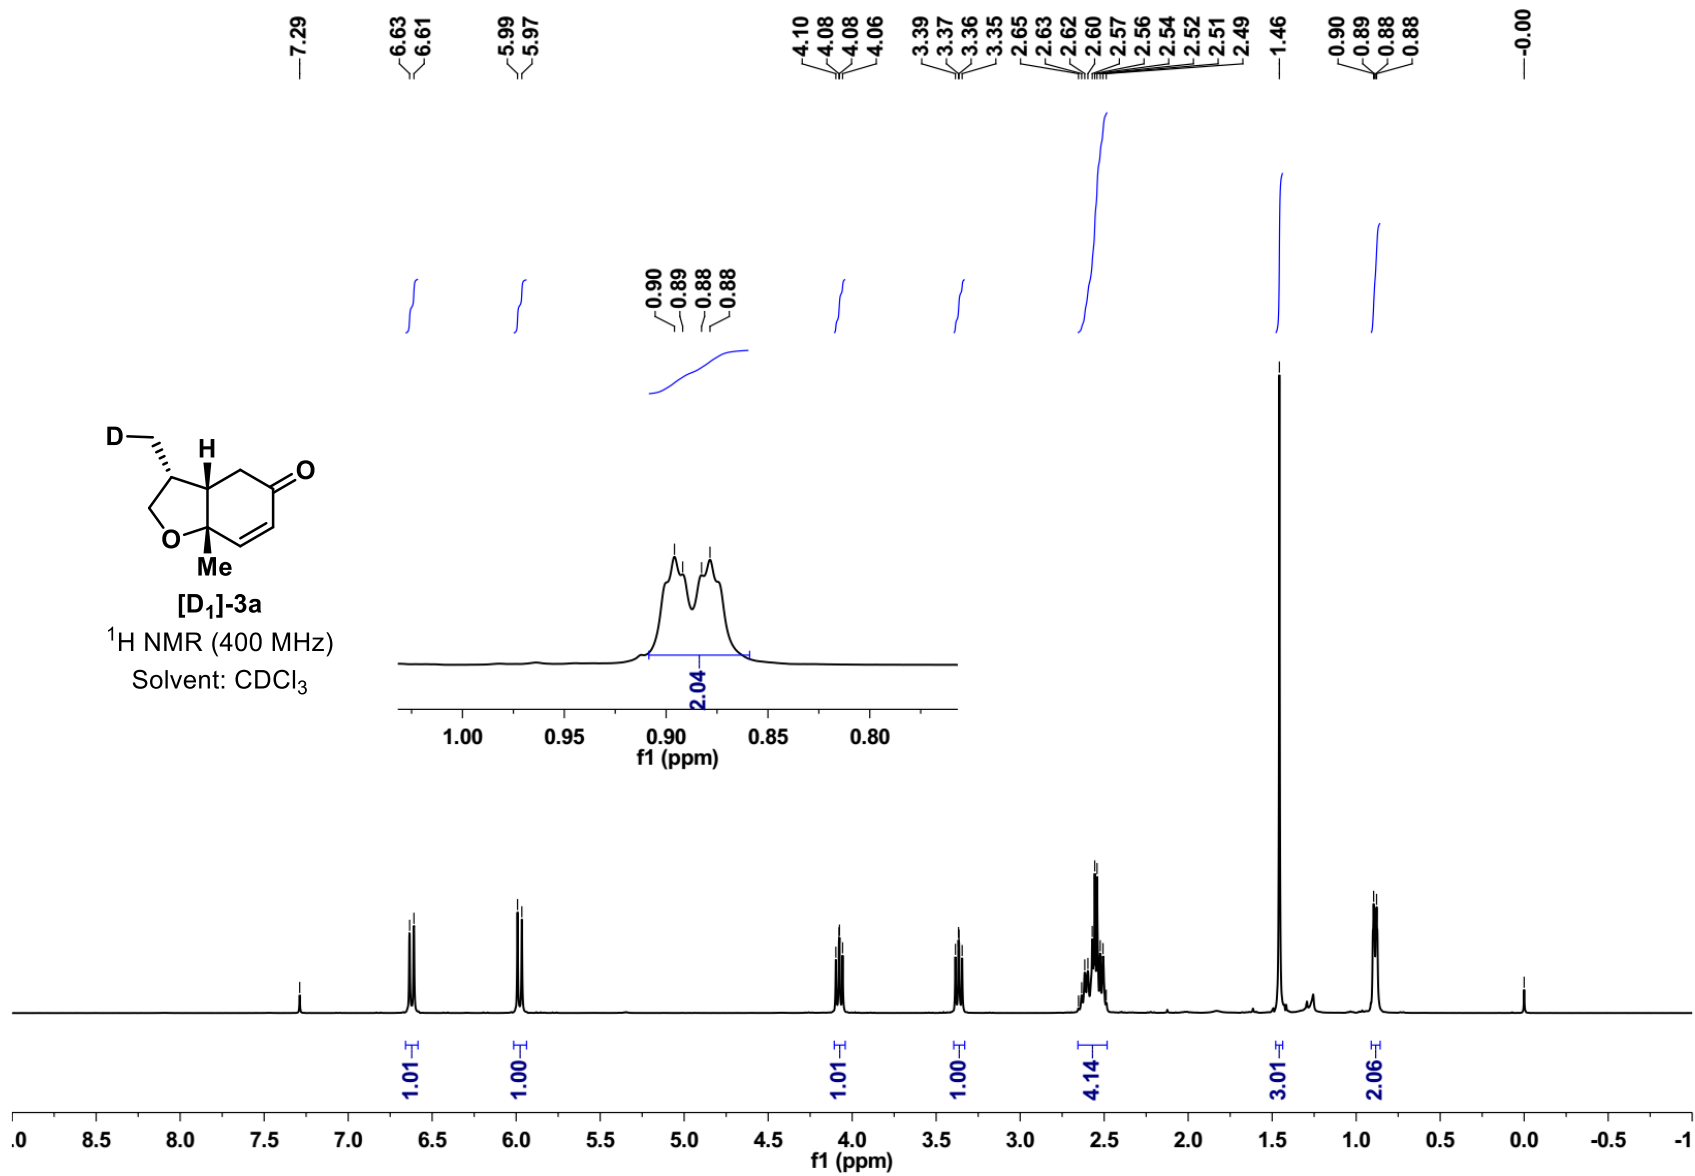

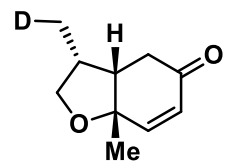

[D<sub>1</sub>]-3a

<sup>13</sup>C NMR (100 MHz)

Solvent: CDCl<sub>3</sub>

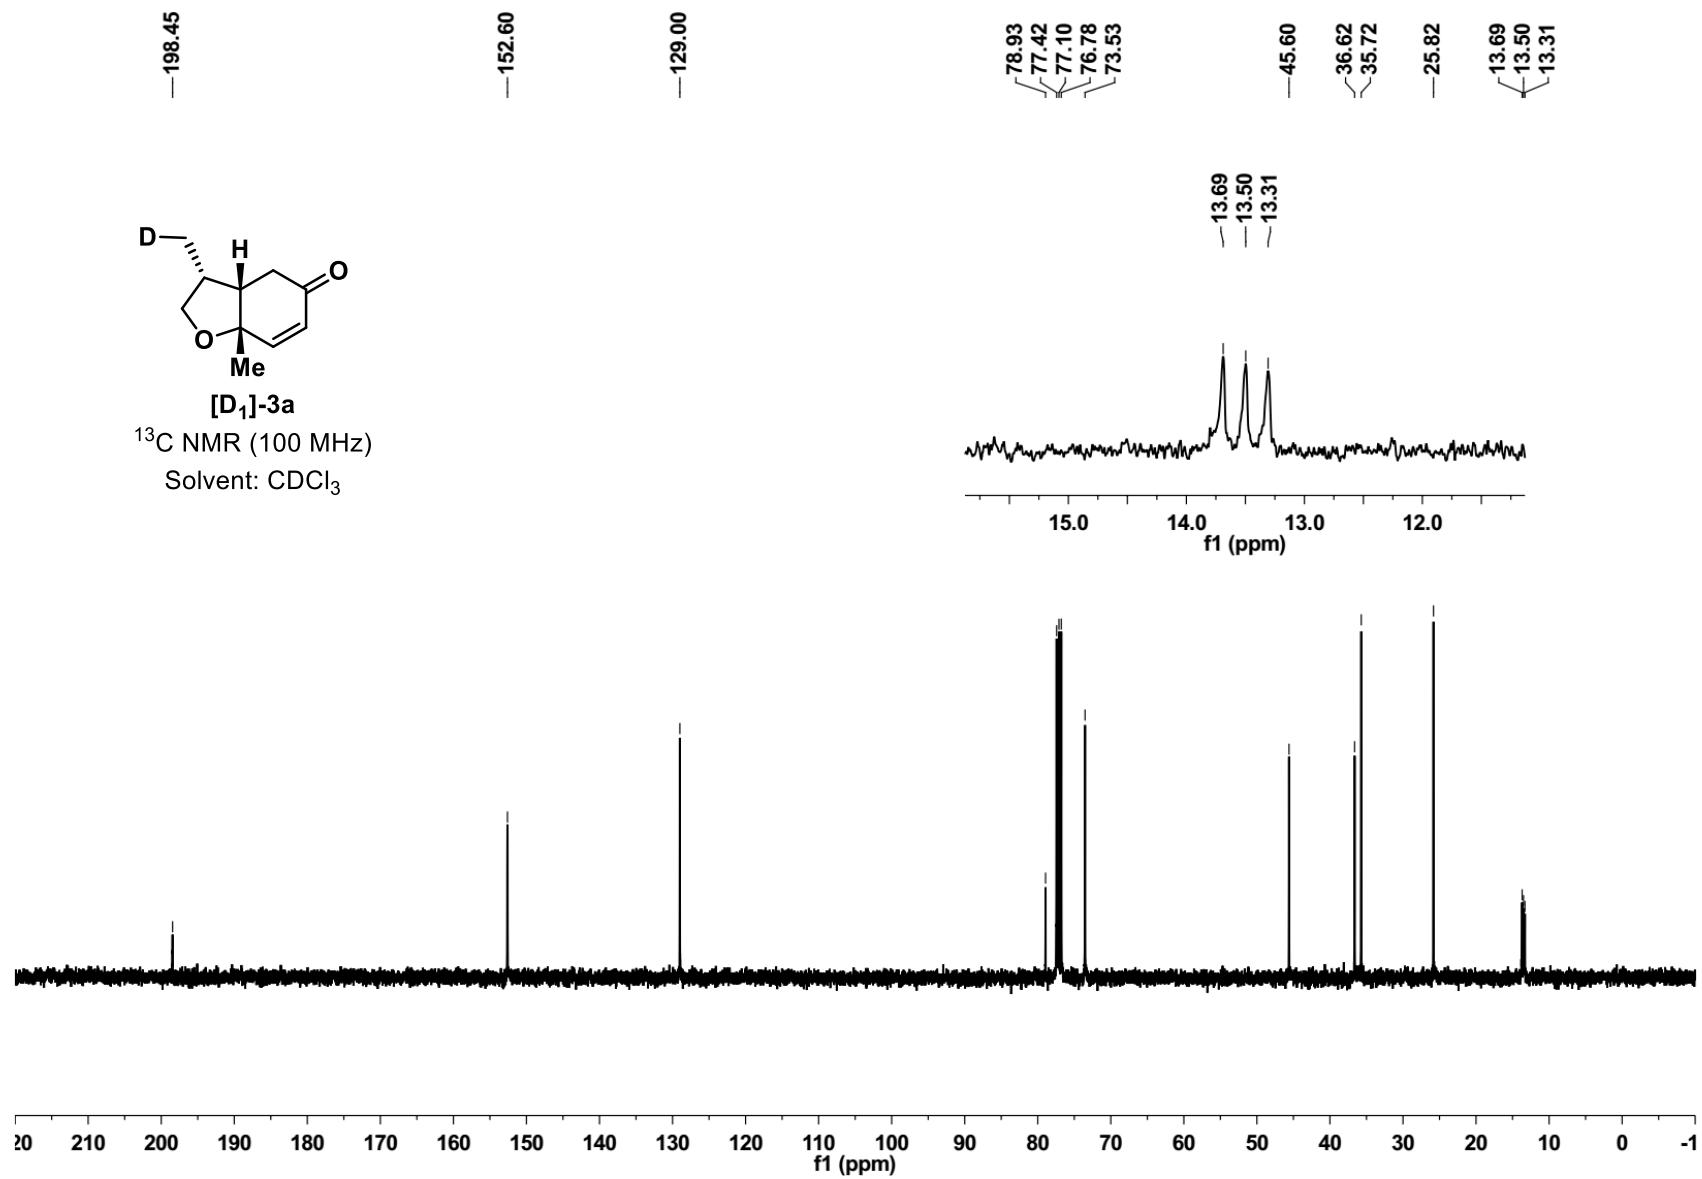

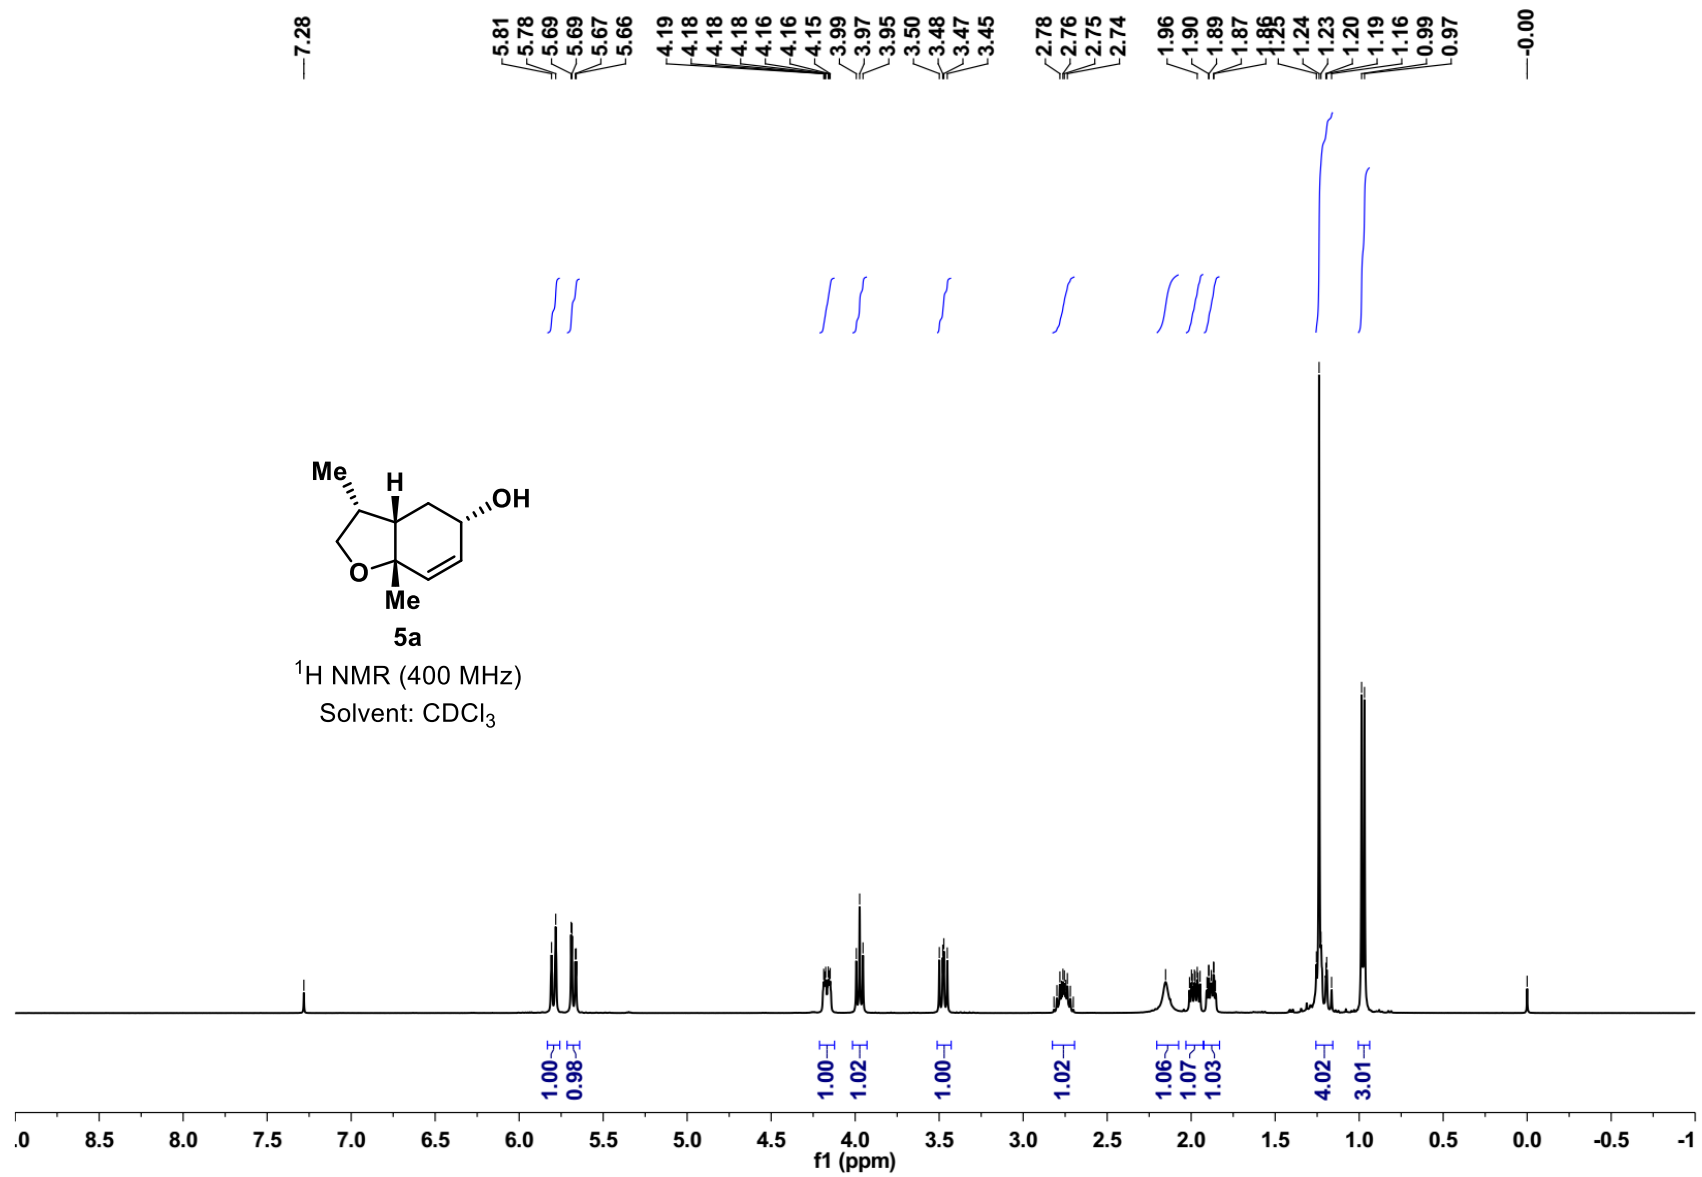

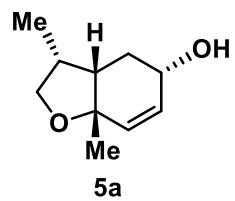

<sup>13</sup>C NMR (400 MHz)  
Solvent: CDCl<sub>3</sub>

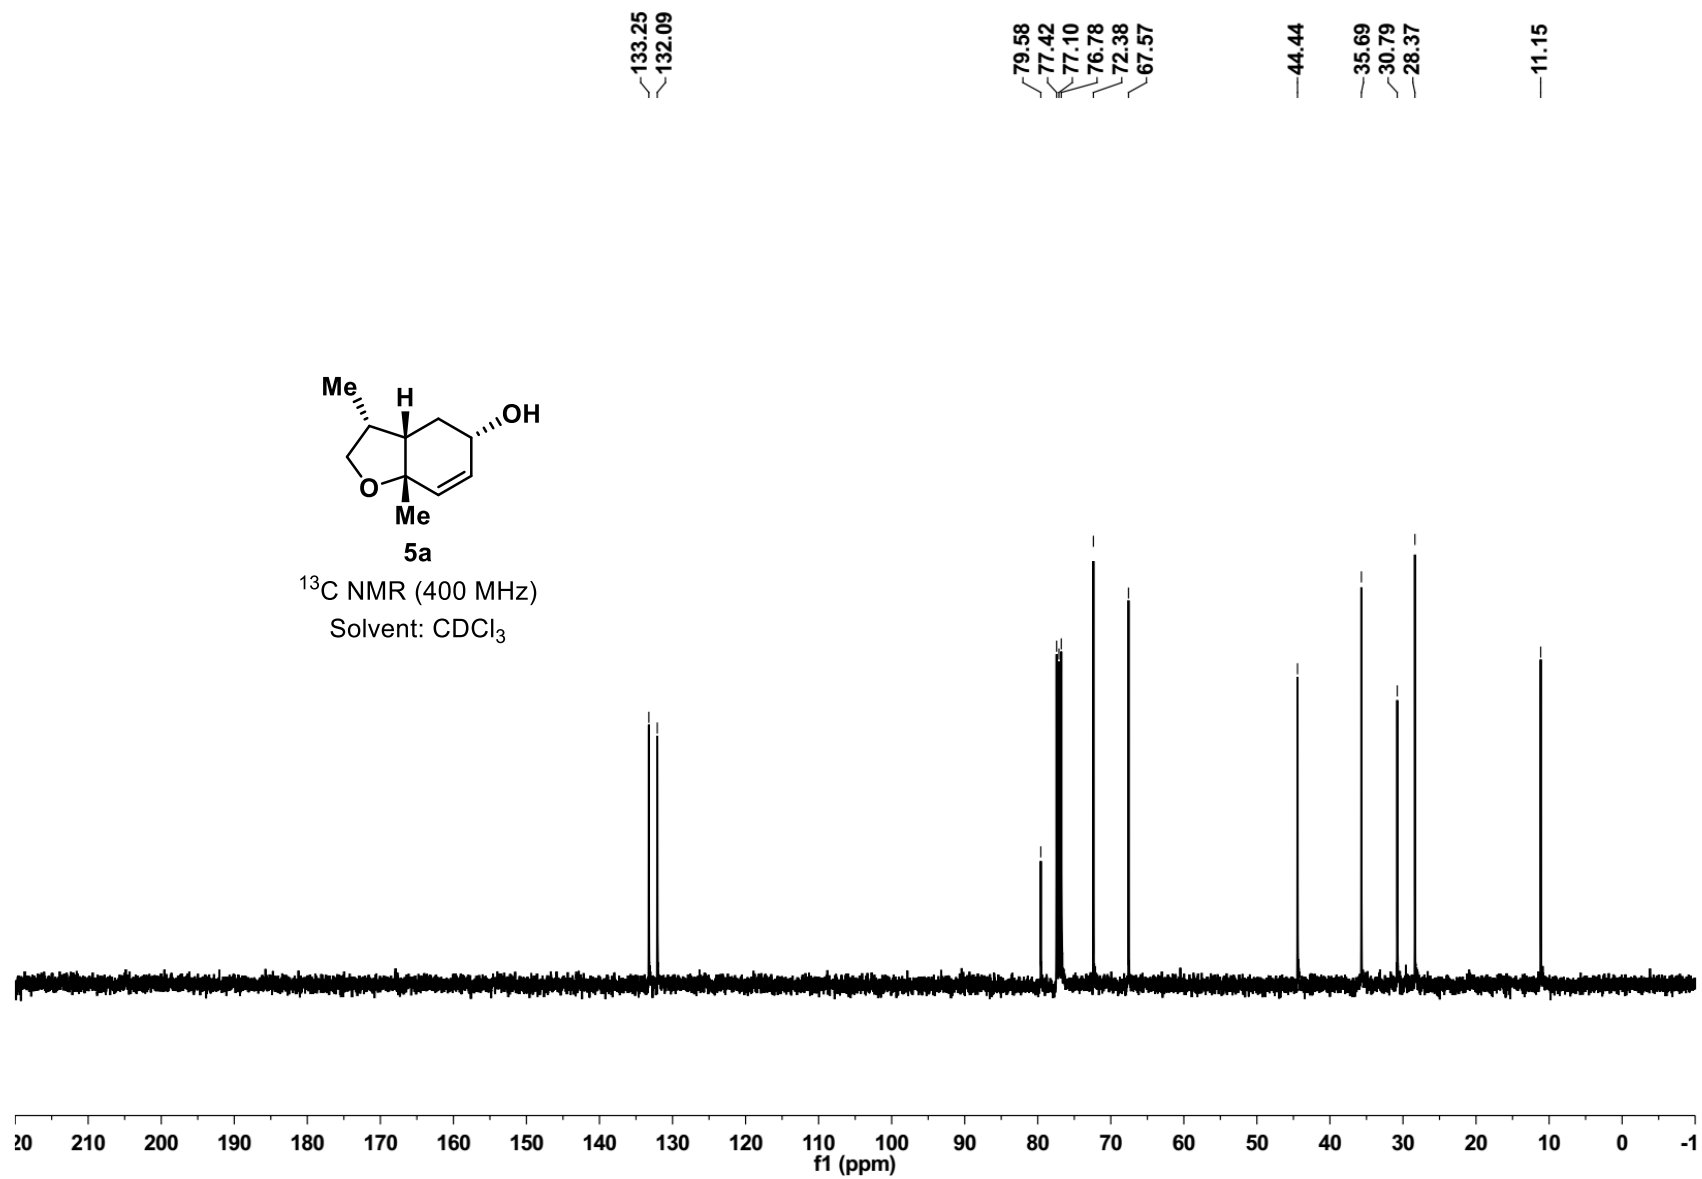

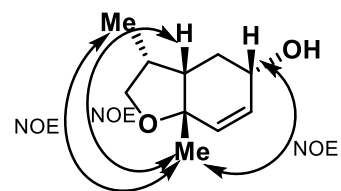

5a

NOE (400 MHz)  
Solvent: CDCl<sub>3</sub>

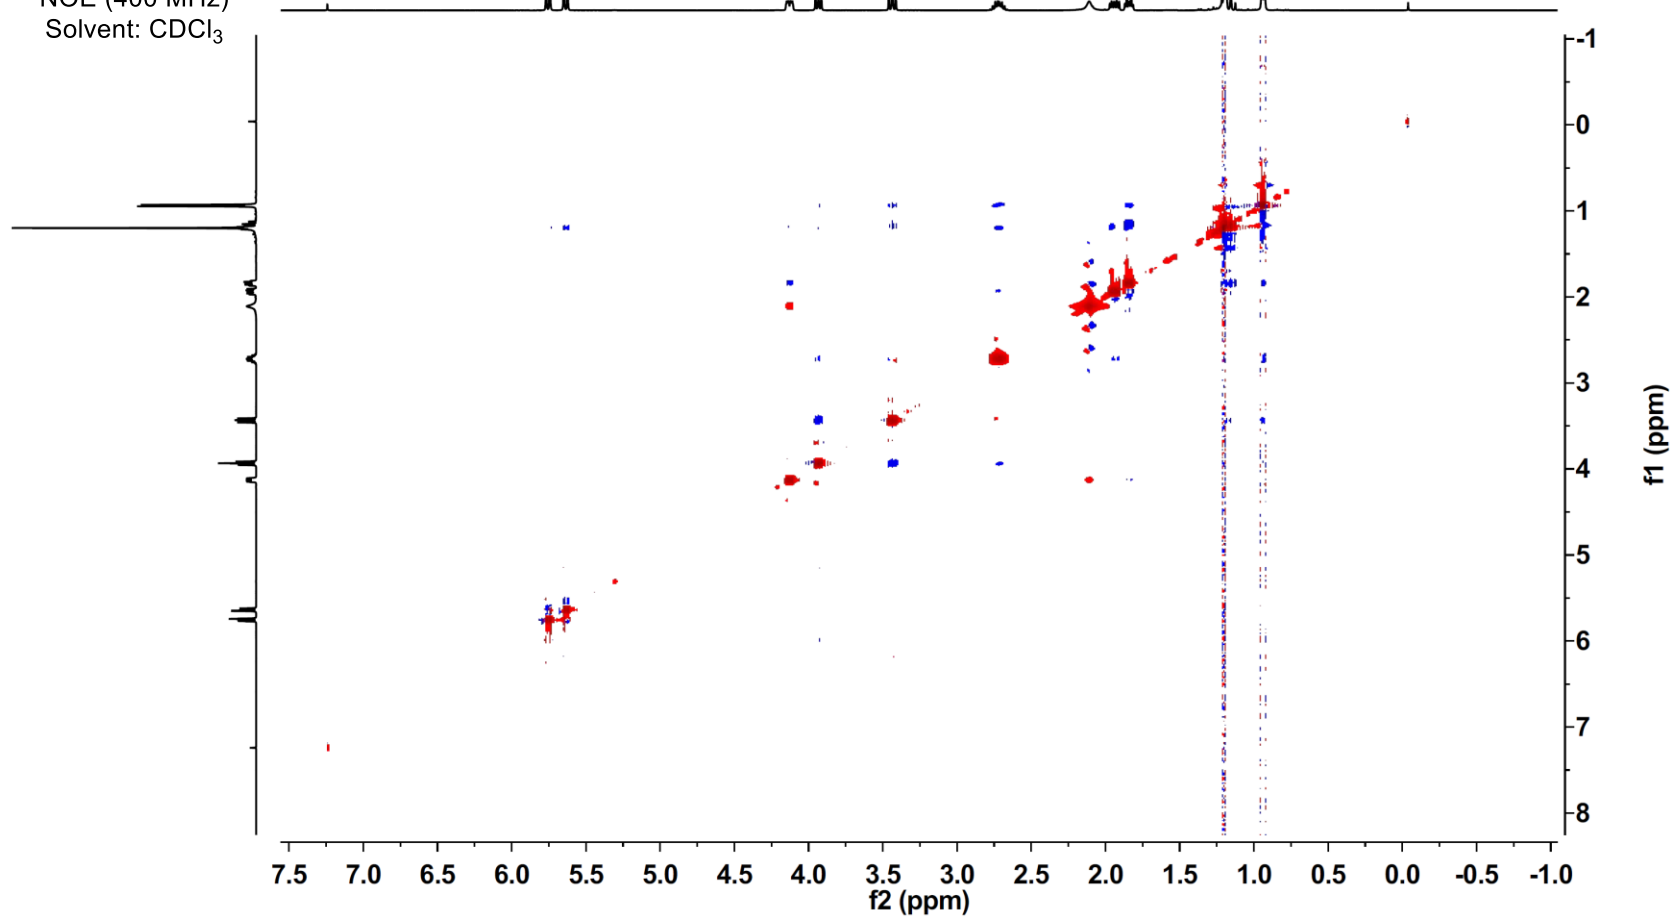

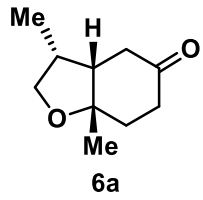

<sup>1</sup>H NMR (400 MHz)  
Solvent: CDCl<sub>3</sub>

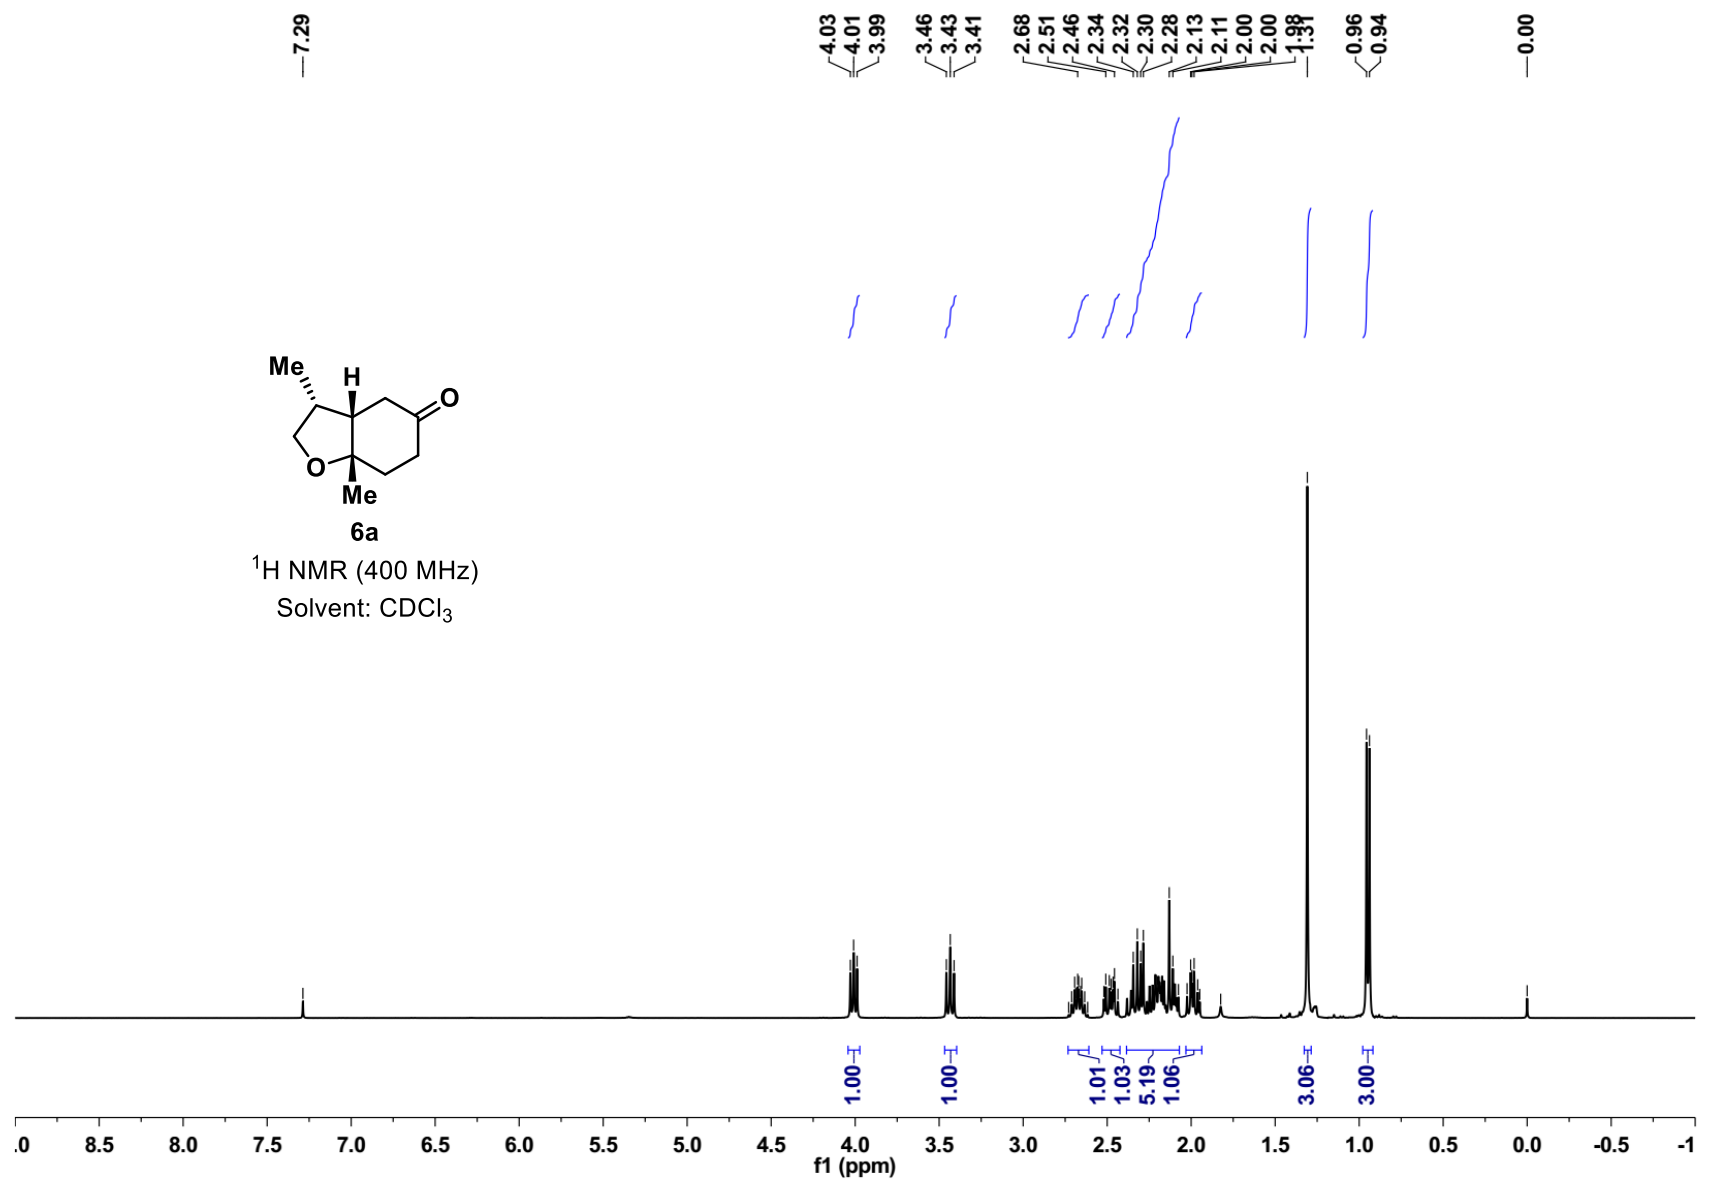

—213.32

81.97  
77.42  
77.10  
76.78  
72.66

46.26  
38.12  
36.67  
35.76  
34.20  
27.52

—11.86

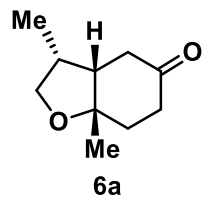

<sup>13</sup>C NMR (100 MHz)

Solvent: CDCl<sub>3</sub>

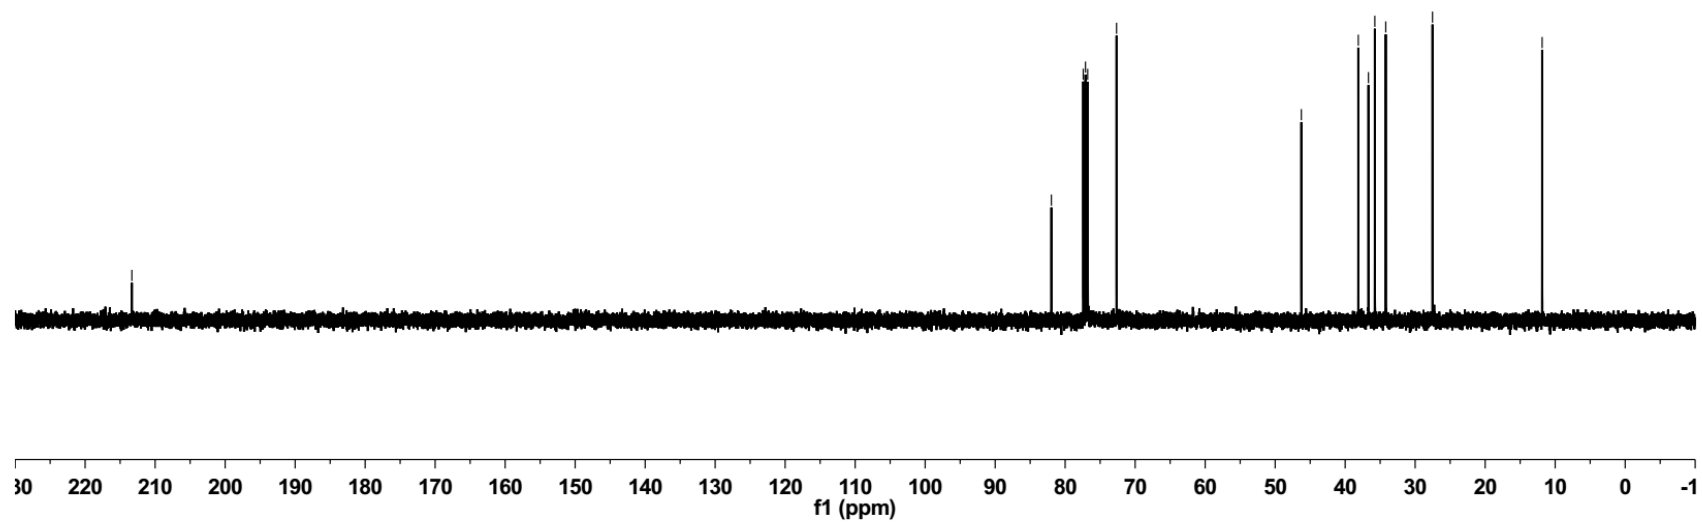

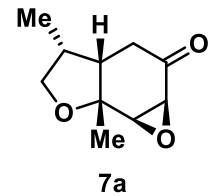

<sup>1</sup>H NMR (400 MHz)  
Solvent: CDCl<sub>3</sub>

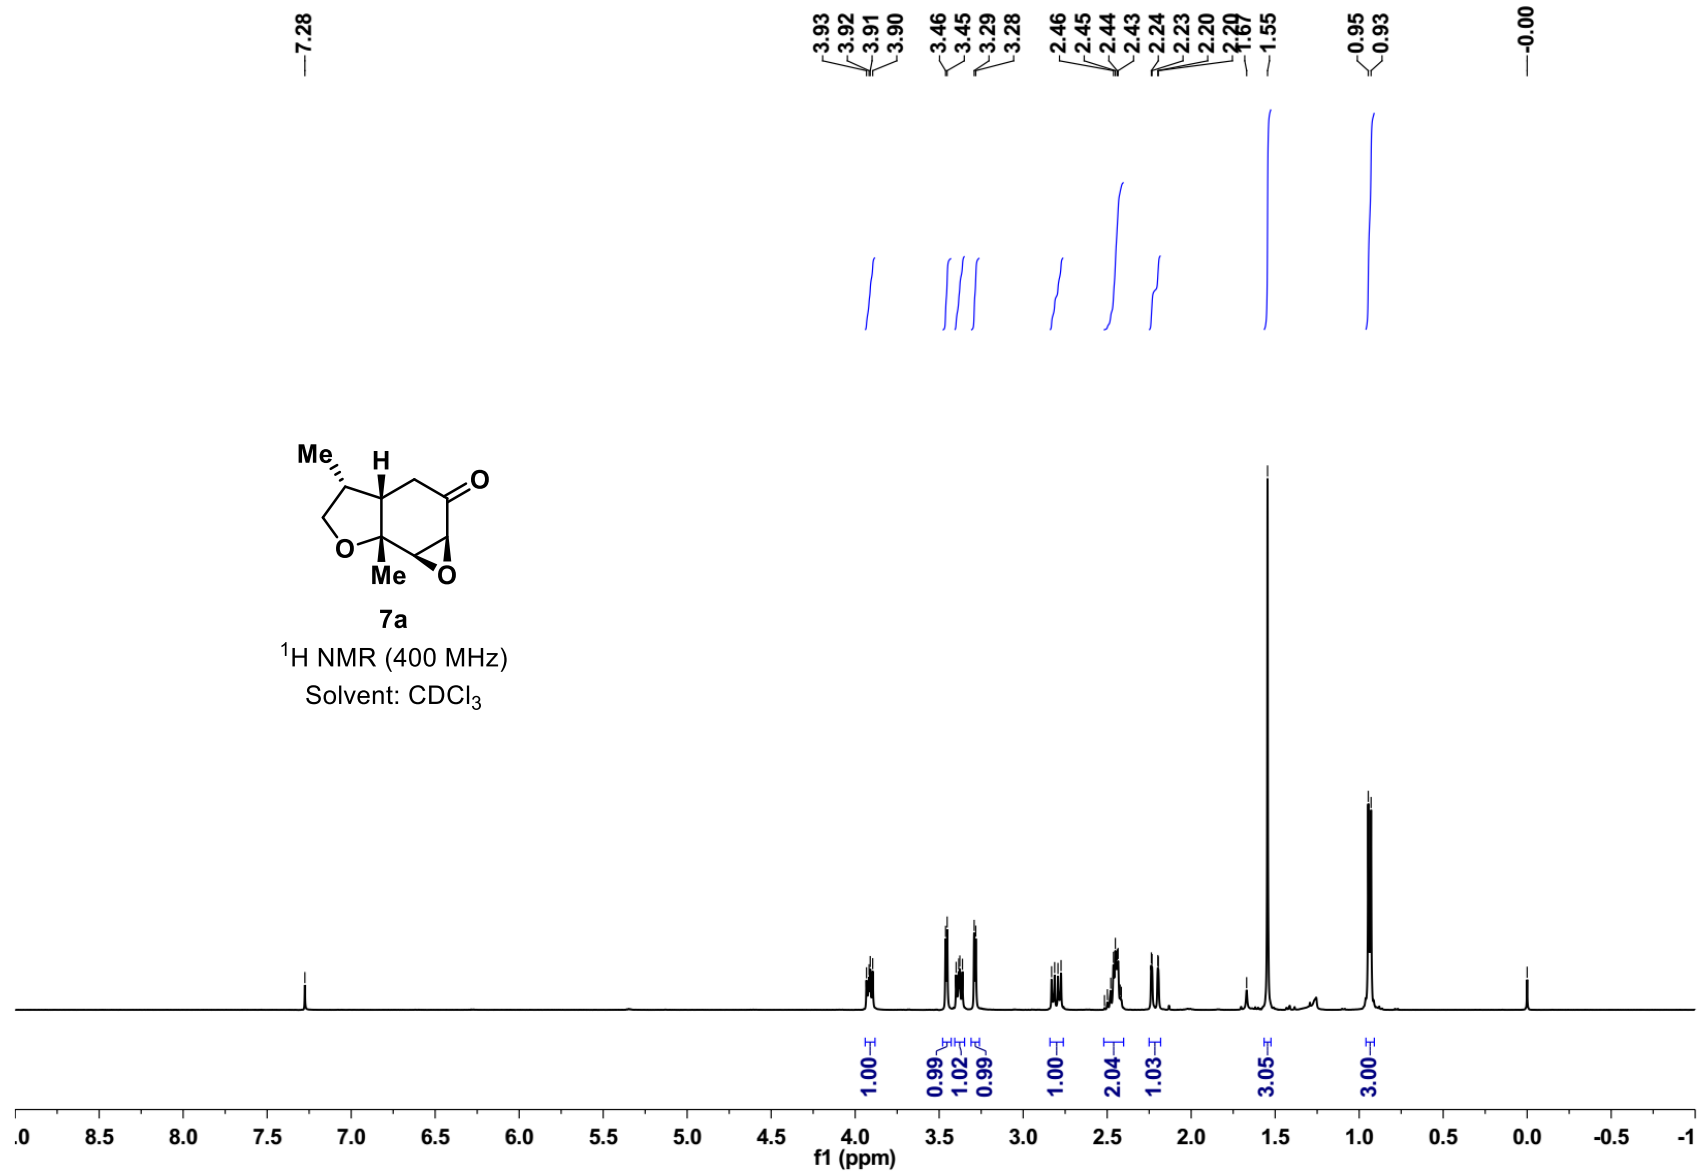



—207.19

78.40  
77.42  
77.10  
76.78  
73.42  
64.38  
55.54  
48.54  
38.70  
33.05  
25.39  
12.64

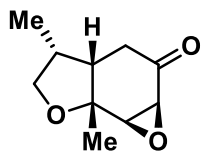

7a

<sup>13</sup>C NMR (100 MHz)

Solvent: CDCl<sub>3</sub>

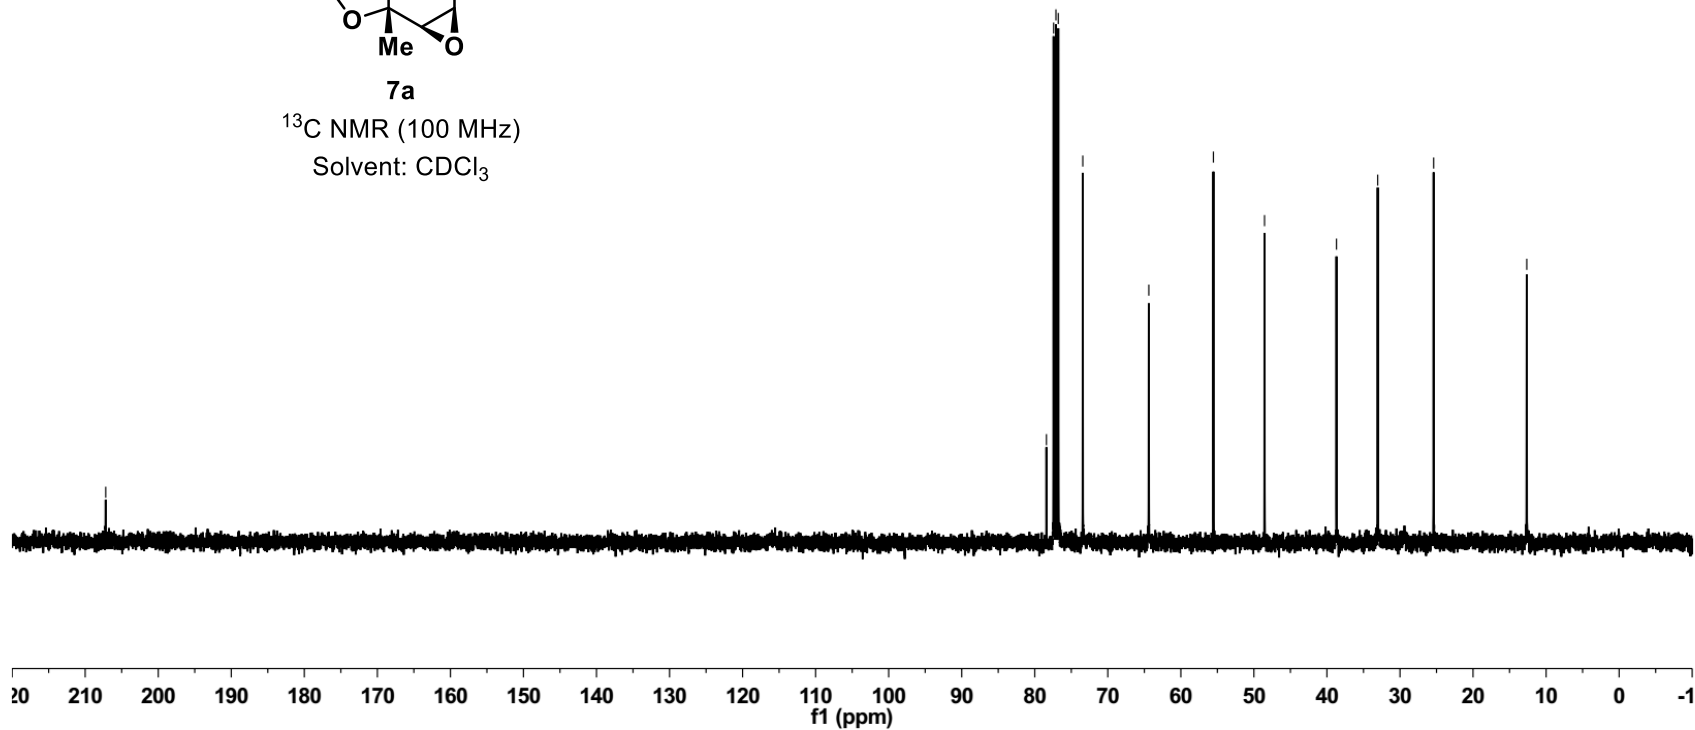

7.40  
7.40  
7.27

4.12  
4.10  
4.10  
4.08

3.42  
3.40  
3.39  
3.38

2.86  
2.85  
2.81  
2.80  
2.71  
2.70  
2.66  
2.62  
2.61  
2.57

0.89  
0.87

-0.00

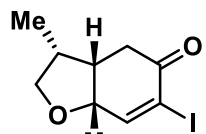

8a

<sup>1</sup>H NMR (400 MHz)  
Solvent: CDCl<sub>3</sub>

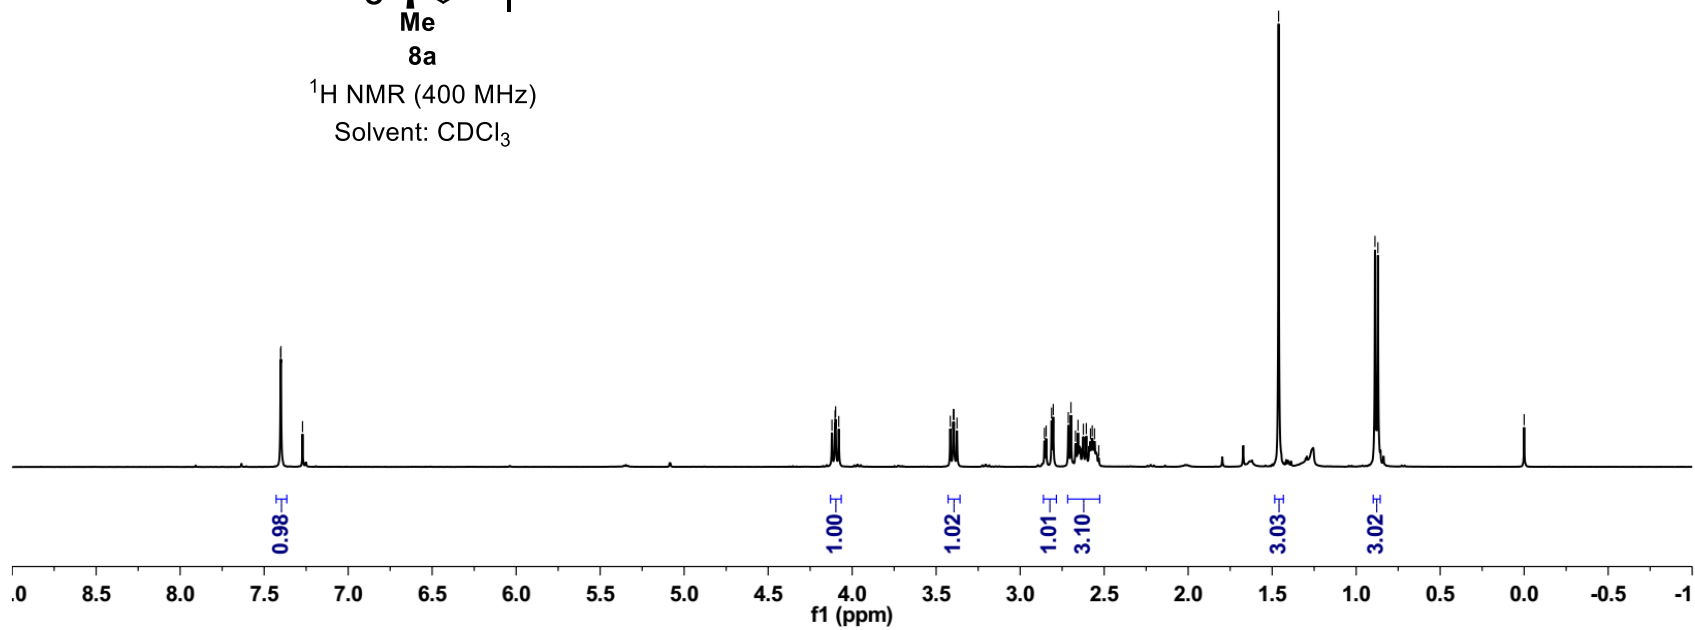

—191.31

—161.22

—103.95

82.19

77.42

77.10

76.78

73.85

—46.06

—36.54

—34.35

—25.37

—13.80

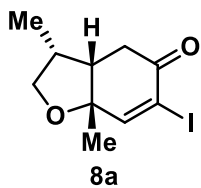

<sup>13</sup>C NMR (100 MHz)  
Solvent: CDCl<sub>3</sub>

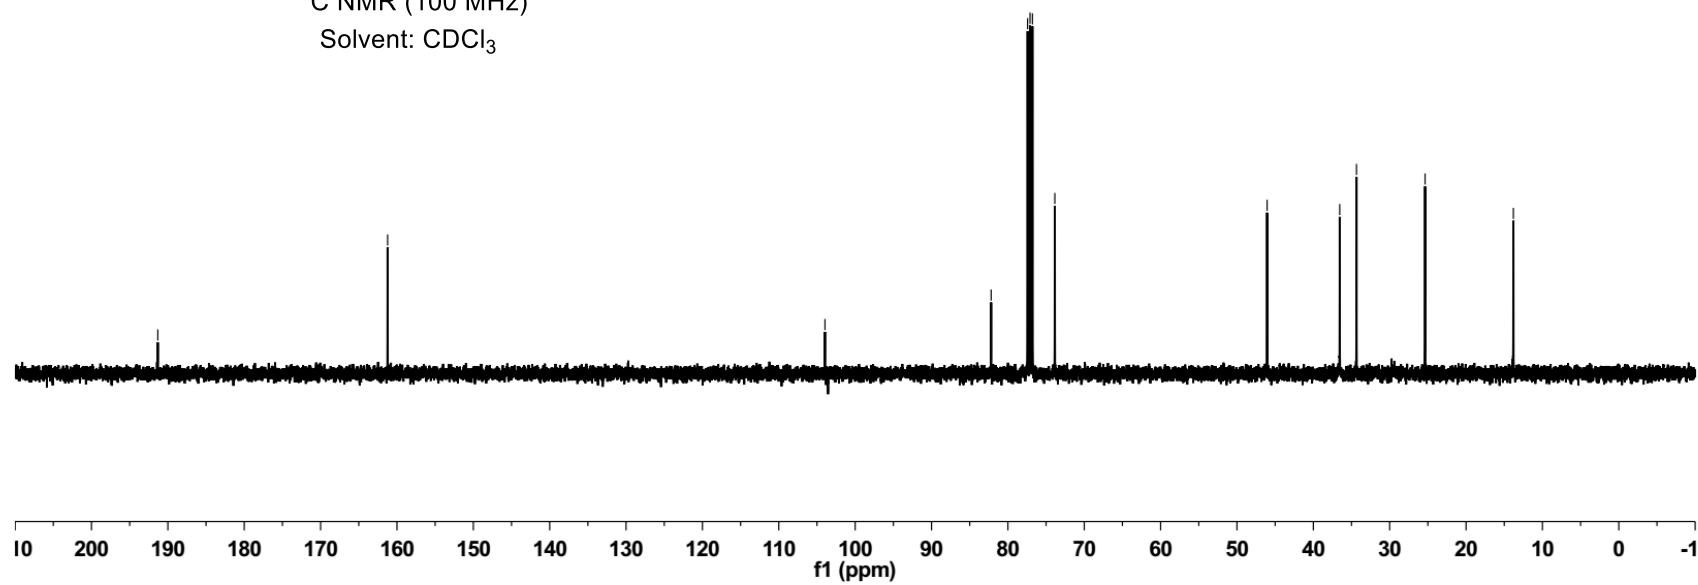

7.26  
7.01  
6.99  
6.68  
6.68  
6.60  
6.60  
6.58

3.72  
3.70  
3.69  
3.67  
3.66  
3.64  
3.63  
3.22  
3.21  
3.19  
3.17  
3.16  
3.14

2.24  
1.95

1.19  
1.17

0.00

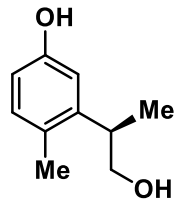

9a

<sup>1</sup>H NMR (400 MHz)  
Solvent: CDCl<sub>3</sub>

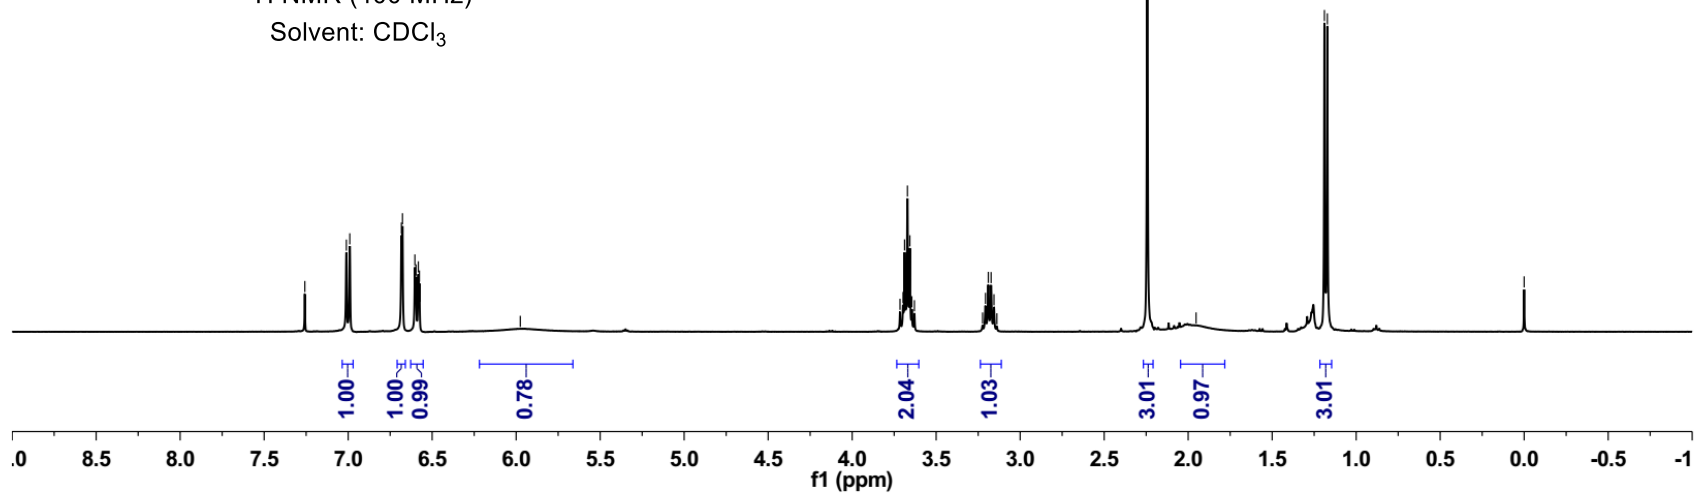

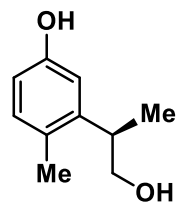

9a

$^{13}\text{C}$  NMR (100 MHz)

Solvent:  $\text{CDCl}_3$

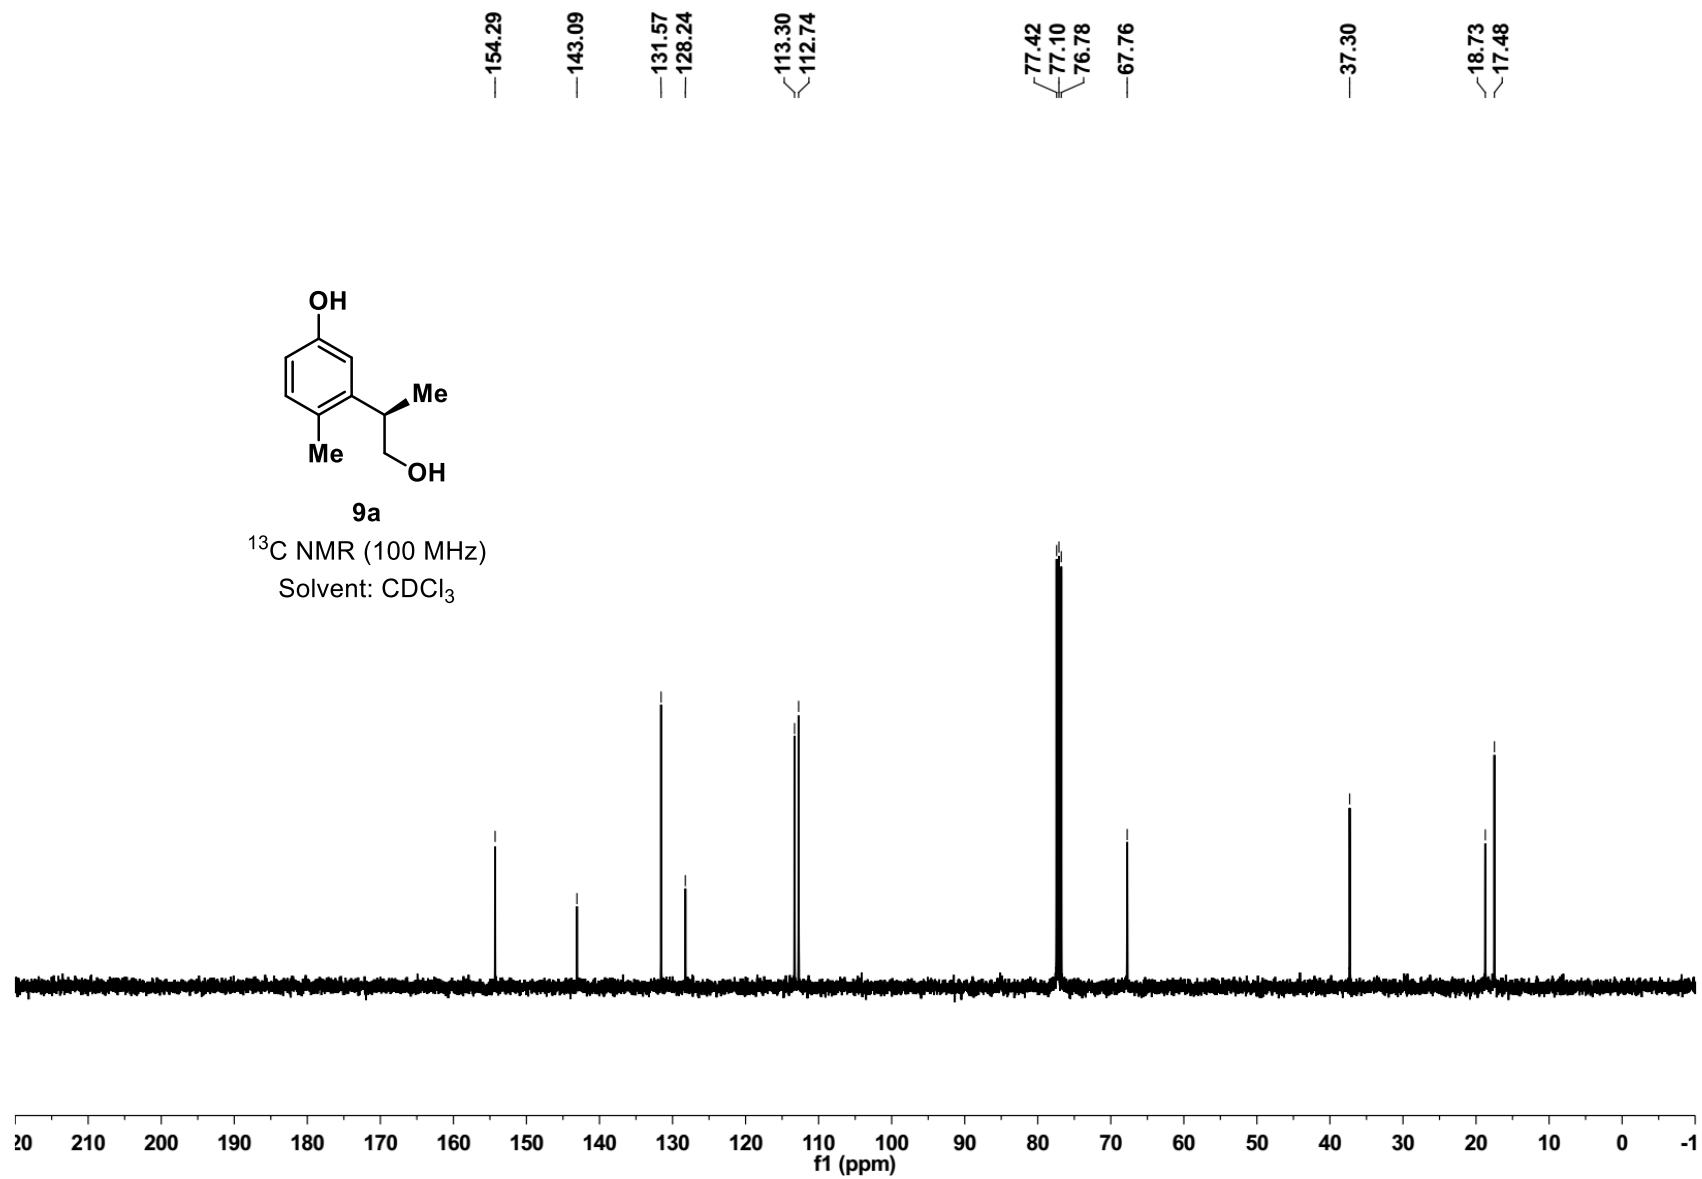

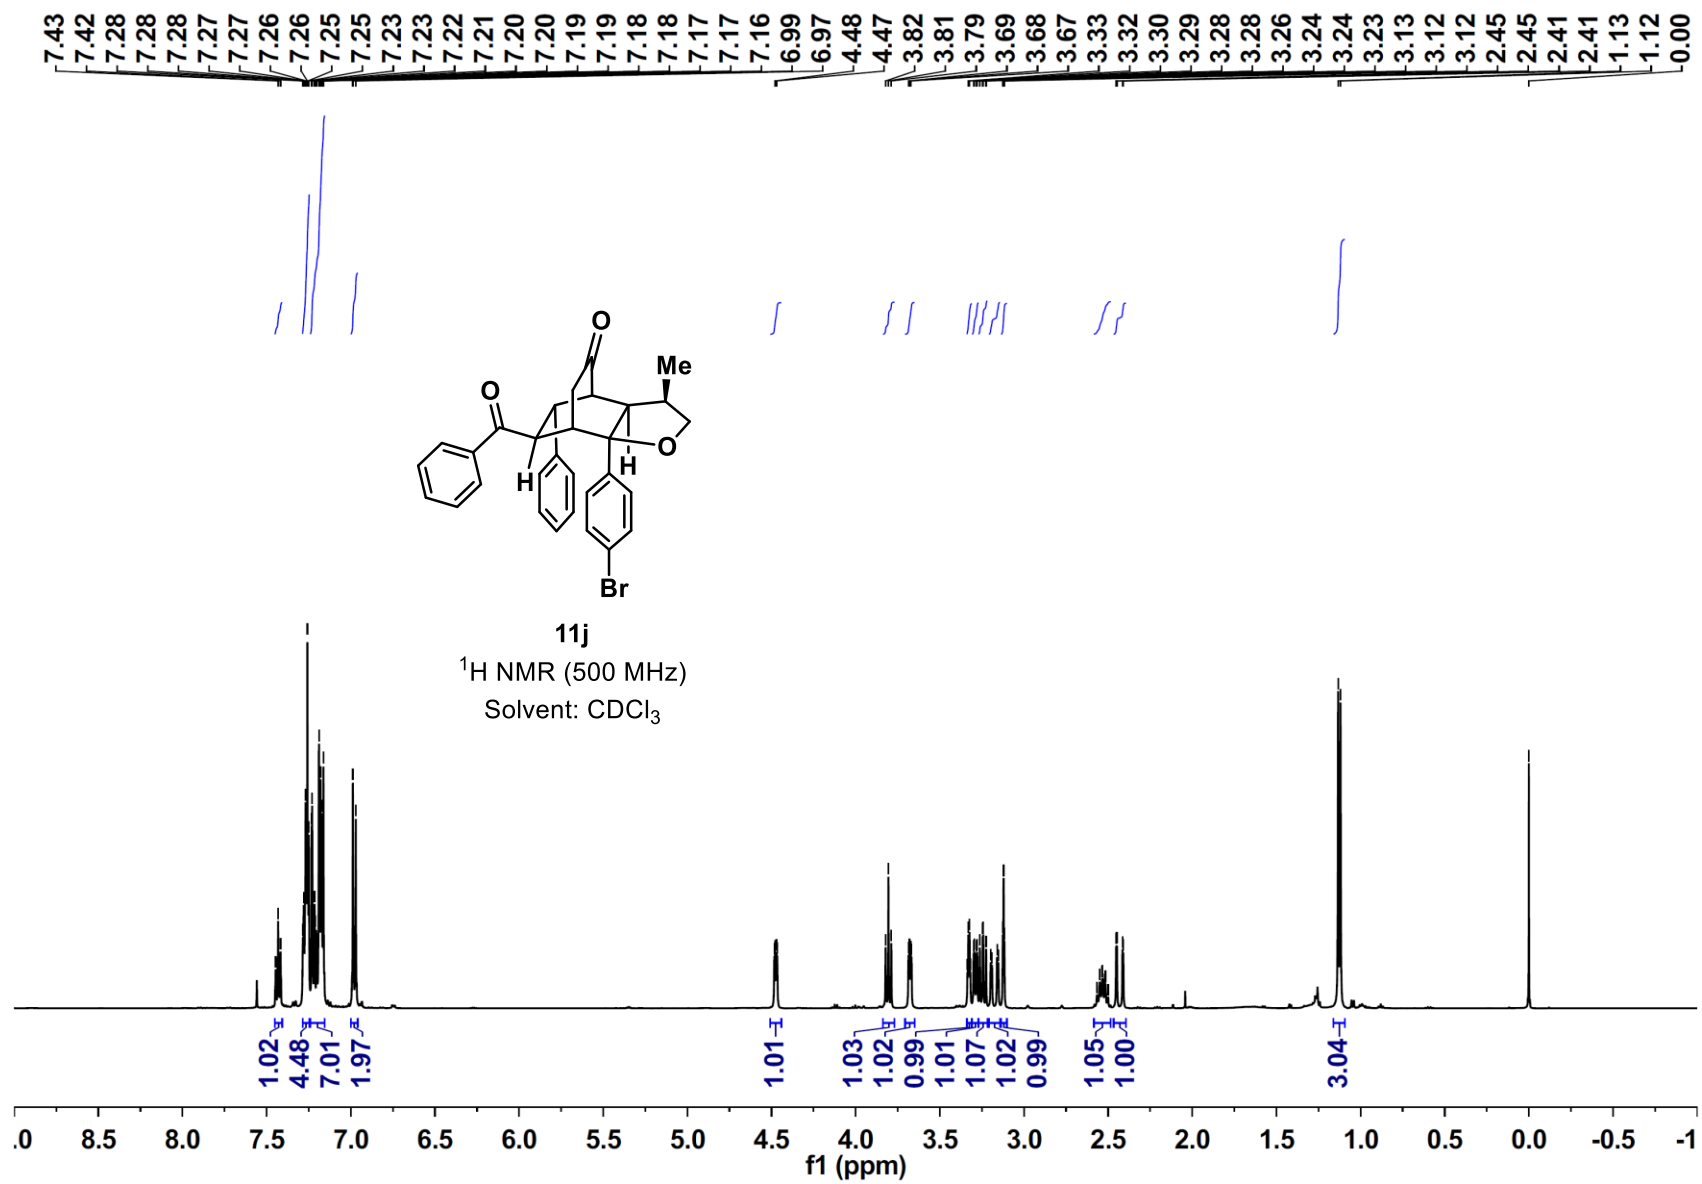

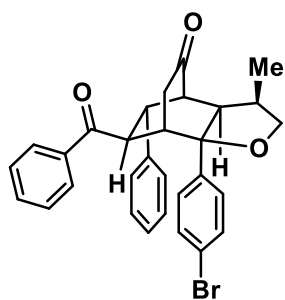

11j

$^{13}\text{C}$  NMR (125 MHz)

Solvent:  $\text{CDCl}_3$

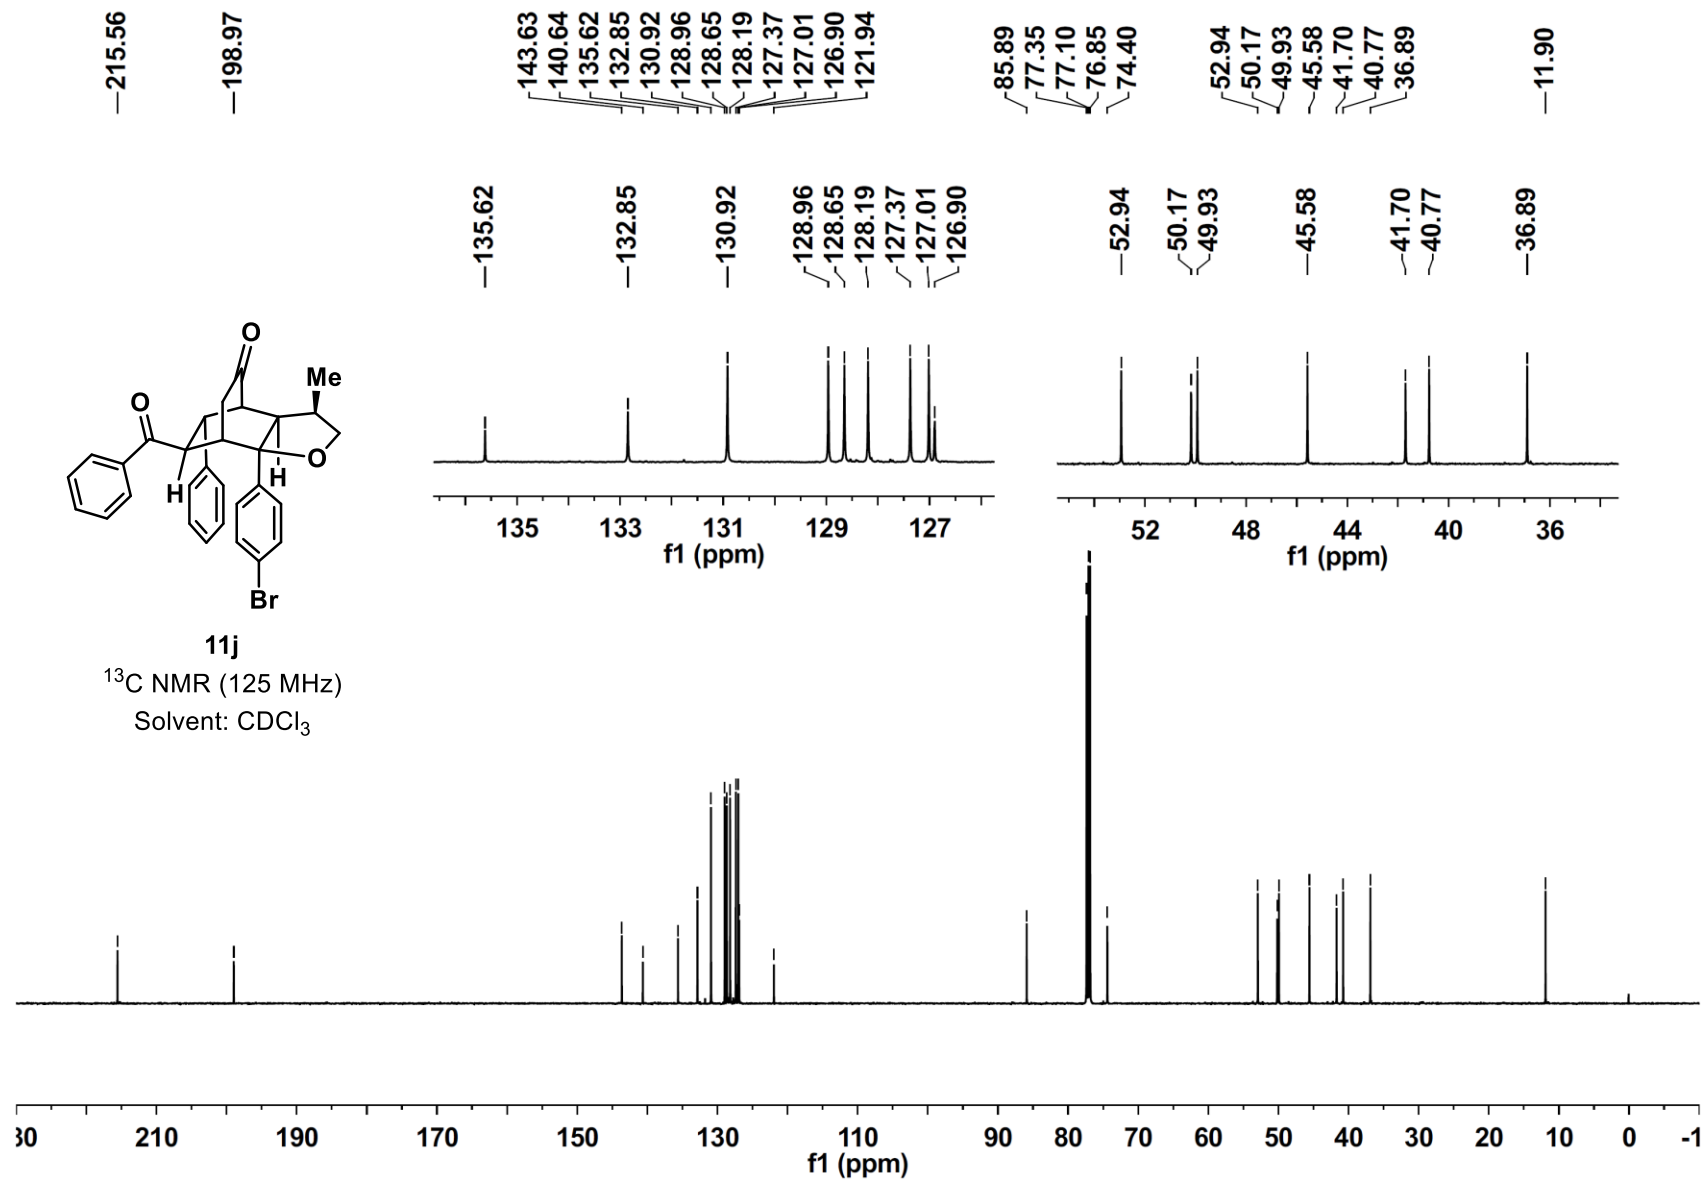

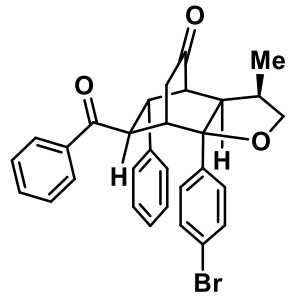

11j  
HMQC (500 MHz)  
Solvent: CDCl<sub>3</sub>

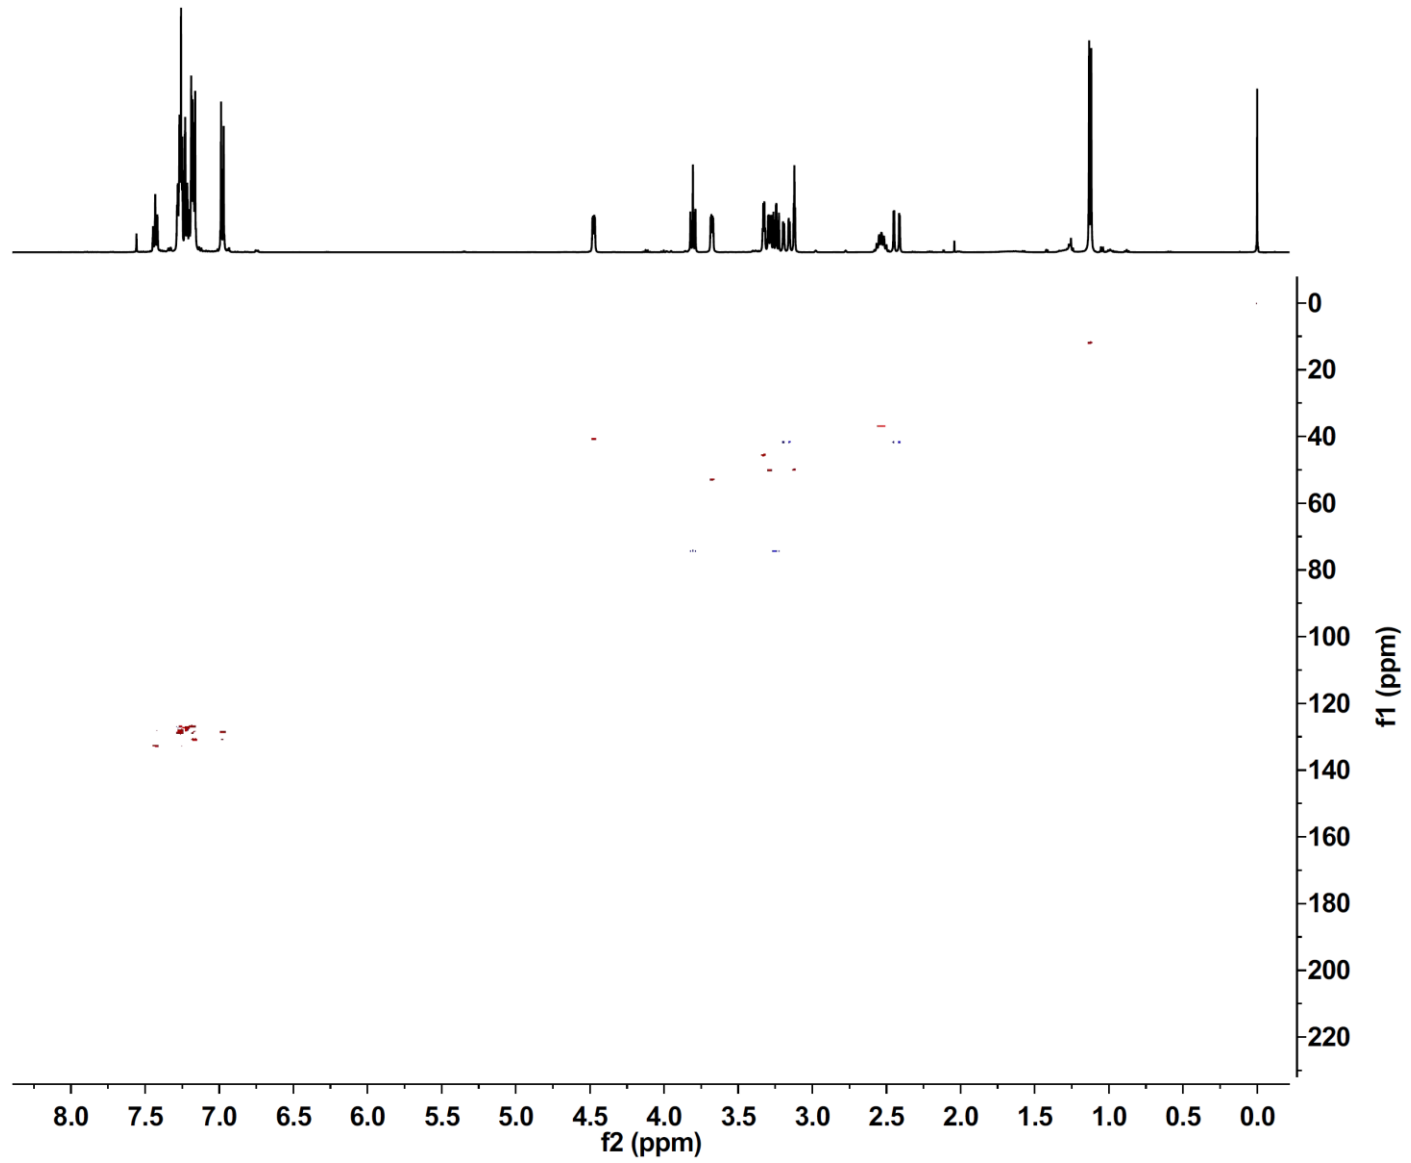



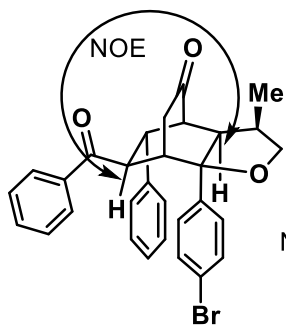

11j  
NOE (500 MHz)  
Solvent: CDCl<sub>3</sub>

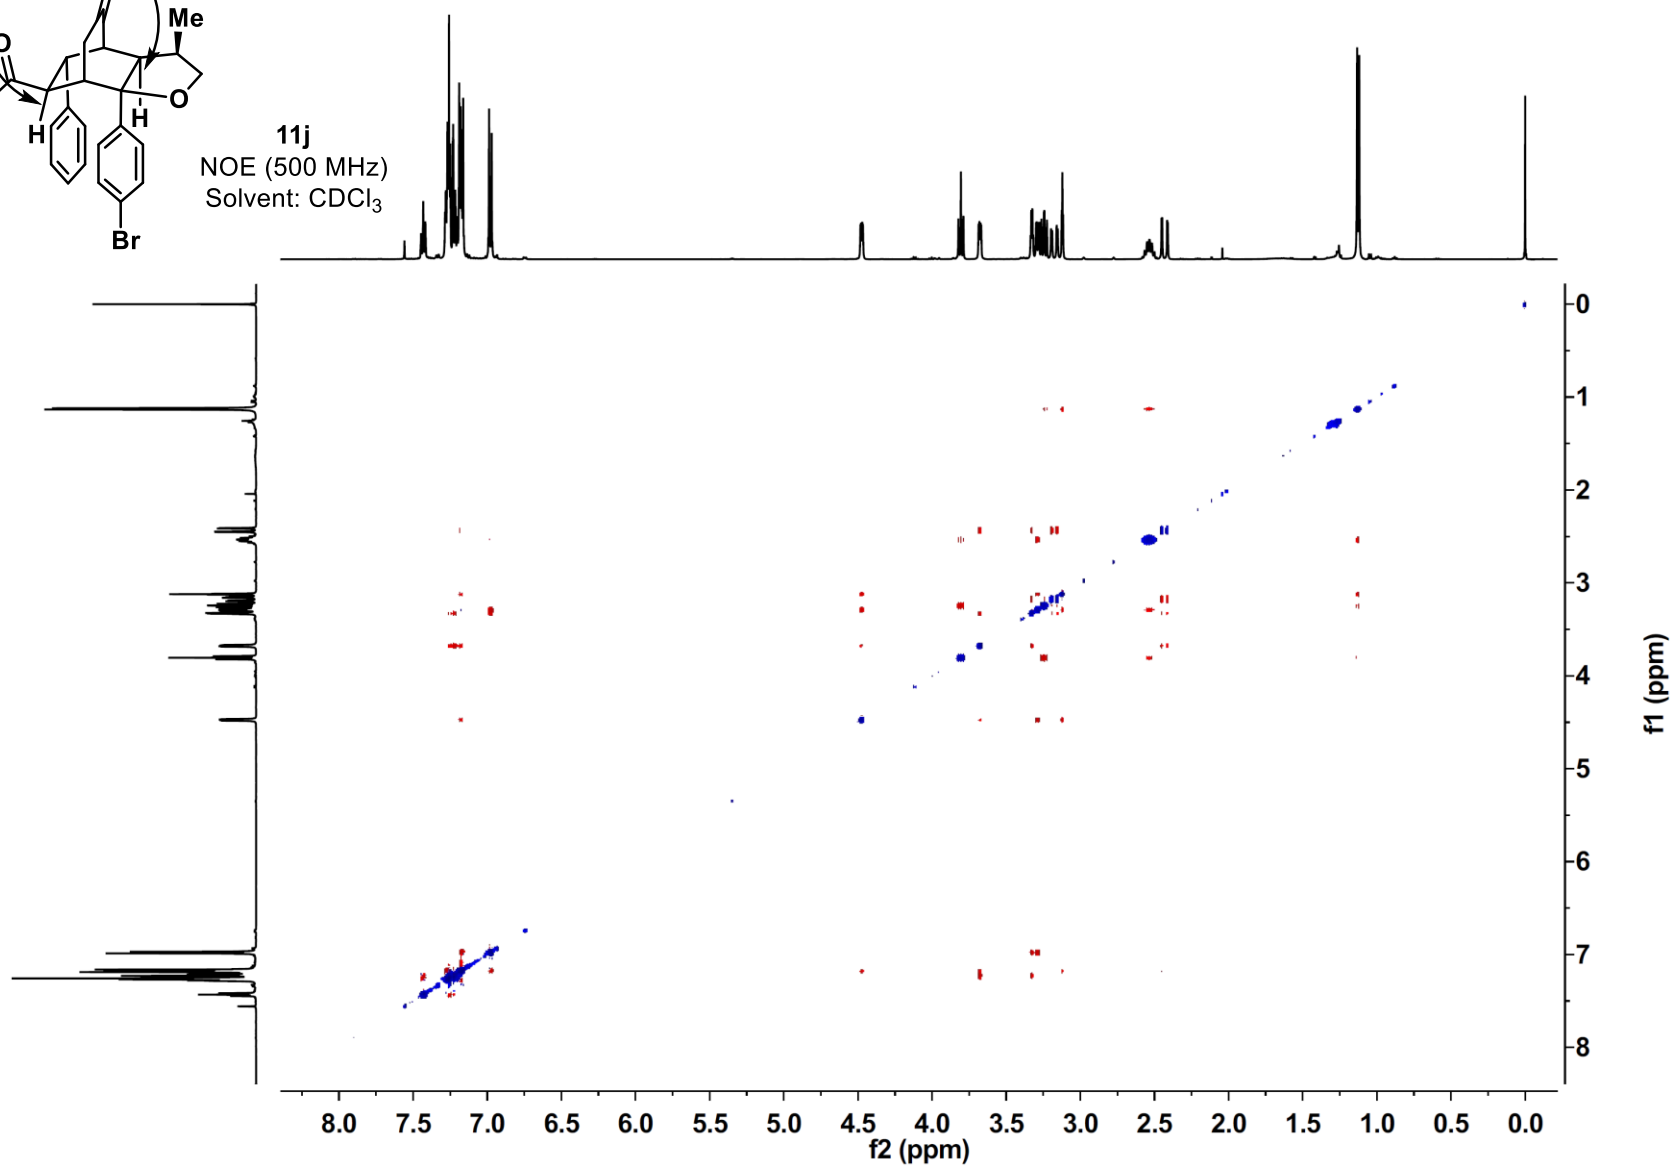

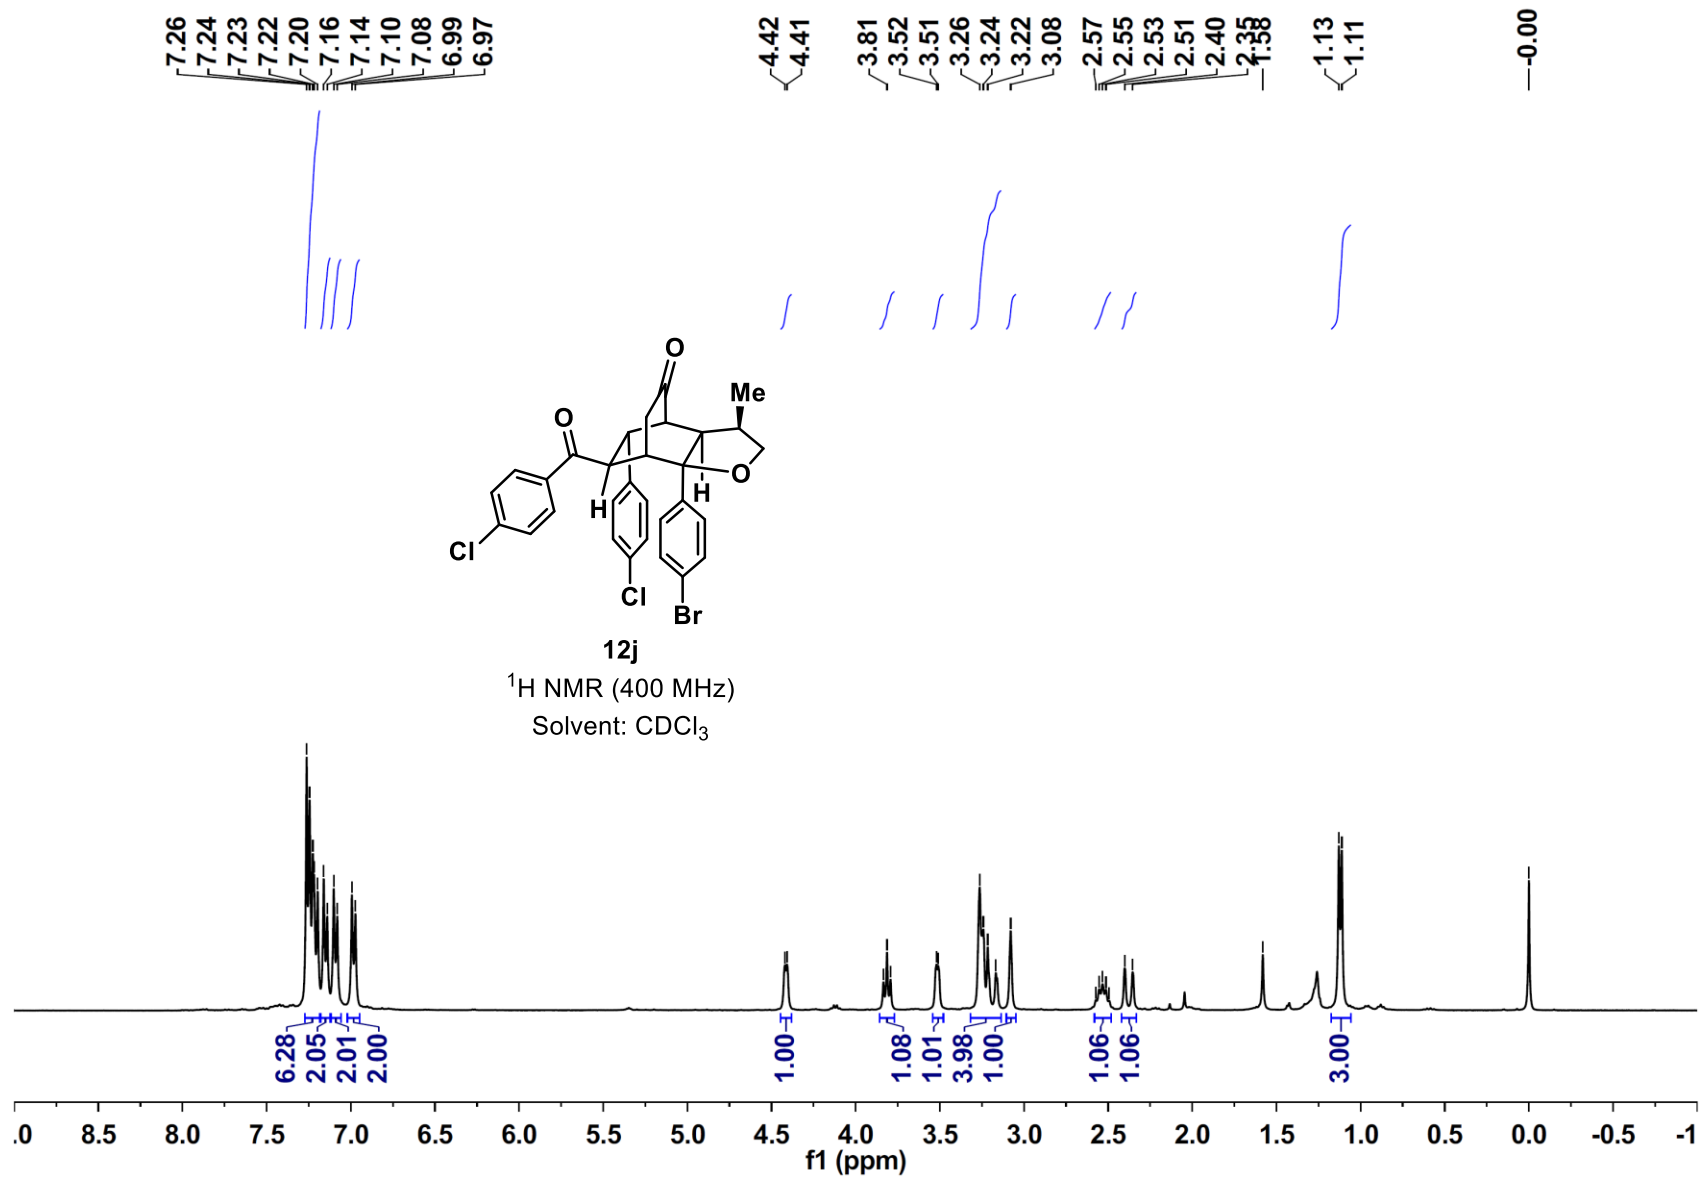

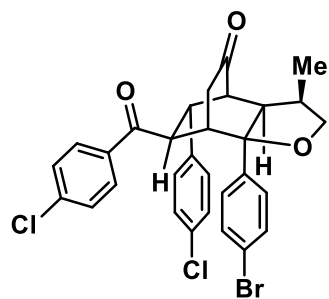

12j

$^{13}\text{C}$  NMR (100 MHz)  
Solvent:  $\text{CDCl}_3$

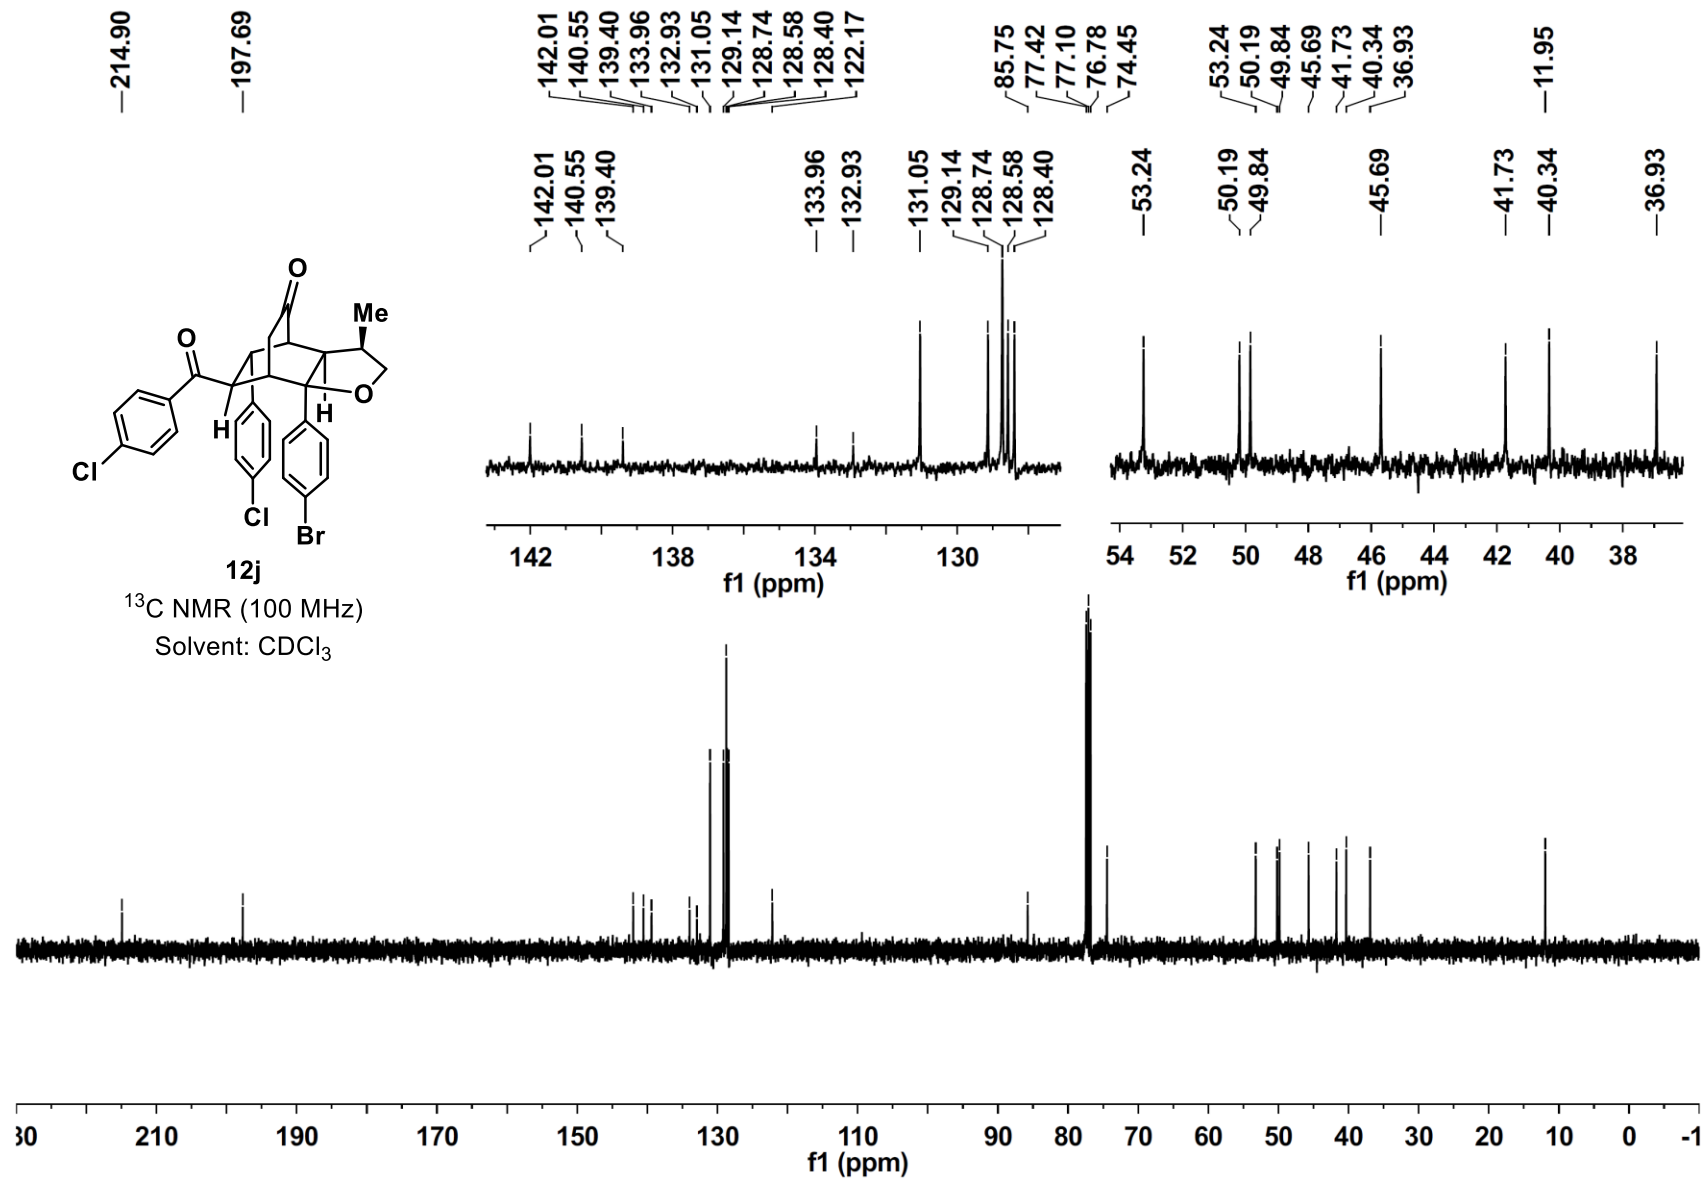

Supplement: d1cc03645a1.pdf [file d1cc03645a1.pdf]
